# Supplementary material for: Systematic Pan-Cancer Analysis Reveals Immune Cell Interactions in the Tumor Microenvironment
Source: Oxford University Press journal article supplement (doi:10.1158/0008-5472.can-16-2490), 2017-01-26
Supplement: 00085472can162490-sup-171601_1_supp_3787949_44b6g3.xlsx [file 00085472can162490-sup-171601_1_supp_3787949_44b6g3.xlsx]

## Sheet: ImmGen weights
Supplementary Table S3- ImmGen weights and TCGA infiltration scores
	B.FRE.BM_up	MF.LU_up	NK.DAP12neg.SP_up	T.8MEM.SP.OT1.D45.LISOVA_up	B.FRE.BM_dn	MF.LU_dn	NK.DAP12neg.SP_dn	T.8MEM.SP.OT1.D45.LISOVA_dn
4932414J04Rik	0	0	0.0296355	0.00383555	0.008876	0.00455495	0	0
Mdh1	0.000792999	0.0165604	0	0	0	0	0.00201787	0.0271489
Otx1	0.000866635	0	0	0.0234202	0	0.00403186	0.0054941	0
Ehbp1	0.00321241	0.133101	0	0	0	0	0.0123692	0.0135055
B3gnt2	0.126043	0.00139688	0.00142848	0.0382154	0	0	0	0
Commd1	0.0030071	0.0138682	0	0	0	0	0.0100307	0.020644
1700093K21Rik	0	0	0.0380356	0	0.00264021	0.0194427	0	0.00297634
0610010F05Rik	0	0.0579521	0.0632135	0	0.0499329	0	0	0.017134
Gm12060	0	0	0	0.00696135	0.00532298	0.0044284	0.0150589	0
Pex13	0	0.0112463	0	0	0.000653384	0	0.0361155	0.0286247
Rel	0.268802	0.00219875	0	0	0	0	0.0155981	0.0259673
Papolg	0.00476696	0	0.0350887	0.0550111	0	0.0538755	0	0
Gm10466	0	0	0	0	0.00537218	0.00433886	0.00151545	0.00394321
Fancl	0	0	0	0	0.00748643	0.0279189	0.00375386	0.0261173
Ccdc85a	0	0	0	0	0.00356472	0.0118305	0.00316207	0.00540206
Ccdc104	0	0	0.0187898	0	0.0207574	0.00804369	0	0.0128775
Sptbn1	0.0141012	0	0.0355482	0	0	0.0467845	0	0.0262363
4930505A04Rik	0.0131155	0	0.00609988	0	0	0.00698636	0	0.0252968
Acyp2	0	0.00632621	0	0.0262621	0.00932376	0	0.014695	0
Erlec1	0	0.00506708	0	0	0.0301622	0	0.00170778	0.0575498
Chac2	0.00152015	0	0.0274298	0	0	0.0229069	0	0.0246835
Stc2	0	0	0	0.0186961	0.00499361	0.0106332	0.0110871	0
Bod1	0	0	0	0.00766793	0.0283806	0.0118261	0.0709614	0
Il9r	0.000570073	0	0	0	0	0.01722	0.0294895	0.00898442
Rhbdf1	0	0	0	0	0.00971064	0.00256214	0.0224803	0.0225305
Nprl3	0	0	0	0	0.0168189	0.0247394	0.0569362	0.00249397
Efcab9	0	0	0.0124037	0.0225036	0.0106384	0.016547	0	0
1700008A04Rik	0.00843001	0	0.00907509	0	0	0.00206359	0	0.00751289
Fgf18	0	0	0.00182244	0	0.00959838	0.0143012	0	0.00439718
Tlx3	0	0	0.005961	0.00425793	0.00306224	0.0174379	0	0
Ranbp17	0	0	0	0	0.000467107	0.00320771	0.00833705	0.00626424
Gabrp	0	0	0.0109673	0.00847307	0.00606285	0.0122723	0	0
Kcnip1	0.00522437	0	0.0118501	0	0	0.0127436	0	0.00720148
Foxi1	0.000200814	0	0.0135144	0.0501488	0	0.00980847	0	0
Dock2	0.0302607	3.25348e-05	0.124733	0.103329	0	0	0	0
Spdl1	0.00856925	0.00143152	0	0	0	0	0.0112235	0.0095164
Fbll1	0	0	0	0.00209961	0.000728166	0.00272937	0.0091632	0
Rars	0	0.0269045	0	0.000176149	0.0202783	0	0.0177527	0
Wwc1	0.0066084	0	0.00431387	0.0203941	0	9.73448e-05	0	0
Tenm2	0	0	0.000266006	0.01776	0.0142259	0.00668737	0	0
Mat2b	0	0	0.00584126	0.0246709	0.0146378	0.0121368	0	0
Hmmr	0.0774781	0.0740922	0	0	0	0	0.0384982	0.074669
Ccng1	0	0.052691	0	0	0.0357514	0	0.0113584	0.0103084
Gabrg2	0.00146813	0	0.00226018	0.0119858	0	0.00723235	0	0
Gabra1	0	0	0.0158384	0.00421272	0.0243951	0.0141436	0	0
Gabra6	0.00244675	0	0.0233589	0.000957115	0	0.00843445	0	0
Mir146	0.00665312	0	0.0236883	0.157841	0	0.0141488	0	0
Pttg1	0	0.0227162	0	0.055556	0.038319	0	0.0199849	0
Fabp6	0	0	0.00606889	0.0316718	0.0164334	0.0145036	0	0
Ttc1	0	0.00447607	0	0.00385995	0.0255903	0	0.00517154	0
Adra1b	0	0	0	0	0.00204352	0.00421474	0.00352879	0.00585075
Lsm11	0	0	0.00395467	0.00177404	0.00269202	0.0183865	0	0
Thg1l	0	0	0	0	0.0117274	0.0109524	0.109048	0.0501934
Nipal4	0	0	0.00778676	0	0.0101739	0.00838305	0	0.00485171
Cyfip2	0.134317	0	0.0514389	0.00981039	0	0.62602	0	0
Itk	0	0	0.86996	1	0.174443	0.0904662	0	0
Dppa1	0	0	0.0376746	0.0188784	0.0149461	0.0175942	0	0
Timd2	0.0114246	0.00271737	0.00045603	0.00559283	0	0	0	0
Sgcd	0	0	0.00454735	0.0049842	0.00184962	0.00432295	0	0
Trim41	0	0.024958	0	0	0.00403866	0	0.0270431	0.0479618
Irgm1	0	0	0	0	0.0177281	0.0984017	0.00444868	0.00218897
Gm5431	0.172878	0.00610341	0	0.00123788	0	0	0.0205634	0
Gm12185	0	0	0	0.0614119	0.00416044	0.0193326	0.00417145	0
Olfr1396	0.0143971	0	0.000617892	0.0174142	0	0.00769455	0	0
Btnl9	0.000492362	0	0	0.00794733	0	0.00858128	0.0152443	0
1700024J04Rik	0.0377001	0	0	0	0	0.011108	0.000693282	0.0187639
Cnot6	0	0	0.00253212	0	0.0113579	0.0421418	0	0.0285521
Sqstm1	0	0.0608772	0.00796542	0.00433293	0.0567983	0	0	0
Ltc4s	0	0.486892	0	0	0.0137857	0	0.0137351	0.00593717
Maml1	0.0192627	0	0.0250509	0	0	0.00777712	0	0.0064354
Canx	0.00115803	0.0383095	0	0	0	0	0.0497677	0.0455388
Rufy1	0.0762329	0.0637924	0	0	0	0	0.0453182	0.0284667
Zfp354c	0.0210232	0	0	0.0400928	0	0.033863	0.0210928	0
Zfp879	0	8.96481e-05	0	0	0.000379626	0	0.0043526	0.0192187
Zfp454	0.00394728	0	0	0.00427359	0	0.00607207	0.00415683	0
Zfp2	0	0	0	0	0.0124125	0.0207273	0.0214098	0.0221996
Zfp354b	0.000293195	0	0.00586282	0	0	0.0107348	0	0.0132139
Prop1	0	0	0.0116122	0	0.00423817	0.0115217	0	0.0090797
BC049762	0.00550501	0	0	0	0	0.0105385	0.00747852	0.015366
Hnrnpab	0	0.0153671	0	0	0.0101148	0	0.0416351	0.0284057
Rmnd5b	0.0147674	0	0	0.0574128	0	0.0172119	0.0335199	0
0610009B22Rik	0	0.0587067	0	0	0.0193361	0	0.00604318	0.00388061
Sec24a	0	0.0818993	0.0424807	0.109897	0.0010785	0	0	0
Phf15	0	0	0.146034	0.0752558	0.138306	0.0145287	0	0
Ube2b	0	0.0200312	0.000595458	0.0222102	0.0392985	0	0	0
Olfr1372-ps1	0	0.0020026	0	0	0.00585753	0	0.00630949	0.0101087
Tcf7	0	0	0.223279	0.737281	0.68655	0.384521	0	0
Hspa4	0.00992949	0.011846	0	0	0	0	0.0551641	0.0189735
Leap2	0.0244479	0	0.030065	0	0	0.00879079	0	0.0227615
Uqcrq	0	0	0	0	0.0373181	1.88399e-05	0.0411506	0.0614465
Sowaha	0	0	0	0.0245422	0.00431319	0.00410036	0.00695906	0
Il4	0	0	0.00293547	0	0.00271302	0.0105592	0	0.0129018
Il13	0.000378229	0	0.0116896	0	0	0.00548958	0	0.00534444
Rad50	0	0.00216411	0	0	0.00629518	0	0.0199856	0.0276311
Irf1	0	0	0.0746861	0.0142956	0.00470554	0.0895222	0	0
Slc22a5	0	0	0	0.0208393	0.0175431	0.0006166	0.00111272	0
Slc22a21	0	0	0.0181648	0	0.00680958	0.0043584	0	0.0766395
Slc22a4	0	0	0	0	0.029474	0.00601504	0.0181388	0.0204826
Pdlim4	0	0	0	0	0.0129017	0.0223825	0.0121261	0.0266926
Csf2	0.00683313	0	0.0347187	0.0262638	0	0.00915282	0	0
Il3	0.00621448	0.00252015	0	0.0274174	0	0	0.0015056	0
Cdc42se2	0	0	0	0.0176211	0.00536053	0.0391223	0.0245895	0
Lyrm7	0	0	0.0106826	0.00617928	0.000713619	0.0280174	0	0
Tnip1	0	0	0	0.00053386	0.0133233	0.0383435	0.0340808	0
Ccdc69	0	0	0	0.00842944	0.0141378	0.053619	0.051297	0
Slc36a3	0	0	0	0	0.00673718	0.00778184	0.00643621	0.00068894
Slc36a2	0	0	0.00281683	0	0.00152129	0.00600521	0	0.0148353
Fat2	0.00651281	0.00420257	0.000269036	0.00150981	0	0	0	0
Sparc	0	0.0624251	0	0.0073426	0.00490538	0	0.010815	0
Atox1	0	0.0456332	0	0	0.0389083	0	0.0569512	0.0409595
Glra1	0	0	0.0144044	0.0131623	0.00389734	0.00220716	0	0
Nmur2	0	0	0	0	0.0157715	0.00166828	0.00466279	0.0174827
Fam114a2	0	0	0	0	0.000829342	0.00482856	0.035032	0.00521019
Hand1	0	0	0.0024343	0	0.00568074	0.0118041	0	0.00744209
Gm12248	0.00342231	0	0	0.0315541	0	0.00563445	0.00942857	0
Gemin5	0.000308741	0	0	0	0	0.0275844	0.0819283	0.0155277
Zfp672	0	0	0.0100852	0.00497101	0.00154521	0.0201414	0	0
4930504O13Rik	0.00654029	0	0	0	0	0.00857967	0.0113728	0.00639762
Olfr30	0.00475187	0	0	0.00242861	0	0.0142896	0.00447902	0
Olfr332	0.00543137	0	0.00036877	0	0	0.0187359	0	0.0145765
Olfr330	0.0228846	0	0	0	0	0.0112224	0.00848745	0.00724724
2210407C18Rik	0.0133359	0	0	0.0354376	0	0.0087119	0.00747962	0
Olfr323	0.00504859	0	0.0264804	0.0303861	0	0.0147861	0	0
Olfr317	0.00565748	0	0	0	0	0.00625163	0.00914149	0.015602
Fam183b	0	0	0.0252809	0.000271287	0.0144173	0.0120092	0	0
Zfp39	0.00234681	0	0	0.0269451	0	0.0486495	0.0218437	0
Rnf187	0.0144446	0	0.0190232	0.00326939	0	0.0185693	0	0
Hist3h2bb-ps	0	0	0	0	0.0089441	0.0185919	0.0255317	0.00653774
Gjc2	0	0	0	0	0.00318964	0.00677731	0.00523773	0.00530775
Guk1	0	0.0140157	0	0.00864998	0.0442573	0	0.0149131	0
Wnt3a	0	0	8.13621e-05	0	0.000418431	0.00281543	0	0.00299765
Prss38	0.00499608	0	0.00543573	0.0190903	0	0.0078544	0	0
Snap47	0	0	0	0	0.101472	0.0210638	0.00747918	0.0042777
Zfp867	0	0	0.00778451	0	0.00794115	0.0401703	0	0.00235375
Zkscan17	0.00222418	0	0.0243705	0	0	0.0494866	0	0.0186324
Olfr222	0.017982	0	0.022239	0.00862223	0	0.0160688	0	0
Olfr223	0.0346068	0	0.00913958	0	0	0.00800753	0	0.000439549
Pld6	0	0	0	0.00234788	0.0194403	0.00553038	0.00756233	0
Flcn	0.00939608	0.0181291	0.00770671	0	0	0	0	0.01752
Rasd1	0	0	0	0.00133286	0.00386314	0.013481	0.0164059	0
Srebf1	0	0	0	0	0.000330105	0.000857313	0.0100237	0.0333062
Tom1l2	0	0.00887656	0	0	0.00202376	0	0.00545737	0.0219601
Atpaf2	0	0	0.0109298	0	0.00395507	0.0119709	0	0.00618369
Flii	0.0217156	0.0229809	0.0306668	0	0	0	0	0.00149796
Top3a	0.0252351	0	0	0.00384097	0	0.0162366	0.00470418	0
Shmt1	0.00709132	0.000415017	0	0	0	0	0.0358229	0.0248683
Gm12618	0	0	0	0.0102906	0.0163103	0.00112552	0.00750752	0
Tmem11	0	0.0291659	0	0	0.018622	0	0.0216529	0.0498268
Gm16515	0.0445634	0.00180515	0.0185069	0	0	0	0	0.0133903
Gm16516	0	0.000561082	0	0	0.0127189	0	0.0376119	0.0129042
Usp22	0	0.0192152	0	0	0.00605473	0	0.0670131	0.0277844
Aldh3a2	0	0.0620366	0.0279878	0.0224786	0.000592511	0	0	0
Slc47a2	0.00934234	0	0	0	0	0.00826683	0.0140327	0.000931269
Slc47a1	0.00425388	0	0	0	0	0.00829892	0.00287613	0.00272485
Gm12271	0.0102077	0	0.000293384	0.0213254	0	0.0100854	0	0
Rnf112	0.000203113	0	0	0	0	0.00722765	0.0117608	0.0103024
Mapk7	0.0167772	0	0	0	0	0.00948084	0.0164237	0.032434
Epn2	0.000186439	0	0	0.0263642	0	0.00672414	0.0146207	0
Prpsap2	0.0209782	0	0	0	0	0.0250161	0.018668	0.00979625
Ulk2	0	0.0299876	0.0404285	0.0280015	0.0267228	0	0	0
Akap10	0.0279312	0.00581307	0	0	0	0	0.0215846	0.011125
Zswim7	0	0	0	0	0.0219554	0.00976003	0.0719063	0.021892
Ncor1	0	0	0.0301535	0.0170279	0.00018495	0.0144545	0	0
Cenpv	0	0.029063	0	0	0.0227751	0	0.030649	0.025109
Fam211a	0	0.00334173	0.0173944	0	0.0210298	0	0	0.0081541
Zfp287	0	0	0.0720105	0.0972411	0.0615562	0.0609926	0	0
Zfp286	0.00106185	0	0	0.00157684	0	0.0138305	0.0110232	0
Hs3st3b1	0	0	0.329893	0.266487	0.0285856	0.0205087	0	0
Cox10	0.000942467	0	0	0.0109307	0	0.0253726	0.00265791	0
1700086D15Rik	0	0	0	0.00590765	0.000243544	0.00798788	0.00587016	0
Myocd	0	0	0	0	0.000218659	0.00608818	0.0100579	0.00316038
Map2k4	0	0.0105433	0	0	0.00716804	0	0.00176514	0.00631797
Dnah9	0.00688449	0	0	0.00646366	0	0.0127149	0.00567633	0
Shisa6	0.00164491	0	0.00276978	0.0120219	0	0.0113375	0	0
Gm12298	0	0.0117161	0	0	0.00284944	0	0.00228873	0.0065196
Adprm	0	0	0	0.0415478	0.0104477	0.00119826	0.00236835	0
Glp2r	0.00364678	0	0.0136657	0.0285555	0	0.00397109	0	0
Usp43	0.00695724	0	0.00289666	0	0	0.00477836	0	0.0232186
Wdr16	0.00260988	0	0.011155	0	0	0.00277919	0	0.00543963
Ntn1	0	0	0	0	0.00892588	0.00874625	0.00258655	0.0517658
Odf4	0.000800646	0	0.0152763	0.00624026	0	0.01602	0	0
Arhgef15	0	0	0	0	0.00174008	0.00598857	6.92789e-05	0.00795992
Pfas	0.0292151	0	0	0	0	0.0164364	0.0292308	0.023333
Alox8	0.00694988	0	0	0.053917	0	0.0164005	0.00852519	0
Gucy2e	0	0	0	0.00930917	0.0104611	0.00558471	0.0157673	0
Cntrob	0.0202173	0	0	0	0	0.0238909	0.00426477	0.0308308
Dnah2	0	0.00229318	0	0	0.0142374	0	0.0223902	0.000357799
Efnb3	0	0	0	0.0105467	0.0216013	0.0112324	0.00699715	0
Wrap53	0.00820605	0	0	0.0113112	0	0.0389639	0.00224765	0
Atp1b2	0	0	0.00209111	0	0.00411075	0.00741281	0	0.00263572
Shbg	0.00780208	0	0	0	0	0.0106946	0.0108369	0.00339527
Mpdu1	0	0.00258755	0	0	0.0223009	0	0.0230322	0.0600985
Cd68	0	0.850198	0.0018297	0	0.0190028	0	0	0.0362701
Senp3	0	0.0108661	0	0.0100558	0.0210434	0	0.0129863	0
Polr2a	0.0615006	0.0201294	0.0292501	0	0	0	0	0.00809072
Slc35g3	0.00803156	6.73123e-06	0	0	0	0	0.0103801	0.0161336
Chrnb1	0.0407578	0	0	0	0	0.0313042	0.0129046	0.0214504
Fgf11	0	0.0232086	0	0.014894	0.0170711	0	0.0136312	0
4933402P03Rik	0	0	0	0	0.00406687	0.00681555	0.0369099	0.0285982
Spem1	0.0119576	0	0.0013009	0.0168593	0	0.00958736	0	0
Nlgn2	0	0	0	0	0.026417	0.0291727	0.0197639	0.0520372
Acap1	0	0	0.035833	0.0242626	0.00102443	0.310308	0	0
2810408A11Rik	0	0	0	0	0.011246	0.00897091	0.00849268	0.0028717
Slc2a4	0	0.0010302	0	0.00231657	0.0027818	0	0.0184768	0
Elp5	0	0.000681261	0	0	0.00722936	0	0.0807858	0.0591941
Slc16a13	0	0	0	0	0.0263383	0.0441889	0.0166504	0.0147859
Bcl6b	0	0	0.00955133	0.0269487	0.0053064	0.0124692	0	0
0610010K14Rik	0	0	0	0	0.0500055	0.0319916	0.00327278	0.000761353
Rnasek	0	0.00849955	0.0282997	0	0.0455386	0	0	0.000530208
Alox12	0.0182869	0	0	0	0	0.0110702	0.00362529	0.0190124
Alox12e	0.00100003	0	0.0161378	0	0	0.0106958	0	0.00698017
Alox15	0.000913336	0	0	0	0	0.00959085	0.0187763	0.00401327
Pelp1	0.000948888	0	0	0	0	0.0244319	0.00900018	0.0146446
Cxcl16	0.000232299	0.0201868	0	0	0	0	0.00133651	0.0225189
Vmo1	0.00166702	0	0	0	0	0.00952689	0.0176212	0.0237703
Chrne	0.00989597	0	0.253755	0.0241291	0	0.0122893	0	0
Slc25a11	0.0091956	0.0230633	0	0	0	0	0.0105624	0.0410524
Spag7	0	0	0	0	0.0137573	0.0109172	0.0122407	0.000716214
Camta2	0.00860738	0.0147747	0.0142345	0	0	0	0	0.00857683
Inca1	0	0	0.00862803	0	0.0056405	0.0159709	0	0.0144737
Scimp	0.0730605	0.348388	0.805798	0	0	0	0	0.0184676
Nup88	0.0064231	0	0	0	0	0.00282672	0.0260622	0.00282411
C1qbp	0	0	0	0	0.0194444	0.00784462	0.107004	0.00341828
Dhx33	0	0	0.00510698	0	0.0248623	0.00132825	0	0.00326923
Derl2	0	0.023989	0	0	0.00761943	0	0.0153961	0.00478387
6330403K07Rik	0	0	0.0295169	0.0519917	0.00111239	0.0156427	0	0
Nlrp1a	0	0.0424076	0	0	0.0266753	0	0.0333332	0.0216258
Nlrp1b	0	0.131695	0	0	0.0488743	0	0.0255855	0.0217262
Nlrp1c-ps	0	0.0946342	0	0	0.00755486	0	0.00748966	0.023204
Aipl1	0	0	0.0110934	0.00126317	0.00156653	0.0131866	0	0
Pitpnm3	0	0	0	0	0.00492824	0.00302646	0.0149164	0.00127312
4933427D14Rik	0.00433504	0	0.0174281	0.00399461	0	0.022794	0	0
Med31	0	0.0106078	0	0.0102046	0.0179239	0	0.00853865	0
Slc13a5	0	0	0.010791	0.0131651	0.00857859	0.00550501	0	0
Tekt1	0	0	0.000593648	0.000182655	0.00875174	0.00511225	0	0
Smtnl2	0.0245519	0	0	0	0	0.00504896	0.0257365	0.0184777
Spns2	0.245608	0	0	0	0	0.00446327	0.0331176	0.0188978
Spns3	0.399337	0	0	0	0	0.0500652	0.00810767	0.0629322
Cyb5d2	0	0.0241419	0	0.00399001	0.0527886	0	0.00107458	0
Gsg2	0	0	0.158863	0.0387955	0.0178588	0.0236332	0	0
Emc6	0	0.0376108	0	0	0.00999507	0	0.0297071	0.0106699
Ctns	0	0.128728	0.0160791	0	0.0161255	0	0	0.0212283
Aspa	0.000869626	0	0.0068254	0	0	0.00856447	0	0.000521329
Olfr1	0.0101643	0	0	0	0	0.00215448	0.00412637	0.0198558
Olfr378	0.00478447	0	0.0292998	0.0115676	0	0.00998842	0	0
Olfr380	0	0	0.0341367	0.0194435	0.000195698	0.017308	0	0
Olfr381	0.00233462	0	0.0375736	0.0104767	0	0.00678009	0	0
Olfr382	0.00350382	0	0.0162261	0	0	0.0101546	0	0.0055158
Olfr385	0	0	0.0258528	0.00464942	0.00229391	0.00431214	0	0
Olfr389	0.0103782	0	0.00997089	0.00355941	0	0.00279082	0	0
Olfr391-ps	0.0257809	0	0.0356951	0.0111523	0	0.0151513	0	0
Olfr392	0	0	0.00256585	0.0155183	0.00179748	0.00641334	0	0
Olfr393	0.00135375	0	0.0152823	0.00641497	0	0.00703639	0	0
Olfr394	0	0	0	0	0.00688193	0.0073737	0.00275421	0.00708983
Olfr395	0.00349197	0	0	0	0	0.0140259	0.000350607	0.0124266
Olfr398	0.00319468	0	0.00602335	0.00401106	0	0.00297391	0	0
Olfr139	0.00513969	0	0.0101311	0	0	0.0111775	0	0.001933
Olfr399	0.0189536	0	0.00508332	0	0	0.00466394	0	0.00905666
Olfr43	0	0	0	0.0197623	0.00601954	0.021365	0.00586054	0
Olfr410	0.0333731	0	0.00900485	0	0	0.000498087	0	0.00451783
Olfr411	0.00332017	0	0	0	0	0.00684134	0.00107885	0.00374133
Rap1gap2	0	0	0.614543	0.434277	0.067337	0.0802368	0	0
Pafah1b1	0	0.008884	0	0.0189723	0.00113292	0	0.0116233	0
Sgsm2	0	0.00102077	0	0.0118616	0.0309101	0	0.00525056	0
Srr	0	0	0.0120451	0	0.00475458	0.0038465	0	0.0231168
Hic1	0	0	0.00342265	0.00796822	0.0261645	0.00986117	0	0
Rpa1	0	0	0.00295329	0.00897805	0.0424679	0.01876	0	0
Serpinf1	0.00160069	0	0	0	0	0.0275409	0.0236848	0.0107456
Serpinf2	0	0	0	0	0.0075987	0.00325919	0.00621071	0.0138246
Wdr81	0.0947497	0.0264699	0.0164875	0	0	0	0	0.0371975
Doc2b	0	0	0.012232	0	0.0100703	0.00919803	0	0.0196311
Rph3al	0.00075016	0	0.0116887	0.0119922	0	0.014854	0	0
Fam101b	0	0	0	0.0463205	0.0306969	0.0328068	0.0115024	0
Vps53	0	0.00173448	0	0	0.00160163	0	0.020608	0.00264988
Glod4	0	0.0265443	0	0	0.0314008	0	0.104021	0.0275751
Nxn	0	0	0	0.0128832	0.0389369	0.0530299	0.0244467	0
Abr	0	0.0976043	0.0498718	0	0.304924	0	0	0.00852486
Gosr1	0	0.0109847	0.0239768	0.0432189	0.0101037	0	0	0
Cpd	0	0.288223	0	0	0.0540707	0	0.0201496	0.203046
Ccdc55	0.0216314	0.0188758	0	0	0	0	0.0500211	0.00336885
Mir423	0	0	0	0	0.00522613	0.0202209	0.00436521	0.0209863
Efcab5	0.00185056	0	0	0	0	0.0108949	0.01228	0.00273472
Ankrd13b	0	0.0127531	0	0	0.0239155	0	0.0161516	0.042279
LOC100038422	0	0	0	0.0907252	0.000312539	0.0112521	0.0106406	0
Cryba1	0	0.00283488	0.0278289	0.0167178	0.0157675	0	0	0
Pipox	0.0518259	0	0.0030701	0	0	0.0125979	0	0.032045
Gm11190	0.00250462	0	0	0.00833909	0	0.00565331	0.0139137	0
Eral1	0	0	0	0.000713869	0.00204828	0.0173748	0.0446139	0
Traf4	0.0261554	0	0	0	0	0.0623047	0.013888	0.0364292
Nek8	0.00377302	0	0	0	0	0.00642762	0.0156706	0.0258843
Snord42b	0	0	0	0.0241102	0.054742	0.0175137	0.068044	0
Supt6	0	0	0.0127022	0	0.00502644	0.00350024	0	0.0196866
Foxn1	0.00653317	0	0.0284569	0.00715886	0	0.00276271	0	0
Slc13a2	0.0123585	0	0.00679053	0.00358389	0	0.00201697	0	0
Sarm1	0	0	0	0.0141088	0.00501597	0.0131517	0.0201353	0
Tmem199	0.000154696	0.0124455	0	0.00345212	0	0	0.0274658	0
Tnfaip1	0	0.0328952	0	0.0216524	0.00529224	0	0.0300426	0
Nlk	0	0	0.0338407	0.0674933	0.01027	0.014172	0	0
Fam58b	0	0	0	0.039117	0.0154691	0.0159488	0.00997359	0
Lgals9	0.00341658	0	0	0	0	0.0510341	0.00157489	0.0534767
Wsb1	0.0206772	0.0539304	0	0	0	0	0.0331068	0.0504047
Omg	0	0	0	0.0101257	0.00845024	0.00106167	0.00207488	0
Utp6	0	0.0244703	0	0	0.000515054	0	0.060157	0.00781598
Crlf3	0	0	0	0.0145022	0.00418311	0.0364234	0.0260944	0
Tefm	0.00663183	0.00273144	0	0	0	0	0.0202472	0.0185973
5730455P16Rik	0.0143459	0	0	0	0	0.00739247	0.0605194	0.00101857
Asic2	0.00464257	0	0	0	0	0.00532429	0.0115168	0.01241
1700071K01Rik	0	0.00134159	0	0.00529091	0.0182412	0	0.0260958	0
Ccl1	0.0115286	0	0	0.000877815	0	0.00830763	0.000748124	0
Cct6b	0	0	0	0.00530382	0.000231748	0.00496528	0.00519388	0
Rffl	0.00170196	0.0213302	0	0.00513553	0	0	0.0106942	0
Rad51d	0	0	0	0	0.0202368	0.0201512	0.0215038	0.0275483
Nle1	0	0	0	0.00698187	0.0108796	0.0214571	0.0392166	0
Slfn8	0.0382743	0	0.0428809	0.190016	0	0.344697	0	0
Pex12	0	0	0	0	0.0142228	0.0096366	0.0249236	0.00588387
Gas2l2	0	9.44725e-05	0	0.00264432	0.0085722	0	0.000118575	0
Gm11435	0	0	1	1	0.00215039	0.0178143	0	0
Ccl5	0	0	1	1	0.115232	0.0659331	0	0
Ccl9	0	0.278996	0.0483326	0.694725	0.00457302	0	0	0
Ccl6	0.0106424	1	0	0.147406	0	0	0.00359028	0
Ccl3	0	0.589494	1	0.639914	0.207867	0	0	0
Dusp14	3.12675e-06	0	0	0	0	0.0148704	0.0046243	0.00745305
Tada2a	0	0	0	0	0.00221118	0.00323232	0.0812168	0.0459897
Gm11437	0	0	0.000991132	0.00175491	0.00826727	0.0160455	0	0
Aatf	0	0	0	0	0.0274751	0.00670047	0.044974	0.0117118
Lhx1	0.0118643	0	0	0.0147698	0	0.0129582	0.00525384	0
Dhrs11	0.0263187	0	0.0539966	0.00202235	0	0.0090131	0	0
Ggnbp2	0.000944706	0.0209551	0.00330307	0.0216547	0	0	0	0
Usp32	0	0.0415761	0.00266728	0	0.0137905	0	0	0.00390853
Appbp2	0.00421319	0	0	0	0	0.0108272	0.0116628	0.0200659
Brip1	0.0235282	0.0371931	0	0	0	0	0.0802145	0.121749
Ints2	0.0215711	0	0	0	0	0.0165054	0.0265274	0.020591
Med13	0.249261	0	0.00260981	0	0	0.0127078	0	0.0289414
Rps6kb1	0.0151737	0.00036256	0	0.00598851	0	0	0.0192138	0
Cltc	0.0648023	0.057639	0	0	0	0	0.0175831	0.0308108
Dhx40	0.0165787	0.0306591	0	0	0	0	0.0390114	0.0169264
Ypel2	0.0448909	0.00636345	0	0	0	0	0.0842732	0.099755
Gdpd1	0	0.0510892	0	0	0.0429427	0	0.0248772	0.0310089
Smg8	0	0.00537424	0	0	0.00465274	0	0.00055344	0.00748252
Prr11	0.0603483	0.0406396	0	0	0	0	0.0393958	0.0921739
Ppm1e	0.685908	0	0	0.00262607	0	0.0128914	0.0108742	0
Rad51c	0.0166725	0	0	0	0	0.00799118	0.0262179	0.00892554
Lpo	0	0	0	0	0.000207808	0.00659056	0.0270595	0.0103893
Epx	0.00320975	0	0	0.000456571	0	0.00256192	0.000436487	0
Olfr462	0.00552741	0	0.00674602	0	0	0.0130595	0	0.023762
Olfr464	0.0189873	0	0	0.00173867	0	0.00693048	0.00445199	0
Dynll2	0	0	0	0	0.0832955	0.0178466	0.0033551	0.0222044
Msi2	0.106289	0	0.00926255	0	0	0.496135	0	0.037487
Akap1	0	0	0	0	0.0254353	0.000110467	0.0611102	0.009788
Scpep1	0.168234	0.129167	0	0	0	0	0.182096	0.0283045
Dgke	0.0388998	0.0153061	0	0	0	0	0.087631	0.0066604
Nog	0	0	0	0.0029346	0.0164229	0.0015421	0.0112268	0
4932411E22Rik	0	0	0	0.0146252	0.00943608	0.0134695	0.00301141	0
Ankfn1	0	0	0	0	0.0103102	0.00583194	0.00467265	0.0168149
Pctp	0	0.0588618	0.0484816	0	0.035747	0	0	0.020887
Hlf	0.00180497	0	0.000488588	0.0321508	0	0.0158834	0	0
Kif2b	0	0.00138593	0	0.00770462	0.00893243	0	0.000439104	0
Utp18	0	0.014686	0	0.00203502	0.0141654	0	0.055669	0
Nme1	0	0.034181	0	0	0.0331696	0	0.041553	0.0202012
Luc7l3	0.0201705	0	0	0	0	0.0408872	0.000674293	0.0123524
Abcc3	0	0	0	0	0.0154685	0.0199494	0.029121	0.0167912
Cacna1g	0	0	0	0	0.00829049	0.00391541	0.00718921	0.000398919
Epn3	0	0	0	0	0.00588303	0.00278369	0.0109282	0.0111014
Mycbpap	0	0	0.0134697	0.0132785	0.00700117	0.0040305	0	0
Rsad1	0.00716006	0	0	0	0	0.0135905	0.0268052	0.00405035
Eme1	0.0101981	0	0	0	0	0.00505855	0.0304136	0.0288109
Xylt2	0	0	0.0200639	0.0265035	0.000964599	0.0259205	0	0
Gm11541	0	0	0	0	5.49894e-05	0.00831403	0.00677396	0.0296279
Gm11545	0.00101305	0.0440418	0	0	0	0	0.0234143	0.0170308
Tmem92	0.00907548	0	0	0.00736827	0	0.0136493	0.00955393	0
A430060F13Rik	0.00133983	0	0.0138833	0	0	0.00252693	0	0.00696605
Sgca	0.0138019	0	0.0196797	0.00672783	0	0.0147951	0	0
Pdk2	0.0125677	0.0176075	0.0454623	0	0	0	0	0.0430656
Itga3	0	0	0.0192101	0	0.0257561	0.00792412	0	0.0097345
Dlx4	0.0139008	0	0.0172401	0	0	0.00993448	0	0.0166501
Kat7	0	0	6.29511e-05	0.001257	0.0205199	0.00743674	0	0
Nxph3	0	0	0	0.00437905	0.00424731	0.0082933	0.0107053	0
Ngfr	0.0084831	0	0	0	0	0.015812	0.0141742	0.0102333
B4galnt2	0.031355	0.00190001	0	0.000893623	0	0	0.00760914	0
Ube2z	0	0.00781258	0	0	0.0121751	0	0.00178976	0.00474758
Gm11529	0	0	0	0.0124517	0.00764559	0.0124075	0.0237816	0
Snx11	0.0464358	0.00367648	0	0	0	0	0.00336064	0.004709
Gm11517	0.0221555	0	0.019026	0.0775078	0	0.00468892	0	0
Nfe2l1	0.00586624	0.0526646	0.00271118	0	0	0	0	0.0298809
Cdk5rap3	0	0	0	0.00656541	0.0174871	0.000540792	0.00926295	0
Pnpo	0	0.0368293	0	0	0.0545957	0	0.0170181	0.016019
Sp2	0.0247496	0	0.0294912	0.0186913	0	0.0280146	0	0
Lrrc46	0	0	0.00037216	0	0.00166254	0.00393618	0	0.00731868
Tbx21	0	0	1	1	0.035317	0.0454138	0	0
Tbkbp1	0	0.00460464	0.0141671	0.0245505	0.0344188	0	0	0
Kpnb1	0	0	0	0	0.00397922	0.00595908	0.0368761	0.0113758
Npepps	0.00202548	0.0264835	0	0	0	0	0.0473781	0.0526824
Gpr179	0	0	0	0	0.00215222	0.00799315	0.0016262	0.00845944
Srcin1	0	0	0	0.0611723	0.00407956	0.0063248	0.000405663	0
E130012A19Rik	0	0	0	0.0013802	0.0455477	0.0134634	0.0226289	0
Pcgf2	0	0	0.11065	0.0812673	0.047315	0.0075005	0	0
Pip4k2b	0.0559002	0	0	0	0	0.0175736	0.00665408	0.0363927
1700001P01Rik	0.00462172	0	0.00436777	0.00498295	0	0.00518638	0	0
Fbxo47	0.022631	0	0	0	0	0.0235471	0.0264132	0.0100678
Plxdc1	0.00721882	0.0712197	0	0	0	0	0.0745958	0.0137635
Arl5c	0.150526	0	0	0	0	0.139236	0.0179292	0.0344447
Cacnb1	0.0126115	0	0	0	0	0.053967	0.0553043	0.0234317
Stac2	0.0152037	0.0121901	0	0.0111936	0	0	0.00302308	0
Fbxl20	0.00822419	0.0198966	0.00598201	0	0	0	0	0.0382068
Med1	0.0172136	0	0	0	0	0.0304211	0.0060117	0.00239743
Neurod2	0	0	0.00223671	0.0033529	0.00927101	0.018104	0	0
Pgap3	0	0	0.0563043	0	0.000142923	0.010069	0	0.0066864
Mien1	0	0.0357075	0.00842939	0.0311341	0.0261377	0	0	0
Ikzf3	0.603924	0	0.358015	0.218834	0	0.510893	0	0
Med24	0.0352354	0	0	0	0	0.0198452	0.0212033	0.0241831
Ormdl3	0.0302303	0	0.0454243	0.0090181	0	0.00769934	0	0
Gjd3	0	0	0	0.00952732	0.00549369	0.00638598	0.00565902	0
Tns4	0	0.00136148	0	0	0.0228986	0	0.00791204	0.0158747
Ccr7	0.0692153	0	0	0	0	0.142348	0.341056	0.0398522
Krt222	0.00935382	0	0.00562	0.000437788	0	0.016203	0	0
Krt24	0	0	0.0105542	0.0224925	0.0184016	0.0131591	0	0
Krt25	0.00509717	0	0	0	0	0.0133246	0.00908849	0.00397507
Krt26	0.00853566	0	0.00270579	0	0	0.0115892	0	0.0147775
Krt27	0.000240271	0	0.0136294	0.0275233	0	0.0107412	0	0
Krt28	0	0	0.00721239	0	0.00328447	0.011804	0	0.00231841
Krt10	0	0	0	0.000311556	0.00250469	0.00394809	0.00710192	0
Krt12	0	0	0.0024679	0.00768547	0.00534722	0.00416891	0	0
Krt20	0	0	0	0	0.0111891	0.0175609	0.0103568	0.00579885
Krt23	0	0	0.00191975	0	0.00298749	0.0059027	0	0.0127764
Krt39	0	0	0	0.00759251	0.00355528	0.00969016	0.000760197	0
Krt40	0	0	0	0.0225466	6.05406e-05	0.0098898	0.00081234	0
Krtap3-3	0	0	0	0.0139104	0.00770428	0.008817	0.00596561	0
Krtap3-2	0.00636857	0	0.00651853	0.00382572	0	0.0126738	0	0
Krtap3-1	0.00202066	0	0.0139188	0.00243108	0	0.00484849	0	0
Krtap1-5	0	0	0.0310426	0.00822846	0.00203	0.00682748	0	0
Krtap1-4	0.0170006	0	0.0203392	0.00403229	0	0.0163979	0	0
Krtap1-3	0.0160167	0	0.0135624	0.00466452	0	0.00162148	0	0
Krtap9-3	0.0144938	0	0.0036953	0.00820529	0	0.00540249	0	0
Krtap4-1	0	0	0.0330897	0.00554886	0.00485162	0.0115143	0	0
Krtap4-7	0.0172963	0	0.018417	0	0	0.0189185	0	0.00142739
Krtap4-6	0	0	0.00698707	0	0.00195419	0.00438541	0	0.0030661
Gm11564	0.00116402	0	0.0100827	0	0	0.0100986	0	0.00494086
Krtap4-16	0.00404229	0	0.0192719	0	0	0.0156124	0	0.00551164
Krtap17-1	0	0	0.00230157	0	0.00392199	0.0166689	0	0.00490236
Krt33a	0.00952227	0	0.00392681	0	0	0.00507303	0	0.0159679
Krt33b	0	0	0.0250597	0.0031925	0.00153833	0.0122363	0	0
Krt34	0.0031112	0	0.010357	0.0292721	0	0.00936316	0	0
Krt31	0.0132098	0	0.0287062	0.00717634	0	0.0120723	0	0
Krt32	0	0	0.00254137	0	0.00794482	0.0105374	0	0.00302507
Krt35	0.00775469	0	0.0132028	0	0	0.0142376	0	0.0103214
Krt36	0	0	0	0	0.00863101	6.9656e-05	0.0186467	0.0322754
Krt13	0.00955581	0	0	0	0	0.000373755	0.0107113	0.00307854
Krt15	0	0.0184054	0	0.000905616	0.0101167	0	0.00464876	0
Krt19	0	1	0.0142092	0.00151793	0.0137252	0	0	0
Krt9	0	0	0.000884669	0.00348679	0.0121574	0.00514275	0	0
Krt14	0	0.00236093	0.00518996	0.00992379	0.0135301	0	0	0
Krt16	0.027268	0	0	0.0152276	0	0.00314694	0.00235976	0
Krt17	0	0	0.00559866	0.0119105	0.00436493	0.00187086	0	0
Krt42	0	0	0.029048	0	0.0176527	0.00765435	0	0.00422217
Hap1	0	0	0	0.0122833	0.0144412	0.0160365	0.0121582	0
Jup	0	0.175911	0.0064708	0	0.147474	0	0	0.212794
Leprel4	0	0	0.0387318	0.0415288	0.0119849	0.00981162	0	0
Nt5c3b	0	0	0.00505545	0.00259568	0.0751924	0.070037	0	0
Klhl11	0.00611352	0	0	0.00874978	0	0.00860668	0.00145312	0
Acly	0.0184124	0.0235591	0.0213117	0	0	0	0	0.00815069
Dnajc7	0.0541872	0.00175199	0	0	0	0	0.0776242	0.022722
Zfp385c	0.00196025	0	0.0117753	0	0	0.00693489	0	0.00456828
Dhx58	0.00575139	0	0	0	0	0.0157682	0.0546273	0.0736629
Kat2a	0	0	0	0	0.0144877	0.0140237	0.0942324	0.00989335
Rab5c	0	0.0620855	0.015638	0	0.00951958	0	0	0.0070323
Kcnh4	0	0.0478025	0	0.0010988	0.00432574	0	0.0123486	0
Hcrt	0.000336991	0	0.0231376	0	0	0.0149547	0	0.0135354
Ghdc	0.021861	0.0141329	0.00555399	0.00549862	0	0	0	0
Stat5b	0	0	0	0.00605785	0.0347153	0.0111857	0.0461333	0
Stat3	0	0	0.00131178	0	0.040067	0.00592488	0	0.0146953
Ptrf	0	0	0	0.0111552	0.00867601	0.00618315	0.0084694	0
Psmc3ip	0	0	0	0	0.000500772	0.0291156	0.00696204	0.020706
Fam134c	0.0192922	0	0.0396704	0.00510737	0	0.0467051	0	0
Plekhh3	0	0	0.0391243	0	0.0123387	0.000727285	0	0.0286393
Ccr10	0	0	0	0	0.0250123	0.00721889	0.00997585	0.0189926
Ezh1	0	0	0.0497329	0.0365072	0.0135788	0.022865	0	0
Coa3	0	0.00369221	0	0	0.0254889	0	0.0173871	0.0259163
Aarsd1	0	0.00839086	0	0.000745661	0.00907587	0	0.0531252	0
Vat1	0	0.202597	0	0.0158361	0.0445118	0	0.00939917	0
Brca1	0.0648938	0.0133878	0	0	0	0	0.0112638	0.0402919
Etv4	0.0057043	0	0	0	0	0.0119259	0.0157132	0.00143213
Meox1	0.0031347	0	0.0108238	0.000928625	0	0.0071533	0	0
Sost	0	0	0.0114016	0.0130499	0.00118381	0.0126377	0	0
Dusp3	0.0787114	0.357682	0.00593781	0.00398356	0	0	0	0
Mpp3	0.00945516	0	0.000779313	0	0	0.0101431	0	0.00937107
Mpp2	0	0	0	0.024913	0.00631814	0.018263	0.00787212	0
Ppy	0.00440585	0	0.0117043	0.0034785	0	0.00959989	0	0
Pyy	0.00024698	0	0.014318	0.0106931	0	0.0140593	0	0
Tmem101	0	0	0	0.00570022	0.0168783	0.00304244	0.0315785	0
Lsm12	0.0124879	0.00444647	0	0	0	0	0.0107223	0.0553037
Hdac5	0.0371384	0	0	0	0	0.00737377	0.00184288	0.0501282
Atxn7l3	0.018945	0	0	0	0	0.0340941	0.00352841	0.0104957
Ubtf	0.0229468	0	0	0	0	0.034946	0.0202346	0.0144032
Slc4a1	0.00355065	0	0.00343808	0	0	0.00955212	0	0.00774742
Slc25a39	0	0.011706	0	0	0.0572871	0	0.0173947	0.06636
Fam171a2	0	0	0	0.00147365	0.00530323	0.00446958	0.0170237	0
Itga2b	0	0	0	0.0105222	0.0107827	0.0114091	0.0146584	0
Ccdc43	0.00938587	0	0	0	0	0.00118532	0.014528	0.0140206
Gjc1	0	0	0	0	0.0062675	0.00797377	0.00891367	0.00461723
Eftud2	0.0171053	0	0	0	0	0.0154682	0.000343479	0.0112217
Gfap	0.0108396	0	0.0195546	0.0172462	0	0.00274047	0	0
C1ql1	0	0	0.00133368	0.00553449	0.0130729	0.0128729	0	0
Plcd3	0.0101187	0	0.015956	0	0	0.0166719	0	0.00104547
1700023F06Rik	0.00457452	0	0	0	0	0.00836347	0.00981246	0.000176486
Spata32	0	0	0.000235829	0.0131973	0.0145684	0.022989	0	0
Map3k14	0.0168582	0	0	0	0	0.066461	0.042177	0.00932196
Plekhm1	0.126259	0.0477122	0.0100739	0	0	0	0	0.00519959
Lrrc37a	0	0	0.0216594	0.00883473	0.000617935	0.0142208	0	0
Gm884	0	0	0	0	0.00454859	0.00673618	0.0026287	0.012008
Lyzl6	0.00911793	0	0.00951118	0.00830727	0	0.00435114	0	0
Gosr2	0	0.00480354	0	0	0.0438516	0	0.0148986	0.0064566
Wnt9b	0.0118652	0	0	0	0	0.0100715	0.00358498	0.000668097
Nsf	0.0524416	0.0824767	0	0.00891014	0	0	0.0353734	0
Cdc27	0.0148679	0.00106293	0	0	0	0	0.00849401	0.0114248
1700052K11Rik	0.00894853	0	0	0	0	0.0308468	0.00148282	0.0168603
2016-03-10	0.0022508	0	0.00152286	0	0	0.00889899	0	0.0162454
Cyb561	0.00201985	0.167764	0	0.0158718	0	0	0.0102587	0
Strada	0.000755865	0	0	0	0	0.0288024	0.00561068	0.00144926
Ccdc47	0	0.00252254	0	0.00259845	0.0181926	0	0.00862663	0
Ftsj3	0.012846	0.000564278	0	0.0177197	0	0	0.0698841	0
Smarcd2	0.091236	0	0	0	0	0.0218956	0.0364315	0.020547
Gh	0.165318	0	0.00818824	0	0	0.0115434	0	0.000225243
Cd79b	1	0	0	0	0	0.087546	0.0901205	0.105892
Scn4a	0.0161181	0	0.00342273	0	0	0.0143148	0	0.00614572
Icam2	0.0749828	0	0.0173351	0.0312836	0	0.157933	0	0
Ern1	0	0	0.234298	0	0.0780297	0.00223098	0	0.0161402
Tex2	0	0.0227372	0	0	0.259358	0	0.023275	0.202142
Pecam1	0.136023	0	0	0	0	0.314712	0.126774	0.191598
Polg2	0	0.0129245	0	0	0.0043971	0	0.0569846	0.0153252
Nol11	0.00601625	0.00965662	0	0.0127481	0	0	0.0505732	0
Pitpnc1	0	0	0.155597	0.19508	0.201587	0.125825	0	0
Cacng1	0.018548	0	0.00365167	0	0	0.0201403	0	0.00461022
Cacng4	0	0	0	0.000971839	0.0042555	0.0112747	0.0165919	0
Cacng5	0.0054888	0	0	0	0	0.00739673	0.0129198	0.00103846
Prkca	0.024379	0	0.0127655	0.0675874	0	0.0562739	0	0
Rgs9	0	0	0	0.0105129	0.0123362	0.00435397	0.00544187	0
Slc16a6	0.00872963	0.011825	0	0.0130767	0	0	0.0143199	0
Wipi1	0	0.0352776	0	0	0.00310885	0	0.0147556	0.0287907
Fam20a	0	0	0	0.0109892	0.00920357	0.0140781	0.00441681	0
1700012B07Rik	0	0	0.0102642	0.0177031	0.00506778	0.0105929	0	0
Abca8b	0.00247129	0	0	0	0	0.0100466	0.0034149	0.0257822
Abca8a	0.00231338	0	0.00382109	0	0	0.00931736	0	0.00718698
Abca9	0.00303289	0	0	0	0	0.00406196	0.0127692	0.0171307
Abca6	0.0285581	0	0	0.00193778	0	0.0155911	0.00318515	0
Abca5	0.000253756	0.00119298	0	0	0	0	0.0200553	0.0111202
BC006965	0.00683907	0	0.000988088	0.00710992	0	0.0109668	0	0
Slc39a11	0	0.0390902	0	0	0.0782098	0	0.12896	0.016509
Fam104a	0.00143789	0	0	0	0	0.00303062	0.0163555	0.00734355
Cpsf4l	0.00250251	0	0.00825455	0	0	0.0124975	0	0.017885
Cdc42ep4	0	0.0118662	0	0	0.0203026	0	0.0217091	0.00424988
Sdk2	0	0.0018543	0	0	0.00363639	0	0.00865302	0.00147371
4932435O22Rik	0	0	0.0136634	0.0201994	0.000559886	0.00835843	0	0
Btbd17	0	0	0.0137439	0	0.00596177	0.005993	0	0.00241912
Cd300lb	0	0.0890443	0	0	0.00158399	0	0.0186086	0.00194804
Cd300c	0.00154671	0.0693026	0	0	0	0	0.0214349	0.044599
Cd300ld	0.0142802	0.367771	0.0188249	0	0	0	0	0.0288155
AF251705	0.00672308	0.66538	0	0	0	0	0.0117846	0.00948091
Cd300e	0	0.0858805	0	0	0.00934765	0	0.00513794	0.00478859
Cd300lf	0.0118498	0.806366	0.0224094	0	0	0	0	0.0242834
Nat9	0	0	0	0	0.0206112	0.00099876	0.0144345	0.0582227
Grin2c	0	0.00139468	0	0.0172495	0.00360519	0	0.000202031	0
Fdxr	0	0	0	0.000309368	0.0153165	0.0222548	0.0184732	0
Fads6	0	0	0	0	0.012691	0.0138997	0.00242523	0.00219277
Ush1g	0	0	0	0.0157388	0.000807046	0.0144092	0.00527649	0
Hid1	0	0	0.253493	1	0.0434135	0.0377003	0	0
Nt5c	0	0.0132877	0.00834333	0	0.024256	0	0	0.00295491
Hn1	0	0.0277156	0	0.0172975	0.00146343	0	0.00555448	0
Gga3	0.0357157	0	0.0298841	0	0	0.0265577	0	0.0117253
Mif4gd	0.111906	0	0	0.00580711	0	0.00560613	0.072489	0
Slc25a19	0.0474467	0	0	0	0	0.0271129	0.0119938	0.00943501
Grb2	0.0252806	0	0	0	0	0.00287491	0.0168335	0.0124261
Caskin2	0.000744358	0	0	0	0	0.0206624	0.0562796	0.0251521
Recql5	0.0838463	0	0	0	0	0.0101691	0.0034932	0.0361839
Galk1	0.0196612	0	0	0	0	0.0144992	0.0353803	0.0354592
Unc13d	0	0	0.0194221	0.0163612	0.0462357	0.158593	0	0
Wbp2	0	0.00648709	0.0788052	0	0.00111028	0	0	0.00244383
Trim47	0	0.0725896	0	0	0.0158776	0	0.0188336	0.00993281
Trim65	0.0452304	0	0.0635095	0.0518891	0	0.00556541	0	0
Mrpl38	0	0	0	0.0433826	0.009357	0.00201744	0.0323084	0
Fbf1	0	0	0	0.00439522	0.02191	0.0045424	0.0085372	0
Evpl	0	0	0.0014768	0.00712998	2.41726e-06	0.0127529	0	0
Srp68	0	0	0.0207536	0.00913433	0.0186487	0.0187955	0	0
Exoc7	0.00637269	0	0	0	0	0.00490208	0.0046708	0.000778512
Foxj1	0	0	0.00825752	0	0.00603207	0.0109822	0	0.000477043
Rnf157	0.0197452	0.000762687	0.131514	0	0	0	0	0.0479711
Qrich2	0	0	0	0.0128054	0.00666673	0.00230124	0.0201663	0
Ube2o	0.0453335	0	0	0	0	0.0220989	0.0430327	0.0367412
Rhbdf2	0.449704	0.0516351	0	0.0546586	0	0	0.100968	0
Cygb	0	0	0	0.0164046	0.01134	0.0050679	0.00256546	0
St6galnac1	0.000570955	0	0	0	0	0.0354272	0.0146344	0.00554309
Mxra7	0	0	0	0	0.0150468	0.0140838	0.00963648	0.00580671
Jmjd6	0	0	0	0	0.00659333	0.00642916	0.000432244	0.000184204
Srsf2	0	0	0	0	0.0061062	0.00670837	0.0440778	0.0143716
LOC100505199	0.0232659	0	0.0246046	0.00885427	0	0.00782174	0	0
Tmc6	0	0	0.00761349	0.0383095	0.000569779	0.0754202	0	0
Tha1	0	0	0	0.00496346	0.0328608	0.00940597	0.00426902	0
Usp36	0.00271651	0	0	0.0212699	0	0.0473658	0.000391778	0
Cyth1	0.068237	0	0	0.00511634	0	0.00140332	0.00524281	0
Timp2	0	0.00366863	0.0075842	0	0.331635	0	0	0.377868
BC100451	0.000810822	0	0.0158645	0	0	0.0267355	0	0.0141415
Lgals3bp	0	0.00758063	0.0425168	0	0.609001	0	0	0.0117647
Cant1	0	0	0	0.00501932	0.00309037	0.00293488	0.0202908	0
Rbfox3	0	0	0.00283895	0.00767983	0.00850763	0.0149365	0	0
Cbx8	0.0180906	0	0.0128626	0	0	0.0181069	0	0.00989721
Cbx4	0.0113304	0	0	0.0178599	0	0.0598997	0.0123295	0
Tbc1d16	0	0	0	0	0.0405387	0.00226972	0.0311854	0.0211848
Eif4a3	0	0.0128861	0	0	0.0267602	0	0.0379987	0.0484197
Nptx1	0.00632295	0	0	0	0	0.0107533	0.00104826	0.00332137
Aatk	0	0.0128864	0	0	0.00474125	0	0.00399981	0.00737899
Mir338	0.0261617	0	0.00579512	0	0	0.00798468	0	0.0159419
Azi1	0.00916625	0	0	0	0	0.00727267	0.0233573	0.00808944
Enthd2	0.00324163	0	0.00231395	0	0	0.0166667	0	0.00320256
2810410L24Rik	0	0	0	0	0.00486849	0.0178746	0.0281498	0.00943705
2310003H01Rik	0	0	0	0	0.00429587	0.00406266	0.0128948	0.00216494
Nploc4	0	0	0	0	0.00452916	0.00410105	0.00536111	0.0145316
Pde6g	0.00584788	0	0	0	0	0.00953181	0.00631943	0.0217747
Oxld1	0.00708618	0	0	0.00399321	0	0.00571531	0.0131136	0
Arl16	0.00407267	0	0	0	0	0.00954292	0.00806835	0.00375909
Fam195b	0	0	0.0349596	0	0.00690496	0.0168955	0	0.012143
Ppp1r27	0	0	0	0	0.0132373	0.00186901	0.0128723	0.00417716
P4hb	0	0.0458801	0	0	0.0321705	0	0.0387381	0.0602068
Arhgdia	0.00182359	0.0153908	0.00808844	0	0	0	0	0.0180725
Alyref	0.000118451	0	0	0	0	0.00404089	0.0410633	0.0300792
Pcyt2	0	0	0	0	0.0118705	0.0149653	0.0420035	0.0413322
Sirt7	0	0	0.00731628	0.0232918	0.00832577	0.0125301	0	0
Mafg	0	0.00498424	0	0	0.00888823	0	0.028924	0.00450281
Pycr1	0	0	0	0	0.00351053	0.0152314	0.0213925	0.0154702
Myadml2	0.0353138	0	0	0	0	0.00879001	0.00916081	0.00993799
Stra13	0	0.0235326	0.0211155	0	0.0149779	0	0	0.00687722
Dcxr	0.00136262	0.00870732	0.071871	0	0	0	0	0.0365399
Cbr2	0	0.0129467	0.0563433	0	0.0122818	0	0	0.00222763
Rfng	0.0180298	0	0.0289261	0	0	0.00717819	0	0.00915297
Dus1l	0.00368498	0	0	0.000429903	0	0.0144844	0.00778567	0
Fasn	0	0	0.015712	0	0.0432729	0.0478697	0	0.0628397
Ccdc57	0.00145384	0	0	0	0	0.00147207	0.0159441	0.00632747
Csnk1d	0	0	0	0	0.0118339	0.0174869	0.00158555	0.0331811
Cd7	0	0	1	0.834964	0.386801	0.185833	0	0
Sectm1b	0.00903797	0	0	0	0	0.0112188	0.00458291	0.0159373
Sectm1a	0.0086981	0	0	0.00796132	0	0.0158939	0.0184448	0
Tex19.2	0.0169986	0	0	0	0	0.0167148	0.00372794	0.020375
BC017643	0.0280618	0	0.000873883	0.0117264	0	0.0077786	0	0
Wdr45b	0	0.0399436	0	0	0.027456	0	0.0293231	0.0128617
Rab40b	0.0157822	0	0	0.00065644	0	0.0136919	0.00907976	0
Zfp750	0.00797488	0	0.0171796	0.00168419	0	0.0108373	0	0
1700012B15Rik	0	0	0	0	0.0122023	0.0278589	0.011199	0.000561379
Asxl2	0.00676326	0	0.031165	0.0285502	0	0.0173632	0	0
Dtnb	0	0	0.0269614	0.00976584	0.0335738	0.0181462	0	0
Dnmt3a	0	0	0	0	0.00367905	0.00994542	0.0484232	0.179929
Dnajc27	0.00757065	0	0	0.0036645	0	0.0324117	0.0107548	0
Ptrhd1	0.00355427	0.00811198	0	0	0	0	0.0481272	0.0102121
Itsn2	0.047951	0.00758904	0.00451118	0.0207723	0	0	0	0
Pfn4	0	0	0	0	0.0157564	0.021245	0.00273439	0.0137014
Gm6682	0	0.00997686	0.0143371	0	0.0609336	0	0	0.0225782
0610009D07Rik	0	0.0287882	0	0.0229948	0.0866172	0	0.0141024	0
BC068281	0.000193626	0	0.0222405	0.00468928	0	0.00912211	0	0
2810032G03Rik	0.00624353	0	0.0039021	0.00439032	0	0.00370091	0	0
Apob	0	0	0	0.0115628	0.0152658	0.00834796	0.00196532	0
1110057K04Rik	0	0.0278824	0.0132792	0.0147963	0.022862	0	0	0
Hs1bp3	0	0.0469702	0	0	0.0103584	0	0.00264963	0.00895084
Pum2	0.0203593	0	0.0039996	0	0	0.0100919	0	0.00507674
Sdc1	0.014876	0	0	0	0	0.0161694	0.00714162	0.0490602
Laptm4a	0	0.121849	0.0116056	0	0.0415709	0	0	0.0215772
Matn3	0	0	0	0.0134282	0.00390049	0.00596196	0.00345405	0
Wdr35	0.0136994	0.00780099	0	0	0	0	0.0126913	0.00212839
Ttc32	0.00847847	0	0	0	0	0.0281779	0.00723952	0.0250337
Osr1	0.0120339	0	0.00412616	0.0155664	0	0.00880156	0	0
Nt5c1b	0	0	0.00650239	0.0214587	0.0153388	0.0123029	0	0
Rdh14	0	0.00969024	0.00723467	0	0.0054067	0	0	0.00334184
Smc6	0	0.014696	0	0	0.0276597	0	0.0230305	0.0200587
Fam49a	0	0	0.0837368	0.227205	0.187958	0.129846	0	0
Gm16497	0.0117387	0	0.013345	0	0	0.0188159	0	0.0131251
Ntsr2	0.00253143	0	0.0100193	0.0104956	0	0.00581478	0	0
E2f6	0	0	0	0	0.042257	0.00311426	0.0159281	0.0162684
Rock2	0.0295532	0.0911409	0	0	0	0	0.0454891	0.0117193
Pdia6	0.000283462	0.0759549	0	0	0	0	0.155202	0.10982
Nol10	0.00463794	0	0	0.0216155	0	0.0277933	0.0498395	0
B430203G13Rik	0.012111	0.018564	0	0.00836522	0	0	0.00803239	0
Gm4983	0	0.0173256	0.0140373	0.008099	0.0103045	0	0	0
5730507C01Rik	0	0.0461461	0	0	0.00602896	0	0.0309884	3.81131e-05
B230354O11Rik	0.0393729	0	0.0176604	0.000320109	0	0.0022159	0	0
Cpsf3	0.0155437	0.00269713	0	0	0	0	0.0170667	0.00294006
Gm9292	0	0	0.0306077	0.0198734	0.0481114	0.00130115	0	0
Taf1b	0.00669199	0	0.0115722	0	0	0.000193314	0	0.00190079
Grhl1	0	0.0215392	0	0	0.0204085	0	0.00923498	0.00123206
Klf11	0	0.0060767	0.0232439	0.00993431	0.00697353	0	0	0
Rrm2	0.0638012	0.0604568	0	0	0	0	0.0422888	0.0861943
Mboat2	0	0	0.00997485	0	0.00154394	0.0153835	0	0.0146552
Kidins220	0.00891491	0.0073518	0.0145501	0.00613423	0	0	0	0
Cmpk2	0.219142	0	0	0	0	0.118467	0.0230313	0.0173512
Rnaseh1	0.00553936	0	0	0.00382803	0	0.00745124	0.0115193	0
Tssc1	0	0	0.00158002	0	0.0146666	0.0126758	0	0.0114395
Myt1l	0	0	0	0.000526243	0.00237265	0.00755472	0.0153765	0
Pxdn	0	0	0	0	0.00201253	0.00284756	0.0117504	0.0104732
Tmem18	0.000272336	0	0	0.010199	0	0.00418882	0.028504	0
Sh3yl1	0.0137184	0	0	0.00257132	0	0.0120664	0.0173793	0
Fam110c	0.0181263	0	0.000997863	0	0	0.00918293	0	0.0228009
Lamb1	0	0	0	0.0171556	0.00135225	0.00411016	0.00101496	0
Slc26a3	0	0	0	0.0146018	0.0111028	0.00511551	0.0063356	0
Ccdc71l	0.0526661	0.0230327	0.0627365	0.0301478	0	0	0	0
Nampt	0	0.120188	0	0	0.0222407	0	0.127914	0.15204
Gdap10	0.0394563	0.0578502	0	0	0	0	0.0911276	0.136687
Sypl	0.00973023	0.113486	0	0	0	0	0.0092624	0.247735
Efcab10	0	0	0.00385657	0.0104241	0.00420395	0.00858965	0	0
Twistnb	0	0	0	0.00867549	0.00218526	0.00204016	0.0152866	0
Ferd3l	0	0	0	0.0294436	0.0202154	0.021628	0.000613328	0
Twist1	0	0	0.0110801	0	0.00494499	0.00826702	0	0.00238419
Prps1l1	0	0	0.00926971	0	0.00508174	0.0104572	0	0.00534826
Snx13	0.0378967	0.0447301	0	0	0	0	0.0385536	0.100988
Agr3	0	0	0.00738905	3.70928e-05	0.0125469	0.00919215	0	0
Agr2	0.000916561	0	0	0	0	0.0145351	0.000108957	0.00684918
Ankmy2	0	0.00901482	0	0.0190902	0.0809613	0	0.0116361	0
Sostdc1	0	0	0	0.00203249	0.0016393	0.00586768	0.00767702	0
Meox2	0	0	0.0197317	0.000635122	0.00152199	0.00869927	0	0
Agmo	0	0.822712	0	0	0.00638085	0	0.00296507	0.00495386
Dgkb	0	0	0	0	0.0156107	0.00809721	0.00498325	0.00439594
Dock4	0	0.394032	0	0	0.0247954	0	0.0654338	0.0272837
Immp2l	0	0	0	0	0.00271938	0.0255499	0.028705	0.00190616
Pnpla8	0.0750764	0.330556	0	0	0	0	0.0432743	0.0287644
Nrcam	0	0	0.0267466	0.00412595	0.00488511	0.00740533	0	0
G2e3	0	0.00542032	0.0209663	0	0.0127813	0	0	0.013954
Scfd1	0	0.00084848	0.00110894	0	0.0121824	0	0	0.00509202
Coch	0	0	0.00366971	0.0267892	0.0097789	0.00298441	0	0
Ap4s1	0	0.00285001	0.022549	0	0.00666007	0	0	0.00297046
Nubpl	0.000746751	0	0	0	0	0.00235471	0.0415433	0.00178171
Arhgap5	0	0.13529	0	0.0351795	0.239932	0	0.161124	0
Akap6	0	0	0	0.00875376	0.0048358	0.00905626	0.00251537	0
1110008L16Rik	0.00615178	0.00985794	0	0	0	0	0.0705452	0.0464362
Psma6	0	0.0308266	0	0	0.0417869	0	0.0544928	0.0577381
Aldoart2	0	0.00412865	0	0.0201904	0.014216	0	0.0021685	0
Insm2	0	0	0	0.00964305	0.000150168	0.0105705	0.00918	0
Brms1l	0	0	0	0	0.0110795	0.020661	0.041974	0.114096
Pax9	0.00261698	0	0	0.0430123	0	0.00852939	0.0193042	0
4921506M07Rik	0	0	0.00571911	0.00891082	0.00523534	0.00508918	0	0
Sstr1	0	0	0	0.0187789	0.00650721	0.00895073	0.00267365	0
Gemin2	0	0	0	0.00668712	0.00363199	0.0314509	0.0262145	0
Pnn	0	0	0	0	0.0162759	0.0343859	0.0130105	0.00397157
Mia2	0	0	0.0347994	0.04319	0.0159342	0.0109168	0	0
Ctage5	0	0.0319135	0	0	0.0361545	0	0.0386321	0.0278472
Lrfn5	0.010544	0	0.023158	0	0	0.0171507	0	0.00564001
Gm527	0	0.0233995	0.172872	0.0217992	0.0715658	0	0	0
Fam179b	0	0.0013712	0.00606667	0.0503109	0.00303458	0	0	0
Fancm	0	0	0.030611	0	0.00507152	0.0230433	0	0.00435609
Wdr20b	0.00731499	0	0.016576	0	0	0.0075083	0	0.00260529
Lrr1	0	0.0011205	0	0	0.0025674	0	0.0158039	0.034657
Mgat2	0	0.0181831	0.00246682	0.0151532	0.0381292	0	0	0
Klhdc1	0	0	0	0.10242	0.0194201	0.00885287	0.0382272	0
Klhdc2	0	0	0.105747	0	0.0550763	0.00450768	0	0.0271841
Atp5s	0	0	0.01303	0.00128342	0.000690235	0.00722803	0	0
4930512B01Rik	0	0	0.0023176	0.0131776	0.00889166	0.00358618	0	0
Atl1	0	0	0	0	0.00666125	0.00920289	0.000847231	0.000775277
Gm3086	0.0191123	0.00767149	0	0	0	0	0.0125066	0.0117997
Abhd12b	0	0	0.00567063	0.00814901	0.00541074	0.00305187	0	0
Tmx1	0	0.0170014	0	0.00284847	0.0246568	0	0.00949692	0
Frmd6	0	0	0	0	0.0283709	0.0605427	0.0584043	0.0142262
Actr10	0	0.0128045	0	0.0187885	0.0445329	0	0.0201098	0
Arid4a	0	0	0	0	0.0250528	0.0265595	0.0174299	0.00462549
Tomm20l	0	0	0.00299349	0.00949021	0.00162616	0.00833762	0	0
2700049A03Rik	0.0238886	0	0.0174626	0	0	0.00672371	0	0.0156538
Dact1	0	0	0	0	0.00425649	0.0145987	0.0150379	0.0187777
Daam1	0	0.222232	0.00356919	0	0.0587991	0	0	0.0406896
Jkamp	0	0.0206273	0.0353488	0	0.00146949	0	0	0.0121329
Lrrc9	0	0	0.00997941	0.0236109	0.00317268	0.0235228	0	0
Pcnxl4	0	0.0179991	0	0.031884	0.0287322	0	0.00787639	0
Ppm1a	0.00896748	0.0134726	0.00159653	0	0	0	0	0.00398875
Six6	0.000245457	0	0	0	0	0.00485987	0.00730284	0.00822121
Mnat1	0	0	0	0	0.0115321	0.00614034	0.0365547	0.0457229
Slc38a6	0.00196204	0.209269	0	0	0	0	0.0073289	0.0124885
Hif1a	0	0.00300281	0	0	0.0140551	0	0.11684	0.010728
Gm5068	0	0.115829	0.0116245	0	0.0381734	0	0	0.0105141
Snapc1	0	0	0	0.0337561	0.0186719	0.00823519	0.00835991	0
Syt16	0	0	0	0.00558776	0.000420448	0.00472275	0.00175221	0
1700086L19Rik	0	0	0.0114056	0	0.00692847	0.0090043	0	0.0094094
Dbpht2	0	0	0.00209719	0.0324478	0.00290474	0.00260017	0	0
Rhoj	0	0.00428472	0.00120431	0.0121062	0.00945741	0	0	0
Mthfd1	0	0.00461526	0	0	0.0181402	0	0.0965248	0.00913786
Akap5	0.0291334	0.22286	0	0.0208784	0	0	0.000788168	0
Zbtb1	0.0282772	0.00423697	0.0180305	0.00474582	0	0	0	0
Hspa2	0.0649446	0	0	0	0	0.00573836	0.000767678	0.0177729
Ppp1r36	0.0185871	0	0	0	0	0.00821022	0.000868329	0.00424534
Plekhg3	0.001565	0.0205602	0	0	0	0	0.000738047	0.0197843
Churc1	0	0	0	0	0.035956	0.00367282	0.0749569	0.0664981
Fntb	0	0	0	0	0.0265976	0.0292711	0.054585	0.0250292
Fut8	0	0	0	0.0228628	0.0428604	0.0582431	0.0154815	0
Gm6657	0	0	0.0283026	0.00711071	0.0036107	0.00607298	0	0
Gphn	0	0.00846892	0	0	0.020185	0	0.0203631	0.0204372
Fam71d	0.00369102	0	0.0185435	0.0147689	0	0.0153005	0	0
Mpp5	0.00817519	0	0	0	0	0.00224543	0.00370169	0.148412
Eif2s1	0	0.0142634	0	0.00242844	0.0277327	0	0.0287797	0
Plekhh1	0.0317418	0	0	0	0	0.0106999	0.00705445	0.0546109
Rdh12	0.173274	0	0	0.0254127	0	0.0638284	0.00638232	0
Rad51b	0	0.00308476	0	0	0.00809984	0	0.0645326	0.0618946
Exd2	0	0.000122156	0	0.0213046	0.00388949	0	0.0187546	0
Galnt16	0	0	0	0.0112484	0.00866056	0.0151244	0.00335601	0
Slc39a9	0.0138883	0.00584396	0.00360793	0.000958718	0	0	0	0
Plekhd1	0.00542931	0	0.00992049	0	0	0.00828219	0	0.00267502
Smoc1	0.00457551	0	0	0	0	0.0131784	0.0126016	0.00555462
Ttc9	0	0	0	0	0.00326969	0.00997843	0.000869257	0.0025109
Pcnx	0.00869169	0.0181092	0.00206383	0	0	0	0	0.0860857
Sipa1l1	0	0	0.00500304	0	0.00786316	0.0484559	0	0.0583537
Rgs6	0	0	0.000445878	0	0.000444504	0.010819	0	0.00611213
Dcaf4	0.0134182	0	0	0	0	0.0220789	0.0164934	0.00626204
Psen1	0	0.0189299	0.0109703	0	0.0157175	0	0	0.00574523
Papln	0	0	0	0.00641759	0.00221968	0.00641168	0.0105547	0
Acot2	0.00989593	0.110967	0	0.0151785	0	0	0.0130015	0
Acot1	0	0.225334	0	0	0.0139583	0	0.0255744	0.0825903
Acot4	0	0.0800862	0	0	0.00608659	0	0.00305481	0.0297377
Acot3	0.00123216	0	0.00444127	0.0207983	0	0.00318878	0	0
Acot5	0	0	0.00754182	0.00996866	0.0190822	0.0168943	0	0
Acot6	0	0	0	0.000630019	0.0144346	0.0277487	0.023543	0
Dnal1	0	0	0	0	0.0273213	0.0179876	0.00107217	0.0141334
Ptgr2	0.0287244	0.00695217	0.00498697	0	0	0	0	0.00823556
Zfp410	0.0146208	0	0.00284894	0	0	0.0152746	0	0.0142793
Coq6	0.00653561	0	0	0	0	0.0158087	0.0250932	0.024572
Ccdc176	0.0126446	0	0	0.0133055	0	0.0225332	0.00554874	0
Rnf113a2	0.0047951	0	0	0	0	0.00917713	0.0198331	0.012075
Lin52	0	0	0	0.0179765	0.0019046	0.00502041	0.00962844	0
Vsx2	0	0	0.0172135	0.0144176	0.00403357	0.00687109	0	0
Vrtn	0	0	0	0.00794596	0.00751834	0.00227861	0.0207907	0
Isca2	0	0.000234531	0	0.0210263	0.00583721	0	0.00346338	0
Fcf1	0	0.0244756	0	0	0.0356818	0	0.0432265	0.00427007
Ylpm1	0.00202261	0	0	0	0	0.0153664	0.00305335	0.0199324
Dlst	0	0.016897	0	0	0.0214956	0	0.00375739	0.000195885
Eif2b2	0	0	0	0	0.0144488	0.00261573	0.0249257	0.0326876
Zc2hc1c	0	0.00036727	0	0	0.002793	0	0.0173311	0.0158009
Fos	0	0.526632	0	0	0.109825	0	0.272886	0.207309
Jdp2	0	0	0.0261601	0	0.0364968	0.00465786	0	0.0454065
Batf	0	0.0176289	0.0248987	0.023361	0.0728209	0	0	0
Mfsd7c	0	0.931477	0.00388511	0	0.005989	0	0	0.00450569
Ttll5	0.0214379	0.0349456	0.00629495	0	0	0	0	0.00638756
Ift43	0	0.0158971	0.00607139	0.00204567	0.00222127	0	0	0
Gpatch2l	0.0437052	0	0.00996497	0	0	0.0186156	0	0.0187204
Esrrb	0.000934105	0	0	0.00356867	0	0.00356039	0.0176565	0
Vash1	0	0.00762299	0	0	0.0180716	0	0.0015767	0.0252113
Gm6772	0	0	0.00641256	0.0103397	0.00190561	0.0165832	0	0
2310044G17Rik	0	0	0.0918427	0.13012	0.00192538	0.0358245	0	0
Tmem63c	0.00917386	0	0.0230877	0	0	0.00848689	0	0.00316512
Ahsa1	0	0	0	0	0.0219435	0.00266999	0.0275349	0.00990263
Gm1995	0.0138603	0	0.0151377	0.0042048	0	0.0158652	0	0
Gm8587	0.00208273	0	0	0	0	0.00512062	0.00330986	0.00596647
Nrxn3	0.000600255	0	0.00650724	0.00539348	0	0.0038333	0	0
Tshr	0.00305862	0	0.0063452	0.00197838	0	0.0119506	0	0
Flrt2	0	0	0	0	0.00511319	0.00351368	0.0158261	0.0225005
Gpr65	0	0	0.114626	0.0396855	0.219629	0.19792	0	0
Spata7	0.0188762	0.000607524	0	0	0	0	0.0156977	0.0461333
Ttc8	0	0.0170133	0	0	0.0287529	0	0.0358127	0.0345953
Tdp1	0.0141091	0.010265	0	0	0	0	0.0412328	0.00790001
Kcnk13	0.0162697	0	0.00136053	0.0217283	0	0.0142742	0	0
Calm1	0.00107255	0.010367	0	0.0208708	0	0	0.0059927	0
9030617O03Rik	0	0.036865	0.0346752	0	0.13653	0	0	0.132616
Catsperb	0	0	0.00309421	0.000604267	0.00423694	0.00459592	0	0
Cpsf2	0.123156	0.00555388	0	0.00539745	0	0	0.0690151	0
Slc24a4	0	0	0.00479207	0	0.00716252	0.00517534	0	0.00522924
Rin3	0	0.0322288	0.144378	0	0.00646895	0	0	0.0647665
Golga5	0.0111407	0.0124477	0	0	0	0	0.0424782	0.00704494
Chga	0	0	0.00219174	0.000239025	0.00246176	0.00152978	0	0
Tmem251	0	0.00875281	0.00781362	0	0.00699707	0	0	0.0100274
Ubr7	0	0	0	0	0.0258505	0.00417175	0.0108502	0.00506388
Cox8c	0.00987393	0	0.00473466	0.00153371	0	0.00305141	0	0
Unc79	0.00596531	0	0	0.00956755	0	0.0102557	0.00580822	0
Fam181a	0.0274347	0	0.00103677	0.0223192	0	0.0144152	0	0
Otub2	0.173268	0	0.0265529	0	0	0.0177052	0	0.00272147
Ifi27l1	0	0.00944939	0	0.00277527	0.0215921	0	0.0208286	0
Ppp4r4	0	0	0.0156582	0	0.00672182	0.0142582	0	0.0134697
Serpina4-ps1	0.0145455	0	0.0228012	0.00258392	0	0.00279005	0	0
Serpina5	0.0126731	0	0	0	0	0.00409414	0.00773032	0.0106338
Serpina3a	0	0	0	0.012283	0.00363879	0.00238685	0.0105778	0
Serpina3b	0.00808985	0	0.0168198	0	0	0.0109273	0	0.0155734
Serpina3m	0.000430278	0	0.000743585	0.00127758	0	0.000842464	0	0
Serpina3n	0.00972719	0.00145691	0	0	0	0	0.00522491	0.0117508
Glrx5	0	0.00372184	0	0.00256736	0.0251247	0	0.0342827	0
Tcl1b2	0.0465301	0	0.0121875	0	0	0.0190321	0	0.0124944
Tcl1b1	0	0	0	0.00145831	0.00267865	0.00918229	0.0202232	0
Tcl1b5	0	0	0.0251761	0	0.00100665	0.0113179	0	0.000137027
Tcl1b3	0.00745963	0	0.0186735	0	0	0.0121496	0	0.0132951
Tcl1b4	0	0	0	0.0292778	0.00559847	0.00156042	0.0154914	0
Bdkrb2	0	0	0	0.0134952	0.00515583	0.0018008	0.0215297	0
Bdkrb1	0.00584985	0	0.00692569	0	0	0.00940212	0	0.0208333
Gskip	0	0.048869	0.000347133	0.0017619	0.0275432	0	0	0
Ak7	0.00169513	0	0.00094368	0.00223515	0	0.00695836	0	0
Papola	0.0121962	0.00528615	0.00442214	0.000845109	0	0	0	0
Vrk1	0.00719809	0.0390961	0	0	0	0	0.137065	0.0048493
Ccnk	0.00614288	0	0.0348412	0	0	0.0265181	0	0.0542437
Hhipl1	0	0	0	0	0.0194483	0.0148662	0.00824312	0.00523962
Cyp46a1	0	0	0	0	0.00399931	0.00360292	0.0066179	0.0114975
Eml1	0.00295292	0	0	0	0	0.00752143	0.0048862	0.000879512
Evl	0	0.0432274	0.0362071	0.0565686	0.0320392	0	0	0
Mir342	0.00176747	0.0332052	0.137924	0.051244	0	0	0	0
Yy1	0.000204473	0	0	0	0	0.0072959	0.00896053	0.00289811
Mir345	0.0155064	0	0.0131436	0	0	0.000612237	0	0.00252451
Slc25a47	0.00184857	0	0	0.00965931	0	0.00684222	0.0246932	0
Dlk1	0.00940835	0	0	0.00526194	0	0.0151929	0.00672886	0
Meg3	0	0	0.00917301	0.0264971	0.00126737	0.00546901	0	0
Mir673	0.0038658	0	0	0	0	0.00455922	0.00435095	0.00935649
Mir337	0	0	0.0185803	0	0.00253856	0.000989646	0	0.0236229
Mir540	0.00443663	0	0	0.0113756	0	0.00368116	0.0187712	0
Mir665	0.015761	0	0.0247116	0	0	0.0252971	0	0.0068107
Mir341	0	0	0	0.00409232	0.0108526	0.0105994	0.0485686	0
Mir370	0.00657247	0	0.0101763	0	0	0.00847472	0	0.00166094
Rian	0	0	0	0	0.000253561	0.00274454	0.0139736	0.00181522
AF357355	0.00322337	0	0	0.021986	0	0.0112942	0.0184141	0
AF357341	0	0	0	0	0.00783981	0.0113986	0.0139772	0.00301376
Mir379	0	0	0.00774164	0.0332748	0.00223949	0.0157064	0	0
Mir411	0.0100778	0	0.0627036	0.0147982	0	0.0169372	0	0
Mir299	0	0	0.0123674	0.0148656	0.0106547	0.0198865	0	0
Mir380	0	0	0.0120203	0.0201616	0.0121018	0.013344	0	0
Mir323	0	0	0.00859421	0.0106939	0.00167251	0.0134253	0	0
Mir329	0	0	0.0269129	0	0.00915352	0.0225236	0	0.0167151
Mir494	0	0	0.00725603	0	0.000392601	0.00712523	0	0.0127448
Mir679	0.0294445	0	0	0	0	0.000189692	0.0081478	0.0215369
Mir666	0	0	0	0	0.0107419	0.0159183	0.000939942	0.00741704
Mir543	0	0	0.00794338	0.0271071	0.00684534	0.0118798	0	0
Mir495	0.0031877	0	0.0176309	0.0104331	0	0.0121597	0	0
Mir667	0.00161456	0	0	0.00283382	0	0.0150373	0.00063769	0
Mir376c	0.00432899	0	0.00490545	0.00168515	0	0.0133689	0	0
Mir376b	0	0	0.0414738	0.0709282	0.00544069	0.0124687	0	0
Mir376a	0	0	0.004891	0	0.0117033	0.0160764	0	0.000246971
Mir300	0.0193705	0	0.0203057	0	0	0.0143814	0	0.00717304
Mir381	0	0	0	0.0231692	0.0135178	0.0145158	0.00533196	0
Mir487b	0	0	0.00981592	0	0.00223315	0.0130332	0	0.00640516
Mir539	0	0	0.0172824	0.0181139	0.00706014	0.0145252	0	0
Mir382	0.00784907	0	0.0085501	0	0	0.0156897	0	0.00731396
Mir134	0.0114492	0	0	0.027703	0	0.00321898	0.0120852	0
Mir668	0	0	0.0155595	0.013835	0.00845708	0.019424	0	0
Mir485	0	0	0.00385071	0.0019519	0.00198598	0.0147057	0	0
Mir154	0	0	0.015611	0.00827878	0.00765034	0.0115613	0	0
Mir496	0.00886561	0	0.0310221	0	0	0.0115121	0	0.0105872
Mir377	0	0	0.015588	0	0.00379208	0.0109766	0	0.0054013
Mir541	0	0	0.0371835	0.00228054	0.0224406	0.0132391	0	0
Mir409	0	0	0.0435564	0.0175914	0.022671	0.0120132	0	0
Mir412	0.0100379	0	0.0232234	0.00835009	0	0.017551	0	0
Mir369	0.0132106	0	0.0419952	0	0	0.0179762	0	0.00421045
Dio3	0.00746424	0	0	0	0	0.00263057	0.0248308	0.0174715
Dync1h1	0	0.0130557	0	0	0.029192	0	0.00994064	0.00321249
Wdr20a	0	0	0.0300054	0.0197867	1.15403e-05	0.0192658	0	0
Zfp839	0	0.0104553	0	0	0.00588883	0	0.0784042	0.0180071
Tecpr2	0	0.0132611	0	0	0.00361871	0	0.0296805	0.0152973
Rcor1	0.0712879	0	0	0	0	0.00732867	0.0010735	0.0121683
Traf3	0.100705	0	0	0	0	0.0535842	0.0125899	7.43784e-05
Amn	0.000700681	0	0	0.0102509	0	0.0170744	0.00581648	0
Tnfaip2	0	0.914199	0	0	0.0132567	0	0.0134883	0.00872349
Eif5	0	0	0	0.0197034	0.0452434	0.00385072	0.0228009	0
Snora28	0	0.0272534	0	0.156359	0.114194	0	0.0872379	0
Mark3	0.0552179	0	0	0	0	0.0111921	0.00594314	0.0309197
Trmt61a	0	0	0	0.00180277	0.00124771	0.0268116	0.0695671	0
Apopt1	0	0.0212365	0	0	0.0103078	0	0.0292533	0.0428229
Klc1	0.0164577	0.0349362	0	0	0	0	0.0274589	0.02598
Zfyve21	0.0230395	0.00808983	0	0	0	0	0.020752	0.0491087
Tdrd9	0.00355928	0	0.00656859	0.00816339	0	0.0160638	0	0
Aspg	0	0	0	0	0.00560844	0.00733717	0.0195849	0.00661702
Mir203	0	0	0.00272081	0.0180244	0.00099228	0.0150879	0	0
Kif26a	0	0	0	0	0.0034354	0.0103204	0.00957419	0.0234664
A530016L24Rik	0	0	0	0	0.0129019	0.014644	0.000886471	0.00336833
Inf2	0.0108876	0.0321801	0	0	0	0	0.00440504	0.00170435
Adssl1	0.324963	0	0.0057418	0	0	0.00477945	0	0.210051
Zbtb42	0	0.0030524	0	0.00515357	0.0383489	0	0.00221076	0
Cep170b	0	0.00282064	0	0.0101134	0.0145107	0	0.0787788	0
Pld4	1	0.624375	0	0	0	0	0.214956	0.134556
BC022687	0	0.00473628	0	0.00470689	0.00743498	0	0.0218585	0
Btbd6	0	0	0	0.0134147	0.0158734	0.0368298	1.07577e-05	0
Pacs2	0	0	0	0	0.0463075	0.000303952	0.0426577	0.0269293
Tex22	0.00773881	0	0.00259298	0	0	0.0176404	0	0.0106931
Mta1	0	0	0.0126744	0	0.0791177	0.0733599	0	0.0183061
Crip2	0	0.0233506	0	0.0228585	0.0196894	0	0.0240792	0
Crip1	0	0	0	0.0633572	0.0491157	0.0556648	0.0260877	0
4930427A07Rik	0.0245734	0	0	0	0	0.0281735	0.0177675	0.0427034
Tmem121	0	0	0	0	0.000155666	0.0130311	0.0111689	0.0162645
Zfp386	0	0	0.00146996	0.0407151	0.0272791	0.0356413	0	0
Vipr2	0	0	0.0149937	0	0.00098315	0.0197821	0	0.00105025
Esyt2	0	0.00972675	0.0810959	0.121787	0.124668	0	0	0
Ncapg2	0.0120459	0.054567	0	0	0	0	0.258158	0.770586
Ptprn2	0	0	0.0100262	0	0.00168777	0.0136302	0	0.00469792
Mir153	0.00981095	0	0.00541371	0	0	0.0118418	0	0.0177074
Rapgef5	0.270091	0	0	0	0	0.00993135	0.0779791	0.0151817
Sp8	0	0	0.0230713	0	0.0186964	0.0171182	0	0.0202823
Macc1	0	0	0.00444643	0.00875673	0.0138524	0.00773264	0	0
Rab10	0	0.00353714	0	0.004135	0.0170725	0	0.00622083	0
Efr3b	0	0	0	0.00424533	0.00614745	0.0211681	0.00243543	0
Ncoa1	0.0847895	0.0838006	0.0285615	0	0	0	0	0.00469041
Fam228a	0	0	0	0.00662937	0.00162114	0.0163167	0.00246662	0
Fam228b	0	0	0.000295393	0	0.00306555	0.0213198	0	0.00595553
Fkbp1b	0.00220431	0.118763	0.000383072	0.00164376	0	0	0	0
Mfsd2b	0	0	0	0	0.00129866	0.00606691	0.00194879	0.00721006
Klhl29	0.00376354	0	0	0.000839284	0	0.00263504	0.00509066	0
Gdf7	0.00661671	0	0.00540936	0.00289449	0	0.0115042	0	0
Rhob	0	0.293884	0.00014616	0	0.118791	0	0	0.151374
Slc7a15	0	0	0.00548367	0	0.00915267	0.00400526	0	0.0056372
Kcns3	0.0034659	0	0.00598736	0.00671041	0	0.00894439	0	0
Msgn1	0	0	0.00275959	0	0.0019381	0.0158419	0	0.0197681
Gen1	0.0711442	0	0	0	0	0.000630854	0.106352	0.0596087
Vsnl1	0	0	0	0.00249876	0.0175871	0.00352538	0.0120918	0
Mycn	0	0	0	0.0116059	0.0118221	0.017224	0.00795553	0
Snord118	0	0	0	0.00603873	0.0662893	0.0340923	0.0724376	0
Ddx1	0	0.0349487	0	0	0.0359093	0	0.0670457	0.00687986
Fam84a	0	0	0	0	0.00403747	0.0085236	0.00185689	0.0024621
Trib2	0.486605	0	0	0.0270124	0	0.0765475	0.194773	0
Lpin1	0	0.285925	0.432595	0.317081	0.26248	0	0	0
Greb1	0	0	0.0199684	0.00295705	0.00520688	0.00200071	0	0
Pqlc3	0	0.257616	0.0387252	0	0.0116901	0	0	0.0131867
Kcnf1	0.00206346	0	0	0.0246657	0	0.00821742	0.0106388	0
Atp6v1c2	0	0	0.00349269	0.00753046	0.00403677	0.00824919	0	0
G730007D18Rik	0.0236278	0.11718	0.0307367	0.0118103	0	0	0	0
Itgb1bp1	0.0151216	0.0120984	0.00727097	0.0100602	0	0	0	0
Adam17	0.0173365	0.0619802	0.0110181	0	0	0	0	0.00302765
F630048H11Rik	0.000674228	0	0.110014	0.124415	0	0.0249111	0	0
Cys1	0	0.000656488	0.0103563	0	0.00109237	0	0	0.00761399
Id2	0	0.0357526	0.633069	0.559992	0.884227	0	0	0
Rnf144a	0	0	0	0	0.0163586	0.134239	0.149751	0.00770106
Rsad2	0	0	0	0	0.0584569	0.0685671	0.0879031	0.0258148
Sox11	0.00734486	0	0.0078884	0.0211483	0	0.00179809	0	0
Dcdc2c	0	0	0.00926205	0.00482761	0.00764552	0.01738	0	0
Allc	0	0	0.00737163	0	0.006686	0.00520398	0	0.00133416
Colec11	0	0	0.00464268	0.00795976	0.00562762	0.0187885	0	0
Trappc12	0.00677915	0	0	0	0	0.0143109	0.0342846	0.0129365
Tpo	0.000623983	0	0.0150483	0.050448	0	0.00841385	0	0
Sntg2	0	0	0	0.0111153	0.00973562	0.00100406	0.0116128	0
Dld	0	0.0883609	0	0	0.00964296	0	0.0306903	0.0372106
Cbll1	0.0133238	0	0.037328	0.00427588	0	0.0138792	0	0
Slc26a4	0	0	0.00379753	0	0.000492133	0.00799794	0	0.0216622
Bcap29	0	0.0778969	0	0	0.0485227	0	0.0173361	0.00130896
Dus4l	0.00155201	0	0	0.0783834	0	0.0136915	0.101084	0
Gpr22	0.00710635	0	0.0119066	0.00901907	0	0.0125993	0	0
Prkar2b	0	0.706936	0	0	0.0175396	0	0.173143	0.138056
Pik3cg	0.0554775	0.0248325	0.0263782	0	0	0	0	0.00373622
Cdhr3	0	0	0	0	0.012653	0.00102492	0.00306289	0.00463859
F730043M19Rik	0	0.0335563	0	0.0655409	0.0385264	0	0.0170377	0
Hdac9	0.889571	0.0192219	0	0	0	0	0.0667295	0.0866522
Mir680-3	0.039206	0	0	0	0	0.000151069	0.0121395	0.0184715
Ahr	0	0	0	0	0.0756251	0.0842847	0.0892459	0.216869
Tspan13	0	0	0	0	0.0335238	0.496864	0.0858246	0.0494942
Bzw2	0	0.112289	0	0.0225027	0.0499869	0	0.116235	0
Lrrc72	0	0	0.00407566	0	0.00393016	0.00911165	0	0.0027939
Arl4a	0	0	0.00894406	0.0314339	0.0462801	0.0643927	0	0
Scin	0	0	0	0	0.00184565	0.0207311	0.00445072	0.00160517
Lsmem1	0.0152887	0.0578886	0	0	0	0	0.0206845	0.0133066
Zfp277	0	0.0226514	0	0	0.0198496	0	0.0222409	0.0204634
Lrrn3	0.0138961	0	0	0.00737743	0	0.0147742	0.0259065	0
Dnajb9	0	0.158097	0	0.0087996	0.0754451	0	0.0212287	0
Stxbp6	0	0	0	0	0.00433334	0.0117817	0.00102543	0.0167346
Prkd1	0	0	0	0	0.00271233	0.013228	0.00539722	0.0283691
Strn3	0	0	0	0	0.0113487	0.000696429	0.00985014	0.0312687
Heatr5a	0	0.0928368	0	0	0.0258191	0	0.0820363	0.0109253
Dtd2	0	0.00391356	0	0.0422564	0.0167541	0	0.00556624	0
Gpr33	0	0.0485315	0	0.00634815	0.000859798	0	0.00345005	0
Egln3	0	0	0	0	0.0351278	0.0536913	0.100394	0.115598
Sptssa	0	0.0225726	0.0191909	0	0.0617339	0	0	0.0506065
Eapp	0	0.0104548	0	0	0.0074438	0	0.010961	0.00606755
Snx6	0	0.0264159	0	0	0.0244678	0	0.0403523	0.0112357
Cfl2	0	0	0	0	0.0103357	0.00794523	0.020462	0.00911562
Baz1a	0.0442218	0.14677	0.000345227	0	0	0	0	0.00574097
2700097O09Rik	0	0.00945053	0	0.00890827	0.0333992	0	0.0367735	0
Ppp2r3c	0	0.0435005	0	0.000981467	0.0185172	0	0.0102248	0
Nfkbia	0.0327674	0	0	0	0	0.0446765	0.053705	0.0333498
Mbip	0	0	0	0.0108936	0.00636953	0.00812704	0.00727392	0
Nkx2-1	0	0	0	0.0105385	0.00428785	0.00275714	0.00120843	0
Nkx2-9	0	0.00076523	0	0.0154538	0.015774	0	0.0191002	0
Slc25a21	0	0	0.000151957	0	0.0129006	0.0148549	0	0.00211367
Gm2568	0.00595261	0	0.000413987	0.00421484	0	0.00556456	0	0
Foxa1	0	0.00520648	0	0.00481553	0.0238479	0	0.0023896	0
Clec14a	0	0.00334783	0	0	0.0148152	0	0.0098532	0.0130011
Sec23a	0.00095587	0.00560883	0	0.00780517	0	0	0.00636255	0
Trappc6b	0	0.00892951	0.0119666	0.0134989	0.00785953	0	0	0
Fbxo33	0.020563	0	0.00377583	0.0201708	0	0.0271944	0	0
Fscb	0.00186537	0	0	0.0051349	0	0.0108113	0.0173552	0
Klhl28	0.0108509	0.00895516	0.0619776	0.0853907	0	0	0	0
Mis18bp1	0.0303504	0.0650998	0	0	0	0	0.078328	0.29352
Rpl10l	0	0.013517	0	0.0150646	0.0266925	0	0.0274907	0
Pole2	0.00350323	0.00168679	0	0	0	0	0.0241984	0.0198961
Nemf	0.00278594	0	0	0.00965546	0	0.00159067	0.0451144	0
Mettl21d	0	0	0.0192056	0.00310323	0.027234	0.0622572	0	0
Sos2	0	0	0.158549	0.0434325	0.0193029	0.00424185	0	0
Cdkl1	0.418453	0	0	0	0	0.00969386	0.00988406	0.00455813
Mir681	0.0354113	0	0.000339617	0	0	0.0128268	0	0.00803058
Map4k5	0.0558651	0.00519527	0	0	0	0	0.0226907	0.183812
Sav1	0.1513	0.0750517	0.0125849	0	0	0	0	0.0151293
Pygl	0	0.823542	0.00806792	0	0.0337264	0	0	0.0693365
Trim9	0	0	0	0.00675187	0.00466965	0.00945384	0.0176157	0
Timm9	0.000610091	0.0125902	0	0.0115226	0	0	0.0297321	0
Gpr135	0	0.00159638	0	0.0103923	0.00935999	0	0.000535858	0
L3hypdh	0	0	0.0120458	0.00951206	0.0162897	0.00614271	0	0
Ccdc175	0	0	0.0224734	0	0.00569882	0.0147092	0	0.00792457
Rtn1	0	0	0	0	0.000342675	0.0133518	0.0292787	0.0111136
Dhrs7	0	0.0595944	0.0660269	0.126056	0.135691	0	0	0
4930447C04Rik	0	0	0.0151774	0	0.00969003	0.0102293	0	0.00229469
Six1	0	0	0.00724616	0	0.00685825	0.00321013	0	0.00159487
Six4	0	0	0	0.00362209	0.023517	0.0052709	0.0281569	0
Trmt5	0.00362635	0.0111393	0	0	0	0	0.0420484	0.00574668
Tmem30b	0	0.0621597	0	0.00942961	0.0081394	0	0.0105329	0
Kcnh5	0	0	0.00431894	0.00502505	0.00064671	0.00774755	0	0
Gphb5	0	0	0.0163148	0.0181274	0.0179364	0.0106895	0	0
Ppp2r5e	0.00455395	0	0.00982659	0.0103834	0	0.008528	0	0
Sgpp1	0.0076811	0.0110983	0.00886236	0.00579339	0	0	0	0
Esr2	0.000169157	0	0	0.0152146	0	0.00686696	0.0170287	0
Tex21	0.00807035	0	0	0.016647	0	0.00840592	0.00876916	0
Zbtb25	0	0	0.0239079	0.0485272	0.0522544	0.0663728	0	0
Sptb	0	0	0	0	0.0171893	0.0165602	0.0158957	0.00365667
Gpx2	0.00372598	0	0	0.0681756	0	0.0244703	0.00354776	0
Rab15	0	0	0.00368355	0	0.00451919	0.00582079	0	8.47861e-06
Max	0	0	0	0	0.0108127	0.0333934	0.00604012	0.0417499
Atp6v1d	0	0.0371537	0.00608995	0	0.0326627	0	0	0.033523
Plek2	0	0	0.00489275	0.0150705	0.000585488	0.00261325	0	0
Rdh11	0	0	0	0	0.031724	0.014619	0.0160431	0.00528755
Zfyve26	0.116537	0.0456098	0.00565037	0	0	0	0	0.01199
Zfp36l1	0.0802512	0	0	0	0	0.203374	0.0274003	0.0602679
Actn1	0	0.12916	0	0	0.415653	0	0.501278	0.125786
Dcaf5	0.00794883	0	0.0930719	0.0161588	0	0.0205653	0	0
Erh	0	0.014586	0	0	0.0189018	0	0.146346	0.224149
Ccdc177	0	0	0	0.0456014	0.0233352	0.00656034	0.0194188	0
Slc10a1	0	0	0.0433016	0.0104051	0.00694345	0.0119695	0	0
Slc8a3	0.00778276	0	0	0.0120499	0	0.00599379	0.00162162	0
Cox16	0	0.00468334	0	0.00446896	0.024835	0	0.0119147	0
Gm4787	0	0	0	0	0.00358073	0.0130762	0.0120141	0.0354272
Adam4	0.010512	0	0	0.0045806	0	0.0111585	0.013803	0
Adam21	0	0	0	0	0.0115571	0.00820616	0.00694226	0.0104924
Med6	0	0.0059066	0	0.00988615	0.0071373	0	0.0365493	0
Map3k9	0.022553	0	0	0	0	0.0140939	0.0226927	0.0240709
Dpf3	0.000799956	0	0.0107658	0	0	0.0100943	0	0.000129156
Zfyve1	0.00505914	0.00598191	0	0	0	0	0.00241578	0.0118
Numb	0	0.0404324	0	0	0.0226243	0	0.00552727	0.00407358
4732463B04Rik	0	0.00445329	0.0214779	0	0.00277464	0	0	0.0147547
Pnma1	0.00493586	0	0	0.00772641	0	0.0142396	0.0113344	0
Elmsan1	0.0869445	0	0.0081159	0.00413896	0	0.0212137	0	0
Fam161b	0.0130559	0	0.0120664	0	0	0.0173007	0	0.0205821
Entpd5	0.0260089	0	0	0.0600499	0	0.0732287	0.0680551	0
Aldh6a1	0	0.0490491	0.0217822	0	0.0324881	0	0	0.0118145
Abcd4	0	0.00219475	0.0027892	0.00116126	0.00407686	0	0	0
Syndig1l	0	0	0	0	0.0016398	0.00540829	0.0166689	0.00436382
Npc2	0	0.0459937	0	0	0.0784892	0	0.0356009	0.0515618
Ltbp2	0	0	0	0.0199885	0.000455934	0.0113406	0.00951821	0
Arel1	0.0530825	0	0.102936	0	0	0.0248599	0	0.0065605
Prox2	8.53363e-05	0	0	0.0392654	0	0.0196149	0.00129096	0
Rps6kl1	0	0	0	0	0.00509132	0.00635066	0.00371238	0.0152149
Pgf	0	0.00100063	0.0153407	0.0162805	0.0130292	0	0	0
Mlh3	0	0.0187109	0	0	0.0589883	0	0.111162	0.00077712
Acyp1	0	0	0	0	0.0146968	0.0154209	0.021324	0.00761286
Nek9	0.0149206	0.0120985	0.00119593	0	0	0	0	0.00716363
0610007P14Rik	0	0	0	0	0.0256642	0.0180021	0.00302207	0.0113103
Tgfb3	0	0	0.130356	0	0.00465139	0.023492	0	0.00906581
Angel1	0	0	0	0	0.0163968	0.00905663	0.00244581	0.00379188
Irf2bpl	0	0	0.18313	0.0414944	0.0418144	0.0353799	0	0
Ngb	0.00855766	0	0	0	0	0.00426537	0.0161014	0.0182244
Pomt2	0	0.0158971	0	0	0.00472646	0	0.000610843	0.0150421
Tmed8	0.125974	0	0.0496472	0.004091	0	0.0237353	0	0
Noxred1	0.0420475	0	0	0	0	0.0184341	0.00264922	0.00204758
Vipas39	0	0.000113755	0	0	0.0121934	0	0.0443795	0.0216758
Sptlc2	0	0.12976	0.0302021	0.00328089	0.0066451	0	0	0
Snw1	0.0009213	0	0	0.00437812	0	0.0107216	0.0168255	0
Gm16381	0	0.0249735	0	0	0.042256	0	0.0427449	0.0104728
Gm5662	0.0280082	0	0.0307837	0.0233105	0	0.00355847	0	0
Gm5039	0.000993368	0.0106274	0	0	0	0	0.00974209	0.013001
Dio2	0.00833781	0	0.000334748	0.0121678	0	0.0151295	0	0
Cep128	0.148667	0.0154864	0	0	0	0	0.0297573	0.0348944
Gtf2a1	0.0181698	0	0	0.00283617	0	0.0007447	0.00694456	0
Ston2	0	0	0	0	0.0391686	0.0328827	0.0260716	0.0386212
Sel1l	0	0.0830296	0	0	0.00894726	0	0.00590479	0.00759586
1700019M22Rik	0.0063717	0	0	0	0	0.0079834	0.0028636	0.0555995
Galc	0	0.135873	0	0	0.123114	0	0.000806064	0.0557761
Kcnk10	0.0630174	0	0.0184986	0.00389898	0	0.0096194	0	0
Ptpn21	0.00201688	0.018348	0.00567146	0	0	0	0	0.000580174
Efcab11	0.00854928	0.0123739	0	0	0	0	0.00744995	0.0233169
Nrde2	0.0036592	0	0	0	0	0.0169847	0.0294283	0.00710272
Ttc7b	0	0.0280198	0.134274	0.118117	0.0518658	0	0	0
Rps6ka5	0.017808	0.0697647	0.0267714	0	0	0	0	0.267796
Tc2n	0	1	0.0194558	0.0289271	0.0201173	0	0	0
Fbln5	0	0	0	0.00371397	0.00638556	0.00417016	0.0140163	0
Trip11	0	0.00710504	0.0323523	0.050385	0.0336542	0	0	0
Atxn3	0.0191325	0.0379391	0	0	0	0	0.000363244	0.00514219
Lgmn	0.147948	0.283305	0	0	0	0	0.596638	0.841894
Itpk1	0	0	0.0855808	0	0.0511912	0.0196584	0	0.00404912
Btbd7	0.0154896	0	0.0365523	0	0	0.00891964	0	0.00238521
Prima1	0	0	0.00622013	0.014888	0.000883008	0.0121181	0	0
Asb2	0	0	0.0755319	0	0.00436858	0.0357341	0	0.00374194
Ddx24	0	0	0	0.0263977	0.00388728	0.00554826	0.0181317	0
Ifi27l2a	0.0760048	0	0	0	0	0.164249	0.306039	0.173402
Ifi27l2b	0.015609	0	0	0	0	0.00484093	0.00131674	0.00416475
Serpina10	0.00261289	0	0	0.0185616	0	0.010331	0.0046551	0
Serpina6	0.0189907	0	0.00493004	0.0150241	0	0.00652507	0	0
Serpina1f	0	0	0.00159587	0	0.00509883	0.0103312	0	0.0024038
Serpina1b	0.0267317	0	0.0211339	0	0	0.0214707	0	0.0208121
Serpina1d	0.00192471	0	0.00234893	0.0574831	0	0.0148552	0	0
Serpina1c	0.00739468	0	0.0494906	0	0	0.0191014	0	0.0237588
Serpina11	0.0160672	0	0.00183969	0	0	0.000998278	0	0.00684969
Serpina9	0	0	0.0120062	0	0.00426257	0.00649046	0	0.00692219
Serpina12	0	0	0	0.00813066	0.0231703	0.00796665	0.00412304	0
Serpina3c	0.000894288	0	0.0131518	0	0	0.015602	0	0.0191688
Gsc	0	0	0.0125537	0.0103584	0.00394875	0.010957	0	0
Dicer1	0.0460917	0	0	0	0	0.00494098	0.00477116	0.00465392
Clmn	0	0.706367	0	0	0.00482105	0	0.000866115	0.00365937
Syne3	0.0320725	0	0.444786	0.0118541	0	0.0143163	0	0
Scarna13	0	0	0	0	0.00407742	0.0477004	0.00406337	0.0063775
Tcl1	0	0.00557064	0	0.0111561	0.00164077	0	0.0104361	0
Bcl11b	0	0	0.00360188	0.712873	0.0479037	0.0364533	0	0
A130014H13Rik	0.00507891	0	0.0286727	0.457254	0	0.0540488	0	0
Setd3	0	0.00976411	0	0	0.0367741	0	0.0231261	0.0229081
Ccdc85c	0	0	0	0	0.0221469	0.0187799	0.00247616	0.000971812
Degs2	0	0	0.00863772	0	0.00895099	0.0099802	0	0.00690661
Slc25a29	0	0	0	0.00396572	0.0108524	0.0120477	0.0281711	0
Wars	0	0	0	0	0.00721206	0.0143372	0.00191838	0.0475008
Begain	0.00371323	0	0	0	0	0.015764	0.011177	0.0169905
1700001K19Rik	0.00954636	0	0	0	0	0.00372443	0.0180523	0.0135498
Stk30	0	0	0	0.0241416	0.0151604	0.00220718	0.0110214	0
Cinp	0	0.00926894	0	0	0.00926424	0	0.0309577	0.00728407
Ankrd9	0.0266475	0	0	0	0	0.0120857	0.0042912	0.00288503
Cdc42bpb	0	0.334868	0	0	0.0335704	0	0.042612	0.0379995
Gm266	0	0	0	0.00943048	0.00852331	0.000659709	0.0166698	0
Ckb	0	0	0	0	0.130763	0.0445988	0.0783914	0.131656
Bag5	0	0.0118238	0	0	0.01122	0	0.0351794	0.0180264
Xrcc3	0.0112927	0	0	0	0	0.021972	0.0153535	0.0265691
Ppp1r13b	0	0	0	0.035167	0.013333	0.051442	0.00201505	0
2010107E04Rik	0	0.0275628	0	0	0.0661859	0	0.108622	0.025795
A730018C14Rik	0.0289539	0	0	0	0	0.00899477	0.00366723	0.0234557
Tmem179	0.00760002	0	0	0	0	0.00944067	0.00756584	0.0124296
Akt1	0.0147441	0.0275082	0.00644215	0	0	0	0	0.0560578
Cdca4	0	0	0	0	0.0282997	0.024597	0.00130008	0.0210288
Gpr132	0	0	0.00136125	0.0758668	0.0710746	0.336363	0	0
Jag2	2.19554e-05	0	0	0	0	0.0197481	0.0195814	0.0152206
Nudt14	0	0	0	0	0.0254104	0.0330726	0.0632245	0.0430821
Wdr60	0	0.00354177	0	0	0.0290303	0	0.0161694	0.0391146
Gm10421	0.00432433	0	0	0	0	0.00950177	0.00398798	0.0286871
Sp4	0	0	0.0608572	0.159511	0.00295512	0.0279726	0	0
Itgb8	0.00364542	0	0	0	0	0.0105296	0.00366738	0.00711701
Speer6-ps1	0	0	0.0187395	0.0110032	0.00720287	0.0156416	0	0
Gdi2	0	0.0584247	0	0	0.0037889	0	0.0721964	0.037213
Asb13	0.0233092	0	0.0302209	0.0490691	0	0.00773758	0	0
Calm4	0.00785406	0	0	0.00946774	0	0.00595301	0.0174062	0
Calm5	0.00456176	0.00235273	0	0	0	0	0.0386883	0.047006
Tubal3	0	0	0.000945826	0.00984286	0.00234895	0.0108196	0	0
Akr1c14	0	0	0.00800586	0	0.00462066	0.00413299	0	0.00230964
Akr1c13	0	0.038748	0	0.0220082	0.109773	0	0.00467927	0
Akr1c19	0	0	0.00292599	0.00152984	0.00465047	0.0133381	0	0
Akr1c6	0	0.000424346	0.0015496	0.00413298	0.0233739	0	0	0
Akr1c21	0	0	0.0136368	0.00150215	0.0115562	0.0156757	0	0
Klf6	0	0.13376	0.00936555	0.0840595	0.186927	0	0	0
Pitrm1	0	0	0	0	0.034975	0.00110903	0.086192	0.0159884
Adarb2	0.00226822	0	0	0.0132137	0	0.00963194	0.00112217	0
Larp4b	0.0116459	0.0472972	0	0	0	0	0.0157812	0.0298745
Zp4-ps	0.0166231	0	0.00959236	0.00536455	0	0.0103836	0	0
Heatr1	0.0114891	0	0	0.0195023	0	0.00337084	0.0450571	0
Ero1lb	0.588642	0.0257828	0	0	0	0	0.0244777	0.020671
Prl2c5	0	0	0	0	0.00636794	0.014235	0.0119998	0.00349045
Nid1	0	0	0	0	0.00384496	0.0033769	0.0183375	0.0051408
Lyst	0.0431326	0.00480991	0	0.0391195	0	0	0.00743451	0
Gng4	0.00988101	0	0	0	0	0.00097513	0.00311427	0.00473934
Arid4b	0.0167761	0	0	0.0206949	0	0.0147435	0.000591074	0
Psma2	0	0.0228173	0.00510476	0	0.0403303	0	0	0.0211563
AW209491	0	0	0.0144515	0.00125245	0.0464571	0.00553565	0	0
Gli3	0	0	0	0.0234514	0.00318749	0.00234843	0.0089838	0
Inhba	0	0	0.00335151	0	0.00379026	0.00858055	0	0.0132327
Mplkip	0.00750539	0	0.0146413	0.00696757	0	0.023572	0	0
Vps41	0.00511728	0.0383459	0	0	0	0	0.000626431	0.000124757
Amph	0	0	0.0155129	0	0.00659732	0.0150271	0	0.00580703
Tcrg-V1	0	0	0.693887	0	0.0130739	0.0268463	0	0.0141565
Sfrp4	0.00940237	0	3.52266e-05	0	0	0.00516664	0	0.00413396
Elmo1	0	0	0.00636708	0.0237566	0.0640906	0.0354931	0	0
Aoah	0	0.00329016	1	0.00525052	0.00833076	0	0	0
Trim27	0	0	0	0	0.00595491	0.0513949	0.0108496	0.000358448
Gpx6	0.00349162	0	0	0	0	0.0111844	0.00989321	0.00811105
Olfr1367	0.00149368	0	0.0166431	0.0156035	0	0.00195426	0	0
Zscan12	0	0	0	0.027611	0.0309177	0.00739969	0.00915711	0
Hist1h2bm	0.0230285	0	0	0	0	0.0225721	0.0229213	0.134793
Hist1h2bp	0	0	0.0170561	0	0.00806387	0.00972553	0	0.02633
Zfp184	0.00918098	0	0.00288581	0	0	0.0225205	0	0.0257204
Pom121l2	0	0.00198531	0	0.0154373	0.00506857	0	0.00985766	0
Vmn1r188	0.00275933	0	0.00268306	0	0	0.0124513	0	0.0033669
Vmn1r194	0	0	0	0.00599904	0.00219954	0.0114982	0.0124459	0
Vmn1r195	0	0	0.00438395	0.0141618	0.0163738	0.0112439	0	0
Vmn1r197	0.00360958	0	0	0.00957728	0	0.0131299	0.00172663	0
Vmn1r198	0	0	0.0201561	0.023071	0.00623201	0.0102642	0	0
Vmn1r199	0.0126873	0	0.00501129	0.0011842	0	0.0134801	0	0
Vmn1r200	0	0	0.0128414	0	0.00548649	0.00890738	0	0.00867991
Vmn1r-ps103	0	0	0.0185876	0	0.00243315	0.0169148	0	0.000518478
Vmn1r201	0	0	0.0163835	0.00642054	0.020562	0.013692	0	0
Vmn1r203	0.00409737	0	0.0183218	0.00907688	0	0.0117167	0	0
Vmn1r213	0.00455427	0	0	0	0	0.00625154	0.0039505	0.0214067
Vmn1r214	0	0	0.00839486	0.0074232	0.0141924	0.0116478	0	0
Vmn1r215	0.0132749	0	0	0.00109476	0	0.00852805	0.00827425	0
Vmn1r216	0.00104773	0	0.01604	0.0152445	0	0.00480989	0	0
Vmn1r218	0	0	0.00372348	0	0.00355587	0.0103675	0	0.00322466
Vmn1r219	0.00265438	0	0.0215402	0	0	0.0143388	0	0.0192444
Hist1h4h	0.0830333	0	0	0	0	0.0291329	0.0318965	0.0664083
Hist1h3f	0	0	0	0	0.0208072	0.0127171	0.0116246	0.0020686
Hist1h1d	0.00863193	0	0	0	0	0.00707491	0.00945512	0.0327895
Hist1h2bg	0	0.00347547	0	0	0.00552531	0	0.0248483	0.140679
Hist1h3d	0	0.00602091	0	0	0.00115773	0	0.0131664	0.0989867
Hist1h4d	0	0	0	0	0.00334346	0.0424857	0.0675719	0.197972
Hist1h1t	0.0170527	0	0.00407421	0.00248048	0	0.0148739	0	0
Hist1h2bb	0.0438533	0	0	0	0	0.0113153	0.0808709	0.108931
Hist1h2ab	0.040012	0	0	0	0	0.0182787	0.0909493	0.275405
Hist1h1a	0.159682	0	0	0	0	0.0282711	0.0615827	0.126235
Trim38	0.0100512	0	0.00905044	0.00421488	0	0.00116406	0	0
Slc17a2	0.00192098	0	0	0.00463378	0	0.011554	0.00751323	0
Slc17a3	0.00430093	0	0.0408905	0.0172439	0	0.0085998	0	0
Slc17a1	0	0	0.00697495	0	0.0063127	0.00380042	0	0.00500788
Hist1h2aa	0.0166572	0	0	0	0	0.0132429	0.0213581	0.0600972
Cmah	0.245473	0	0.0586003	0.458488	0	0.374353	0	0
Fam65b	0.0432441	0	0.137765	0.207737	0	0.556046	0	0
BC005537	0	0.0290609	0	0	0.0159644	0	0.0063864	0.00489057
Tdp2	0	0	0	0.01903	0.0041098	0.021657	0.0159444	0
D130043K22Rik	0	0	0.00400307	0.00327134	0.00687629	0.00924875	0	0
Gpld1	0.011719	0	0.0174497	0.0116074	0	0.00554614	0	0
Dcdc2a	0.00323392	0	0.00943104	0.00488654	0	0.0100842	0	0
Prl	0.0084357	0	0.032261	0	0	0.00312386	0	0.0013561
Prl3d3	0	0	0	0.0280689	0.00181876	0.0125496	0.00424989	0
Prl3c1	0	0	0.0299788	0.0272535	0.00515985	0.0131502	0	0
Prl3b1	0	0	0	0	0.0141629	0.00170385	0.00768271	0.020647
Prl3a1	0	0	0.0134132	0	0.0105962	0.000957625	0	0.00013618
Prl6a1	0	0	0.00563595	0.00869315	0.00335275	0.00699355	0	0
Prl8a2	0.00212352	0	0	0.00948827	0	0.000519372	0.0154882	0
Prl2a1	0.00857794	0	0.00288749	0	0	0.0100977	0	0.0374199
Prl2c1	0	0	0.0531076	0.0112877	0.00791587	0.0062316	0	0
Prl4a1	0.00372486	0	0.00277942	0.00456525	0	0.0196204	0	0
Prl5a1	0.00979344	0	0.0366266	0.00108725	0	0.0146218	0	0
Mboat1	0	0	0	0	0.181376	0.0871525	0.110879	0.0008814
Agtr1a	0	0	0	0.00219753	0.000506869	0.0146418	0.00376229	0
Dusp22	0.0335173	0.0438973	0	0	0	0	0.0112218	0.0225005
Irf4	0.805233	0	0	0	0	0.0872054	0.280301	0.115558
Foxf2	0.00255898	0	0	0	0	0.0015509	0.0146962	0.00501558
Foxc1	0.00516697	0	0	0.02527	0	0.0120472	0.0170302	0
Serpinb6b	0	0	0.853129	0.168731	0.420235	0.130848	0	0
Serpinb9	0	0	1	0.471905	0.392981	0.0220791	0	0
Serpinb9b	0	0	0.756674	0	0.0154653	0.0134	0	0.0181108
Serpinb1b	0	0	0.0330111	0	0.0199022	0.00338448	0	0.00518486
Serpinb9d	0.0120611	0	0.00369367	0	0	0.0110242	0	0.00775402
Serpinb9e	0	0	0.0182675	0	0.000586206	0.0135987	0	0.0225903
Serpinb6d	0	0	0.0266646	0.0158296	0.00154924	0.00832936	0	0
Nqo2	0.00828486	0.0618891	0.118153	0.015978	0	0	0	0
Ripk1	0	0.029673	0.0202167	0.0152566	0.0963771	0	0	0
Bphl	0	0	0	0	0.0287952	0.0277437	0.0680783	0.0381294
Psmg4	0.0137024	0	0	0	0	0.0203676	0.0121757	0.0104666
Fam50b	0	0	0.0285631	0	0.00807877	0.00888471	0	0.0033701
Prpf4b	0.012066	0	0.00429836	0.015643	0	0.0202682	0	0
Cdyl	0	0.0120636	0.0756181	0	0.00490896	0	0	0.00872464
Ppp1r3g	0	0	0	0	0.0114195	0.00308754	0.0107456	0.00114331
Fars2	0.00381185	0.00472506	0	0	0	0	0.0239086	0.0452249
Ly86	1	0.323119	0	0	0	0	0.0842575	0.116295
Rreb1	0.0438094	0.0319956	0.0134544	0	0	0	0	0.0709053
Riok1	0.0051259	0	0.00243556	0.00892332	0	0.0395033	0	0
Snrnp48	0.00120119	0	0	0.0268936	0	0.0161996	0.00493558	0
Bmp6	0	0	0	0.00452757	0.0143386	0.00870839	0.00771463	0
Gcnt2	0	0.563551	0	0	0.00740964	0	0.0456597	0.00480178
Pak1ip1	0	0.0144426	0	0.00307684	0.0245927	0	0.04699	0
Tmem14c	0	0.12561	0	0	0.0193976	0	0.0510055	0.0167589
Tmem170b	0.00957937	0.0807192	0	0	0	0	0.0139649	0.105932
Gm5082	0	0.0121054	0.00602144	0	0.00223915	0	0	0.00728131
Gm10790	0.0134694	0	0.00261237	0	0	0.00735344	0	0.0158324
Hivep1	0.128598	0.00803788	0	0	0	0	0.0449597	0.135717
Edn1	0	0	0	0	0.000390389	0.00474486	0.0205529	0.000451461
Phactr1	0	0	0	0	0.000391625	0.00821766	0.0134974	0.00325364
Sirt5	0	0	0.00417251	0	0.0141909	0.0131423	0	0.0109967
Nol7	0.016565	0	0	0	0	0.0113077	0.0328964	0.000531796
Rnf182	0.000614471	0	0.0239798	0.0115975	0	0.0130298	0	0
Cd83	0.284554	0.134284	0	0	0	0	0.014639	0.0127922
Jarid2	0.165422	0	0	0	0	0.0494606	0.016497	0.0747893
Mylip	0.0821653	0.00613166	0.287876	0.130317	0	0	0	0
Gmpr	0.00102377	0.350829	0	0	0	0	0.00594901	0.0045768
Stmnd1	0	0	0.0163651	0.00142834	0.00992738	0.00557858	0	0
Rbm24	0.0123529	0	0.00980819	0.0153973	0	0.0268117	0	0
Cap2	0	0	0	0	0.0200919	0.0233276	0.0246092	0.0395847
C78339	0	0	0.00994782	0	0.0179554	0.0168273	0	0.00297849
Kdm1b	0.132186	0	0	0.0145601	0	0.0149891	5.71477e-05	0
Rnf144b	0	0.204743	0	0	0.0372173	0	0.0188138	0.0141481
Id4	0	0	0	0.00567977	0.00998491	0.00637179	0.0171552	0
Barx1	0	0	0	0.0131254	0.0286379	0.0142678	0.0129662	0
Ninj1	0	0	0	0	0.0218392	0.0401106	0.0364292	0.110558
Bicd2	0.00820872	0.00693917	0	0	0	0	0.00616902	0.0200802
Ippk	0	0	0	0	0.00707291	0.0176594	0.0210831	0.0105247
Ecm2	0	0	0	0.0240076	0.0109021	0.0097839	0.000689832	0
Aspn	0.00336159	0	0.00733587	0	0	0.0161329	0	0.0052705
Omd	0	0	0.00258786	0	0.00720941	0.0115663	0	0.00697603
Ogn	0.00360686	0	5.55889e-05	0	0	0.00692169	0	0.0162276
Nol8	0	0.0101656	0.00174783	0.0671734	0.0100658	0	0	0
Fbxw17	0	0.00818514	0	0.000185282	0.020024	0	0.0422783	0
Gm806	0.00222029	0	0.0128452	0.0155917	0	0.00491754	0	0
Spin1	0.0551015	0	0	0	0	0.00424443	0.0420712	0.0123781
Nxnl2	0.0103826	0	0	0	0	0.0032152	0.0402571	0.0187752
S1pr3	0.176849	0	0	0	0	0.0134563	0.0170064	0.0521854
Secisbp2	0.0215353	0	0	0.0108661	0	0.024261	0.0265029	0
Gadd45g	0	0.223739	0.00282696	0.00981078	0.0360871	0	0	0
Syk	0.741394	0.123836	0.151965	0	0	0	0	0.825656
Sfxn1	0	0	0.00940522	0.0517652	0.00248742	0.0190401	0	0
Hrh2	0	0	0.0676064	0.0429145	0.00294983	0.0294575	0	0
Cplx2	0.140908	0	0.0102585	0.00115717	0	0.0129408	0	0
Simc1	0.0189351	0	0	0.0707562	0	0.00502631	0.0693394	0
Arl10	0.0115475	0.010088	0.0611869	0	0	0	0	0.105371
Higd2a	0	0.006865	0.00161565	0.0144099	0.0973715	0	0	0
Faf2	0.00840524	0	0	0	0	0.00824568	0.00559489	0.013297
Cdhr2	0	0	0.0106331	0.0014187	0.00297655	0.000200228	0	0
Tspan17	0.0103625	0.0181105	0	0	0	0	0.0110858	0.0238258
Unc5a	0.0167765	0	0.0294534	0.0383651	0	0.000810172	0	0
Zfp346	0	0	0	0.000549872	0.00689218	0.0320027	0.00902728	0
Fgfr4	0	0	0	0.00652534	0.00392076	0.00677979	0.00608949	0
Nsd1	0.0309908	0	0	0	0	0.0175252	0.00114074	0.012731
Rgs14	0.0238416	0	0.0115087	0.00571673	0	0.035676	0	0
Slc34a1	0.00823047	0	0.00906796	0	0	0.0162809	0	0.0076262
Grk6	0.158635	0	0.0060973	0.0182745	0	0.120605	0	0
Prr7	0	0	0.00160117	0.00283909	0.00406767	0.028841	0	0
Tmed9	0	0.0204845	0	0.00904517	0.0327217	0	0.0363014	0
B4galt7	0	0	0.153025	0.169188	0.00320021	0.00975683	0	0
Caml	0	0.0184439	0	0	0.00890293	0	0.0139639	0.00474722
Ddx46	0.0181501	0.0370574	0	0.0190478	0	0	0.00837772	0
B230219D22Rik	0.0262435	0	0	0	0	0.00443572	0.0162344	0.0199657
Txndc15	0	0.00397667	0	0	0.0415959	0	0.0218975	0.0220296
Pcbd2	0	0.0176712	0	0	0.0166462	0	0.0233548	0.0119351
Catsper3	0.00413747	0	0.00428197	0.00322482	0	0.00441998	0	0
Slc25a48	0	0	0	0.000417835	0.0018049	0.0120341	0.00270867	0
Fbxl21	0	0	0.0113565	0.0329998	0.01823	0.00827411	0	0
Tgfbi	0.0190438	0.772297	0	0	0	0	0.0301932	0.00286227
Smad5	0.0260182	0	0.0256967	0	0	0.00630731	0	0.0301096
Idnk	0	0	0.0353692	0.0424396	0.00412828	0.0287549	0	0
Ntrk2	0.00258869	0	0	0.00771074	0	0.00936691	0.00029548	0
Naa35	0	0	0.00311759	0	0.00536125	0.00257419	0	0.0101781
Gm5084	0	0	0.0105616	0.0357933	0.00692632	0.012292	0	0
Dapk1	0	0.442115	0	0	0.14034	0	0.377958	0.376347
2010111I01Rik	0.00315396	0	0	0.0139937	0	0.00387493	0.041436	0
Mir23b	0	0.00326818	0	0.213488	0.000653122	0	0.0328211	0
Mir27b	0	0.00146546	0	0.427751	0.0155082	0	0.0368248	0
Mir24-1	0	0	0.00778783	0.0717874	0.0224589	0.00887236	0	0
Habp4	0	0.012769	0.0547759	0.0705856	0.0729264	0	0	0
Cdk20	0	0	0	0	0.0194089	0.00489379	0.0538815	0.0213174
Spata31	0	0	0.0238401	0.000557045	0.0115998	0.000367309	0	0
Spata31d1c	0	0.00106969	0	0.0179034	0.00353882	0	0.00103313	0
Olfr466	0.000100453	0	0.00159493	0	0	0.00945295	0	0.0303422
Zfp369	0	0	0	0.00164284	0.00610181	0.0381604	0.00126924	0
Gm10139	0	0.0212631	0.0135704	0.000733383	0.00596363	0	0	0
Gm10767	0	0	0	0.0176761	0.000947406	0.000869555	0.00726559	0
Ptdss1	0	0.00882057	0	0	0.0231767	0	0.00524825	0.00099646
Zfp759	0	0	0.0277777	0.0601814	0.00353259	0.00528223	0	0
Rsl1	0.0365801	0	0.0163759	0.00253858	0	0.00446377	0	0
Zfp455	0	0.0578819	0.031876	0.0477162	0.0192015	0	0	0
F630042J09Rik	0.00563915	0	0.00788955	0	0	0.0133649	0	0.0172727
4930441O14Rik	0	0	0.00641412	0.0251223	0.0139636	0.0114427	0	0
Gm10037	0	0	0.0180328	0.00892769	0.0226226	0.0028367	0	0
BC048507	0	0	0.00260573	0	0.00973656	0.0132598	0	0.000898975
Fastkd3	0	0	0	0	0.00337411	0.00892857	0.00719314	0.0102123
1700001L19Rik	0	0	0	0.00610599	0.000372832	0.00422472	0.00417536	0
Nsun2	0	0	0	0	0.0110595	0.0163973	0.0816054	0.0111792
Med10	0	0	0	0	0.0384706	0.00227818	0.00213581	0.00272169
Irx2	0	0	0	0.0259836	0.00702033	0.0100185	0.00325041	0
Irx4	0	0	0.000545872	0.0234467	0.0055684	0.00251153	0	0
Mrpl36	0	0.0266764	0	0	0.0415663	0	0.0360277	0.00944874
Lpcat1	0.0311123	0	0	0	0	0.0898959	0.149219	0.0677503
Slc6a3	0.00742126	0	0.00134407	0.0096248	0	0.0042576	0	0
Clptm1l	0	0.0259616	0.00834573	0.00900433	0.000724955	0	0	0
Tert	0	0	0	0	0.00958358	0.0228803	0.0244884	0.0139577
Slc12a7	0	0.064254	0.0877354	0.181912	0.206554	0	0	0
Brd9	0	0	0	0.0629847	0.00245032	0.00219305	0.0287035	0
Zdhhc11	0.000314325	0	0.00299536	0.0252027	0	0.01013	0	0
Tppp	0.00120483	0.0386359	0	0.00705483	0	0	0.0140453	0
Slc9a3	0.00860841	0.000154545	0	0.0175296	0	0	0.0143601	0
Ccdc127	0	0	0.0108214	0.0154882	0.0191577	0.00508745	0	0
Erap1	0	0.00142088	0	0.00844774	0.0186202	0	0.0235023	0
Pcsk1	0.00894159	0	0	0	0	0.00612214	0.00232126	0.000578216
Ell2	0.0840063	0.172304	0.0176265	0	0	0	0	0.0241201
Glrx	0	0.0666122	0	0.0104944	0.145443	0	0.107482	0
Spata9	0	0	0	0.0213059	0.00476239	0.00793087	0.00425146	0
Ttc37	0.0150481	0.000265519	0	0.00263567	0	0	0.0301765	0
2210408I21Rik	0	0.0132189	0	0	0.0420481	0	0.0090207	0.0175029
Fam172a	0.013338	0	0	0.0170618	0	0.00136138	0.00548247	0
Pou5f2	0.0398126	0	0.0505476	0	0	0.0157804	0	0.025716
Arrdc3	0.0143508	0.0301153	0.00370986	0	0	0	0	0.00205243
Lysmd3	0	5.19334e-05	0.0327755	0.077773	0.00538225	0	0	0
Mblac2	0	0.0141318	0.0415861	0.0268955	0.0126449	0	0	0
Cetn3	0	0.0759797	0	0	0.0189384	0	0.0224844	0.00953428
Mef2c	0.608041	0	0.020651	0	0	0.0664414	0	0.235595
Gm10759	0.736807	0	0.0195783	0	0	0.0520466	0	0.102611
Mir9-2	0.00227913	0	0.00696869	0.00216323	0	0.00852596	0	0
Tmem161b	0.0530201	0	0.024462	0.0140608	0	0.00835869	0	0
Ccnh	0.018057	0.0156619	0.00220909	0	0	0	0	0.0348512
Edil3	0	0	0	0.00603412	0.00467602	0.00742661	0.00926438	0
Hapln1	0.00384093	0	0.013713	0.00445011	0	0.00645685	0	0
Ssbp2	0	0	0.0628178	0	0.155822	0.163007	0	0.00572268
Acot12	0	0	0.00624117	0.00289801	0.00609339	0.00595138	0	0
Ankrd34b	0.00168024	0	0.00226265	0.0135311	0	0.0168836	0	0
Serinc5	0.919035	0	0.0267395	0	0	0.0126038	0	0.203625
Mtx3	0.047419	0	0	0.0135112	0	0.016289	0.0391327	0
Homer1	0.0517687	0.109866	0	0	0	0	0.113385	0.0137289
Dmgdh	0	0	9.19213e-05	0	0.00633228	0.00487093	0	2.8085e-05
Lhfpl2	0	0.283023	0	0	0.0179293	0	0.026052	0.0149516
Ap3b1	0	0.013951	0	0	0.00144332	0	0.00970003	0.0298264
Tbca	0	0.0553804	0	0.000246229	0.213338	0	0.0783812	0
Otp	0.00403965	0	0.00170925	0.0213094	0	0.0143034	0	0
Wdr41	0	0.0496752	0	0	0.0239552	0	0.0302544	0.023061
Zbed3	0.0585173	0	0.0262219	0	0	0.0404303	0	0.0599782
F2rl2	0	0	0.310425	0.558566	0.0429604	0.0391642	0	0
Poc5	0.0288004	0	0	0.00818906	0	0.0178284	0.00916568	0
Col4a3bp	0.029946	0.0473771	0.0598648	0.0194752	0	0	0	0
Gcnt4	0	0	0.010067	0	0.021009	0.00843108	0	0.01665
Fam169a	0	0	0.0109641	0	0.00340041	0.00517998	0	0.00628473
Gfm2	0.00965274	0	0	0.00332106	0	0.0175435	0.0218735	0
Enc1	0	0.075817	0.205123	0.0426624	0.0458395	0	0	0
Ankra2	0	0	0.00698614	0.0315714	0.0043355	0.0131645	0	0
Foxd1	0.00138376	0	0.000410276	0.0212439	0	0.011853	0	0
Zfp366	0.00515331	0	0	0	0	0.010451	0.0040361	0.00480097
Mrps27	0	0	0	0	0.0243612	0.00999151	0.08787	0.00474758
Smn1	0	0.0218807	0	0	0.000667322	0	0.0198941	0.0029659
Ccdc125	0.0204394	0.0483976	0.00259476	0.000131161	0	0	0	0
Cd180	1	0.222558	0	0	0	0	0.0957234	0.0366662
Sgtb	0	0	0	0	0.0217906	0.000396013	0.00817686	0.007675
Trim23	0	0	0	0.0386623	0.0107913	0.00968599	0.0170212	0
Adamts6	0.0669499	0	0.0460534	0.0335312	0	0.0467205	0	0
Srek1ip1	0	0.015364	0	0	0.000478869	0	0.0573531	0.0115002
4933425L06Rik	0	0	0.0208296	0.0275802	0.00140262	0.00396402	0	0
Htr1a	0.00418769	0	0.0431238	0	0	0.0115804	0	0.0123263
Dimt1	0	0.00260907	0	0.0145983	0.011391	0	0.0480975	0
3830408C21Rik	0	0	0.0300286	0	0.017089	0.014722	0	0.00361397
Smim15	0	0.0044505	0	0.00119242	0.0225853	0	0.0180308	0
Ercc8	0	0	0	0.0105491	0.00849934	0.0178858	0.0186982	0
Elovl7	0	0	0.871244	0.434562	0.0838284	0.0509583	0	0
Depdc1b	0.014454	0	0.0156402	0	0	0.0276205	0	0.0690827
Plk2	0.0496165	0.0683283	0	0	0	0	0.0631419	0.00227624
Actbl2	0.00495623	0	0	0	0	0.00683184	0.00419248	0.043399
Mier3	0.0481852	0	0	0	0	0.0392966	0.0407128	0.00416484
Ankrd55	0	0	0.00180684	0.0034933	2.94695e-05	0.0110825	0	0
Il6st	0	0.0412791	0	0	0.662101	0	0.895877	0.266104
Ppap2a	0	0.159557	0	0	0.0311228	0	0.00332604	0.00348524
Dhx29	0	0.037512	0	0.00296615	0.000893729	0	0.0101618	0
Ccno	0	0	0.00195013	0.0209605	0.00620051	0.013062	0	0
Mcidas	0	0	0.00188801	0	0.0154957	0.0196099	0	0.00279017
Mir449c	0.0255044	0	0	0	0	0.008633	0.00191447	0.00244404
Mir449a	0.0032942	0	0	0.00510025	0	0.0104111	0.00261498	0
Esm1	0	0	0.00369864	0.0915077	0.0132936	0.0112757	0	0
BC067074	0.00118871	0	0	0	0	0.00671193	0.0364567	0.0034658
Arl15	0	0	0.00479978	0.0268574	0.0674204	0.0379561	0	0
Mocs2	0	0.0224857	0.0118058	0	0.0113805	0	0	0.00592392
Hcn1	0.00196396	0	0.00422729	0.0162352	0	0.00451003	0	0
Fgf10	0.000631111	0	0.00480319	0.0018062	0	0.0109714	0	0
Paip1	0	0.00441393	0	0.00211315	0.0267045	0	0.0242736	0
Gm7120	0	0	0	0	0.0527781	0.00813343	0.0662136	0.0456945
BC016423	0	0	0	0.0526962	0.00138167	0.0166191	0.00419669	0
Calml3	0	0	0	0.00481941	0.00613552	0.00626635	0.000773129	0
Net1	0.0170371	0.404562	0	0	0	0	0.0622565	0.016891
Ucn3	0.0161452	0	0.00263006	0.0024739	0	0.0041908	0	0
Akr1c18	0.00778	0	0.00663077	0.0218779	0	0.00757737	0	0
Akr1c12	0	0	0.00353811	0	0.0209402	0.00201305	0	0.00100897
Akr1c20	0	0	0.0190605	0	0.0136598	0.00929704	0	0.018408
Akr1e1	0	0.0651723	0	0	0.158677	0	0.013605	0.0818345
Pfkp	0	0.0564803	0.132736	0.149611	0.110935	0	0	0
Wdr37	0	0	0	0.0149796	0.00251491	0.0239004	0.00224298	0
Gtpbp4	0	0	0	0.0165286	0.0369165	0.00290442	0.0563022	0
Zmynd11	0.0401881	0	0	0.0152561	0	0.04484	0.00397959	0
Chrm3	0	0	0	0.0784123	0.0291353	0.00822494	0.00799621	0
Ryr2	0	0	0	0.00686617	0.000541739	0.0117491	0.00373545	0
Mtr	0	0.00440711	0	0	0.032983	0	0.0393617	0.0121496
Actn2	0	0	0	0	0.0270825	0.0143532	0.00391011	0.00680963
Lgals8	0.0245652	0.0653244	0.0103593	0.0158591	0	0	0	0
Edaradd	0.464842	0	0.00278864	0.126166	0	0.0218452	0	0
Gpr137b	0.149327	0.493487	0.00484523	0	0	0	0	0.097024
H3f3a	0	0	0.0307266	0	0.0154592	0.0143832	0	0.00957608
Tbce	0	0	0	0	0.00412648	0.00528974	0.040482	0.0032672
Ggps1	0.0120722	0	0.00136822	0.0213321	0	0.00675918	0	0
Hecw1	0	0	0	0.0145315	2.27935e-05	0.00759401	0.0132236	0
Mrpl32	0	0.0272488	0.00100943	0.0106883	0.0304369	0	0	0
5033411D12Rik	0	0	0	0	0.00455675	0.0123846	0.00410572	0.024799
Cdk13	0.0243291	0.000657258	0.00411798	0.00374803	0	0	0	0
Rala	0	0.0482975	0	0	0.0118339	0	0.0130078	0.0162401
Pou6f2	0	0	0	0	0.0182763	0.00690996	0.00301306	0.0077551
Stard3nl	0	0.0477089	0.00639234	0	0.0275602	0	0	0.0533731
Epdr1	0	0	0	0	0.0151772	0.00602651	0.00250419	0.0103143
Nme8	0	0	0.0135303	0.0103039	0.00643094	0.00949777	0	0
A530099J19Rik	0	0	0.000562926	0	0.00242135	0.000959635	0	0.0252001
Gpr141	0	0.237576	0.00134378	0	0.00463759	0	0	0.00436642
Olfr1370	0	0	0.0159325	0.00261746	0.0035008	0.00797394	0	0
Olfr1368	0.00845586	0	0.0242623	0	0	0.00661622	0	0.00298033
Gpx5	0.00322645	0	0.00983912	0.00351458	0	0.0157874	0	0
Zkscan3	0.0193196	0.00722583	0.00110564	0.0146651	0	0	0	0
Pgbd1	0	0	0.00587576	0.00343183	0.0142187	0.0167566	0	0
Zscan26	0	0.0265384	0.0181679	0.057108	0.0520066	0	0	0
Nkapl	0	0	0.0306656	0	0.0168656	0.0014968	0	0.00804208
Zkscan4	0.0281641	0	0.0132932	0.0268769	0	0.0167601	0	0
Zfp389	0	0	0	0	0.0253313	0.0141662	0.0194733	0.0338232
Zkscan8	0.00628754	0	0	0.013277	0	0.0366284	0.0257499	0
Olfr1366	0.0107517	0	0.012858	0	0	0.00526142	0	0.0210705
Olfr1535	0	0	0.0102029	0	0.00732337	0.00615626	0	0.0181063
Olfr1364	0.014044	0.00413068	0	0.0178488	0	0	0.00935272	0
Olfr1362	0.00129779	0	0	0.0088271	0	0.00700358	0.00116467	0
Olfr11	0.00624412	0	0.00612294	0	0	0.0158609	0	0.00145358
Olfr1361	0	0.00315589	0	0	0.00490796	0	0.0161623	0.0144651
Hist1h2ak	0.0840332	0	0	0	0	0.0107361	0.0196121	0.184103
Hist1h1b	0.0762644	0	0	0	0	0.000595663	0.135159	0.735927
Prss16	0.000293131	0	0.00428704	0.0248228	0	0.0138556	0	0
Hist1h4i	0	0	0	0	0.0138509	0.000563238	0.0291559	0.0257983
Vmn1r189	0.000578237	0	0.0168193	0.00683504	0	0.0171974	0	0
Vmn1r191	0.00587699	0.000184962	0.0120598	0.00715858	0	0	0	0
Vmn1r192	0	0	0.00349099	0.00705897	0.00369204	0.00490824	0	0
Vmn1r193	0.0159997	0	0.0201641	0	0	0.00824537	0	0.0248365
Vmn1r202	0	0	0.0186658	0.0212986	0.00856608	0.00261803	0	0
Vmn1r205	0	0	0.0176893	0.00151115	9.29583e-05	0.0108557	0	0
Vmn1r206	0	0	0.0770591	0	0.00895897	0.0113481	0	0.00636924
Vmn1r210	0.0291057	0	0.0661263	0.0410185	0	0.0179794	0	0
Vmn1r211	0	0	0.0088244	0	0.00616225	0.0183882	0	0.0221165
Vmn1r212	0.000266563	0	0.00209228	0.000559735	0	0.00685429	0	0
Vmn1r217	0	0	0.039314	0	0.0125089	0.0115429	0	0.00791857
Vmn1r220	0	0	0.0142435	0	0.0143076	0.0132901	0	0.00689622
Vmn1r222	0.0122108	0	0	0.0373161	0	0.00992176	0.00775035	0
Zfp322a	0	0	0	0.0131941	0.00038691	0.0307375	0.00139257	0
Abt1	0	0	0	0	0.00663682	0.00104937	0.0120402	0.0189423
Btn1a1	0.00236867	0	0.00161181	0.00949822	0	0.00414741	0	0
Btn2a2	0.00503407	0	0	0.000812304	0	0.00677145	0.00248921	0
Hist1h2bh	0.00323599	0	0	0	0	0.0180005	0.0326634	0.0122934
Hist1h4f	0.0182368	0	0	0	0	0.0301221	0.146415	0.314959
Hist1h2ae	0.000767081	0	0.00429763	0.00632879	0	0.0171142	0	0
Hist1h2ac	0.00010853	0.0204366	0	0	0	0	0.0160348	0.0136075
Hist1h4c	0	0	0	0	0.0137291	0.0310149	0.0710817	0.0523159
Hfe	0.00346843	0.12299	0	0	0	0	0.00620139	0.00556751
Slc17a4	0.000969442	0	0.033353	0	0	0.00967305	0	0.0193105
Hist1h2ba	0	0	0	0	0.000661367	0.0130759	0.0184703	0.0673157
Scgn	0.000322604	0	0.00579062	0.0185086	0	0.00746628	0	0
Lrrc16a	0.468959	0	0	0	0	0.0217688	0.00551807	0.0271168
Acot13	0	0.0570673	8.00994e-05	0	0.0424839	0	0	0.0117297
Aldh5a1	0	0	0.0062934	0.0266655	0.0194111	0.0205719	0	0
Mrs2	0.0343703	0	0.00797854	0	0	0.00647666	0	0.00548513
Nrsn1	0.0110327	0	0.0165871	0.00254241	0	0.00838829	0	0
Hdgfl1	0	0	0	0.00378195	0.00646081	0.0062829	0.0100807	0
Prl2b1	0.00431496	0	0.0272367	0.00558088	0	0.010654	0	0
Prl8a6	0.0017998	0	0.0244511	0.00241787	0	0.00853206	0	0
Prl8a8	0	0	0.00457764	0.00773474	0.0121948	0.00900869	0	0
Prl8a9	0	0	0	0.00880382	0.00401529	0.00635559	0.000271166	0
Prl8a1	0	0	0.0245709	0.0525706	0.000250222	0.0133336	0	0
Prl7b1	0.00588781	0	0.0122737	0	0	0.0088547	0	0.0111509
Prl7a1	0.0059989	0	0.0319346	0.00225003	0	0.00969713	0	0
Prl7a2	0.00969136	0	0.0298848	0	0	0.0171632	0	0.0135355
Prl7d1	0.00314992	0	0.00595022	0.00113653	0	0.012113	0	0
Prl7c1	0.0606752	0	0.0291813	0.0127776	0	0.00733997	0	0
Sox4	0.268512	0	0	0	0	0.078471	0.0432028	0.26091
Cdkal1	0.0070936	0	0	0.00278336	0	0.00866622	0.00802338	0
Uqcrfs1	0	0.0378886	0	0	0.00382193	0	0.0493723	0.000348184
Exoc2	0.00256365	0	0.0178182	0.0173508	0	0.00647561	0	0
Hus1b	0.00712424	0	0.0108869	0	0	0.0214376	0	0.00309403
1700018A04Rik	0	0	0	0.0126947	0.002217	0.0147217	0.00906207	0
Gmds	0	0.170471	0	0	0.0567536	0	0.067267	0.00779208
Mylk4	0.0150169	0	0.0230746	0.0029704	0	0.00294349	0	0
Serpinb1a	1	0.656838	0	0	0	0	0.0707936	0.0606873
Serpinb1c	0	0	0.015657	0	0.000772525	0.006429	0	0.00763278
Serpinb9c	0.00182447	0	0.00377557	0	0	0.0173634	0	0.00539729
Serpinb6e	0	0	0.023641	0.014914	0.00487689	0.00995483	0	0
Serpinb6c	0	0	0.0402119	0.0314077	0.021909	0.00633209	0	0
Serpinb6a	0	0.444647	0.0040603	0	0.0161534	0	0	0.00305251
Tubb2a	0	0	0	0	0.0742717	0.00995306	0.0756512	0.0557338
Tubb2b	0.0376139	0	0	0	0	0.022842	0.0533664	0.0407018
Slc22a23	0	0	0	0	0.0115767	0.013641	0.0142227	0.020426
Pxdc1	0.371402	0	0.00571717	0	0	0.00890425	0	0.0226717
Fam217a	0	0	0.0170063	0	0.00410205	0.0110921	0	0.00499616
Eci3	0	0.0106509	0.00156124	0	0.00277601	0	0	0.0022158
Eci2	0	0.128893	0	0	0.0370706	0	0.048464	0.0875374
Rpp40	0	0.0403544	0	0	0.00402903	0	0.0363361	0.0409447
Lyrm4	0	0.187554	0	0.0160473	0.0351943	0	0.00452034	0
Nrn1	0	0	0.00610088	0.03119	0.0153675	0.00140552	0	0
F13a1	0.0777436	0	0	0	0	0.0148393	0.0735407	0.0438823
Ssr1	0	0.0138823	0	0	0.0115849	0	0.0132292	0.0249577
Cage1	0.00624849	0	0.010743	0	0	0.0151281	0	0.00724369
Txndc5	0.0697041	0.00239655	0.00857084	0.0150504	0	0	0	0
Bloc1s5	0	0.0136225	0	0.00498814	0.0297109	0	0.0418775	0
Eef1e1	0	0.0156089	0	0	0.0328009	0	0.0481122	0.0111382
Slc35b3	0.00222862	0.0521662	0.00765884	0	0	0	0	0.00588
Tfap2a	0	0	0	0	0.0120732	0.00792174	0.00683272	0.011318
Mak	0	0.54802	0	0	0.00615533	0	0.00433082	0.0252707
Gcm2	0	0.00379522	0.016718	0	0.00243226	0	0	0.00841811
Elovl2	0	0	0.00998541	0.00578326	0.00584763	0.0199764	0	0
Nedd9	0.215189	0.106842	0	0.0016443	0	0	0.00447494	0
Adtrp	0.000915574	0.100011	0.016408	0.0143774	0	0	0	0
Tbc1d7	0	0.00656203	0	0	0.0218106	0	0.0148649	0.10358
Gfod1	0.207257	0	0.061682	0.0104408	0	0.0124851	0	0
Ranbp9	0	0.0132966	0.00290461	0.0354235	0.00752991	0	0	0
Mcur1	0	0.02947	0	0	0.017156	0	0.0354465	0.0396462
Dtnbp1	0	0.0809692	0	0	0.00103499	0	0.000280995	0.063612
Atxn1	0	0.229211	0	0.293203	0.197467	0	0.0168146	0
Nup153	0	0	0.00805643	0.0100651	0.0258071	0.0270552	0	0
Kif13a	0	0.16656	0	0	0.0432126	0	0.185093	0.21943
Nhlrc1	0	0	0	0	0.00215587	0.00938075	0.0070954	0.00948139
Tpmt	0	0.0209351	0	0	0.0267621	0	0.0153659	0.022443
Dek	0	0	0	0.0025907	0.00145037	0.00347799	0.0132634	0
Zfp169	0.00174822	0	0.00972027	0.0492924	0	0.0200707	0	0
Mirlet7d	0	0.00787797	0.0571034	0	0.0260311	0	0	0.00644404
Mirlet7f-1	0	0	0.125343	0.0520911	0.0972255	0.0077545	0	0
Mirlet7a-1	0	0	0.0197446	0.00385938	0.0304685	0.0244686	0	0
Ptpdc1	0	0.00865302	0	0	0.00621191	0	0.0214406	0.00485233
Phf2	0.102722	0	0.0067741	0	0	0.015643	0	0.00688102
Fam120a	0	0	0.00056431	0	0.00472272	0.00187018	0	0.0127543
Wnk2	0.0439701	0	0.00816516	0	0	0.0133625	0	0.0131591
1110007C09Rik	0	0	0.105373	0.0198834	0.00265513	0.0168038	0	0
Susd3	0.0682835	0	0	0.00592336	0	0.0320895	0.0322498	0
Fgd3	0.0722763	0	0.0215051	0	0	0.0916882	0	0.0049233
Cenpp	0.00206781	0	0	0	0	0.00879663	0.00400469	0.0215639
Shc3	0	0.0333803	0.00889124	0.00683193	0.00843119	0	0	0
Sema4d	0.0508578	0	0.00618532	0	0	0.596892	0	0.00320287
Diras2	0.116315	0	0	0	0	0.00854091	0.0155751	0.0188433
Auh	0	0	0.0146154	0	0.0382268	0.00140592	0	0.00486179
Nfil3	0	0.305116	0.242681	0.0123234	0.216893	0	0	0
Ror2	0.0063015	0	0.000876918	0	0	0.00447912	0	0.00340129
Sptlc1	0	0.0136997	0	0.00409891	0.0247852	0	0.00725889	0
Msx2	0	0	0.00199238	0.0215692	0.0107033	0.00271165	0	0
Drd1a	0.000380472	0	0	0.00498443	0	0.0199303	0.0305732	0
Thoc3	0	0	0	0	0.000197025	0.0098601	0.0258013	0.00699062
4833439L19Rik	0.00234643	0	0	0	0	0.00181746	0.0105699	0.0102824
Nop16	0	0.0100203	0	0	0.00408111	0	0.10577	0.0187994
Cltb	0	0.044945	0.00142999	0	0.29324	0	0	0.00852754
Rnf44	0.0407499	0	0.0310338	0	0	0.0284063	0	0.0185438
Gprin1	0	0	0.0261019	0	0.00351815	0.0127214	0	0.00942846
Sncb	0	0	0.00487426	0.0132456	0.00406778	0.0115881	0	0
Hk3	0.0144885	0.102722	0.023845	0.00450506	0	0	0	0
Uimc1	0	0	0.0324188	0.0347593	0.00172048	0.00979013	0	0
Rab24	0.0732023	0.00567857	0	0	0	0	0.039907	0.0209881
Mxd3	0.00286131	0	0	0	0	0.00348493	0.0208412	0.0178969
Lman2	0	0.00918082	0	0	0.00747633	0	0.0035416	0.0284732
F12	0.00719735	0	0	0.0155943	0	0.0124295	0.0148798	0
Dbn1	0	0	0	0	0.0247245	0.0279996	0.0272329	0.0147354
Pdlim7	0	0.057616	0	0	0.00140016	0	0.00395031	0.0326749
Dok3	0.958251	0.241454	0	0.00211597	0	0	0.036473	0
Ddx41	0.0479692	0.0188224	0	0	0	0	0.0220194	0.00338383
Fam193b	0.0534139	0	0.0302363	0	0	0.0240638	0	0.00785593
Pitx1	0.002598	0	0	0.0167233	0	0.0132509	0.0229217	0
H2afy	0.00481231	0	0	0.0169191	0	0.0439797	0.0173048	0
Tifab	0.0461939	0.402264	0	0	0	0	0.0210315	0.0728972
Neurog1	0	0	0.000230021	0	0.0148737	0.00595702	0	0.00223765
Cxcl14	0	0.0457452	0	0	0.00218874	0	0.00806238	0.00503169
Il9	0	0	0.017855	0	0.0029478	0.00932138	0	0.00336521
Lect2	0	0	0.00821921	0.0106397	0.000418756	0.0138007	0	0
Trpc7	0.0078386	0	0.00969895	0	0	0.00627919	0	0.0198553
Spock1	0	0	0	0.000347157	0.00411469	0.00596245	0.0130175	0
Klhl3	0	0.0101801	0	0.00247364	0.0309588	0	0.0109197	0
Hnrnpa0	0.00982096	0	0	0	0	0.00820603	0.0370391	0.0346453
Ubqln1	0.0528661	0.0484047	0	0	0	0	0.00629928	0.000774294
Kif27	0	0	0	0	0.00865193	0.0114775	0.000209453	0.000898934
2210016F16Rik	0	0.044772	0.00534797	0.0217435	0.0146242	0	0	0
Mir7-1	0	0.000639586	0	0	0.00341543	0	0.00173143	0.0238488
Slc28a3	0.0078784	0	0.00666542	0.0462887	0	0.00661916	0	0
Agtpbp1	0.0520194	0.0511097	0.00585498	0	0	0	0	0.0597762
Golm1	0	0.105658	0.181274	0.278963	0.175968	0	0	0
4921517D22Rik	0	0.0025284	0	0.0419617	0.00439119	0	0.0114792	0
Spata31d1a	0	0.00554355	0	0.0213395	0.0126711	0	0.0208855	0
Spata31d1d	0	0	0	0	0.00329267	0.00721144	0.000894688	0.00391764
Zcchc6	0.018514	0.0155098	0.0132315	0.00177177	0	0	0	0
Gas1	0	0	0	0.00842586	0.00477334	0.00364247	0.00851618	0
BC051665	0	0	0.0374134	0.0183176	0.00973418	0.00586958	0	0
Ctsll3	0.0121706	0	0.00297009	0	0	0.000179961	0	0.00693361
4930486L24Rik	0	0	0.19707	0.0556542	0.0313828	0.022843	0	0
Ctla2b	0	0	0.427404	0.388347	0.0957585	0.0312718	0	0
Tpbpb	0	0	0.00722879	0.0496004	0.00529462	0.00601415	0	0
Ctla2a	0	0	0.906999	1	0.0706819	0.0346816	0	0
Tpbpa	0	0	0.00932182	0	0.0022973	0.0161432	0	0.0132612
Ctsj	0	0	0.018974	0.00362531	0.00173378	0.0156405	0	0
Ctsq	0	0	0.0136428	0	0.000591956	0.0106883	0	0.00367166
Ctsr	0.00307048	0	0.00556288	0	0	0.00832054	0	0.0282302
Cts6	0	0	0.024977	0	0.00592164	0.00955863	0	0.00262135
Cts8	0.000614111	0.00119917	0	0	0	0	0.0156806	0.0121354
Cts7	0.00339315	0	0.0229126	0	0	0.0120037	0	0.0105773
Zfp935	0	0.0969108	0.00877444	0.0248289	0.00183121	0	0	0
6720489N17Rik	0	0.243929	0.00915092	0.0644788	0.0114725	0	0	0
Gm5665	0.00370645	0.0314938	0	0	0	0	0.0085773	0.0167039
Fbp2	0	0	0.00311744	0	0.00899755	0.00953471	0	0.0059868
Fbp1	0	0	0.00270806	0.00144712	0.00447151	0.00110706	0	0
Fancc	0.00403283	0	0	0	0	0.0319481	0.0344433	0.101114
Ptch1	0	0	0	0	0.00876472	0.0939173	0.00183741	0.0106293
Hsd17b3	0	0	0.00622304	0.0010462	0.00910113	0.0120347	0	0
Slc35d2	0	0	0.0833307	0.0547213	0.158494	0.016699	0	0
Zfp367	0	0.000169741	0	0	0.0065909	0	0.00946782	0.0861201
Cdc14b	0	0.134438	0.275733	0.295637	0.0582095	0	0	0
Aaed1	0	0.0225715	0	0.126574	0.037069	0	0.00283167	0
Ctsl	0	0.495505	0	0	0.0845701	0	0.100603	0.167328
Prss47	0.0113583	0	0.00690922	0	0	0.00295164	0	0.00207863
Hiatl1	0	0.145231	0	0.0156247	0.0128358	0	0.0147903	0
Zfp640	0	0	0.0106857	0.000110862	0.0109414	0.00982154	0	0
Gm17449	0.00137542	0	0.0262723	0.0148021	0	0.0125819	0	0
Zfp708	0	0	0.0170151	0.00225722	0.00378288	0.0114967	0	0
Zfp458	0	0	0.00698364	0.0271936	0.023514	0.00676554	0	0
Zfp457	0	0.00220576	0.00732209	0.00443445	0.000540173	0	0	0
Zfp595	0	0	0.0506696	0.0932788	0.00145983	0.00721728	0	0
Zfp953	0.00448981	0	0.0222115	0.0539019	0	0.00900029	0	0
Zfp456	0.0343908	0	0.018652	0.0189577	0	0.00981535	0	0
Zfp459	0	0.00082401	0.00174379	0.239703	0.0287632	0	0	0
Zfp874a	0	0	0.0268154	0.076756	0.0383427	0.00669911	0	0
Zfp874b	0	0	0.0652605	0.0904158	0.0313154	0.0231526	0	0
Zfp58	0	0	0.0315277	0.00893159	0.0174852	0.0289311	0	0
Zfp87	0.0209439	0	0.0392878	0.00113128	0	0.0262891	0	0
Zfp748	0	0	0.0357867	0.0152065	0.00425692	0.0190932	0	0
AA987161	0	0.0257823	0.00679894	0.0428816	0.00311324	0	0	0
A530054K11Rik	0.0175877	0.000669757	0.0132126	0.0180695	0	0	0	0
Zfp71-rs1	0	0.00378464	0.000658601	0.0228491	0.000384048	0	0	0
Zfp85-rs1	0.0378453	0	0.102243	0.0448641	0	0.0359224	0	0
Mtrr	0.0133124	0	0	0.00896319	0	0.011073	0.0523818	0
Adcy2	0	0	0	0	0.00133345	0.0118493	0.00655012	0.0256431
Papd7	0.0077189	0.000291538	0	0	0	0	0.00874772	0.074775
Srd5a1	0	0	0	0	0.0113662	0.0117385	0.0143894	0.0413726
Ube2ql1	0.00443685	0	0	0	0	0.0128442	0.000479472	3.64882e-06
BC018507	0.0108118	0	0	0.00743186	0	0.00409419	0.00120818	0
Adamts16	0	0	0	0.00803828	9.76709e-06	0.00690993	0.00374878	0
Irx1	0	0	0.00116199	0.0114242	0.0100936	0.0144373	0	0
Ndufs6	0	0.00846895	0	0	0.030543	0	0.0444488	0.00456522
Slc6a18	0.0194321	0	0.00500429	0	0	0.00826876	0	0.00629092
Slc6a19	0.00798272	0	0	0.00213074	0	0.0073369	0.0141636	0
Nkd2	0.00424343	0	0	0.0112479	0	0.000926673	0.00330406	0
Trip13	0.0378406	0.0370775	0	0	0	0	0.0913549	0.13918
Cep72	0.0376983	0	0	0	0	0.0214899	0.0423987	0.0300125
Exoc3	0.00816439	0.0291149	0	0.0120541	0	0	0.0161317	0
Ahrr	0	0	0	0	0.00565236	0.0163014	0.0140408	0.00805236
Pdcd6	0	0.0260393	0	0	0.0998017	0	0.0332189	0.00616887
Sdha	0	0.0276455	0	0	0.0210961	0	0.0162058	0.0155834
Lrrc14b	0	0	0.016703	0.00852289	0.00259654	0.00540545	0	0
Zfp72	0.00296709	0.00309841	0	0.0303668	0	0	0.0114578	0
Zfp825	0.0145306	0	0.0424066	0.0601118	0	0.0137326	0	0
Cast	0	0.0557181	0.0695771	0.0814578	0.0526795	0	0	0
Rhobtb3	0	0	0.0126326	0.0078336	0.0132713	0.0153959	0	0
Rfesd	0.0147063	0	0.00922912	0.00801145	0	0.0126117	0	0
Gpr150	0	0	0.0156335	0.0283331	0.00144665	0.00962884	0	0
Arsk	0.0117985	0.118812	0.00132069	0	0	0	0	0.00225766
Ankrd32	0.00356468	0	0	0.0145271	0	0.00366377	0.0235049	0
Nr2f1	0	0	0.022558	0.00138859	0.0103294	0.004724	0	0
Gpr98	0.00118556	0	0	0.00642237	0	0.00592528	0.000729005	0
Polr3g	0	0	0.00310564	0	0.0911541	0.00979495	0	0.000759429
Rasa1	0	0.0128129	0.0961229	0.0355614	0.0271529	0	0	0
Vcan	0	0.000549754	0	0.0130053	0.000155278	0	0.00392089	0
Xrcc4	0	0.0142318	0	0.0272036	0.046265	0	0.0426626	0
Atp6ap1l	0	0	0	0.00469088	0.00288664	0.0142654	0.00367386	0
Atg10	0	0.0239032	0.00425428	0	0.0111101	0	0	0.0247492
4833422C13Rik	0.0115302	0	0.00683479	0	0	0.0113684	0	0.0122948
Zcchc9	0	0.000884018	0.0144249	0	0.00617614	0	0	0.0416368
Ckmt2	0	0	0	0	0.00722932	0.0096554	0.00351341	0.00330014
Rasgrf2	0	0	0	0.0020178	0.0519397	0.00627545	0.0606635	0
Msh3	0.092192	0	0	0	0	0.0796613	0.00113373	0.00670765
Fam151b	0	0.0120306	0	0	0.00895635	0	0.00128704	0.000401478
Zfyve16	0	0.0221804	0	0	0.00626393	0	0.00624533	0.00401564
Spz1	0	0	0.0089837	0	0.00410082	0.00795231	0	0.00877664
Thbs4	0.00775401	0	0.00561909	0	0	0.0139008	0	0.00567476
Jmy	0	0.00407001	0	0.0059403	0.0422499	0	0.0229143	0
Bhmt2	0.00122033	0	0	0.00718622	0	0.00374167	0.00248906	0
Scamp1	0	0.121494	0	0	0.130542	0	0.0818157	0.164806
Pde8b	0.00214623	0	0	0.00205949	0	0.00283027	0.023915	0
Aggf1	0.00782414	0	0	0.00681661	0	0.00171102	0.00116596	0
Crhbp	0	0	0.0318712	0	0.00100217	0.024213	0	0.00347656
S100z	0.00150892	0	0	0.00475001	0	0.0159146	0.0167593	0
F2rl1	0	0	0.0885459	0.148531	0.00679123	0.024789	0	0
F2r	0	0	0.400889	0.680669	0.22038	0.0983488	0	0
Iqgap2	0	0.00607135	0.0387648	0.139319	0.713724	0	0	0
Sv2c	0	0	0.0129365	0.00179217	0.0060339	0.0158124	0	0
Ankdd1b	0.00430061	0	0	0.00310978	0	0.00578716	0.000223738	0
Polk	0	0.0148115	0.0467169	0.0649771	0.0467488	0	0	0
Hmgcr	0	0	0	0	0.0256797	0.0107581	0.115822	0.0983367
1700029F12Rik	0	0.00093245	0.00669081	0.00719535	0.00383211	0	0	0
Hexb	0.0889633	0.0448595	0.0323941	0.0136434	0	0	0	0
Arhgef28	0	0	0	0.00439863	0.0143021	0.0110014	0.00581838	0
Utp15	0.00792658	0	0	0	0	0.00485628	0.0784071	0.00770849
Tmem174	0.00887207	0	0.0118056	0.00541977	0	0.0232406	0	0
Tmem171	0	0	0.112431	0.0101057	0.0102178	0.0137302	0	0
Fcho2	0	0.0729537	0.0765517	0.0174757	0.0737226	0	0	0
Tnpo1	0	0.00747184	0	0	0.0152175	0	0.0121083	0.0245585
1700024P04Rik	0.010396	0	0	0	0	0.00912123	0.0197404	0.0180998
Ptcd2	0	0.00234923	0	0	0.0231488	0	0.0838885	0.00317159
Map1b	0	0	0	0.00931609	0.00431273	0.00985354	0.0125476	0
Cartpt	0	0	0	0.0110769	0.00963731	0.0123114	0.0201208	0
Mccc2	0.00728846	0.139216	0	0	0	0	0.076412	0.0210833
Bdp1	0.0380563	0	0.00235188	0.00401259	0	0.00481261	0	0
Naip2	0	0.40959	0.172837	0	0.076827	0	0	0.00426862
Naip1	0.0120841	0.0689216	0	0	0	0	0.00112285	0.0264762
Gtf2h2	0.0321492	0.0259052	0	0	0	0	0.00642354	0.0129673
Ocln	0.00125576	0.205668	0.00370967	0	0	0	0	0.0025764
Marveld2	0.0121438	0.217426	0.0201512	0.0116973	0	0	0	0
Rad17	0.0252747	0.00410593	0.00674718	0.0033739	0	0	0	0
Cenph	0.0260104	0.0327365	0	0	0	0	0.0189792	0.0821974
Slc30a5	0.140943	0.0047165	0	0	0	0	0.0399096	0.0194717
Pik3r1	0	0	0.120164	0.00710959	0.0383599	0.018705	0	0
Mast4	0.194111	0	0	0	0	0.0656567	0.082162	0.0338884
Srek1	0.00212038	0	0	0	0	0.0211101	0.0339035	0.0132475
Erbb2ip	0	0	0	0.00514069	0.0174531	0.0173702	0.00183887	0
Nln	0.0328927	0.343199	0.000695897	0.000238378	0	0	0	0
Trappc13	0	0.028975	0	0	0.0213669	0	0.0154454	0.00474397
Ppwd1	0.00917386	0.00957229	0	0	0	0	0.00267253	0.0330957
Cwc27	0.00934501	0	0	0	0	0.00897956	0.00980006	0.0457136
Fam159b	0	2.65488e-05	0	0	0.00332984	0	0.0180058	0.00600868
Rgs7bp	0.00530103	0	0	0.0114486	0	0.0216146	0.00670373	0
Rnf180	0	0.38428	0	0	0.0261703	0	0.0161139	0.00669088
Ipo11	0.0190485	0.0151089	0	0	0	0	0.0269932	0.0170399
Kif2a	0	0	0.00132415	0.0204992	0.0984401	0.0169179	0	0
Zswim6	0	0.0106846	0.0983533	0.0924978	0.0382066	0	0	0
Ndufaf2	0	0.00641381	0	0.000799353	0.0567272	0	0.0153287	0
Rab3c	0	0	0.014823	0.0103108	0.0210324	0.00413225	0	0
Gapt	0.951135	0.12692	0.0658032	0	0	0	0	0.0238553
Gpbp1	0	0	0	0.0125269	0.00156243	0.0181759	0.00911005	0
Map3k1	0.334401	0	0.0141265	0	0	0.0450391	0	0.0275644
Il31ra	0	0	0	0.00578389	0.00752112	0.00808605	3.78709e-05	0
Ddx4	0	0	0.00175544	0.00224969	0.0237629	0.0103409	0	0
Skiv2l2	0	0.00461099	0.00553625	0.00977198	0.00386373	0	0	0
Gpx8	0	0	0.289948	0.0177682	0.00737576	0.00426223	0	0
Gzma	0	0	1	1	0.0349569	0.0254331	0	0
Gzmk	0	0	0.243837	0.372833	0.00720889	0.00239627	0	0
Snx18	0	0.00587287	0.143448	0	0.0133713	0	0	0.00474232
Hspb3	0.00265995	0	0.00386677	0.0335318	0	0.00491263	0	0
Ndufs4	0	0.0224858	0	0	0.0605773	0	0.0124024	0.0218177
Itga2	0	0	1	0.025963	0.00464274	0.0180624	0	0
Itga1	0	0.0759556	0.0940117	1	0.0263712	0	0	0
Isl1	0.00513161	0	0	0	0	0.00274071	0.00902791	0.00106583
Parp8	0	0	0	0.00665443	0.039002	0.00151295	0.030819	0
Nnt	0.0320671	0.0408332	0.0418254	0.0336913	0	0	0	0
3110070M22Rik	0	0	0.00300732	0.00235284	0.0215906	0.0153926	0	0
Zfp131	0.0547827	0	0	0	0	0.0104254	0.0146125	0.00385717
Nim1	0	0.00203806	0	0	0.0219879	0	0.0382009	0.00656852
Hmgcs1	0	0.0891529	0	0	0.0756333	0	0.0914086	0.132418
Gm3002	0	0	0	0.0518239	0.0860933	0.212197	0.225316	0
1700084P21Rik	0	0	0.0159604	0.0024807	0.0077708	0.000511288	0	0
Flnb	0	0	0	0.00294292	0.0646397	0.290628	0.0454002	0
Abhd6	0.0224375	0.00171466	0	0.0903333	0	0	0.101753	0
Rpp14	0	0.00826308	0	0	0.0131114	0	0.0304008	0.0186527
Pxk	0.468041	0	0.0126981	0.00636353	0	0.00118002	0	0
Kctd6	0	0.00958538	0	0	0.0103386	0	0.00179199	0.0104774
Ptprg	0	0	0.00593266	0	0.0174422	0.00516184	0	0.0156003
Gm10404	0.00615463	0	0.0119368	0.011929	0	0.00943818	0	0
3830406C13Rik	0	0.0165915	0.000980571	0.0205073	0.0247417	0	0	0
Synpr	0.00194137	0	0	0.00655237	0	0.00203896	0.00489467	0
Sntn	0.00107932	0	0	0	0	0.00752305	0.00020773	0.000813137
Atxn7	0.0351925	0	0.0145547	0.00831697	0	0.0414318	0	0
Olfr31	0	0	0.0223617	0.0127236	0.00330635	0.00880845	0	0
Il3ra	0	0	0	0	0.0114964	0.0219856	0.00648747	0.0617916
Slc4a7	0.0105485	0	0	0.0681522	0	0.0328112	0.0382193	0
Nek10	0	0	0.0216302	0.000213541	0.0104725	0.010885	0	0
Ngly1	0	0.0221768	0	0.0206405	0.0302826	0	0.00319141	0
Top2b	0.0275914	0	0	0.010417	0	0.00600812	0.00489086	0
Thrb	0.00105518	0	0	0	0	0.0121515	0.0150332	0.0139659
Nkiras1	0	0	0	0.0438331	0.0327548	0.00322608	0.0222836	0
Fdft1	0	0.0275501	0	0	0.0615538	0	0.093323	0.056177
Nudt13	0.011036	0.0106714	0	0	0	0	0.000899475	0.00836757
Fam149b	0	0	0.00219464	0	0.0144049	0.0220529	0	0.00510564
1810062O18Rik	0.0237223	0	0.00116285	0.00571623	0	0.0136225	0	0
Sec24c	0.00135092	0	0.0189074	0.00479058	0	0.00697237	0	0
Chchd1	0	0.0173541	0	0	0.0295201	0	0.0806659	0.00713307
Zswim8	0.0171016	0.00621268	0.0230632	0	0	0	0	0.0383424
Plau	0	0.113665	0	0	0.0125814	0	0.00521107	0.0382484
Vcl	0.223045	0	0.0855142	0	0	0.0948957	0	0.149238
Adk	0	0.02988	0	0	0.0920384	0	0.270202	0.152452
Kat6b	0.00111514	0	0	0	0	0.0146934	0.021651	0.0398339
Samd8	0.00858288	0.18402	0	0	0	0	0.002804	0.0117005
1700112E06Rik	0	0.22025	9.11494e-05	0	0.00668951	0	0	0.0409862
E330034G19Rik	0	0	0.0477997	0	0.00726591	0.0105511	0	0.00359039
Gm10398	0.0171318	0	0.002997	0	0	0.00295756	0	0.0057795
4931406H21Rik	0.0121856	0.0225017	0.0672415	0	0	0	0	0.0343753
Ppif	0	0	0	0.00638047	0.0204767	0.0546019	0.00301867	0
Arf4	0	0.0349119	0	0.00189905	0.0177251	0	0.0441862	0
Dnah12	0	0	0	0.00149537	0.0265724	0.0102637	0.0074676	0
Asb14	0.00141659	0	0	0.0070852	0	0.00811113	0.00407701	0
Hesx1	0	0	0	0.0547198	0.0164948	0.00819238	0.0027849	0
Arhgef3	0	0.024771	0.0884902	0.140835	0.00595086	0	0	0
D14Abb1e	0.0104754	0	0.0207619	0.0448392	0	0.00236123	0	0
Erc2	0	0.0677019	0.0163828	0.00423202	0.00935141	0	0	0
Wnt5a	0	0.00281376	0	0.00736944	0.015074	0	0.0136858	0
Lrtm1	0	0	0.00810967	0	0.00296912	0.0156311	0	0.00232379
Selk	0	0.0518316	0	0	0.0167179	0	0.0140898	0.01379
Actr8	0	0	0.0153103	0.0143848	0.00833789	0.00890383	0	0
Chdh	0	0	0	0	0.0188956	0.0164706	0.019568	0.0235339
Dcp1a	0.02043	0	0.0164014	0	0	0.0462918	0	0.0018517
Tkt	0	0.0654096	0	0	0.0182076	0	0.100285	0.116799
Rft1	0.0291001	0	0	0	0	0.00281121	0.0820432	0.0106753
Tmem110	0	0	0	0	0.00378687	0.0187761	0.0107144	0.0078148
Mustn1	0	0	0	0	0.017795	0.00599609	0.0150503	0.0162477
Itih4	0	0	0.00461069	0.0144744	0.00439254	0.0109982	0	0
Nek4	0	0.00506816	0	0	0.0184328	0	0.0187	0.0527346
Glt8d1	0	0.0378225	0	0	0.0100515	0	0.00960202	0.033057
Tnnc1	0.0041812	3.4872e-05	0	0	0	0	0.0110952	0.0113872
Sema3g	0.012466	0	0	0	0	0.00402016	0.0154192	0.00381013
Bap1	0.0252135	0	0	0	0	0.0338789	0.00730809	0.00443694
Capn7	0.0245255	0.0162401	0.00259835	0	0	0	0	0.010529
Eaf1	0.0301591	0	0.0124146	0	0	0.0276512	0	0.0310794
Btd	0	0.0217395	0	0	0.0447299	0	0.0147862	0.0126843
Galnt15	0	0	0	0.00968677	1.70537e-05	0.000951282	0.0135572	0
Oxnad1	0	0	0	0.040628	0.0190542	0.00605717	0.00473328	0
Msmb	0	0	0.0169455	0.00501198	0.00151659	0.0072439	0	0
Parg	0.00425783	0.000323433	0	0.0138444	0	0	0.00478557	0
Ogdhl	0	0	0.00291397	0	0.00396525	0.00735416	0	0.00121613
Ercc6	0.0292095	0	0	0.0109662	0	0.00496719	0.0088916	0
Prrxl1	0.00418875	0	0.012392	0.00518669	0	0.0149202	0	0
1810011H11Rik	0	0.64323	0	0	0.0109387	0	0.00359516	0.00240859
Fam170b	6.78683e-05	0	0.00630975	0	0	0.0116453	0	0.00431759
Vstm4	0	0	0.0109804	0.000806443	0.00939084	0.00978564	0	0
Lrrc18	0.14888	0.0270752	0	0	0	0	0.00680919	0.00333552
Arhgap22	0	0.00779914	0	0	0.0104687	0	0.00286256	0.0214225
Gm626	0.00435354	0	0	0.0139548	0	0.00937752	0.00480682	0
Ptpn20	0.00824044	0	0	0.0113335	0	0.0121691	0.00220741	0
Gdf10	0	0	0.00491089	0.00217066	0.00521728	0.0129029	0	0
Gdf2	0.0090377	0	0.0230264	0.0202465	0	0.00617482	0	0
Rbp3	0	0	0	0.00629645	0.00116772	0.00707929	0.0043905	0
Gm5460	0	0	0.0196185	0.0060354	0.00468243	0.0148163	0	0
Antxrl	0	0	0.017656	0	0.00554385	0.00843275	0	0.00219285
Anxa8	0	0	0.0140907	0	0.00117451	0.00103863	0	0.000927775
Syt15	0.0194535	0	0.0108518	0	0	0.00567633	0	0.00554825
Glud1	0	0.0728385	0.00305524	0.0204932	0.0467151	0	0	0
Mmrn2	0.000812956	0	0.000189671	0	0	0.00184236	0	0.0144155
Wapal	0	0	0	0.0141564	0.123826	0.00114116	0.00219392	0
Grid1	0.0070715	0	0	0	0	0.00775927	0.00366673	0.00585798
Mir346	0.0131838	0	0.00394556	0.00785341	0	0.00649819	0	0
4930474N05Rik	0.0161014	0	0.024282	0	0	0.00932683	0	0.0124881
Lrit1	0	0	0.000389571	0	0.00292147	0.00102878	0	0.00776198
Lrit2	0.0213001	0	0	0	0	0.00904677	0.00683143	0.00761662
Dydc1	0	0	0	0.00535829	0.0100972	0.0137981	0.0146192	0
Mat1a	0.0110321	0	0	0.00864639	0	0.00870098	0.00502883	0
Sftpa1	0	0.00498604	0	0	0.00306813	0	0.00866793	0.000153622
Mbl1	0	0	0.00870035	0	0.00400243	0.00692363	0	0.00999452
Gm2959	0.0113703	0	0.0038552	0.0221682	0	0.00631478	0	0
BC061237	0.00748485	0	0	0	0	0.00372521	0.00851502	0.023702
Ptger2	0	0.162543	0	0.00837094	0.0326365	0	0.00397086	0
Gpr137c	0.00104624	0	0	0.00350255	0	0.0178557	0.00110386	0
Psmc6	0	0.0272334	0	0	0.0356678	0	0.0613626	0.0224424
Cdkn3	0.0866507	0.0151305	0	0	0	0	0.0345637	0.0373622
[truncated: 14,877 more rows]

## Sheet: Infiltration score
Supplementary Table S3- ImmGen weights and TCGA infiltration scores
	MF.PPARneg.LU	T.4pos8INT.TH	T.4FP3pos25pos.SP	T.4INT8pos.TH	T.4SP24neg.TH	T.4SP24INT.TH	T.4SP69pos.TH	T.8SP24neg.TH	T.8SP24INT.TH	T.8SP69pos.TH	T.DP.TH	T.DP69pos.TH	T.DPBL.TH	T.DPSM.TH	T.ISP.TH	B.FRE.BM	B.FRF.BM	LTHSC.BM	PREB.FRD.BM	PROB.FRBC.BM	PREB.FRC.BM	CD150negCD48neg.BM	IMMTGD.VG2pos.TH	IMMTGD.VG2.E17.TH	MATTGD.VG3.E17.TH	MATTGD.VG3.E17.TH.	TGD.SP	TGD.TH	TGD.VG2pos.ACT.SP	TGD.VG2neg.ACT.SP	TGD.VG2neg.SP	B.FO.PC	B6SPLFO	B.FRE.FL	B.GC.SP	B.MZ.SP	B.T1.SP	B.T2.SP	B.T3.SP	B1A.PC	B1A.SP	B1B.PC	DC.103pos11Bneg.LU	DC.103pos11Bneg.LV	DC.103neg11Bpos.LV	DC2.MLN	DC2.LN	DC2.SP	DC1.MLN
ACC__TCGA-OR-A5J1	-24.9112	-2.58001	-0.675478	-2.76665	2.54079	9.27248	4.65191	-0.725088	0.976105	0.381813	-3.08429	2.65584	0.442377	3.95811	6.53448	-3.10627	-0.607478	5.48643	-3.02423	5.91121	2.78364	10.3125	-5.18802	-0.331232	-2.84852	-5.01209	-4.88241	-2.14531	-8.55435	-22.0369	-5.15736	0.0402044	5.92922	-2.80007	-3.11518	5.28664	-1.36717	3.92752	7.29521	1.03486	6.44708	2.85468	-13.2345	-10.3621	-10.2546	-8.72308	-14.2717	-6.84849	-8.2515
ACC__TCGA-OR-A5J2	-33.107	-0.555546	1.00377	-0.816248	6.08193	9.73533	6.83449	0.232503	2.28299	-0.0596738	-1.58971	2.58626	3.09612	3.42026	6.1506	-2.93992	-0.683173	8.47474	1.8155	11.488	6.32793	12.2348	-1.94059	1.62109	-0.116652	-4.26692	-4.24623	-0.169889	-4.99316	-6.20827	-2.22698	-0.015278	4.42268	1.63373	-2.05468	3.3208	-0.470212	4.07419	6.70143	1.2715	4.83236	2.13917	-17.3585	-15.6579	-14.8253	-17.2194	-27.9216	-14.4091	-16.1496
ACC__TCGA-OR-A5J3	-33.2713	-6.10244	-2.56495	-5.22641	4.38526	11.3868	6.19049	-0.342241	-0.28963	-0.0386197	-4.31505	-0.523953	0.895926	1.7423	9.10808	-3.75925	-1.71647	9.81809	0.635816	13.7114	7.16416	17.0634	-5.66855	-1.37189	-0.747288	-4.0878	-9.05432	-0.357935	-11.03	-12.5801	-8.14346	-2.13025	4.4709	-1.90183	-3.85989	4.85553	-2.27308	3.18319	5.56609	0.100977	4.90344	1.56177	-21.3586	-19.6785	-20.496	-19.2703	-30.9108	-13.9532	-18.0552
ACC__TCGA-OR-A5J5	-43.4285	-4.31262	-1.10544	-1.67128	6.05669	13.236	7.89625	2.02985	1.2659	2.42794	-0.691008	2.61491	4.58786	4.00004	9.34979	-2.36617	-0.982943	8.78981	0.948528	12.018	6.53619	11.645	-1.57965	0.781544	1.98362	-2.28242	-5.8213	4.21545	-8.80222	-10.9691	-7.10896	-0.983361	-1.49336	-2.83671	-3.43858	2.48704	-3.26077	-1.2466	-0.447721	-3.6018	0.630395	-4.3251	-20.3329	-17.6217	-21.6652	-15.7208	-22.9261	-9.91566	-16.5535
ACC__TCGA-OR-A5J6	-9.2822	-4.75806	-0.311347	-5.0929	-2.35892	3.61526	0.924952	-5.31447	-5.98331	-2.23962	-6.89618	-1.14908	-9.87243	1.89547	-4.54081	0.319248	3.90201	4.09989	-5.3924	-0.998804	-2.51491	8.67691	-8.12509	-11.1295	-11.5461	-10.4611	-0.816639	-6.8226	-6.44242	-22.8745	-5.45005	7.39584	13.4591	-3.23902	-6.09363	12.1815	6.47576	11.0454	13.9376	10.8688	12.4538	14.1876	-10.0728	-6.04469	3.31476	-5.06838	-7.41078	-1.09479	-3.31159
ACC__TCGA-OR-A5J7	-33.6548	-5.61565	-1.82256	-3.47282	7.11	9.71507	5.51278	1.82599	3.20158	0.434175	-4.72184	-1.90518	6.49921	-0.117484	11.9414	-3.61425	-4.20538	9.13304	3.62217	17.5519	17.7329	15.844	-3.38133	5.198	6.61228	0.703842	-33.2441	2.07065	-13.2889	-26.3521	-9.46728	-3.95103	1.08215	4.36427	1.88054	2.87612	-3.26931	1.97099	3.78451	-2.91196	4.32584	-2.08299	-16.2778	-13.48	-17.8985	-17.4881	-32.0059	-13.3092	-14.3076
ACC__TCGA-OR-A5J8	3.56643	3.44244	4.73546	-8.04518	-5.96474	-4.15892	-4.77931	-7.11514	-7.40722	0.631165	4.56167	6.44838	-8.91942	3.04823	-9.73969	-1.31003	-0.62113	-6.46208	4.91693	-6.74459	-7.60969	-6.66397	-8.02803	-5.7221	-7.86507	-7.12929	5.95841	-5.95544	4.88993	3.51062	-1.31615	1.29801	-6.48725	-8.83039	-8.94205	1.33058	-1.89496	-6.19702	-6.65389	-6.26689	-5.82347	-5.98236	-4.1916	4.98771	6.21612	5.48271	6.0667	7.75381	-4.62836
ACC__TCGA-OR-A5J9	-41.9773	-2.29443	-0.414171	-1.86686	7.2796	14.398	9.18238	2.01427	3.3009	3.09938	-2.39668	3.52196	4.02303	3.62552	9.48669	-4.65392	-3.74242	7.61741	1.22587	14.0655	7.08459	11.8026	-2.80762	0.929726	0.931733	-2.94903	-6.98743	2.43925	-8.23652	-9.84737	-4.6115	-3.44102	2.74911	-0.875627	-3.41362	2.34872	-2.9841	2.03274	5.30447	-3.28234	2.81046	-2.84875	-20.4889	-17.5716	-18.8616	-17.4961	-29.6071	-14.4353	-17.3103
ACC__TCGA-OR-A5JA	-35.1009	-7.42682	-2.92106	-5.13296	4.0521	9.26827	4.31506	-0.4002	0.537733	-0.377243	-3.15404	-1.94653	6.53637	0.854702	12.9199	-3.45773	-3.6955	7.43803	2.45685	15.6236	10.1688	11.6596	-4.53082	3.34406	4.25706	-0.220318	-8.90166	2.22953	-13.3675	-13.3627	-10.1841	-4.02268	1.58282	2.74393	1.65552	2.88988	-3.60491	1.37279	3.00075	-1.58497	5.00458	-0.903703	-18.112	-15.459	-18.8459	-14.3386	-25.4247	-9.41507	-15.8408
ACC__TCGA-OR-A5JB	-0.85943	-12.1459	-7.17061	-4.12892	-4.03709	-0.788709	-1.30739	2.20845	0.255075	-0.413821	-8.3236	-5.38384	0.307049	-4.92377	4.33062	-5.17418	-3.1068	-6.58956	-1.83855	-0.404956	1.82023	-5.18575	-8.71444	1.25119	8.50488	3.34065	-22.8993	-0.0350752	-11.6177	-13.6138	-6.68375	-6.13253	-0.309405	-4.97263	0.524718	0.295114	-6.14411	-0.622462	-0.443265	-1.00686	-0.111513	-0.46133	-6.62596	-12.1985	3.56109	-22.7431	-24.5126	-2.50037	-6.58265
ACC__TCGA-OR-A5JC	-32.8853	-6.55081	-2.15362	-4.39776	2.32399	7.20354	2.35293	-0.0210569	-0.839759	-0.449112	-4.08096	-1.88866	1.76401	1.06402	7.25762	-1.86582	-0.961133	6.9582	1.92013	13.5056	7.63106	12.4696	-4.57909	0.874017	1.76399	-1.19259	-5.22751	0.318415	-8.9108	-9.63568	-7.73767	-1.20659	3.6533	0.74255	-1.63965	5.36806	-0.765178	3.95719	5.23192	-0.91156	6.13611	0.271486	-13.2053	-9.86264	-12.9317	-11.471	-18.9347	-6.4386	-9.66616
ACC__TCGA-OR-A5JD	-7.26921	-11.0463	-0.125942	-11.0737	-1.63578	4.90844	1.88001	-3.48375	-7.24954	-0.830477	-4.44425	1.54307	-8.26717	3.35805	-3.04396	-0.676457	6.2325	1.84883	-5.46822	-5.41674	-4.66994	3.8108	-11.288	-3.27176	-7.05848	-6.8506	2.86965	-4.36435	-3.30363	-18.2148	-2.17413	6.29704	10.9799	-5.36683	-7.15603	9.82013	6.00199	8.03842	10.4646	1.61761	10.1344	10.6826	-9.17207	-4.99689	2.91866	-7.17304	-9.92256	-3.49021	-5.32365
ACC__TCGA-OR-A5JE	-23.8855	-5.15876	-1.22535	-3.49437	6.04053	11.0791	5.89754	2.63607	-0.29901	1.84555	-4.70141	0.521613	3.05434	0.254385	8.25493	-3.42516	-2.37358	4.18816	1.13683	11.7877	7.96518	7.32987	-4.68864	2.80252	2.99642	-0.789185	-5.37557	2.61911	-11.186	-11.9033	-8.80328	-2.03439	0.874565	0.0954207	0.127335	4.64219	-3.35322	0.992511	2.52705	-2.36496	6.08968	-2.2183	-12.5997	-9.04649	-11.1023	-9.41002	-14.6078	-5.60383	-10.8033
ACC__TCGA-OR-A5JF	-31.8986	-5.13278	-2.50518	-5.23105	3.34686	10.0759	4.78802	-1.62101	-0.884857	-0.912666	-7.09655	-0.471185	-0.741256	1.60802	7.12488	-3.80639	-1.71804	7.59799	-1.71989	11.2117	6.05228	15.2016	-6.72373	-1.4106	-0.898265	-4.81956	-7.69857	-2.52658	-10.2002	-11.2782	-7.53708	-1.33518	6.51043	-0.325259	-3.76024	5.33859	-0.755932	4.74437	7.58902	1.05723	6.84312	3.42329	-18.2555	-17.511	-17.7161	-18.7767	-29.4918	-13.3184	-17.914
ACC__TCGA-OR-A5JG	-29.0289	-6.37497	-3.44686	-4.49028	4.45227	9.3091	4.3257	0.941466	1.12	0.0918682	-4.75957	-1.37776	5.25521	-0.235207	11.0735	-3.29885	-3.36201	6.77522	2.26401	14.5943	10.7125	12.5715	-4.74832	2.79898	2.75799	-0.776854	-7.55087	1.08131	-12.8383	-26.8508	-9.66875	-3.29197	2.9698	1.68301	1.15386	4.27911	-2.9858	1.93249	4.49464	-1.50178	5.34392	-0.0814685	-17.3217	-12.8919	-14.3255	-13.5464	-22.9822	-8.76905	-14.0369
ACC__TCGA-OR-A5JI	-16.6843	0.459077	2.36977	-1.90102	-0.0280613	5.10419	2.60052	-2.71329	-3.4518	0.851011	-3.5271	3.0509	-8.70234	5.77095	-5.45439	-0.654503	1.96472	3.80141	-4.72202	-3.82099	-6.82129	3.18042	-3.88137	-10.3405	-10.6422	-9.80976	3.77655	-3.39853	0.762045	-1.36427	-0.77899	6.53124	7.919	-6.66562	-8.54399	6.6165	5.77279	6.08908	7.61587	-0.285556	7.28451	7.8393	-6.83424	-4.24072	-3.01125	-8.0132	-8.58332	-4.56771	-5.13797
ACC__TCGA-OR-A5JJ	-48.7671	-1.20163	0.372579	-0.553202	9.57166	13.8162	9.38004	5.09099	4.29785	5.3797	1.56747	4.09564	8.16876	4.00658	12.7731	-3.55314	-1.70862	5.73489	5.5038	17.4872	11.2953	7.31572	-2.28246	2.18914	6.69986	0.962264	-5.51189	5.52469	-5.19394	-6.82339	-3.88166	-1.77865	1.50516	0.295949	0.991908	3.39831	-2.82836	1.69292	3.77157	-2.76379	4.69553	-2.78421	-23.1597	-18.7527	-22.7492	-18.5561	-31.8437	-13.3334	-19.3127
ACC__TCGA-OR-A5JK	-22.419	0.416116	4.68356	1.10892	0.113	4.2318	2.60074	-0.839139	-0.789018	2.14298	-1.95893	3.09434	-4.98692	3.3295	-2.30896	4.82153	6.27919	0.909901	0.517981	-0.615069	-3.64637	-6.12115	-2.2646	-7.30558	-6.40606	-6.06486	4.05606	-0.769994	-0.108879	3.01255	0.863865	7.21262	9.16481	4.02051	-4.27751	7.6205	6.34351	7.42955	9.79205	5.29796	9.11724	7.40725	-5.33671	-1.24856	-4.52514	-1.45059	-3.90795	-1.03588	-1.80912
ACC__TCGA-OR-A5JL	-24.4542	-4.42033	-1.22784	-3.56974	3.33438	6.99218	3.156	0.0149231	0.604526	-0.201827	-2.12887	-0.958382	2.68192	2.46353	9.15185	-0.907023	1.85041	7.16552	1.42041	13.448	6.2982	14.3065	-3.67578	4.0417	0.711274	-2.32661	-3.82277	-0.4361	-7.34349	-7.7791	-5.44714	1.56732	5.16897	2.48032	-0.154938	7.67167	1.14844	4.51133	6.13595	1.24563	8.12928	3.23643	-15.2774	-8.94134	-10.908	-10.5771	-20.3645	-5.26562	-9.60945
ACC__TCGA-OR-A5JM	-36.8335	-4.91131	-2.62883	-2.79525	7.63337	11.2539	6.77056	2.34423	5.32404	1.91129	-3.88011	-0.10881	9.35292	0.355033	15.3722	-3.3758	-3.81745	11.0423	5.96534	18.768	20.1121	17.2047	-2.7053	6.86585	9.54482	2.42972	-10.1885	3.56115	-12.1136	-12.4242	-7.94438	-3.72155	3.7304	5.92657	4.11648	2.44124	-2.27762	3.70239	6.85644	-1.06834	5.4543	-0.551353	-17.2851	-18.1062	-22.4821	-19.7634	-35.6369	-13.6453	-17.7356
ACC__TCGA-OR-A5JO	3.16942	-11.4207	-5.91962	-9.52161	-6.22982	-4.71682	-5.46824	-5.78962	-6.73115	-5.59584	-15.0328	3.42627	-15.7762	2.65122	-14.2641	-2.39516	-0.89729	-1.76109	-0.970161	-7.95686	-11.096	1.10077	-9.61193	-8.29382	-9.80477	-9.13016	6.22862	-8.30861	5.29537	-11.0001	4.94712	6.41271	6.43068	-0.589337	-9.32694	7.45329	5.40619	6.18076	5.95021	5.05667	5.5819	5.8196	-8.286	-12.9155	5.62695	-23.789	5.08062	-3.2226	-7.01299
ACC__TCGA-OR-A5JP	-36.2596	-3.69294	-0.949269	-2.63037	6.74384	13.3823	7.96637	1.62216	1.9114	2.46565	-2.71468	1.59488	5.7743	1.77692	13.3657	-4.1428	-3.76308	10.2846	2.72559	15.7566	9.97315	12.5811	-3.75181	3.16424	3.78244	-0.622708	-6.73378	3.95113	-11.5927	-12.2085	-8.15461	-2.94851	0.40522	1.32849	-0.479878	2.83159	-3.93448	0.468295	2.61861	-4.5915	2.90256	-4.01509	-17.2278	-14.4155	-15.8496	-14.737	-24.7593	-10.6009	-15.2861
ACC__TCGA-OR-A5JQ	-12.7149	1.38348	2.61668	-0.607908	-0.329121	4.87834	2.86945	-2.87421	-2.48176	1.11459	-0.893483	3.82078	-3.97963	6.18332	-1.7209	3.92698	5.19827	4.94015	0.734699	0.411089	-2.16441	1.42279	-1.13747	-0.679873	-4.0301	-4.44287	4.05123	-0.350577	0.841101	0.826209	0.284276	6.40316	6.69045	-1.92287	-4.81999	5.77505	4.87747	5.18263	6.55373	-0.532575	6.96707	6.05219	-3.43151	-2.30843	-2.97877	-5.47194	-9.20416	-0.690262	-1.51566
ACC__TCGA-OR-A5JR	-13.8512	-1.80748	-0.00642526	-1.90583	0.0180986	4.53432	2.59242	-1.94848	-0.140889	0.140366	-2.30629	0.666231	-2.56836	3.12232	1.95837	0.0467035	1.35125	4.88255	-1.60161	2.841	0.217803	9.5385	-2.81388	0.0486174	-2.38739	-4.47362	-0.629767	-2.25813	-2.64244	-2.42094	-1.12762	5.62999	9.58963	-1.47089	-3.17683	7.90888	4.9794	8.05476	10.776	0.587209	4.01485	4.08241	-18.2643	-6.02648	-6.87554	-8.35485	-13.0511	-3.18262	-5.88823
ACC__TCGA-OR-A5JS	-39.463	-3.00931	-1.42367	-2.32222	6.95493	9.34639	5.67837	3.01225	3.23149	1.27194	-2.75935	0.0922666	7.00248	1.59571	11.9107	-3.08631	-2.19964	5.5334	4.24301	15.6568	10.1619	11.4014	-3.47336	4.17972	6.78317	1.76901	-8.06903	1.67056	-7.78565	-8.92428	-5.15389	-2.07699	3.75704	2.59564	1.30149	2.99212	-1.98895	3.39115	5.91719	-0.417682	6.13824	0.560685	-19.0097	-17.8093	-20.3288	-20.0153	-35.1112	-16.4188	-17.6406
ACC__TCGA-OR-A5JT	-22.1264	-3.77141	-1.18137	-2.96963	3.19838	7.50375	3.95058	-1.47011	0.615724	-0.124789	-3.02621	-0.221102	0.582955	2.53354	6.11729	-1.07297	0.537223	7.26149	0.757462	11.4887	5.36741	14.6967	-3.43506	0.594481	-0.431861	-3.77898	-5.85432	-1.95001	-7.40204	-7.8522	-4.4064	0.0538235	5.23287	1.84734	-2.66978	4.66228	0.0215455	4.37503	6.58249	0.17707	4.67888	3.82668	-16.8629	-13.7544	-14.2443	-14.8965	-25.4023	-8.48489	-13.2857
ACC__TCGA-OR-A5JV	-18.151	-1.98903	1.88435	-1.50251	-0.0324508	3.68263	1.96111	-2.71434	-6.03856	0.453505	-4.72291	0.848373	-5.69323	1.97301	-2.63141	-0.370067	0.779893	2.52718	-0.601967	-1.77099	-4.00606	0.311507	-3.37011	-0.894206	-8.88489	-8.36676	3.64212	-9.26271	-18.6196	-16.3551	-0.527278	6.06472	8.59373	-4.05782	-5.09873	6.50295	5.21546	5.82961	8.32398	-1.94505	0.715468	-0.0780106	-6.94504	4.46521	4.16503	4.88314	4.77704	7.71912	5.79773
ACC__TCGA-OR-A5JW	-20.5768	-6.50576	-2.8366	-5.17459	0.15764	4.71946	1.35234	-2.78195	-0.0600848	-3.0008	-8.04901	-3.05417	-0.914914	-0.149598	5.7571	-1.22242	0.555483	7.19745	-0.0993899	9.29869	5.32267	18.3533	-5.94851	-0.260146	-3.52842	-6.13392	-6.99108	-4.16197	-11.7986	-25.2967	-7.51325	1.34679	8.38017	2.16832	-1.76156	6.70389	1.92981	6.76537	9.61101	1.85239	6.87639	5.68104	-13.0059	-10.17	-11.5977	-11.2245	-19.7369	-5.54945	-9.5465
ACC__TCGA-OR-A5JX	-26.4309	-5.29026	-0.396437	-4.86249	1.59385	9.13046	4.16652	-1.39051	-1.29815	-0.683361	-8.31697	0.590778	-7.36111	1.89097	-0.66961	-1.58109	2.41704	5.30975	-5.67099	1.80705	-1.27954	11.4547	-6.97199	-4.17685	-5.29775	-7.055	-4.66873	-4.78373	-7.35396	-8.58515	-4.36379	3.46482	8.504	-3.61626	-6.30469	6.87324	1.19404	6.50256	8.91956	2.98102	7.26328	5.46865	-14.9536	-12.5326	-11.662	-10.9137	-16.4959	-9.33145	-9.73457
ACC__TCGA-OR-A5JY	-18.1676	-3.73229	0.070162	-2.29102	2.41618	5.34082	2.7105	-0.710272	2.17441	-0.240744	-3.64005	-0.0623634	3.30011	1.18019	7.7368	1.96436	2.07562	7.71636	8.32838	17.3736	14.782	11.2132	-2.68463	3.92701	2.93541	0.291065	-4.13797	0.0854831	-7.42556	-7.04738	-5.54125	2.41358	6.6109	5.22239	2.0758	5.5744	3.06665	7.00746	9.1656	1.04362	6.76854	3.53266	-9.56913	-6.00867	-7.93638	-7.26676	-17.6992	-2.46773	-7.2422
ACC__TCGA-OR-A5JZ	-17.44	-3.20348	-0.524095	-1.69572	-0.979801	3.69451	1.5084	-2.94766	-0.785799	-0.339459	-1.60968	-0.946596	0.069068	2.5957	3.32174	0.374858	1.98617	6.93832	0.0982472	8.10456	3.5193	12.5192	-3.03122	-0.343631	0.0352913	-3.30765	-28.8302	-2.15976	-5.0829	-5.6635	-3.57107	2.57886	4.31767	0.377966	-1.81169	4.66398	1.62746	8.3287	5.78056	1.80111	5.25934	4.44864	-11.4776	-8.61773	-9.76624	-8.41583	-17.4288	-2.65156	-6.14082
ACC__TCGA-OR-A5K0	-35.1312	-3.38872	-0.851584	-1.36446	5.51453	10.136	5.81516	2.23704	3.36975	1.80709	-2.59727	1.04503	4.66601	2.24308	8.50606	0.699383	1.80828	5.43605	6.19346	15.6756	10.781	9.16272	-4.1391	-1.78964	0.361022	-2.74495	-7.36262	-0.758115	-7.5467	-8.77521	-5.83747	1.98939	8.30983	4.73181	1.47554	6.75233	2.27631	8.15428	10.7415	2.55306	6.69763	3.80365	-17.1306	-15.694	-18.7192	-16.3615	-26.8703	-12.4269	-14.6391
ACC__TCGA-OR-A5K1	-28.993	-3.71508	0.337654	-2.94167	1.96116	5.34205	2.39763	-0.899503	-1.40035	0.173727	-2.69247	-0.292651	-0.569219	1.58486	3.55884	-0.581936	0.898284	7.34194	6.79299	8.51642	3.2144	9.75417	-4.19535	0.143653	0.265629	-3.19649	-3.6381	-1.33919	-4.46502	-5.02803	-3.52192	0.547525	2.41161	-1.80216	-3.05337	3.48558	0.204673	1.74391	3.46353	-1.82267	4.82541	0.0726877	-15.2615	-10.2415	-10.5925	-12.4672	-22.3527	-7.31008	-10.8459
ACC__TCGA-OR-A5K2	-23.4446	-6.029	-1.64589	-4.48863	3.20416	8.16952	3.39426	0.563378	-1.49669	0.037064	-5.15803	-0.640188	2.2523	-0.0953846	9.10336	-3.28196	-3.05439	6.06549	1.22225	12.8548	8.29015	11.0422	-4.79888	3.71535	3.27718	-0.427523	-6.38243	0.877989	-11.6027	-27.8133	-7.93021	-2.62719	0.107898	0.453284	0.0541274	3.23416	-2.68723	0.474863	2.22132	-2.30429	5.85729	-2.16538	-12.3514	-8.71064	-9.80195	-9.7157	-14.9702	-6.86367	-10.2061
ACC__TCGA-OR-A5K3	-13.674	-6.13391	-2.45122	-5.246	-0.35788	4.99175	0.984619	-2.83596	-3.47305	-1.67939	-5.02422	-1.2936	-2.63033	0.758558	4.61938	-0.771852	0.642612	3.08212	-0.306785	6.25132	5.30308	8.38381	-6.11278	0.563478	-1.70087	-3.26444	-26.9226	-3.23731	-24.4546	-24.0893	-6.92327	0.42176	4.42604	0.482567	-1.68836	6.02262	0.196149	3.4158	5.25969	-0.639388	5.55217	1.84658	-12.6804	-8.99573	-7.2342	-7.13491	-12.0544	-2.70003	-7.6037
ACC__TCGA-OR-A5K4	-40.2216	-5.49438	-2.59271	-2.7876	5.0667	9.8523	5.34557	1.18249	3.22326	0.881676	-3.46088	-0.927342	7.41484	1.27429	13.3212	-3.83073	-2.85654	9.43641	3.55585	16.5943	10.1821	16.875	-2.2224	5.53177	6.16194	0.133705	-8.84549	2.7377	-10.3706	-11.3651	-6.93398	-3.49313	4.38036	2.74965	0.0122772	4.74606	-2.27765	3.73093	6.82934	-1.54264	4.43419	0.0406829	-23.7887	-20.7107	-24.3493	-19.1744	-32.2402	-12.3312	-17.8703
ACC__TCGA-OR-A5K5	-32.9755	-4.57907	-0.200004	-3.36698	6.63783	13.29	7.50135	1.67619	0.13524	1.22145	-4.07501	1.71539	3.11668	1.76756	8.65708	-3.30148	-2.54873	7.5973	2.16338	13.2285	9.11291	13.1267	-5.71077	1.98473	4.28459	0.381688	-7.107	0.687531	-9.81447	-10.9209	-8.15777	-2.16509	1.86778	1.01892	-0.301495	4.5485	-2.83475	2.24017	4.00607	-0.818699	6.24334	0.158236	-17.3355	-16.2422	-18.2227	-15.8751	-27.0191	-12.1252	-15.3676
ACC__TCGA-OR-A5K6	-19.1939	-4.37748	-2.03528	-3.88432	2.83676	8.11349	3.68809	-0.276904	-1.32492	-0.729845	-4.46412	0.117096	0.407972	1.99579	6.84484	-2.10118	-0.114013	7.41386	1.56484	9.63455	6.2266	14.2783	-5.52016	0.759041	-0.730106	-2.99012	-4.79605	-1.93171	-8.27137	-22.7025	-6.13504	-0.118396	4.70849	0.307609	-2.78236	5.83708	-0.857773	3.80055	5.78499	0.356992	7.49569	2.19511	-15.2535	-11.4949	-10.2967	-11.8464	-19.2066	-7.886	-12.7667
ACC__TCGA-OR-A5K8	-32.1798	-5.38248	-1.77035	-4.02961	3.23447	7.57666	2.68436	0.268418	0.299159	-0.120892	-3.61907	-0.723344	2.17373	1.73643	7.26696	-3.40197	-1.92199	4.49909	1.04713	10.1436	5.72424	11.1385	-4.76915	1.25652	2.26108	-1.85739	-5.88954	0.158593	-9.13568	-9.63526	-5.81381	-2.14852	1.98318	-1.49162	-2.78346	3.08333	-2.65847	0.909432	3.00384	-2.28412	3.90628	-0.631924	-14.8204	-13.0039	-15.6565	-14.8924	-23.7955	-9.45309	-13.7445
ACC__TCGA-OR-A5K9	-26.398	-5.06395	-2.04821	-3.15615	5.03264	8.8766	4.84861	0.302252	2.35381	0.35507	-3.68858	-0.018061	5.50769	1.07604	11.1617	-2.30159	-2.0256	11.2422	4.52639	17.2973	11.6284	15.677	-2.87122	3.54361	3.95277	-0.667824	-7.81328	2.7264	-12.5491	-12.0209	-7.38076	-2.34437	4.62438	4.83828	0.960516	3.91337	-1.10165	4.5598	7.23376	-0.707509	5.98861	0.774104	-16.7666	-15.1173	-16.9008	-15.7231	-26.5674	-11.0349	-15.2924
ACC__TCGA-OR-A5KO	-40.5221	-6.90721	-4.19768	-4.63322	3.92466	8.5473	4.06849	0.433848	3.43326	-0.332556	-3.52652	-2.86157	9.86755	1.23831	15.5419	-5.40552	-5.17733	11.5847	5.26957	21.0418	13.3739	19.8507	-2.62288	6.24403	8.27178	1.45522	-10.3932	4.59233	-13.454	-13.3857	-9.06565	-5.52074	2.24069	3.51242	1.8434	1.03601	-4.69654	1.30769	4.2753	-2.5001	3.99187	-1.63399	-20.863	-20.1086	-24.4445	-22.35	-38.3113	-15.4657	-21.0255
ACC__TCGA-OR-A5KT	-14.1223	-3.24958	1.48063	-4.44793	-0.583385	3.16725	1.82849	-3.39042	-8.71433	-0.997967	-2.63071	1.35876	-7.32155	1.82796	-4.98814	5.12324	7.45005	10.519	0.165121	6.35155	-1.16979	7.55798	-4.68876	-7.77564	-8.45087	-7.04627	4.07337	-1.82389	-0.654585	-2.04059	-2.55551	8.0177	6.65312	4.53227	-2.80882	7.76727	6.25536	6.58114	6.32871	1.70649	8.3184	2.41739	-6.06506	-2.98737	3.45508	-3.82442	-4.45301	0.38062	-5.06087
ACC__TCGA-OR-A5KU	-39.8024	-3.94698	-0.395842	-4.01789	5.62611	11.6575	6.39046	0.00223849	0.667733	0.169667	-3.92209	1.19624	0.612087	3.23461	6.76755	-3.69602	-0.813222	7.15354	-0.424386	11.8857	5.9565	12.9636	-4.73703	-0.471042	-0.145142	-3.3515	-7.17039	-0.597853	-7.24432	-9.2226	-5.38039	-0.981102	4.696	-1.26061	-3.63458	3.87789	-1.82923	3.32992	5.9163	0.313667	5.09536	2.1636	-19.8713	-18.224	-20.6383	-18.5999	-31.0107	-13.1992	-15.6982
ACC__TCGA-OR-A5KV	-47.8743	-3.23722	0.4182	-3.07756	9.24071	19.2619	12.1242	2.34131	1.22169	3.81455	-2.57542	4.5552	2.64104	4.07096	11.0809	-5.74143	-2.94231	9.35608	-2.52977	11.0993	6.55842	10.527	-5.10966	-0.290508	0.927685	-3.99262	-7.15617	3.40412	-9.74954	-13.2018	-8.41039	-2.84367	2.4708	-3.82684	-4.09222	6.5395	-3.69699	2.17633	4.0587	0.437722	5.32654	0.916075	-24.9076	-22.4083	-25.4332	-20.1948	-31.0349	-16.0488	-19.7427
ACC__TCGA-OR-A5KW	-38.5355	-6.24825	-2.92508	-4.20103	3.81719	9.43809	4.62495	0.0679827	1.17172	-0.452722	-2.80561	-1.03263	5.08157	1.88296	11.4767	-3.66644	-2.684	6.02481	2.1547	14.6433	9.17703	10.9975	-4.39084	1.13035	2.32337	-1.51724	-9.27867	0.618296	-11.7514	-12.7099	-8.84545	-2.61165	3.96412	1.97254	0.0176079	4.11636	-2.05291	3.30876	5.39051	-0.981314	5.37873	0.524002	-19.2086	-17.0692	-18.7331	-17.291	-30.3056	-12.1176	-17.4849
ACC__TCGA-OR-A5KX	-34.0662	-5.6882	-0.923856	-2.91314	4.93546	9.10318	4.74819	1.05803	1.48334	0.744539	-5.01243	-0.854755	2.83427	1.65468	8.25343	-2.99219	-0.0979503	9.29781	2.32132	15.573	10.1953	16.3802	-3.97881	3.18534	2.16266	-1.74921	-5.78228	-0.543335	-8.87328	-9.73689	-6.90697	-0.513557	6.25049	1.88766	0.00220451	6.87765	-0.886287	5.33454	8.07664	0.533822	6.02751	2.69669	-18.4466	-16.4771	-17.0086	-15.7344	-23.9565	-9.50911	-14.5353
ACC__TCGA-OR-A5KY	-25.8504	-5.01863	-2.20988	-3.35845	3.56984	9.14608	4.77236	0.0342891	0.898729	0.0134237	-3.20117	0.347594	5.09254	0.582109	10.1185	-3.92761	-4.78098	8.23684	3.05206	13.2553	9.3579	10.5395	-3.30799	4.31663	4.74267	1.07381	-6.36446	3.33422	-12.1988	-12.9914	-9.07243	-3.44879	-2.57296	0.0711959	0.353928	-0.308093	-4.60014	-1.82412	-0.465912	-4.68374	1.7247	-4.78469	-12.6628	-9.06915	-11.0746	-10.5011	-17.0171	-7.01544	-12.0801
ACC__TCGA-OR-A5KZ	-32.6992	-2.72461	-2.02366	0.177223	6.05638	9.48856	5.26102	3.94919	5.97231	3.53697	5.84247	1.38623	16.9448	2.82245	24.9599	-2.32709	-3.65267	11.3908	10.8025	24.8704	20.2634	13.7103	1.35189	7.56879	7.98304	2.75837	-4.59302	7.07068	-8.578	-8.49541	-6.46302	-3.66792	1.47915	6.52038	3.47414	1.63717	-2.66922	2.12224	4.6375	-3.89589	3.53404	-3.25942	-14.4666	-10.0332	-12.7227	-14.3997	-22.6306	-8.2292	-12.8607
ACC__TCGA-OR-A5L3	-25.6796	-3.59645	-1.3596	-3.81998	4.02123	10.348	5.18062	1.091	-0.641091	0.683664	-6.7741	1.55382	-3.93217	2.42602	3.60845	-4.11532	-0.131642	4.75675	-5.38093	1.9281	0.531175	12.8613	-6.81159	-2.70181	-4.1433	-5.78986	-4.94755	-3.97533	-8.29654	-9.45411	-4.37993	-0.824423	5.92112	-4.51924	-5.00554	7.50791	-1.46591	4.26759	7.00814	2.72822	8.88447	4.64111	-19.4597	-17.1466	-14.6444	-15.9747	-24.1988	-11.685	-15.9051
ACC__TCGA-OR-A5L4	-24.7913	-7.70095	-3.25226	-6.00816	0.326646	4.74001	0.721118	-2.87904	-1.64068	-3.15811	-4.79711	-3.99691	3.54694	0.216795	9.25794	-2.1553	-1.50567	11.0926	2.8132	15.4006	8.58092	17.5858	-5.30059	4.00984	2.35189	-1.64108	-30.6841	-0.997688	-11.1275	-25.35	-8.57547	-1.57569	3.70137	2.66504	-0.932206	4.04509	-0.6532	3.39779	5.08796	-1.13303	4.45214	0.760512	-12.4297	-7.85514	-9.71092	-12.8173	-22.2779	-7.21244	-9.66892
ACC__TCGA-OR-A5L5	-13.3769	-0.6538	1.54644	-3.6626	-6.80845	5.60873	2.87506	-8.01672	-8.56124	-0.0463041	-4.61984	2.86807	-12.1883	3.7412	-6.54928	4.77855	7.74483	5.27846	-5.51094	-4.48393	-7.22419	2.98131	-6.2812	-11.8813	-12.7062	-11.8184	4.33277	-5.30635	1.52639	0.371083	-0.611004	7.83747	11.6671	-4.26212	-8.25481	10.2839	6.56364	8.82009	11.0223	7.88359	10.5935	11.5944	-11.3088	-7.34307	3.82487	-6.26766	-8.31497	-3.43115	-6.39365
ACC__TCGA-OR-A5L6	-21.5396	-4.80031	-1.07614	-2.50778	2.33313	5.94458	2.32663	0.339013	0.328481	0.420359	-2.5895	-0.462758	0.942552	1.88517	4.17723	-1.08849	-0.00142925	7.06911	0.135412	7.52824	3.538	10.5507	-3.53734	1.44008	0.306648	-2.51661	-2.29252	-0.472109	-6.34313	-6.7298	-4.8065	-0.933011	1.38844	-1.16202	-2.34188	3.96075	-0.465701	1.25928	2.5794	-1.8129	4.81006	-0.672264	-14.1389	-8.89632	-9.7935	-11.328	-19.2466	-5.51132	-10.2699
ACC__TCGA-OR-A5L8	-46.5178	-2.58291	-1.19644	-1.60263	8.38331	14.5818	9.91554	2.09905	4.79482	2.50153	-3.54654	2.07865	4.6036	3.54013	10.9377	-5.63462	-2.46539	8.87207	0.207908	14.9121	8.62059	17.0232	-3.92247	1.56985	1.23819	-3.52122	-7.19934	1.20132	-7.55673	-9.58346	-4.01642	-2.25291	6.36974	-0.247647	-3.13359	4.65936	-1.72294	4.57843	7.44402	0.56789	4.30253	1.76661	-23.1441	-21.6805	-23.0253	-21.7154	-36.2121	-16.6023	-20.3174
ACC__TCGA-OR-A5L9	-18.6507	-1.96788	2.04117	-1.40183	0.311999	5.45396	2.5192	-1.80363	-6.48391	0.833153	-3.20983	1.77795	-6.85405	3.35418	-3.99776	0.26229	1.34787	2.74534	-3.5793	-3.98725	-5.50801	0.625482	-3.51176	-8.39885	-4.66957	-5.09526	3.55649	-2.31068	0.28464	-0.516183	-0.486799	2.79086	0.629229	-4.91054	-7.13418	2.90707	0.755536	-0.648226	0.273427	-0.129114	2.14245	0.950688	-8.8931	-6.00744	-4.09813	-3.90828	-6.02004	-0.417025	-5.02864
ACC__TCGA-OR-A5LA	-12.6546	-0.492336	2.83112	-3.2316	0.113849	5.84349	2.91582	-2.06767	-7.46245	0.725265	-4.13025	3.54729	-9.55991	3.36697	-4.79171	4.73013	6.99228	3.81068	-3.86116	-4.00226	-6.11847	1.49041	-4.86571	-9.19837	-6.31566	-5.97734	3.87313	-3.83439	1.31317	-0.581975	-0.180235	6.87889	8.83049	-4.21361	-6.93396	8.50263	6.42645	6.81818	8.32689	1.5432	9.1144	7.9689	-8.58576	-4.16054	-0.655989	-5.02791	-8.15187	-0.526283	-3.56065
ACC__TCGA-OR-A5LB	-34.5944	-6.25476	-3.02745	-5.16273	5.0944	10.7245	5.64039	-0.310039	2.26892	-0.932306	-6.73079	-2.19072	4.41002	0.503145	11.561	-4.77638	-2.97333	9.55854	1.10386	15.6932	9.87174	18.32	-4.92954	3.88856	1.79217	-2.54595	-9.59822	0.354647	-13.6829	-13.7839	-8.7237	-3.81104	5.44327	-0.0840957	-0.508698	5.09832	-1.86032	4.05792	6.72724	-0.636093	5.43992	1.28925	-20.5273	-18.7315	-20.3231	-20.4163	-33.5086	-14.1722	-18.4335
ACC__TCGA-OR-A5LC	-32.5803	-5.85415	-2.38562	-2.68929	6.26773	11.1977	6.08852	1.9081	1.48951	1.47564	-2.71145	-0.133677	6.8066	1.96387	11.0648	-3.178	-1.76181	10.5846	2.43096	12.7704	8.66904	14.3985	-3.03094	4.05595	5.53557	0.539574	-8.45207	4.23572	-13.0052	-27.0574	-9.77323	-2.72184	2.44768	2.74741	1.07963	3.28548	-3.48928	2.39124	4.38559	-2.30753	4.33475	-1.69719	-15.522	-12.3803	-15.1639	-14.5831	-23.1488	-9.53649	-13.9993
ACC__TCGA-OR-A5LD	-43.1841	-3.82453	-0.384447	-0.191812	8.29655	13.6982	8.76044	4.34165	6.14354	4.02579	-3.39272	1.86961	8.22366	2.2435	12.444	-2.58187	-2.08535	9.09275	4.48181	17.209	12.0431	12.6679	-1.45398	4.61155	6.03847	0.427379	-6.97243	6.28836	-9.14604	-10.7433	-6.75378	-2.9568	3.85337	3.41715	1.09946	4.754	-1.01598	4.62599	7.2577	-0.857836	4.6127	-1.35863	-20.2359	-17.2351	-21.7872	-17.4396	-28.3714	-12.0565	-15.7542
ACC__TCGA-OR-A5LE	-40.4906	-4.50825	-1.98676	-1.72039	7.17989	12.2332	7.4697	2.65324	5.96961	2.80905	-3.12813	0.514679	7.79413	1.71085	14.3546	-1.4691	-1.41664	9.03642	6.92746	20.7498	14.8285	14.0629	-2.70185	5.48321	8.40414	2.07969	-9.95478	4.37126	-12.8812	-12.597	-7.91414	-1.064	8.41271	6.79174	3.82211	6.59102	0.711375	7.89503	11.9649	0.873736	8.63611	1.83303	-17.8864	-15.8615	-21.5216	-15.7057	-30.7089	-11.2962	-15.4486
ACC__TCGA-OR-A5LG	-16.1104	-3.48373	-1.29512	-4.29591	0.65183	5.42287	1.60008	-1.7272	-3.16615	-0.949019	-2.07071	0.640815	-1.06186	2.15268	4.5472	-1.44654	0.655517	5.97442	0.0865641	7.82162	5.35425	11.6363	-5.40072	0.330059	-1.25843	-3.36436	-2.76603	-2.24535	-8.42933	-22.2961	-5.42745	-0.0141747	4.33372	-0.0139001	-1.70964	5.31171	-0.160522	4.19478	5.45778	1.60705	7.52094	3.32307	-12.3669	-10.0023	-7.48426	-12.735	-17.8826	-6.12526	-11.1179
ACC__TCGA-OR-A5LH	-26.9772	-3.16772	0.7082	-4.26315	1.20314	7.98436	3.37448	-2.19235	-3.71195	-0.595553	-4.53285	1.77697	-5.99518	3.58022	1.52241	-1.5529	2.20615	4.70269	-5.14596	2.44782	-2.19974	8.23106	-6.66196	-4.49558	-5.329	-6.77515	-1.4854	-4.1368	-4.08257	-5.58012	-3.85317	2.30213	6.46294	-4.94857	-6.57871	7.29801	0.560935	4.18482	6.41156	0.99809	7.56401	3.81294	-16.204	-12.4116	-11.6594	-11.8348	-18.7269	-8.2505	-10.814
ACC__TCGA-OR-A5LJ	-39.4283	1.15379	1.38339	1.37783	6.98259	12.0213	8.46632	3.19812	3.30571	3.80889	1.27938	4.76005	3.94166	4.48854	6.68561	-2.84751	-1.22557	3.46582	2.03982	8.89872	6.25395	3.6653	-2.18642	1.36926	2.76634	-1.71798	-2.19881	3.20239	-2.8207	-4.73282	-2.45371	0.371167	1.71504	-0.547687	-1.16615	2.23809	-1.8253	1.48239	3.01052	-1.90006	2.94051	-1.91273	-18.0853	-13.7044	-18.3979	-14.2435	-24.2776	-11.7658	-12.7219
ACC__TCGA-OR-A5LK	-15.8614	-8.72353	4.5832	-8.45337	-5.4433	3.85792	2.16717	-5.62654	-5.82246	-4.47664	-3.2643	3.55817	-15.2214	2.49518	-12.0024	-7.6005	5.52464	4.27457	-6.49652	-11.7343	-11.7295	-4.85404	-9.23094	-8.46948	-10.1294	-8.62546	4.58366	-8.95718	3.85249	2.7099	4.04689	5.71206	7.47771	-8.62779	-8.57104	7.2153	5.45087	5.73777	6.67856	-0.873983	7.07702	-0.350836	-13.0324	3.70269	4.32169	4.34662	4.60138	6.63641	4.47524
ACC__TCGA-OR-A5LL	-23.123	-3.92894	-1.26255	-5.24037	-0.370671	4.84461	1.52591	-4.14216	-2.25526	-3.61824	-6.87889	-1.13447	-4.07479	2.37778	2.40104	-1.99524	0.978252	4.65053	-1.93693	6.48751	1.45418	13.2566	-6.9952	-3.85956	-6.40978	-8.15599	-4.95727	-6.62077	-7.57981	-8.41464	-4.02686	1.11369	9.21684	-0.862822	-5.0227	6.73625	2.12571	7.45377	10.39	3.85985	7.99916	6.70511	-14.9804	-13.2162	-11.6961	-14.2195	-23.8834	-10.5907	-11.8961
ACC__TCGA-OR-A5LM	-28.9703	-6.62377	-2.51737	-5.17256	2.97147	8.31445	3.28754	-0.9625	-0.903896	-0.758889	-4.52596	-2.06309	1.45151	1.15248	8.62007	-2.90329	-0.905535	5.56562	-0.3624	12.4864	7.49781	12.4827	-5.98878	0.925707	0.309373	-2.26597	-7.20257	-1.1434	-11.3751	-11.5246	-8.28998	-0.977239	5.37689	0.473083	-0.726106	7.19315	-0.759034	4.0613	6.17692	-0.359547	7.19462	1.63328	-17.022	-13.2592	-16.1077	-12.7942	-22.2626	-6.80557	-11.7662
ACC__TCGA-OR-A5LN	2.25833	-10.1308	-4.43725	-8.13524	-5.2381	-3.8591	-4.55009	-5.52759	-5.04349	-4.55542	-14.0551	-7.36443	-11.2867	-2.5767	-8.21297	3.70457	5.17788	2.04444	-2.93396	-4.34039	-5.7908	3.11915	-9.67838	-1.39774	-6.97545	-6.03081	3.17447	-8.66815	-12.0018	-12.4584	-0.298939	5.21219	10.1402	-1.12709	-7.37318	7.91983	5.32084	7.92597	10.1444	5.96787	9.17549	9.13486	-16.7252	-17.8463	2.82851	-31.2983	-37.2642	-10.7562	-6.64718
ACC__TCGA-OR-A5LO	-48.2104	-4.33243	-1.43579	-3.19022	6.60083	13.2461	8.07036	1.21181	4.11771	1.4713	-2.35332	1.24518	7.95466	2.96356	13.7495	-3.65078	-2.97206	10.2051	5.39904	19.6103	12.0706	15.1046	-2.08838	3.534	5.32214	-0.385485	-10.3987	4.57735	-10.1187	-11.6793	-8.02791	-2.45807	4.68617	2.46047	0.661557	3.7055	-2.13012	3.7115	6.52228	-2.22899	3.24858	-1.21219	-21.7524	-20.3952	-26.1216	-20.1135	-35.3182	-14.71	-18.7846
ACC__TCGA-OR-A5LP	-11.4956	-1.10627	1.2812	-2.77292	-0.866018	4.52487	2.53433	-3.88181	-4.06813	-0.716226	-4.74498	1.97309	-9.9191	3.67279	-6.02497	1.20829	2.92615	6.16066	-5.16352	-6.04201	-8.13927	5.04064	-4.85288	-11.0901	-11.811	-10.709	3.86403	-11.1834	-1.51974	-2.17735	-0.320925	6.69962	5.53425	-3.6733	-8.14804	7.56592	5.60414	7.2356	5.47714	1.54053	4.92915	5.18038	-5.89319	-1.01818	3.79006	-4.14141	-4.73418	0.0488079	-2.72551
ACC__TCGA-OR-A5LR	-22.7434	-3.97315	-0.332148	-4.18936	0.725486	6.18597	2.85799	-3.65466	-2.34224	-1.40055	-4.87901	-0.00948682	-4.04472	1.94223	1.98376	-2.25278	0.350777	7.07639	-3.55119	4.80583	0.763647	11.7344	-5.53635	-2.37301	-3.39991	-5.66019	-3.37914	-3.39928	-6.34162	-7.56366	-4.88776	-0.14968	5.0505	-2.83139	-5.45859	5.16556	-0.591633	3.54175	5.98329	0.58016	5.0884	3.66802	-14.4776	-12.0399	-9.191	-11.1995	-18.4031	-6.31515	-11.7298
ACC__TCGA-OR-A5LS	-38.4228	-4.52388	-2.80504	-3.88052	5.92248	9.96063	6.07401	0.576742	2.72222	0.323435	-5.6434	-1.5256	4.43005	0.629886	10.6691	-1.86034	-1.11089	7.29663	3.98232	17.0167	10.353	16.4375	-4.14717	4.54245	2.7814	-2.01165	-6.53581	0.480485	-11.3451	-11.0531	-7.26728	-1.20569	4.88162	3.72223	0.421795	5.4997	0.430861	4.88039	6.39453	-0.673037	5.98981	1.48184	-20.2262	-16.0365	-21.1089	-18.8557	-32.3509	-12.2663	-15.2932
ACC__TCGA-OR-A5LT	-19.6973	-4.09703	-2.49585	-2.45224	3.10295	6.47997	2.78063	0.0191506	3.04455	0.0359564	-3.59199	-1.29978	2.38801	1.29429	6.58594	-4.27034	-3.00002	6.33422	-0.174922	9.18734	4.90585	15.5164	-2.43535	2.12794	1.42126	-1.36846	-4.92927	-0.694121	-8.27482	-8.45836	-4.84224	-2.54306	2.87962	-1.51654	-2.80013	2.70415	-2.07536	2.51801	5.0313	-1.86553	3.16899	0.601114	-16.3547	-12.4318	-14.452	-15.8817	-24.9704	-9.33428	-13.8684
ACC__TCGA-OU-A5PI	-30.4624	-4.07233	-1.63121	-4.06463	3.01179	8.55242	4.44914	-1.32078	-0.318858	-0.914002	-4.56804	0.183492	1.10778	2.41665	6.38726	-5.21477	-3.01461	7.37236	-0.547625	9.88389	4.58908	12.6614	-4.18662	-0.163205	-0.745008	-4.4031	-6.15015	-0.745807	-8.7783	-9.92275	-6.11482	-2.60674	1.00462	-3.43367	-4.1904	0.537504	-3.14559	-0.483305	1.39133	-3.88548	0.965167	-1.8882	-15.2727	-14.0189	-16.4627	-16.4398	-23.9146	-10.8716	-15.0446
ACC__TCGA-P6-A5OF	-23.8969	-5.43574	-2.3986	-5.17198	0.569754	7.49809	2.93946	-4.01555	-2.28674	-2.72955	-4.11983	-0.182698	1.03938	2.22948	6.14251	-2.27207	-1.2217	8.54724	1.78198	12.3418	6.55305	15.6113	-5.73414	-1.18536	-3.07102	-5.76605	-7.29672	-3.06513	-11.2354	-12.3501	-8.42638	-0.0215185	4.32976	-0.464749	-3.82475	3.27567	-1.17876	2.96345	5.26717	-0.321372	3.86205	1.9835	-12.6006	-12.3747	-12.3912	-13.3563	-21.0397	-8.76454	-13.1896
ACC__TCGA-P6-A5OG	1.76903	-10.1774	-8.29875	-6.61023	-5.4165	-3.76339	-4.24244	-5.2152	-5.20814	-4.93356	-11.4284	-6.93313	-7.34356	-6.66924	1.85358	-4.55683	-5.34996	-0.319627	-1.33643	0.26739	1.3884	0.25545	-8.27695	-5.88229	1.69503	2.13172	-22.6764	-5.45601	-10.2237	-11.8828	-4.20585	-7.32312	-5.45272	-4.25386	-6.18	0.557617	-5.26294	-4.52944	-5.12403	-5.26625	-3.69785	-5.31871	3.40705	4.20961	4.7576	-21.0143	4.57366	6.54615	-6.377
ACC__TCGA-PA-A5YG	-14.5845	1.33958	4.23343	-8.87126	-0.349139	4.56246	2.35696	-2.53902	-2.01244	-5.22844	-3.10598	4.2655	-8.54876	6.08232	-4.53631	4.0462	6.38703	5.615	-2.82787	-5.65473	-6.65817	-0.609029	-9.14485	-9.26547	-10.8092	-9.73459	4.2949	-9.55309	4.13993	2.7923	4.63947	6.48687	10.1532	-2.82993	-6.47177	7.39186	5.51707	6.8251	9.2351	5.33353	7.86175	9.03294	-17.0336	-3.64643	3.74937	-1.93508	4.07638	0.924229	-5.60766
ACC__TCGA-PK-A5H8	-20.5391	-7.61418	-3.15654	-4.72071	-0.039588	4.50827	0.827117	-2.52211	-0.158512	-2.46172	-4.69738	-3.31839	2.91666	0.525903	8.39121	-0.6429	1.26106	8.52434	1.8514	12.6332	8.45626	16.7692	-5.33611	2.15322	-0.507715	-3.08042	-34.1135	-2.59223	-29.7373	-28.1122	-9.33479	1.83817	8.19104	3.34573	0.67247	7.52895	1.43662	6.94932	9.91608	1.5074	7.28689	4.13104	-13.5237	-9.43431	-11.1446	-7.1841	-15.2922	-2.09519	-8.37876
ACC__TCGA-PK-A5H9	-13.7865	-1.45293	1.45634	-2.19726	-0.675674	4.7212	2.73886	-3.6343	-2.21303	-0.338008	-4.70869	1.52594	-7.96241	3.6936	-4.48677	-0.392203	4.10775	5.28431	-4.95535	-0.588902	-4.05556	8.06992	-4.97152	-11.0449	-12.1569	-10.9185	0.336603	-4.9809	-2.67498	-3.26124	-1.50644	4.43514	10.197	-1.67919	-6.75029	8.24815	3.55885	7.99964	11.2273	5.07724	6.75317	7.30174	-8.74052	-3.60594	3.50594	-4.94423	-7.06142	-1.96816	-3.1282
ACC__TCGA-PK-A5HA	-14.9268	-12.6679	-8.53332	-9.82738	-1.26051	3.75784	2.10698	-7.2377	-4.03607	-6.28391	-14.9575	1.02537	-6.11683	5.33215	-4.57491	-1.26722	0.234125	2.89746	-3.10264	-2.41623	-4.17984	1.70137	-8.78945	-2.03835	-10.5425	-9.70696	3.48724	-8.53476	0.28471	-15.969	-1.58212	1.99364	1.61158	-6.15333	-6.50068	1.75101	-0.533362	-0.28317	1.52192	-0.711258	0.433147	1.39112	-4.81959	-1.98963	3.45617	-0.164917	4.07013	2.56662	-3.29575
ACC__TCGA-PK-A5HB	-33.2963	-6.23575	-2.77592	-3.99343	4.73119	7.88924	3.96197	0.562696	2.92134	-0.945584	-5.60843	-2.42813	7.22965	-0.41983	12.6005	-3.49072	-2.82695	9.73963	3.10852	16.497	11.0703	13.5499	-2.76249	3.04606	3.83859	-1.06266	-9.519	1.89012	-11.5767	-12.2005	-9.17769	-2.56469	1.73224	2.21281	0.402566	2.60381	-3.29124	1.61072	3.20428	-0.506776	3.96581	0.903536	-16.9228	-14.4678	-19.4019	-18.7003	-29.8561	-12.6648	-15.3096
BLCA__TCGA-2F-A9KO	-8.79027	5.30674	7.63221	6.44354	-0.53332	-4.43306	-4.84367	5.48189	6.2565	6.97682	5.94308	8.36004	-1.01926	6.72996	-0.064442	0.548077	6.85852	-7.24496	1.10532	-6.09919	-6.54044	-7.82415	-1.36412	-6.66044	1.55488	1.37008	4.65847	-0.5554	5.80906	4.59931	5.61212	6.89239	0.512333	0.0428599	-1.70198	2.60879	0.475322	0.143867	0.153697	-5.29817	-5.27979	-5.87878	-1.67581	-1.49873	2.98008	4.55749	4.114	1.47371	-2.34017
BLCA__TCGA-2F-A9KP	-34.7819	-1.48803	0.418274	2.2392	9.93801	13.2466	9.1141	5.69244	7.07005	4.99228	0.55106	3.01263	6.98484	2.84989	11.5908	-2.86548	-1.19823	6.08178	1.82498	11.817	8.28195	7.91564	0.844944	4.87747	8.27281	2.17104	-10.3543	6.12431	-7.91124	-9.20363	-5.85267	-0.385148	2.73446	2.74802	1.54185	3.0775	-2.76478	2.27985	5.24727	0.159487	3.66061	-0.234115	-16.8357	-18.1652	-22.6939	-19.6914	-34.7494	-16.3013	-15.8373
BLCA__TCGA-2F-A9KQ	-27.178	-2.39051	-0.459669	-1.09843	5.73057	10.6277	6.17304	1.40933	2.60959	0.864722	0.958042	2.2594	4.42259	4.0112	8.42902	-4.78155	-2.39591	7.83241	1.113	11.1292	5.84221	11.6963	-1.49118	1.16068	2.19965	-2.51552	-10.0495	2.17637	-8.43694	-11.0312	-7.05996	-2.54935	0.354604	-1.13454	-1.26511	1.36972	-4.61213	-0.612548	1.36542	-1.26557	2.16006	-2.67592	-15.3798	-18.7241	-20.2738	-20.1953	-32.268	-15.3886	-16.9682
BLCA__TCGA-2F-A9KR	-35.5506	-1.64871	0.24747	0.970621	8.94463	14.1456	9.50277	4.1486	5.24385	3.91447	6.69304	3.9403	6.68587	5.03269	10.4753	-5.52739	-3.9482	9.32202	-1.97137	10.1668	4.82274	14.1865	0.499838	2.30939	5.92922	0.851919	-7.94406	5.1644	-5.86862	-8.00152	-3.39305	-5.46989	-1.8722	-3.12026	-2.76887	-0.4434	-5.4363	-2.41212	-0.275258	-4.85062	-2.05929	-5.50995	-18.7791	-19.8479	-22.929	-18.767	-30.014	-13.0357	-16.3366
BLCA__TCGA-2F-A9KT	-20.2808	-3.64782	-2.01478	-0.113661	4.65092	9.06676	5.64713	2.05969	3.22311	1.38919	-2.03191	1.82228	4.86473	1.5934	7.53153	-4.24777	-2.97894	6.68443	0.726011	9.35148	6.74002	10.3373	-0.508014	3.9573	5.54054	0.441349	-9.95644	3.54	-9.56989	-11.5267	-7.03525	-3.92863	-0.938493	0.173275	-0.829086	-0.536167	-5.23568	-1.59769	0.18328	-0.603646	0.670395	-1.88736	-13.045	-15.5838	-15.3561	-14.8941	-23.1097	-10.4862	-14.0171
BLCA__TCGA-2F-A9KW	2.86263	-1.67802	-0.429623	0.305068	2.10443	4.76819	3.54682	0.7503	-0.206478	1.19758	-1.1682	1.04861	0.0191366	0.759439	2.99712	-2.24775	-1.0784	10.2612	-2.04185	3.32234	10.0129	6.33043	-0.966283	3.5104	2.22858	-0.532914	-4.20761	0.0336278	-8.61118	-8.39684	-4.98852	-1.7074	-0.525184	0.416558	-0.335451	1.33737	-1.50314	-0.787495	1.16547	-2.04888	2.37925	-3.41214	-0.828997	-2.32323	-3.29344	-5.0925	-7.82312	-3.31488	-2.43656
BLCA__TCGA-4Z-AA7M	-29.0191	-2.86899	-2.32288	1.46431	7.48508	11.6416	8.10149	4.52579	7.55437	4.65507	-1.50856	0.941486	16.1685	1.3867	22.5263	-4.07339	-3.17546	7.10009	2.98321	15.932	17.7557	12.5892	0.629984	13.6079	14.7332	7.87845	-10.1268	5.62326	-10.0399	-9.8625	-6.11196	-4.11699	1.43866	3.5033	2.55139	1.59552	-5.57638	0.0263416	3.33776	-0.702739	3.25984	-1.447	-16.0727	-18.1044	-23.3416	-20.068	-32.7832	-14.1835	-13.7347
BLCA__TCGA-4Z-AA7N	-33.1739	6.28475	8.99917	7.89646	2.37554	3.66714	3.21733	2.05962	1.57827	2.5521	-4.4292	9.44386	-13.4175	0.683059	-14.6201	0.764893	2.78383	-10.8551	-1.75754	-2.62381	-9.21873	-10.5099	-0.00678749	-7.8097	-7.62591	-9.51733	6.07099	-1.82601	7.80197	6.59818	7.92746	8.01094	4.33041	0.677489	-0.39433	4.54395	2.33506	3.6116	4.05117	3.9603	3.56088	3.98206	-7.37783	-8.3737	-9.38296	-11.0012	-14.4804	-1.85112	-3.09032
BLCA__TCGA-4Z-AA7O	-16.9552	3.65912	3.10604	1.03931	1.98233	3.70667	2.82147	1.02204	1.94646	4.65531	5.11827	6.10408	-2.05897	3.80146	-0.593679	-0.500513	3.57757	3.36467	-0.168985	0.544949	-0.611021	-6.02804	-0.123689	-6.2392	7.83658	4.84879	-0.0454799	1.45933	5.2468	3.84968	4.90867	3.96942	-0.49613	-2.47837	-3.94975	2.3479	-0.970159	-1.25062	1.10291	0.638222	1.49365	0.0999264	-16.8746	-5.35024	-6.98851	-7.4416	-14.274	-4.12713	-5.80218
BLCA__TCGA-4Z-AA7Q	-8.3223	4.57505	6.32836	5.11968	-0.789267	-3.84074	-3.95623	5.2911	-4.76497	5.9208	5.31412	6.86511	-10.1452	3.1003	-8.91136	4.94467	7.19147	4.69988	0.0894966	-5.65037	-5.37935	-6.17226	-7.30367	-7.31728	-6.22288	-5.01179	4.60851	-5.41131	6.38177	4.99586	5.82059	2.67854	0.3825	-2.12613	-2.75012	3.08088	0.184799	0.943031	0.953211	0.0843662	-0.249442	-0.952135	-5.45935	-3.35547	-2.92871	-2.53681	4.28164	-0.21547	-4.45527
BLCA__TCGA-4Z-AA7R	-36.807	-3.5495	-2.17976	-0.106869	6.31106	11.1929	6.90381	2.36118	6.62576	3.14312	0.145239	1.93192	17.2489	1.87527	24.0177	-5.75011	-6.57457	7.46488	4.14385	17.663	20.05	13.0417	-0.148993	8.49669	9.88086	3.48891	-12.9954	5.82185	-13.9154	-13.4859	-8.16034	-6.6882	1.05174	2.23876	3.34584	-0.313907	-5.951	-0.50164	3.17788	-2.60402	2.26968	-3.04726	-17.0349	-20.1705	-23.602	-20.6235	-36.5414	-16.8519	-17.671
BLCA__TCGA-4Z-AA7S	-39.2433	-0.923125	0.969494	1.23619	9.93318	12.974	9.12817	6.19503	6.75501	4.30987	5.79252	4.38161	14.4919	6.90631	20.5685	0.471084	1.01328	2.09118	4.20501	13.238	8.8097	4.70744	0.941342	5.93172	7.99718	1.7302	-9.72964	5.93199	-5.87721	-7.35849	-3.75528	1.34264	5.15728	5.259	1.93044	4.52833	0.338199	4.7932	8.14266	2.16651	7.16683	1.24366	-17.6451	-20.4136	-40.5942	-20.7775	-36.0498	-17.2588	-17.7167
BLCA__TCGA-4Z-AA7W	-16.0476	-4.73799	6.09281	5.20673	1.97346	0.725447	0.68042	7.59861	0.911706	5.94448	-3.16519	-0.381616	-2.04594	-2.28449	0.21654	-1.26808	-0.737885	-9.57428	-2.09573	-1.97016	-0.514425	-9.1592	-3.51475	-1.0114	2.61654	2.97611	5.023	0.457401	5.9778	4.97235	-0.665247	-3.04452	-0.170627	-1.07358	-0.354369	4.50647	-1.47182	-0.199783	-0.15106	0.0159052	1.01132	-0.293613	-4.94554	-6.83624	-11.3168	-10.6484	3.07874	-1.61822	-2.02297
BLCA__TCGA-4Z-AA7Y	-20.8235	-4.12787	-1.50711	-2.98134	2.55404	5.53448	2.16857	-0.665535	1.87394	-0.901436	-2.15498	-0.328985	1.38492	1.07967	6.02164	-3.91605	-2.13903	5.61651	0.394585	9.8014	4.66302	10.5541	-1.90961	1.74067	3.10752	-1.57082	-10.6704	0.422446	-8.83949	-9.64701	-6.35947	-1.96292	0.338849	-0.299206	-1.15258	0.776373	-3.84192	-0.950642	2.12082	-1.35412	1.79852	-2.1259	-8.50225	-11.6248	-16.5491	-12.9673	-25.4291	-9.61034	-9.51169
BLCA__TCGA-4Z-AA80	-33.3013	1.78865	0.78345	2.90865	9.22537	11.6483	8.93963	4.58168	7.48866	5.92912	5.93507	7.84942	14.5505	5.20296	22.0033	-1.73587	-1.31328	1.1466	2.35537	12.4313	15.5365	2.51809	0.870465	13.0822	16.1026	8.89703	-7.50115	4.98956	-5.61145	-5.09619	-1.96979	-1.92573	2.41445	3.39293	2.09147	2.65146	-1.75061	2.49578	5.80143	-2.20067	5.28664	-2.92602	-14.5146	-14.5732	-20.1659	-15.0987	-29.8642	-10.591	-12.4992
BLCA__TCGA-4Z-AA81	-16.4284	3.72399	5.46432	5.56464	2.84122	3.0468	2.04432	8.90246	7.23487	6.19854	-5.14035	-2.95028	5.77337	4.61605	8.60151	-0.274763	2.48589	-10.2469	-5.67503	-5.67941	1.78512	-9.97707	-1.90959	-5.9709	11.7596	6.98908	-26.1406	-0.926783	4.98214	3.57819	3.92362	1.617	-0.166172	-4.95746	-4.30042	2.48345	-0.102437	-0.00424663	-0.164391	4.63395	2.96984	1.70428	-16.4299	-25.3061	-37.1443	-31.9149	-43.4265	-2.68858	-13.9043
BLCA__TCGA-4Z-AA82	-5.92813	-3.22918	-0.565245	-0.273761	0.0941233	2.68966	0.88264	-1.50763	-2.36186	0.198125	-2.08694	-0.199249	-1.6681	0.410576	-1.33005	1.45301	1.79074	6.40323	-0.479254	0.51295	-1.773	5.56487	-1.97068	-7.0611	0.770243	-1.65651	-7.82039	-0.550245	-7.09072	-8.4246	-5.83979	2.13265	-0.602279	-1.80032	-3.18048	1.60264	0.142955	-0.675263	-0.716784	0.0597403	0.720899	1.16177	-0.360339	-2.9572	-7.05572	0.0790297	5.00413	2.86391	-2.10176
BLCA__TCGA-4Z-AA83	-10.3554	-0.156217	3.15469	0.924594	3.94699	6.82862	4.82571	1.37271	0.130718	1.88906	-1.22914	3.71398	-7.87086	3.3822	-6.31249	-1.38634	1.25231	2.82906	-7.00137	-7.20235	-7.05698	-0.0479582	-2.7832	-9.6686	-3.2731	-7.1882	-2.68212	-2.38575	0.380263	-1.87726	-0.194019	1.43588	0.988819	-4.40022	-8.72213	3.50648	-1.52137	0.31609	0.924569	-0.247711	1.68352	-0.41874	-4.78709	-6.38456	-3.46852	-3.24952	-7.936	-2.73107	-4.15505
BLCA__TCGA-4Z-AA84	-25.3019	-4.06895	-0.882612	-1.86591	2.93132	4.08692	1.4037	2.23836	2.27167	0.756011	-1.62177	0.0580792	3.50004	0.846317	17.6003	-2.69466	-1.80303	6.66789	-0.0369155	11.3063	8.32036	7.52171	-2.70594	1.46693	7.33556	2.16354	-9.03298	0.747099	-9.28112	-9.15843	-6.98899	-1.88459	1.46935	1.57421	0.684623	2.35609	-4.07303	0.700187	3.46579	2.02617	6.34091	1.75716	-13.5594	-15.4004	-19.0098	-15.4117	-25.6491	-12.115	-13.0125
BLCA__TCGA-4Z-AA86	-3.42224	4.74119	6.62597	6.74403	2.02454	0.264529	0.362392	7.05375	2.59995	7.58426	-5.93564	-2.47082	-0.253575	-3.33494	2.10108	4.1064	-1.74877	-6.49496	-1.35767	-0.980989	0.80127	-5.18557	-1.0235	1.2582	2.82145	2.70962	4.67393	0.988358	6.09345	4.88645	5.01664	-3.90782	-0.372232	-0.447351	0.147509	-0.00889741	-5.9897	-5.5164	-5.89742	-0.78267	-0.534206	-5.69384	-6.06876	-11.8748	3.72783	5.04495	4.65969	7.64496	-5.86067
BLCA__TCGA-4Z-AA87	-19.6656	3.60905	2.01314	5.26426	8.66561	9.3098	7.02052	9.88052	9.01809	8.39109	5.34765	6.37242	12.4782	3.23119	19.0657	-0.200643	0.385098	-1.32521	7.13677	14.0103	14.9598	-5.45552	4.31219	13.8477	15.5086	9.99089	-0.705559	9.6526	-1.26203	-0.705656	-0.578991	0.121196	-0.157105	3.09605	8.40965	2.99065	-1.06791	0.840164	2.62525	0.00317506	5.15885	-0.945562	-12.1856	-10.7678	-34.175	-7.95852	-15.5121	-4.82064	-7.18735
BLCA__TCGA-4Z-AA89	-30.4809	-0.706807	1.01833	1.94812	7.13866	9.01212	5.79298	4.4185	5.12932	4.23375	0.71558	3.82043	2.2798	4.07764	5.51949	-3.44048	-1.00859	0.894761	-1.25981	4.34604	1.59758	2.68604	-0.520698	1.60959	5.68472	1.01497	-7.09315	1.99998	-3.60635	-4.97124	-1.12449	-1.47459	2.11421	-0.831631	-2.47882	3.25083	-2.59504	0.822461	3.63623	-0.548914	4.25502	-0.755671	-13.6874	-14.9382	-19.5784	-14.1285	-24.9673	-9.98411	-10.0197
BLCA__TCGA-5N-A9KI	-12.901	-2.90182	1.15764	-2.32193	0.972974	4.24089	2.58907	-1.11882	-4.22304	0.297847	-0.766118	1.52338	-5.76851	1.08628	-5.12504	1.47206	4.80403	7.2865	0.0837614	-0.573817	-2.72246	3.73225	-4.13192	-9.30971	-4.40399	-4.08797	-1.60337	-1.65767	-2.51073	-4.78908	-4.59078	3.33993	-0.528568	-3.01363	-5.41016	3.63117	0.51307	0.1014	-1.21331	1.31897	2.21702	-0.0669788	-5.97587	-3.61153	-3.41314	-2.54273	-5.1318	0.289608	-3.783
BLCA__TCGA-5N-A9KM	2.32814	-0.0182346	1.55048	-1.21088	1.74307	3.48632	2.4819	-1.09291	-1.71738	1.09124	-1.22766	2.19526	-6.80889	2.98142	-4.42725	-1.68356	1.92708	0.0757006	-5.09511	-5.28315	-5.54983	-1.24157	-4.25377	-8.48514	-2.34857	-5.87922	0.324314	-2.35552	4.34775	2.80248	0.623799	3.25073	2.5514	-5.73064	-4.01877	3.64662	-0.562704	-0.657937	1.48427	0.138635	2.51	0.977276	-4.98505	-6.15632	-3.24926	-4.27848	-8.77992	-1.57156	-3.5365
BLCA__TCGA-BL-A0C8	-6.90877	-2.61076	-1.524	-0.504932	4.83013	8.04325	5.17985	-0.417992	1.1825	0.830475	-1.72843	0.430121	3.62335	2.94487	6.93243	-3.32891	-1.82696	6.54063	-1.14367	8.1787	5.04405	10.3582	-1.48086	3.36423	2.56706	-1.4904	-6.1629	1.36555	-9.51573	-9.89631	-6.10002	-1.88493	0.187799	-0.943956	-1.18563	1.04262	-2.14697	-0.0302203	1.11078	-1.43853	1.04771	-1.79907	-9.84014	-9.48673	-10.1699	-17.6043	-26.7396	-12.8089	-12.0023
BLCA__TCGA-BL-A13I	3.62873	-8.94564	-7.09418	-9.12286	-0.801225	-4.85178	-1.78703	0.564016	-1.14121	-1.13493	-8.89302	-5.3757	-0.684524	-4.53852	2.23815	-2.7082	-7.67746	-2.16837	-2.02065	-0.651371	0.601668	-4.23245	-3.54169	2.36989	1.5124	1.18118	-21.6354	-0.690452	-12.2161	-13.2759	-6.60661	-5.74818	-0.0228482	-0.287492	-0.244778	0.204002	-1.88806	-0.164337	0.00226788	-5.21819	-0.428006	-0.140259	-5.67424	-11.485	5.56352	-23.1365	5.72501	8.5893	-6.57742
BLCA__TCGA-BL-A13J	-14.7014	-0.350872	1.3697	1.17599	4.21601	6.59977	4.1644	0.478179	2.38229	1.29673	5.65375	3.25447	2.64346	4.40019	5.24264	-4.20996	-1.5164	4.25052	1.06252	4.8922	3.24993	2.97079	-0.928822	-0.596263	0.0612603	-2.24114	-5.93486	0.324682	-3.90957	-5.79402	-3.8131	-2.00783	-2.01884	-4.35367	-2.19005	-0.018215	-4.28732	-3.45224	-2.57455	-3.17311	-1.79878	-4.72455	-7.96166	-11.3001	-12.4125	-12.999	-21.3679	-11.1561	-8.08005
BLCA__TCGA-BL-A3JM	-37.2725	1.34698	-0.918016	4.1289	8.98659	11.2354	8.98333	4.84507	7.70666	6.28647	6.69403	2.54389	18.5272	3.60954	26.2497	-2.7703	-4.57334	8.50229	9.86661	21.5482	19.851	7.75677	0.663762	14.8009	17.2722	10.0753	-5.62791	6.59719	-5.83448	-6.29752	-3.63143	-4.83983	1.04007	4.6969	2.74365	0.700462	-3.1683	2.3035	4.54819	-3.22517	1.1558	-3.76182	-18.1505	-13.4664	-21.3514	-15.3471	-23.8428	-7.67614	-15.2628
BLCA__TCGA-BL-A5ZZ	-20.1198	2.95106	5.10485	1.21028	2.15371	10.2587	7.188	-2.11069	-8.50342	2.58423	3.2663	8.81279	-2.69465	6.04533	-2.48605	-1.61238	-0.199915	4.81662	-2.60028	-3.81918	-5.01632	-8.25085	-2.27058	-7.36257	-8.42354	-6.61198	5.26884	0.895388	1.77273	-0.956637	-0.612343	2.64343	-11.4414	-6.73634	-9.34127	-0.362393	-4.174	-4.40099	-11.6533	-3.81336	-9.45894	-10.3517	-5.91549	6.55889	6.31471	-0.0171256	7.29548	2.74311	-4.4916
BLCA__TCGA-BT-A0S7	-21.93	0.328474	0.187953	2.85793	6.54062	10.2572	7.28309	3.11983	5.2464	4.89428	5.5537	3.45108	14.436	2.40465	23.0771	-1.50234	-0.690968	9.01085	2.75233	18.5659	17.71	8.85378	0.170477	4.94651	6.24317	1.26876	-6.77402	5.24938	-7.47294	-7.4423	-4.08651	-0.586278	1.21803	4.73706	1.19737	1.95875	-3.04813	-0.0583189	2.07958	-0.219943	3.88996	-1.12449	-9.72533	-11.4046	-13.2443	-12.6352	-21.066	-9.59054	-12.9082
BLCA__TCGA-BT-A0YX	3.45845	3.78815	5.9194	-0.664277	0.450996	-4.98662	2.28719	-1.48454	-2.54501	0.955638	5.22195	3.33457	-1.78066	6.36372	10.3131	5.13588	7.29914	10.4618	6.20194	7.78263	7.28461	-0.00983497	-3.88571	-8.82783	7.0942	4.30142	3.8094	-2.47787	5.12051	3.70911	4.8352	7.41452	6.16255	5.47553	-3.65354	7.45192	2.32563	2.31988	3.10388	1.367	1.49704	0.886943	4.27033	-1.97477	3.6442	-0.490336	4.60912	6.99898	-2.66107
BLCA__TCGA-BT-A20J	2.03457	-6.66325	-5.43902	-2.14675	-4.2974	-4.55781	-4.7695	1.83961	1.06365	0.451811	-6.41126	-3.62132	0.89542	-4.00589	3.4201	4.68279	6.07506	-6.4286	4.80427	0.184229	1.86889	-6.00523	-7.20244	0.922742	1.82239	1.32493	4.31075	-0.265714	4.34652	3.48597	4.15647	6.61352	0.45271	4.5863	4.23579	7.02216	5.42747	5.60127	0.533974	6.27355	1.75692	1.60631	3.89298	4.62587	3.63166	6.08387	5.29212	9.45608	6.91194
BLCA__TCGA-BT-A20N	-24.3835	-2.5438	-1.64566	0.415261	6.03048	9.31951	5.54309	3.61886	6.02312	2.4183	5.52273	1.45968	16.6946	2.75608	25.6257	-5.16792	-3.82851	7.1208	2.40436	13.1983	18.0717	10.29	-0.222401	6.44906	9.34724	2.68822	-10.3516	5.04592	-9.9059	-10.7751	-7.16343	-4.53425	0.136278	2.59037	0.889264	0.347273	-5.73285	-1.50209	1.96762	-1.51444	2.75718	-2.02042	-15.0028	-15.8527	-20.9319	-18.6367	-29.8696	-13.5097	-14.5118
BLCA__TCGA-BT-A20O	-10.22	-9.22049	-6.58896	-2.81161	0.395864	-0.561837	-0.775074	2.42454	1.6983	0.437384	-12.1449	-5.57716	-3.26853	-5.28242	0.0258894	-3.00129	-1.63366	-5.94368	-3.37666	-1.86254	-0.259647	-2.94644	-3.07229	1.44047	1.55395	0.450129	-22.9896	-2.14354	-10.1611	-9.13233	-1.21884	-4.17221	2.0664	-0.560633	0.331202	3.0315	-0.863598	1.4641	1.99856	1.74043	2.54395	2.56426	-11.3302	-16.6183	-18.5941	-30.0633	-33.0509	-2.92546	-8.43089
BLCA__TCGA-BT-A20P	-35.449	-3.72735	-1.02663	-1.4727	8.26756	12.2689	7.7632	3.83164	4.0123	3.67186	6.19155	2.37378	7.65522	3.06841	10.9653	-5.99507	-4.64229	5.48111	-0.0481462	13.7653	8.09679	9.32722	-1.9647	4.10765	7.35291	2.04835	-11.1263	4.45423	-10.0957	-12.0612	-7.13732	-5.50124	-1.20315	-0.427362	-0.359565	-0.520586	-6.63435	-1.95462	0.718512	-3.85615	0.557344	-4.68402	-17.4281	-18.7409	-21.8566	-17.4109	-28.5491	-13.8964	-15.1292
BLCA__TCGA-BT-A20Q	-8.8389	4.81735	6.36858	0.859886	1.35342	3.95877	6.85662	-1.36449	-1.10986	1.51207	5.25157	8.05379	-3.97035	7.31411	-9.54473	4.04828	6.23698	-7.94288	-0.0594665	-7.59295	-9.17919	-6.13811	-1.00314	-8.6016	-8.18172	-7.28222	4.4093	-0.468076	5.43943	4.03668	4.92471	7.17173	0.487146	-6.10982	-4.00532	5.90955	4.90319	0.699763	1.08136	0.840279	-3.14714	-0.684205	-4.99051	-3.25941	-2.47966	-2.91097	3.95692	-0.309741	-4.10641
BLCA__TCGA-BT-A20R	5.23512	-3.28812	-0.140465	-2.78834	-0.14523	6.58857	3.87312	-2.79433	-1.96215	-0.539231	-0.88035	2.68457	-2.35434	1.682	-0.893768	-2.62643	-1.97328	6.34887	0.593855	2.18208	1.13931	4.7235	-2.11086	-6.53637	-6.89847	-3.86489	-4.02077	1.08884	-6.03388	-7.96911	-6.70205	-2.15658	-4.28077	-3.45232	-5.46754	0.174249	-2.90854	-3.39485	-4.67572	-2.8722	-3.14699	-3.35981	-1.73109	-0.564009	-2.82781	-3.09676	-5.92825	-0.155768	-1.42069
BLCA__TCGA-BT-A20T	-13.004	4.58662	7.32144	1.86702	3.288	7.38611	4.97555	0.209312	-0.435396	3.0776	6.09924	8.70219	-2.43116	4.85826	-2.13764	-2.42712	-0.0702937	4.9732	-1.45527	-1.46209	-3.40508	-6.01479	-1.34383	-8.92888	-2.56141	-3.62474	0.440969	0.681837	1.91968	0.513936	-0.856221	-0.306996	-4.35577	-5.97688	-7.01501	0.762816	-3.08987	-3.43398	-4.19299	-2.85486	-2.08038	-4.4167	-5.81224	-6.05861	-7.27605	-4.84332	-10.0492	-4.09129	-4.76471
BLCA__TCGA-BT-A20U	-11.3199	-0.537635	2.51092	0.575279	2.89962	6.38711	4.25382	0.833152	0.468792	2.62048	6.85696	3.61832	10.6167	7.86631	17.4805	-1.09332	0.185516	7.9387	1.3103	7.13316	3.19385	6.21066	-1.90004	-0.271269	2.2829	-0.494081	-3.25747	0.418686	-2.80192	-4.51338	-1.14588	-1.51489	-1.10245	1.70144	-3.35613	2.31693	-1.75975	-0.851888	-0.594747	0.164333	0.85657	-1.88145	-3.08501	-6.46853	-8.93109	-9.21533	-14.0643	-3.18116	-6.23035
BLCA__TCGA-BT-A20V	-17.6766	-1.21788	1.79579	0.470529	1.81407	3.70187	2.44815	0.318853	-0.0371661	1.37075	5.6235	2.33822	7.94934	3.60118	13.1638	0.0476553	0.756199	3.58308	0.740945	1.60941	7.81423	0.204242	-1.46713	1.73304	12.7788	8.17817	-4.63827	1.86185	-2.16117	-3.98908	-1.69194	0.838239	-1.67069	-0.0765546	-0.937122	2.40425	-1.25824	-0.891882	0.476616	0.347239	2.38126	-1.03321	-7.02012	-8.15647	-14.8739	-4.26686	-10.3312	0.0828528	-2.17148
BLCA__TCGA-BT-A20W	-38.5134	5.06705	7.00688	7.46056	12.5895	14.3258	11.7833	10.324	10.8105	10.0155	6.10555	9.12593	-0.249544	4.52491	12.8453	-1.26491	1.56249	-0.596708	-2.3941	0.409693	7.20457	-9.01147	5.56186	1.09607	2.8692	-1.24109	-3.65488	10.951	5.10559	3.18227	0.979348	3.39	-0.889973	-3.07531	-1.75636	0.945438	-0.8923	-1.36894	0.489298	-1.85849	0.587967	-2.76852	-9.51574	-9.44702	-15.5276	-11.4178	-21.1837	-10.1462	-8.16893
BLCA__TCGA-BT-A20X	-8.63487	-0.500205	1.57449	0.510347	-0.349221	4.00699	1.97853	-2.44562	-0.419715	1.70338	0.469543	2.38618	-1.20053	2.13484	1.647	-1.30789	2.59117	5.1122	-0.40809	2.48213	0.15403	-1.23504	-3.11884	-8.30925	0.957443	-0.605175	-4.55091	-2.42546	-2.32701	-1.92844	-2.30338	2.08021	0.808984	-2.17055	-4.03451	2.94123	-1.16936	-0.484605	0.758987	0.378188	2.62709	-0.616389	-4.20745	-6.98097	-6.19771	-6.42621	-11.3043	-2.27811	-6.58798
BLCA__TCGA-BT-A2LA	-65.0284	1.3312	-0.143279	5.23635	13.7579	23.6402	17.1741	8.01066	11.5466	9.80445	8.71774	9.38202	14.9929	7.19785	31.7377	-5.1017	-5.90502	12.7792	7.69417	22.8372	14.9119	12.6456	3.21109	7.5822	9.92913	2.85085	-9.82051	12.9451	-9.75538	-12.0266	-6.09288	-5.61066	-1.49293	1.33679	1.51602	-1.08837	-6.52064	-1.07952	2.76395	-7.34292	-1.16388	-8.92913	-24.9741	-22.5651	-29.5976	-21.1667	-33.4431	-16.2064	-21.2449
BLCA__TCGA-BT-A2LB	-7.88719	0.729486	6.86672	2.45807	4.09662	7.19808	6.09732	1.71903	0.030693	3.63465	1.16593	4.63391	-3.73792	2.69608	-3.79905	-0.906249	2.36216	3.83812	-1.89905	-7.66169	-7.04201	-6.65688	-1.2215	-7.87444	-6.03085	-2.08282	1.52201	0.403536	5.98329	3.59699	1.1767	4.14338	-1.65881	-4.81584	-5.58543	1.33297	-1.64125	-2.02592	-1.82936	-1.81143	-2.22486	-2.97876	-2.49019	-1.56284	3.431	-0.109971	4.55382	-0.207859	-1.47967
BLCA__TCGA-BT-A2LD	-15.0859	-1.35329	-0.191277	1.0391	5.24623	6.57953	4.11351	2.79027	1.45891	2.22092	5.58205	2.58493	0.627883	3.12648	2.30165	-3.15969	-1.11757	4.84444	-3.73728	1.70138	-0.0339533	1.71455	-0.401136	2.92967	4.46808	-0.185999	-4.74228	2.02615	-4.66224	-5.36182	-3.79491	-0.961567	-3.22863	-3.06943	-3.45107	-0.121066	-4.27495	-3.37658	-2.93591	-0.0358908	0.500441	-0.982288	-5.44344	-7.15126	-9.7051	-9.26324	-14.936	-7.55604	-5.47969
BLCA__TCGA-BT-A3PH	-20.5425	-2.2102	-0.0935691	-0.302928	6.98592	10.1774	6.53273	3.93401	4.0032	2.18246	0.682889	1.93332	4.68384	2.69075	8.6449	-3.82689	-1.60727	5.9301	1.34861	9.93181	7.97145	6.68645	-1.43722	2.89001	5.19938	-0.0335749	-9.42504	2.56492	-7.57667	-9.43196	-6.67016	-3.0827	0.750903	2.38958	0.60557	3.1097	-4.46503	0.201195	2.16129	0.912423	4.05279	-0.432975	-11.5802	-14.2298	-16.55	-15.9752	-26.2184	-10.8818	-13.8595
BLCA__TCGA-BT-A3PJ	2.83804	0.766622	1.55396	0.513167	-0.365868	-3.70989	-4.20971	5.75812	5.3861	1.42876	-6.89718	-7.0196	6.26307	2.51734	9.20696	3.55505	5.52137	7.46847	4.31777	4.64547	5.44407	3.20006	-1.53218	7.93153	9.90505	7.13177	-25.072	0.330288	3.78925	2.8255	-0.000596824	1.77554	0.80252	-2.10383	3.75607	4.77881	0.0826076	-0.135957	0.306192	0.529922	0.338936	-3.8344	-3.14798	-1.8277	2.95389	3.82248	4.06421	6.55078	-3.59217
BLCA__TCGA-BT-A3PK	3.08869	0.373642	3.14221	0.302005	-1.55371	2.2777	1.14814	-3.21632	-2.38987	0.635002	5.2494	3.5563	-2.45907	3.64909	-2.29822	5.98988	3.71551	9.40136	0.719542	2.7416	-1.33963	-3.85066	-3.17629	-9.10142	-8.41852	-7.70635	-1.12233	-2.36275	1.13754	-0.540017	-2.04522	3.43278	-0.13658	-2.09552	-5.73408	3.62305	-0.107117	-0.165297	-0.691756	0.595936	-1.13439	-0.159411	-3.30526	-3.24805	4.44883	-2.7814	5.54106	1.01957	-4.30541
BLCA__TCGA-BT-A42C	-29.1737	-2.52626	-0.667789	-1.58572	6.76253	9.86442	5.63456	2.47801	2.94471	2.46833	0.960106	2.51026	3.69866	3.80415	8.48416	-2.03745	0.00496935	5.3502	2.44899	11.8289	6.92252	9.19414	-1.35737	0.840739	4.22783	-0.394518	-9.61871	2.97429	-8.93748	-9.56615	-4.83737	-0.499017	2.9268	3.50378	1.42971	3.24661	-2.29858	2.14739	4.95349	-1.00829	5.59499	-1.24412	-12.7771	-14.315	-17.342	-16.6338	-29.4144	-13.6982	-12.1582
BLCA__TCGA-BT-A42E	2.43844	-7.07975	5.47709	-6.92691	-4.86965	-4.42569	-4.94289	2.36083	-5.31185	0.279086	-6.47762	-4.22481	0.146497	-6.41435	3.03411	0.623167	2.78885	-7.77063	-0.576784	-6.23149	1.10454	-7.3794	-9.22795	-0.0672587	3.19733	2.43955	-20.4275	-6.23238	-8.81935	3.54765	-9.06769	3.05822	-4.61016	-5.86911	-4.02352	1.77976	-0.240471	-4.91325	-5.23528	-4.45208	-4.09514	-5.5424	-6.38461	3.86295	3.28316	4.88257	4.47237	7.5022	4.8185
BLCA__TCGA-BT-A42F	2.98663	-7.0755	5.54328	-2.17462	-0.537947	-4.2226	-4.71386	5.53545	-5.3948	5.6986	-6.55201	-2.45039	-1.35154	-3.15755	1.74811	5.30596	6.98303	-9.24463	5.07802	-0.88843	0.993156	-8.54199	-9.14962	-6.99017	1.72147	1.03699	-18.1666	-6.28493	5.61167	4.35468	-3.93858	-2.0473	5.63765	0.597199	4.08286	7.85691	5.65141	5.74936	1.21418	6.21886	7.04097	2.06046	4.07673	4.18053	4.04173	5.59782	4.98503	8.26857	5.6932
BLCA__TCGA-C4-A0EZ	-63.143	-0.337103	-0.720032	4.57505	13.2129	20.1548	14.7635	8.36483	10.9794	8.69232	8.83887	5.11506	24.3394	5.66071	31.8551	-2.56662	-3.74316	12.3115	15.6591	24.9582	25.6519	10.4405	2.42982	7.03885	11.1364	3.65542	-10.602	12.651	-10.8625	-12.1477	-8.18412	-4.75252	2.02235	6.47008	3.19095	1.73178	-4.33845	2.19447	4.96603	-2.96392	1.40643	-4.44443	-22.9897	-21.3933	-31.5879	-20.616	-33.7394	-13.8464	-19.8484
BLCA__TCGA-C4-A0F0	-6.00936	-11.7527	0.852227	0.584971	2.07425	3.05068	1.85207	7.14269	1.6376	2.37847	-6.74739	-9.03447	8.42058	-7.52014	17.8496	-3.04563	-8.61795	4.1784	4.41615	11.0339	12.9834	1.69508	-7.23482	12.7284	15.542	9.81689	-32.142	5.56011	-17.95	-21.1964	-12.6869	-11.3056	-2.38174	0.849631	6.44644	-3.51815	-8.81691	-6.44276	-6.89067	-4.81224	1.73815	-5.493	3.33111	-2.78535	-14.1172	-30.121	-27.1487	5.12138	-3.50748
BLCA__TCGA-C4-A0F1	-8.35185	-0.799017	1.14304	0.57794	0.976325	3.26375	1.96301	-0.849552	-0.0617716	2.10315	5.42697	2.00786	-0.639428	2.81181	2.78086	0.154392	2.19306	7.49671	2.33541	6.78541	2.37764	6.41999	-3.22568	-8.51338	0.122727	-1.39772	-5.88393	-2.58934	-5.77588	-4.87486	-2.99958	2.20571	1.29375	-0.362187	-2.28289	3.17405	0.272734	0.902945	1.45688	-0.456767	2.07347	-0.181286	-4.75745	-5.97594	-5.52674	-6.99199	-13.1569	-1.7598	-5.18224
BLCA__TCGA-C4-A0F6	-17.8204	1.14036	2.5277	2.16168	5.97278	12.0225	6.87936	3.58655	3.98693	6.91683	5.81018	4.98369	3.86217	4.47943	17.3736	0.0426539	2.45323	3.02009	0.70823	6.8271	4.57528	0.302698	0.469363	10.5804	6.04311	6.8763	-4.12133	4.04134	-2.62266	-3.72285	-0.422025	1.70421	0.634313	3.36994	-0.757015	3.19794	0.27339	0.862755	1.45164	1.29669	3.1506	0.667179	-8.43146	-10.6075	-13.4037	-12.6214	-20.8197	-9.24627	-7.70114
BLCA__TCGA-C4-A0F7	-28.8947	-3.18803	-1.1132	0.0895577	5.46501	8.5383	4.86164	2.41085	4.43979	2.55152	-0.685714	0.728525	15.1252	1.51837	23.434	-3.89212	-3.52424	11.7498	3.43853	16.9327	19.4132	13.1926	-0.163216	4.93952	7.6657	2.81371	-10.4418	4.74767	-10.6775	-11.898	-7.23086	-4.15064	-1.15055	3.4285	-0.200539	-1.95521	-5.58311	-1.64992	1.49969	-2.77842	-0.085419	-3.34533	-12.9355	-14.6851	-18.9618	-16.1302	-26.9396	-12.2446	-14.9483
BLCA__TCGA-CF-A1HR	-21.8193	1.09532	3.30112	3.26533	7.56087	9.36179	7.05204	4.07966	2.73388	4.1342	5.44305	5.34803	-1.38755	4.71774	-0.0124995	0.276863	3.90486	3.16329	-0.695109	1.20291	-1.18069	-2.20447	-0.468153	-8.97059	-0.040751	-3.45187	-3.47527	2.26064	2.31467	-0.3965	0.547735	3.57405	0.64521	-2.30206	-3.69356	3.55808	0.414747	0.5484	2.59531	2.09647	3.40978	0.813606	-8.83116	-12.0766	-13.638	-10.5118	-18.6716	-7.83177	-8.85529
BLCA__TCGA-CF-A1HS	-5.75309	0.416754	2.43474	2.06394	2.10357	5.84613	4.19078	0.0106565	-0.521507	2.89508	5.99127	4.06589	7.8458	4.5031	10.4851	4.70385	2.22298	2.14998	6.14727	6.05256	7.86357	-7.43973	-0.992318	1.08883	7.90339	4.64811	-2.4575	0.996785	-2.29157	-3.18763	-2.70236	2.05765	-5.80907	4.53167	-3.46197	0.422902	0.236758	-0.910749	-6.17099	-1.23876	-5.53721	-6.07219	-1.77675	-1.36097	-1.91679	-2.426	4.41117	-0.070622	-3.10043
BLCA__TCGA-CF-A27C	-37.3305	-0.651555	1.22103	1.344	9.10302	10.2588	7.36494	6.24545	7.52737	4.41588	1.04815	2.77414	3.14129	4.20165	7.32354	-5.857	-0.746653	1.58289	-2.12924	6.45766	3.37903	5.32774	-0.441599	1.45864	7.03014	1.2034	-8.05032	3.42338	-2.04837	-4.41388	-0.292631	-1.75479	4.16488	-2.46017	-2.60565	3.41258	-3.63205	2.09199	5.48965	1.05222	4.11034	1.01695	-19.1225	-20.7394	-43.7133	-21.3556	-35.3064	-15.4748	-16.8395
BLCA__TCGA-CF-A3MF	-38.5359	-1.51686	0.934266	2.76793	9.04099	13.2861	9.85744	5.71737	6.03831	5.39172	1.25417	3.95222	5.57817	4.84823	6.76515	-0.833913	3.17345	4.65243	1.91031	8.90747	5.74684	5.96545	-0.277451	0.973352	4.88191	-0.946917	-7.03592	2.40748	-1.64194	-5.00109	-1.238	1.77574	5.28907	1.63598	-0.541266	6.41029	0.475647	5.16582	7.035	2.50711	4.1396	1.73751	-16.1909	-17.0193	-20.8576	-17.2385	-27.8694	-12.5297	-14.4128
BLCA__TCGA-CF-A3MG	-29.5431	-3.56442	-1.5117	-1.74034	4.9208	7.29044	3.90075	2.02252	3.05752	0.708822	0.334445	1.37781	3.69523	2.94634	7.44185	-2.96352	-1.23192	4.22662	2.1828	11.7447	7.62029	8.94147	-1.31375	2.08821	4.65065	-1.08385	-10.6985	3.34762	-9.06664	-10.2707	-5.6377	-1.93881	1.1483	1.17108	-0.735542	1.15221	-3.13659	0.127006	3.19907	-0.560378	3.61789	-1.83904	-14.3006	-16.6523	-20.2385	-19.023	-31.3202	-14.2985	-14.6135
BLCA__TCGA-CF-A3MH	-32.3243	-2.17467	0.460673	-0.21892	7.13409	9.97015	6.17991	4.10269	2.89745	2.52148	1.29718	2.99195	3.3268	4.33714	5.97046	-1.96276	0.292833	3.79964	0.75468	8.56203	4.06272	9.53277	-0.83261	0.600325	3.15107	-1.20878	-8.85693	3.20261	-5.54162	-7.75558	-3.20941	-0.337824	0.85222	-1.04671	-3.00853	1.27002	-1.98991	0.161024	2.63843	0.109482	3.49801	-1.31541	-14.3855	-16.335	-20.9115	-15.7252	-25.8943	-11.6804	-13.3892
BLCA__TCGA-CF-A3MI	-25.4202	-2.6395	2.70902	0.467061	6.84026	9.48338	5.49819	3.93365	0.37748	3.53208	-0.255336	2.96524	-1.42285	2.77215	0.640108	-2.64775	0.162363	0.632162	-2.61991	1.91266	0.174122	-2.35966	-2.00207	-6.96389	1.94187	-1.83507	-4.72983	1.82528	-1.22484	-4.12599	-1.54695	0.154738	-0.996153	-3.25395	-3.80517	2.27146	-3.13351	-1.48473	-0.817055	-0.0977725	2.96763	-0.72553	-9.48324	-9.66297	-11.3909	-10.2391	-17.053	-8.52502	-7.1218
BLCA__TCGA-CF-A47S	-23.0817	0.367831	3.11059	-0.0109601	7.4803	11.1615	7.41989	4.62952	1.28041	3.94773	-2.70198	4.79619	-8.27183	3.74425	-4.38713	-3.12318	1.96669	-0.0991885	-7.74369	-4.49329	-5.52254	0.912946	-4.03621	-10.3689	-0.919701	-3.89334	-3.94901	-2.20245	1.16631	-2.01587	0.324902	0.445258	4.4049	-7.05108	-7.01184	6.08414	-1.9048	1.56834	4.43968	1.35502	5.26341	1.70672	-12.9141	-14.547	-13.8199	-12.0708	-19.404	-10.3509	-8.36669
BLCA__TCGA-CF-A47T	-45.4183	-3.22176	-0.179304	0.658939	10.7822	15.8831	10.1225	6.41596	6.28481	5.9962	0.010458	2.55408	9.09137	3.13702	13.6586	-5.44181	-4.3287	6.86196	3.64074	18.0658	11.4304	10.2645	-1.5766	5.64952	11.8733	4.36135	-10.5731	8.25642	-8.23779	-10.4863	-6.11822	-5.6948	-0.0501668	0.82493	0.304537	1.81227	-6.11352	-1.05494	1.72027	-2.13884	2.81581	-3.38795	-21.2077	-22.8776	-27.3578	-23.3512	-37.1446	-17.4695	-19.9501
BLCA__TCGA-CF-A47V	-30.8296	0.336672	3.15512	2.22735	7.26898	9.67821	7.36865	3.77489	3.24554	4.12083	-0.0357115	4.10768	-5.57188	3.87998	-5.22368	-0.670777	2.25571	1.77939	-3.96674	-1.33151	-4.99433	2.56155	-0.684856	-9.93875	0.990536	-2.28289	-4.72587	-0.658788	6.09424	3.55499	4.89278	2.28473	2.10123	-3.25738	-6.62691	3.66144	0.410354	2.39392	3.51	-0.0750683	1.38538	0.154453	-8.68444	-9.54635	-12.0526	-8.39128	-16.5927	-7.33079	-5.93983
BLCA__TCGA-CF-A47W	-41.0532	-4.08993	-0.120973	-0.610711	10.84	15.2342	9.61605	7.6055	4.28412	5.43956	-1.73436	2.04878	4.04713	2.49528	9.62131	-6.21178	-3.27884	5.50335	-1.29518	12.4637	7.18098	11.783	-3.42463	3.93401	9.44259	2.72102	-9.26183	5.14696	-6.27772	-9.05865	-5.38117	-4.87862	1.8784	-2.45283	-1.93276	4.07713	-5.52118	0.630239	3.92535	-1.20116	4.2861	-1.76879	-23.1606	-22.6736	-26.0151	-23.3483	-34.9271	-18.1305	-19.0166
BLCA__TCGA-CF-A47X	-40.2729	0.454619	3.37246	1.39353	8.9223	14.2395	10.3676	3.8032	6.99338	4.88459	-1.1771	5.34326	0.225731	5.09906	5.45571	-0.483496	2.92035	-0.348491	0.198913	6.08069	1.77756	2.42403	-2.10059	-0.146462	2.84511	-2.14574	-8.60581	1.50701	-4.25654	-5.78498	-0.712298	3.60315	7.60795	0.569628	-2.84636	7.46502	1.4707	6.21954	9.84466	4.02735	6.66921	5.32476	-18.7116	-20.0814	-23.3179	-18.4176	-31.7435	-14.2729	-15.6471
BLCA__TCGA-CF-A47Y	-37.4479	-1.07416	0.704148	-0.0432462	8.53485	13.2924	8.82971	4.83585	4.29578	4.0962	-0.285326	3.59859	-0.354935	4.54531	3.97678	-6.58841	-1.68582	2.93409	-5.3421	4.92572	0.886685	9.52534	-3.14849	-1.1278	3.19947	-1.10483	-8.8094	0.792821	-3.62555	-6.32256	-1.92678	-2.02261	4.37542	-4.85745	-5.64581	4.07301	-3.22859	2.35022	5.06537	0.733818	3.27692	2.13025	-20.5189	-20.6501	-23.8687	-20.6516	-33.2057	-15.1834	-16.0863
BLCA__TCGA-CF-A5U8	-34.6568	-1.7599	0.938762	0.181929	9.60532	14.0644	9.45873	5.78305	5.33103	4.91559	0.0874047	3.79261	0.685848	4.72061	6.05919	-4.68686	0.0166719	2.62835	-3.63381	6.20168	2.94216	8.24958	-3.73116	-0.908713	3.96141	-0.638099	-9.77686	0.942933	-4.22222	-6.99769	-2.72496	-0.690822	5.25221	-2.63837	-4.1741	5.74317	-2.58961	3.21034	6.55768	2.42213	5.88474	3.36661	-20.3674	-21.0162	-23.9748	-21.0748	-34.7003	-15.6821	-16.3102
BLCA__TCGA-CF-A5UA	-33.0702	-2.61279	0.257563	-1.48926	7.4893	11.389	6.39853	5.27145	1.82506	5.00028	5.31312	2.66402	5.65927	2.46115	9.62307	-4.94507	-3.01821	5.37483	0.419347	12.5519	7.99085	8.74559	-2.84448	3.20009	8.0065	2.49708	-6.46142	6.37834	-5.49274	-7.65664	-5.30329	-4.68856	-1.85664	-2.48485	-1.05999	2.45337	-5.6607	-1.75922	-0.335141	-1.74964	4.30544	-3.97873	-17.9086	-17.0323	-22.2351	-16.7471	-25.9716	-12.619	-15.3621
BLCA__TCGA-CF-A7I0	-32.7148	1.64662	4.36154	2.01698	8.83642	13.4657	9.69405	3.89119	2.96286	4.99398	5.8751	7.11885	-0.062475	7.87859	2.72301	-3.54785	-0.903302	3.59194	-0.822794	4.87433	1.02943	-2.37292	-0.46226	-0.491378	0.844266	-2.34105	-4.63987	3.99331	2.61967	-1.73029	0.625552	-0.488689	-1.65375	-4.56087	-5.46852	0.331263	-2.97349	-1.15508	-0.294499	-1.98837	-0.535555	-3.28205	-12.892	-15.6672	-16.1957	-16.4847	-26.6261	-12.6428	-14.0095
BLCA__TCGA-CF-A8HX	-36.2746	-1.80464	0.802417	2.02568	9.29633	13.6474	9.47803	5.60568	5.58446	4.7094	1.73686	3.25897	5.09905	4.29393	6.72604	-1.88432	0.908597	5.45585	1.3231	9.22243	5.54518	8.41221	-0.648664	-0.221987	4.44279	-0.428467	-8.68408	3.47175	-5.66158	-8.60224	-4.41355	-0.27404	4.45777	1.43594	-0.329568	4.87481	-1.69564	4.36381	6.99501	2.35412	4.91066	1.31138	-16.4092	-16.8855	-22.2395	-17.1448	-26.1252	-12.4705	-14.9461
BLCA__TCGA-CF-A8HY	-35.0295	-2.97915	1.44975	-1.10249	8.68677	13.6096	8.09674	5.85764	2.10348	5.25188	1.17162	3.65402	2.90381	2.77409	8.32073	-4.70129	-3.04467	4.62347	-0.078926	11.6821	7.27255	7.4373	-2.9723	2.92631	7.27913	2.45571	-9.07018	5.86015	-6.69628	-9.67456	-6.01811	-4.40592	-2.60317	-3.19635	-1.6975	1.27513	-6.35163	-2.76308	-1.02478	-2.93881	2.44993	-4.3191	-17.479	-18.9833	-22.2681	-16.5243	-26.6875	-12.8736	-15.1602
BLCA__TCGA-CF-A9FF	-26.8659	4.13623	6.28918	2.34307	5.08451	7.47602	5.61978	2.16672	2.19377	3.60554	5.21388	5.4778	-2.5348	6.42364	-2.31706	4.48125	7.19936	2.20251	4.2323	5.69244	1.3309	-8.37272	-0.755343	-7.21213	0.730823	-1.76195	-4.41474	1.56552	4.93687	3.2833	0.84757	8.37477	5.54434	4.50601	3.92319	6.31124	5.0433	5.16842	6.8395	4.90058	7.91446	4.48087	-7.40574	-9.9379	-13.6989	-8.61917	-20.693	-7.09587	-6.69202
BLCA__TCGA-CF-A9FH	-31.4668	-3.0522	-1.3945	-0.44459	6.52456	8.04126	4.77287	4.02513	4.71624	2.29548	-1.36567	-0.0882691	1.28006	1.86551	4.79303	-5.14622	-2.78761	3.80606	-1.49262	9.18268	3.41042	11.6142	-2.20788	1.01937	4.99076	0.0130383	-9.98653	0.993283	-8.17567	-8.91083	-3.65539	-3.27557	2.64584	-0.852216	-2.31312	2.13393	-2.75031	1.45864	4.24053	-0.777006	4.10255	-1.04606	-17.3405	-16.3437	-19.7252	-18.1973	-30.4565	-13.0419	-14.4826
BLCA__TCGA-CF-A9FL	-18.8578	0.0551666	1.60572	0.203725	4.1228	8.06093	4.91246	1.10263	2.34895	1.48146	0.849755	3.89998	3.21266	3.99447	6.44243	-3.30182	-0.220666	6.23449	2.07295	10.7968	5.08903	6.40972	-0.196091	3.44568	3.83603	0.614906	-5.25581	2.41764	-5.34984	-6.39668	-2.88638	0.779218	1.59401	0.293847	-2.1522	2.27534	-1.81691	0.341043	2.7076	0.20323	3.87668	-0.328816	-8.93904	-10.955	-14.9215	-14.4419	-23.6272	-10.7481	-8.77099
BLCA__TCGA-CF-A9FM	-17.4449	4.64518	4.15559	1.31613	3.41812	10.764	8.6514	0.78932	1.65746	2.37155	-1.83592	7.564	-8.5353	7.19188	-5.89236	-3.88301	1.71741	0.864707	-9.5656	-9.73449	-9.68633	1.83977	-2.39425	-9.908	-4.676	-6.50377	-4.40653	-2.75038	0.50139	-2.16622	1.51836	0.912879	5.82725	-8.10271	-10.3887	5.95599	-1.50319	2.78305	5.36313	2.15722	3.9258	3.88431	-20.7237	-11.268	-10.6096	-7.13615	-13.528	-5.70755	-4.30407
BLCA__TCGA-CU-A0YN	-7.52213	4.88649	6.5541	6.8436	-0.189948	4.6036	3.08462	5.94866	7.71683	6.91906	5.83744	3.55652	7.60327	3.55599	9.88173	5.03013	7.46535	4.40227	5.55978	6.88695	6.77249	-5.12197	-2.36217	1.44494	8.1606	5.20368	-22.0589	5.65243	4.8197	3.62455	-0.839897	7.26011	2.44184	4.23544	4.51505	7.88134	0.703784	1.4111	2.48297	2.31416	0.994122	1.33084	-3.63118	-3.44102	-0.934372	4.62646	4.46059	7.81925	-4.59179
BLCA__TCGA-CU-A0YO	-13.3943	5.10085	7.73962	1.25493	1.09079	6.26744	4.78678	-1.9199	-1.18725	2.20772	2.34028	5.79779	-5.65292	4.86878	-4.70592	-0.137375	3.81818	4.39708	-1.3223	-8.87787	-10.2384	-6.93004	-1.31857	-8.77418	-7.70275	-6.57331	1.62513	-0.0856215	6.43878	4.14132	0.807713	4.74036	-1.25993	-3.13519	-6.124	2.92051	-0.864388	-1.13034	-0.688379	-1.50243	-2.07391	-2.9647	-3.60926	-2.84527	-2.85375	-2.85763	5.07391	0.291783	-5.10282
BLCA__TCGA-CU-A0YR	3.22557	1.21039	3.18815	0.837018	0.235428	4.35699	2.96577	-1.29799	-5.33009	1.21633	4.77031	4.10062	5.89815	3.34676	8.34988	0.0649596	6.7214	-5.75338	5.02178	-7.01213	1.97779	-6.17964	-1.09391	-6.7607	6.1626	1.17769	3.85769	0.292981	1.17726	-0.454339	-8.95131	7.47967	-4.28191	-3.16413	3.88407	6.85845	1.4271	0.820171	-4.81071	6.02848	5.0717	5.12212	5.43941	5.00165	4.24606	5.10611	4.97246	7.80924	5.84536
BLCA__TCGA-CU-A3KJ	-6.03608	1.12797	2.13128	1.21516	0.419255	4.55593	2.92767	-0.912149	1.96402	2.2837	5.05865	3.46015	8.19927	3.69673	12.4051	-0.120498	1.37954	3.62054	1.6084	4.39946	8.3893	2.25264	-0.899585	1.02718	0.305604	-1.77838	-31.273	-0.458928	-3.18525	-1.96131	-0.604862	0.385866	0.980642	-0.0185192	-1.80831	2.93365	0.0343072	0.909526	2.0473	-0.106226	1.12885	-0.0583403	-3.03819	-4.75719	-6.54239	-1.93172	-8.54606	1.98136	-2.07452
BLCA__TCGA-CU-A3QU	-17.9057	-3.31401	-0.622092	-1.50761	4.61496	6.77091	3.17922	1.71887	3.96845	0.770454	-0.878528	0.182596	5.28924	2.32277	17.9324	-1.39771	-0.276799	7.86668	2.68285	10.7252	7.84031	12.8052	-1.84247	1.64262	3.03382	-1.04433	-8.4158	1.35749	-8.56484	-8.37088	-6.05195	-0.819147	4.69405	2.93324	1.48432	3.49062	-2.07513	2.73008	6.55364	0.882614	5.44539	-0.0555994	-11.108	-10.746	-15.2217	-12.0435	-24.6664	-8.64774	-7.84073
BLCA__TCGA-CU-A3YL	-41.1437	1.08593	4.32564	3.68945	9.27535	13.4921	10.2919	4.40945	5.0217	5.97539	6.76132	7.02813	4.05645	8.30018	4.58156	-0.930427	1.53085	3.45866	0.53573	4.55006	1.24236	2.4238	1.50971	0.106536	1.61013	-2.25188	-6.42626	4.14442	-0.0647696	-4.29122	0.568445	0.752352	1.57627	-2.5871	-3.32386	3.11173	-0.713221	2.93871	4.75674	-0.812421	1.87091	-1.45439	-18.2154	-17.3207	-18.8308	-17.4469	-28.7513	-13.4368	-14.6494
BLCA__TCGA-CU-A5W6	-12.9578	-3.40034	-0.00822143	-1.71832	3.75542	5.9219	2.6535	0.645188	0.773213	0.796473	-0.416262	1.46308	0.399728	2.79739	5.08485	-2.06735	0.805508	5.7737	0.582413	9.33631	5.1226	5.71386	-2.39069	0.146162	2.09852	-1.12373	-7.31839	-0.186297	-7.9204	-8.31052	-5.84118	-1.03766	0.201449	1.45407	-1.51908	3.79158	-2.56425	0.188613	1.83087	-1.12159	5.53546	-1.49227	-10.7832	-11.2312	-11.5763	-11.5373	-21.5276	-7.415	-8.19364
BLCA__TCGA-CU-A72E	-8.81704	-2.40455	0.826806	-0.828282	2.82269	6.04671	3.79841	0.561495	-1.58668	0.785877	1.058	2.76513	-1.04428	3.67621	1.45218	-1.38261	0.420649	7.57924	-0.392579	5.16056	1.91529	8.62958	-2.66627	-2.78895	-0.693372	-2.0092	-4.97987	-1.58674	-5.09054	-6.67595	-3.19076	-1.10763	-2.74036	-2.00962	-4.72119	1.94096	-2.16723	-1.64839	-1.45353	-1.30652	0.759865	-1.50782	-6.41656	-10.1963	-9.90976	-13.9665	-18.5121	-8.29974	-10.3095
BLCA__TCGA-DK-A1A3	2.28561	4.71481	3.67743	2.16371	1.87134	8.56341	5.52221	-0.351198	-0.290159	2.99835	5.5636	4.65601	-1.21589	3.91761	-0.400018	0.147114	2.9152	6.77994	-0.334933	-1.62968	-1.09868	-5.40956	0.504336	-5.15561	-3.33595	-5.69029	3.58518	1.90297	0.531729	0.183161	-0.239972	3.83236	-0.391223	-2.22063	-2.76293	2.66435	0.856397	-0.157392	-0.598699	-0.11191	-1.63107	-1.10126	4.71928	4.3541	-3.57117	-0.250055	4.42788	2.01254	5.74695
BLCA__TCGA-DK-A1A5	-5.52787	1.0551	2.53413	1.46218	1.45468	4.07671	2.95253	-0.323224	0.70605	1.89368	5.17251	3.28202	7.3653	3.67141	11.3967	-3.67547	-2.23556	3.27442	-1.59423	1.12028	-0.0616107	3.37922	-0.648854	-6.62969	0.269935	-2.26318	-3.47797	0.374788	-0.0655172	-1.67177	-0.871081	-1.89272	-3.2598	-2.7628	-3.84266	-0.1554	-3.96465	-3.71357	-4.07517	-2.03841	-1.83473	-3.57612	-4.13705	-4.03455	-6.12969	-6.65888	-11.7986	-3.73722	-3.26228
BLCA__TCGA-DK-A1A6	-12.0318	3.06987	4.26776	5.65203	6.50726	3.95557	3.10028	8.51895	8.55519	6.43224	4.57215	2.44679	7.00053	2.1989	12.0036	3.23428	4.55856	-8.19137	4.218	6.30382	7.48416	-8.14023	3.9225	9.91726	14.9891	8.14409	-19.3093	6.79615	4.11698	-8.72415	2.85982	-3.26158	0.746279	4.93419	5.30666	5.41153	3.94452	4.10204	5.40469	-3.3012	6.20818	0.102446	-11.5834	-17.8722	-25.0629	-25.9289	-37.109	5.28055	-2.60159
BLCA__TCGA-DK-A1A7	-45.2763	4.54211	3.76545	2.28134	10.0166	14.4191	9.86378	5.17815	4.07555	6.92464	6.12268	9.1244	3.95115	4.88584	7.5964	1.08635	3.0111	1.0637	3.19921	7.61453	5.8785	-7.2597	0.705713	3.22683	5.32218	1.86312	-6.67834	8.33088	-1.41912	-3.62862	-0.954061	7.59875	2.78072	3.13185	2.64168	4.09804	0.90079	2.88045	5.18067	2.52332	6.67015	1.79585	-14.516	-16.2049	-22.8977	-16.128	-29.8925	-14.1731	-13.527
BLCA__TCGA-DK-A1AA	-19.3268	-0.703455	1.72939	0.323008	2.72891	7.10286	4.52596	0.667218	1.70826	1.8497	0.631935	3.12075	-2.13883	4.40578	0.315765	-3.49072	-0.271429	3.5255	-3.04721	2.15842	-1.29197	5.38558	-0.884878	-0.490269	1.77447	-1.30675	-5.2046	0.515457	-1.93366	-3.96173	-0.59444	-0.169738	2.06803	-2.30277	-5.78039	2.74855	-2.18834	0.65482	2.9973	1.22286	2.82974	1.34704	-8.23957	-11.0228	-14.5095	-12.1837	-21.2532	-8.13528	-9.12613
BLCA__TCGA-DK-A1AB	-17.4205	5.34598	4.40332	2.1427	2.1117	7.44139	5.60113	-6.38089	-0.650592	2.91894	6.35202	6.91048	-1.84657	7.97264	-1.7376	1.49256	5.18534	6.26155	1.59636	-5.83753	-8.25013	-6.17143	-1.08565	-8.84778	-8.34422	-3.828	4.77559	0.393681	5.91636	3.92076	0.48918	8.51584	-5.58473	-8.2491	-10.1887	3.596	1.69352	0.317565	-6.0749	-1.44714	-7.08851	-6.47813	-6.0652	5.00541	-3.15084	5.32935	6.09815	8.01018	-2.03401
BLCA__TCGA-DK-A1AC	-7.08532	4.62656	5.35065	5.41309	2.1281	3.91794	6.25015	6.67403	9.59241	7.0226	5.11055	6.52444	8.40197	4.94243	13.6894	-3.04244	-0.618331	-7.59716	-2.49286	1.20552	9.8472	-8.84711	4.96993	10.8512	9.82931	6.32624	-20.2099	1.89215	-8.29393	-10.0668	4.73787	1.36085	0.86741	-1.52647	7.7602	1.64836	-1.80446	-0.182805	2.71864	-4.3373	2.16837	-4.52203	-8.44429	-2.51826	-17.0612	2.86393	-29.6403	3.84768	-1.24052
BLCA__TCGA-DK-A1AD	-24.3115	1.30743	2.50085	2.83958	7.51	7.77202	6.04044	3.79894	5.4561	4.54604	5.61894	4.37607	3.16701	4.55041	14.9877	-1.88356	1.35831	2.60295	0.162917	6.33697	3.55792	3.72871	0.925833	5.15691	4.38799	0.365313	-2.63776	4.21294	-1.03787	-0.809823	1.33431	2.24664	1.86936	0.186193	-2.42597	3.73605	-0.586767	1.49937	3.79145	0.142472	3.48312	0.223255	-19.1783	-11.9319	-33.0039	-12.6494	-23.5132	-10.5625	-7.86372
BLCA__TCGA-DK-A1AE	-44.6541	-0.439706	-0.336851	0.67621	6.3978	7.50577	5.35336	3.47733	5.60981	4.12109	5.49425	2.47538	16.7236	3.51694	27.4882	-6.24308	-5.70833	7.68173	4.02643	17.2866	19.5416	9.06833	-0.91395	6.58813	19.3246	11.5351	-7.04353	5.42874	-5.31882	-4.85999	-0.313762	-6.26628	-0.191213	2.68152	1.6966	0.661121	-6.13553	-0.15576	3.3763	-3.052	1.69682	-4.35595	-16.3532	-18.4746	-26.2741	-21.0377	-34.7264	-13.1325	-17.2103
BLCA__TCGA-DK-A1AF	4.97745	6.07791	8.99717	7.01588	-6.77858	8.04588	10.502	-8.1891	-7.40975	7.60307	6.0311	9.84044	-13.1841	4.83748	-13.6126	6.2859	8.00106	-1.39417	-0.678526	-8.94235	-10.1497	-7.05175	-0.809594	-8.50527	-9.3479	-9.3679	6.41817	-7.39344	7.90593	5.44667	6.44233	9.58697	-8.17375	-10.0076	-12.0864	-6.07528	-1.10273	-8.35122	-8.81343	-8.4577	-8.51972	-8.78422	7.09238	6.76807	6.4043	7.15765	6.71447	10.3478	8.11822
BLCA__TCGA-DK-A1AG	-30.3495	0.839617	2.4023	2.09438	7.45901	10.5236	7.65502	4.4981	3.56439	5.0591	5.48836	4.31351	-0.242451	6.48389	2.36699	-3.07368	0.440124	4.92577	-3.91822	3.28659	0.0257936	6.97476	-0.208437	1.11109	4.07677	-0.432432	-4.78891	2.47369	1.26421	-1.36388	0.42732	-1.20523	0.28623	-3.80779	-4.89136	2.12574	-2.53455	0.235195	2.1511	-0.707401	2.18793	-0.990959	-16.8145	-17.2138	-40.5473	-15.6723	-26.406	-11.509	-11.9222
BLCA__TCGA-DK-A2HX	-14.6241	1.03863	3.89697	-0.776531	0.647445	6.69504	4.5987	-4.56606	-4.39673	-0.157192	1.95412	4.71131	-3.61051	4.88011	-4.58033	0.24287	3.41407	11.0998	1.80082	-0.0591252	-4.34691	2.27194	-1.3395	-9.20646	-9.82196	-8.30656	-1.39903	0.475677	-0.555707	-3.41204	-3.94034	4.12653	-2.68378	-4.42886	-6.94722	2.10027	-0.503449	-1.62422	-3.21486	0.216698	-2.43985	-1.43076	-4.32063	-3.59803	-3.72975	-4.486	-5.69074	-1.37704	-4.37357
BLCA__TCGA-DK-A2I1	-6.41608	0.404068	4.65461	1.39354	3.31938	7.0438	5.82015	-0.11171	-1.11682	2.97599	5.31609	4.62325	-1.78973	3.33596	-2.56364	4.33737	6.76815	3.25116	0.575641	-0.14687	-0.830358	-7.59185	-1.52143	-5.92346	-2.6099	-2.28781	4.09727	2.58229	1.26625	3.01696	-0.611268	7.891	3.16631	-1.21385	-1.23431	5.69731	4.55359	1.55317	3.32646	1.47564	6.35916	0.722519	-3.91236	-1.93024	-0.808153	-1.07436	4.64916	-1.25941	-2.44639
BLCA__TCGA-DK-A2I2	4.23206	-0.683738	2.59572	-0.586633	-1.90704	2.73027	1.63685	-4.43591	-3.42687	0.284387	0.252259	2.62233	-2.61393	1.71148	-1.74926	1.47438	3.19035	10.4619	0.507148	2.49268	-0.782224	0.541383	-10.3289	-7.71559	-1.64365	4.64512	-0.320226	-3.41362	-0.849627	-1.48862	-2.27845	1.46648	0.520056	0.677143	-4.00048	3.83542	-0.109352	0.480109	0.137331	0.685468	0.641592	0.491613	4.78817	-1.0593	4.65382	5.74289	6.08071	9.03391	-2.43976
BLCA__TCGA-DK-A2I4	-7.93697	-4.57004	-2.95878	-2.44222	0.0518975	-0.297138	-0.50383	0.522536	-0.273991	-0.533899	-6.97289	-2.78554	-4.45409	-2.78159	-3.12454	-2.38184	-1.0296	-4.71929	-3.63937	-3.22604	-9.13664	-7.69347	-2.80853	-1.29317	-0.956722	-3.00818	6.23777	-2.5225	6.40928	6.05608	-1.1766	-2.51043	0.55866	-1.76276	-1.90337	1.291	-1.46102	0.164665	0.309108	0.412368	0.387009	0.861834	-4.9916	-7.8765	-7.51501	-14.0167	-16.5198	-0.0769436	-3.6262
BLCA__TCGA-DK-A2I6	-28.495	-3.22046	-0.970393	0.496904	8.1188	9.26765	5.35457	6.88855	5.31294	4.62625	5.1143	0.768677	14.0268	-0.132384	20.9243	-6.51897	-6.83399	5.52876	2.06863	11.7712	14.6325	6.55905	-0.396115	6.108	9.9373	9.28447	-9.50328	6.21606	-7.0197	-8.32612	-6.80793	-8.03343	-5.09548	-0.131488	1.88583	-0.833224	-9.47718	-6.03142	-4.34478	-4.1792	0.53051	-5.87046	-12.1055	-13.3547	-18.9197	-14.4586	-24.8743	-10.6731	-10.9783
BLCA__TCGA-DK-A3IK	-30.2695	-0.702632	2.40868	-0.414153	7.3921	13.596	8.79785	2.48017	1.92402	3.84286	-0.0564536	4.8438	-1.3282	4.44574	2.95011	-0.460871	4.23323	2.53467	0.407525	5.74194	3.59696	-0.95941	-2.79708	-2.30883	0.239531	-2.92381	-8.18781	2.04065	-5.41927	-7.8827	-4.09746	3.86299	5.33446	-0.49365	-0.767212	6.50213	0.386738	4.21487	6.71801	4.09441	7.26418	4.59376	-15.1493	-18.2941	-19.5944	-16.5259	-27.1472	-14.7263	-12.9325
BLCA__TCGA-DK-A3IL	-38.0931	-0.585352	1.68162	2.74714	10.0902	14.1288	10.2084	5.74518	6.00038	5.835	0.68826	4.75258	6.6384	4.66048	9.83076	5.99293	7.30127	6.23521	4.87362	12.4854	14.5773	4.48567	1.10411	5.32103	6.86302	2.59869	-9.96455	7.68462	-5.797	-7.33561	-3.5399	7.80215	5.45429	7.10285	3.05224	4.07995	1.57851	5.79106	8.54422	2.70998	6.14877	2.14717	-18.3015	-21.9456	-26.7579	-20.2509	-35.8148	-17.1487	-16.5604
BLCA__TCGA-DK-A3IM	-26.9337	-1.94799	-1.66527	2.05923	7.76028	11.4822	7.64737	4.70037	6.04041	4.72615	6.27957	1.88031	16.992	3.30755	25.0073	-2.53696	-2.71707	8.35085	4.72616	15.8273	18.3841	10.9663	-0.388388	3.81769	7.18972	1.07724	-10.8379	4.84693	-10.8482	-11.536	-7.42908	-3.98963	-0.901334	3.53907	1.72269	-0.424424	-4.82326	-1.15755	1.67716	-2.72928	1.54424	-3.66262	-15.3494	-17.9478	-21.5895	-14.7888	-26.0798	-10.3795	-15.9353
BLCA__TCGA-DK-A3IN	2.40221	1.77158	2.36936	1.29269	1.21162	5.75853	4.252	-1.60866	-1.31317	1.86814	5.70589	5.38283	-1.60086	4.22292	-0.952526	-0.400427	2.13368	2.05181	-1.33093	-3.50722	-3.20282	-7.53487	-0.465107	-5.38604	-5.2734	-5.03019	3.81725	0.803274	0.737915	0.542141	0.168727	4.02908	-1.62377	-2.92475	-4.90388	1.72409	-0.985742	-1.41986	-1.49657	0.0230089	-0.992666	-0.699865	-3.17562	-3.4751	3.24431	-1.49648	4.02312	-1.3243	-4.43219
BLCA__TCGA-DK-A3IQ	-16.5749	-2.15154	1.63011	-2.26392	2.27535	9.23433	5.81053	-4.35929	-4.41246	-0.713673	-2.83698	3.16946	-7.72659	3.10746	-7.19278	-6.06933	-4.27543	9.86062	-5.47592	-0.679979	-6.09179	10.9083	-3.49267	-13.2336	-9.06263	-9.1156	-4.54126	-1.2342	-6.96002	-9.37133	-6.38503	-3.36099	-6.28329	-13.2613	-12.3902	-1.45596	-5.98056	-5.84279	-6.15907	-4.79916	-7.37525	-4.58814	-4.7024	-7.66378	-6.83155	-9.39622	-11.5593	-3.94411	-7.99005
BLCA__TCGA-DK-A3IS	-37.0104	-2.04967	-0.0858183	1.24215	8.18147	9.70818	5.68605	5.29961	5.86268	5.35175	6.49857	2.20536	13.8285	3.6292	21.908	-3.19871	-3.07686	7.12668	2.46378	12.3789	15.4686	9.77375	0.52693	4.54246	8.65064	2.76152	-8.55885	6.48674	-6.57016	-7.30916	-4.4234	-4.3117	-0.671319	3.01318	0.19805	1.11425	-5.04252	-0.484396	1.8341	-2.49056	3.29508	-3.46505	-17.0558	-17.0639	-23.2572	-21.0865	-33.9077	-14.2135	-14.2478
BLCA__TCGA-DK-A3IT	-8.8311	-0.0389607	2.96083	1.92059	2.7247	5.30772	3.70001	0.659841	-0.885104	2.23082	0.686568	2.35172	-1.5459	2.0586	8.96926	5.77258	8.37101	5.30378	6.414	7.23281	7.84604	-2.62385	-0.50857	-6.76702	-0.665852	-2.95147	-1.74498	0.55277	0.937987	0.113567	-1.83635	8.87958	6.61367	-0.520137	5.73488	8.31272	6.07909	6.79801	6.81908	3.13678	2.47023	6.30929	-2.15759	-2.18817	-6.16298	-7.21298	-10.7712	-1.55353	-1.90201
BLCA__TCGA-DK-A3IU	-11.067	-4.29324	-1.86007	-1.21152	0.915451	0.729731	0.38638	1.96966	-0.364033	0.748014	-6.12429	-1.01206	-9.69721	-2.76299	-9.46954	-0.165244	1.2649	-7.61212	-2.21186	-2.17249	-2.00569	-7.01756	-1.81793	-2.37435	-0.842516	-1.91962	6.2993	-1.32068	7.06434	6.48498	7.45394	-0.956119	2.60369	0.213944	-0.864943	3.54434	0.505639	2.17598	2.39799	2.89565	2.65876	3.14245	-6.66243	-9.78425	-12.719	-17.21	-18.6407	-1.64618	-3.96397
BLCA__TCGA-DK-A3IV	-25.5723	4.63245	6.48392	6.34693	7.30836	1.0834	7.27214	6.49183	7.21648	7.02354	-6.16268	-2.9158	6.35763	-1.80017	2.89856	5.49182	8.15674	-7.48234	5.76341	0.320172	1.61995	-5.54419	4.52581	0.75051	6.07605	1.45307	-19.4245	0.603181	4.87653	4.21492	5.5069	7.35026	7.71592	4.81403	5.02627	9.02929	7.11673	7.95245	10.2889	5.76742	7.96214	5.82684	-20.8053	-22.7878	-34.565	-23.786	-36.2077	-3.32565	-6.20609
BLCA__TCGA-DK-A3WW	-2.4112	-8.26479	-5.63384	-2.4066	1.71	-5.38299	-5.81734	3.96712	2.73683	1.36076	-9.96379	-5.68516	-1.03872	-4.84269	3.04533	-6.18957	-3.11135	-7.88906	-7.25279	-5.97944	0.773065	-6.50755	-9.48382	1.08585	3.97875	6.30539	-25.745	-0.984081	-11.5043	-12.5731	-3.29804	-6.47021	0.250126	-7.22151	0.204156	0.288113	-6.63736	-5.11233	-5.12564	-4.2073	-4.41511	-4.09313	-9.90428	-14.8557	-17.7244	-27.0088	-29.9059	-2.64853	-7.85808
BLCA__TCGA-DK-A3WX	-5.64167	1.62404	2.59525	0.964469	1.88136	4.07906	2.81118	-1.18896	-1.69764	1.89719	5.26572	3.61726	6.28834	5.91531	9.36087	1.27751	3.67549	-4.96866	-0.89314	0.542409	5.68689	-3.93764	-2.43512	-6.61862	10.0241	6.16258	3.70877	-1.36424	5.20991	3.81345	-0.344164	2.4636	-0.537017	-1.99101	-4.52865	3.26333	-0.45905	-0.714291	-1.35445	1.07943	-0.0919232	-0.0738933	-1.42872	4.08133	3.49905	4.93035	4.92909	7.55598	-0.562551
BLCA__TCGA-DK-A3WY	-32.6254	-4.70371	-0.0771222	1.73645	3.84756	2.90644	2.47541	5.25917	4.036	3.95384	-6.44033	-0.447073	-2.15332	-2.33053	-0.212193	2.05538	3.82284	-10.1787	-0.0377237	-0.0869625	1.1311	-8.45359	0.00805912	1.78624	1.46978	0.636333	-16.327	0.786434	-6.07788	5.53344	-0.0957177	1.25346	5.86501	2.98846	3.20948	6.8168	3.28097	5.11927	5.74042	5.30725	6.50847	5.36124	-15.9146	-17.0069	-25.8571	-23.5412	-27.2451	-4.36179	-9.00617
BLCA__TCGA-DK-A3X1	-17.9415	-0.773076	2.08813	1.25349	7.22877	9.34966	6.16096	3.29221	3.52412	5.17764	5.73986	4.2366	4.71694	3.78407	16.4707	-5.20804	-3.06269	3.09274	0.787103	8.91374	5.82293	1.83126	-0.665439	3.0277	6.85988	7.04159	-6.06874	4.17623	-4.94181	-5.64809	-3.16378	-3.33172	-1.55823	-0.652552	-0.890738	0.315854	-5.45894	-2.94282	-0.341161	-3.20337	2.30986	-4.67202	-11.9505	-12.4651	-14.8919	-14.5019	-21.1843	-12.3506	-9.78032
BLCA__TCGA-DK-A3X2	-38.0815	-3.72185	-3.34798	0.978072	7.78692	10.916	7.49659	4.57439	7.18296	3.77427	6.88312	-0.40976	19.1584	2.21853	27.4643	-3.89144	-6.23092	10.6485	5.99321	23.6376	20.8064	14.336	0.0395464	5.73704	9.82981	2.72507	-12.281	6.03406	-12.7437	-13.1485	-8.44413	-7.29659	-0.561048	4.43411	3.25282	0.0664017	-6.01238	-0.543061	2.28701	-2.5427	0.779239	-4.20708	-19.3344	-19.4593	-26.6572	-19.738	-33.0693	-13.0325	-17.917
BLCA__TCGA-DK-A6AV	-24.6189	4.13954	3.98078	3.0156	7.50676	9.09553	6.84036	4.73664	4.42638	7.48897	5.34564	7.42958	9.74819	6.33277	14.8636	4.64871	5.96948	2.08932	6.09307	11.3173	11.7687	-5.90686	0.73254	9.65764	12.9345	7.78909	-3.00158	8.95236	0.218662	-0.915517	-0.0630448	6.86064	6.31415	8.43612	7.53277	5.69802	1.80878	3.11196	8.8567	1.67236	8.44898	0.697504	-5.87154	-6.23465	-11.9024	-7.60308	-17.2584	-5.98011	-3.47673
BLCA__TCGA-DK-A6AW	-23.0518	-3.99275	-0.0637879	-2.85094	4.78589	6.9725	2.71703	2.22648	-0.831478	0.187565	-2.4821	0.457644	-2.27211	0.936404	1.08829	-5.72802	-2.5391	0.689486	-4.07127	2.04714	0.949605	2.39907	-5.03295	-10.1185	0.46705	-2.2272	-6.80049	-0.866276	-5.19842	-6.86092	-4.26336	-3.41501	0.366592	-4.74663	-3.83343	1.94762	-5.83542	-1.35477	1.08505	-1.76534	2.33488	-2.28496	-12.846	-13.1401	-14.6553	-15.0739	-26.96	-12.3235	-11.3171
BLCA__TCGA-DK-A6B0	-31.1923	-3.03559	0.190855	-1.83005	6.98295	10.9012	6.54707	4.21733	2.38108	2.93294	-2.44605	1.9696	-2.54641	2.46264	3.38156	-6.45244	-2.68464	2.01984	-6.23707	3.45195	0.51635	9.66117	-3.51676	0.30333	5.11477	0.543585	-7.95991	0.786631	-5.44498	-7.90509	-3.87518	-3.85065	1.20698	-5.87343	-5.62218	2.95128	-5.42085	-1.00758	1.74838	-1.06951	2.53001	-1.09208	-16.4003	-17.2511	-19.3083	-16.4778	-26.188	-12.811	-13.888
BLCA__TCGA-DK-A6B1	-24.5474	-1.07803	1.06225	-0.871053	6.57682	9.74219	6.24775	2.47016	5.00555	2.61916	0.754841	2.77462	4.98998	3.52657	8.52982	-4.35128	-2.2968	4.7736	1.38912	10.8952	6.9534	10.1875	-1.18416	2.45769	2.96574	-0.457973	-9.29507	2.39342	-7.86034	-8.65104	-4.58796	-1.8554	3.89983	-0.586593	0.522711	2.37077	-3.5617	2.29986	5.94364	-0.945341	4.27976	-0.952355	-14.0899	-13.9367	-17.328	-15.271	-29.8886	-12.9601	-11.2377
BLCA__TCGA-DK-A6B2	-1.22274	4.59403	6.70214	1.14375	2.97096	6.31722	5.24362	-0.950831	-1.34649	1.76648	5.3544	5.46844	-3.40945	4.95269	-9.24302	-0.209809	7.08534	3.624	-0.332942	-7.05961	-7.7914	-7.6624	-1.21052	-7.23393	-4.94126	-4.48623	4.61625	0.678937	5.77944	3.82593	3.98682	8.04957	-0.681249	-3.79627	-5.53388	1.84766	0.207151	-0.170504	-0.816871	0.0853062	-0.963294	-0.931852	-6.13237	-5.17331	-3.80828	-2.74366	4.66483	-1.06697	-5.93324
BLCA__TCGA-DK-A6B5	-13.6451	0.592882	1.10422	1.74088	2.32363	5.4308	3.92544	0.537488	-0.988502	2.97705	5.82155	4.36195	-0.30926	4.3047	-0.519994	-1.26824	1.1481	2.97124	-1.34278	-1.15285	-2.43477	-0.731132	-1.58703	-7.96943	-2.39487	-5.52797	-4.2697	0.688254	-1.68099	-4.18776	-2.53527	-0.875182	-3.34804	-4.65649	-4.76787	1.46745	-2.13281	-2.99561	-4.20104	-2.30891	-2.08686	-3.32225	-3.61042	-4.23215	-8.93887	-3.545	-6.24946	-0.806717	-3.31179
BLCA__TCGA-DK-A6B6	-17.0255	4.20296	5.93733	0.956628	3.71419	4.67198	3.58204	8.18214	8.39671	6.20261	4.26341	6.19572	-0.440513	5.81158	8.78543	-0.718709	6.29903	-1.48426	-0.632556	-1.92942	-1.63465	-7.29547	-1.34482	1.51456	3.35449	-0.685112	3.70473	0.645753	5.33444	4.04949	5.34583	6.0006	8.06414	-3.33023	-2.66731	8.42315	-0.172871	6.40553	9.84966	4.7829	9.31072	5.53148	-23.1824	-27.0239	-41.2373	-34.2141	-50.7749	-2.75204	-6.27853
BLCA__TCGA-DK-AA6L	-12.2716	0.685437	1.9098	2.32618	5.09099	8.23453	6.0456	2.67564	0.95977	3.94923	5.36747	4.2934	-0.317676	4.46263	-0.152214	-1.05087	1.82668	2.59736	-0.337178	-1.08725	-1.70945	-1.2169	-1.04502	-6.23027	-0.641844	-2.44241	-3.52583	1.17815	-2.54445	-4.6973	-2.34895	-0.193315	0.539526	-1.43174	-3.39145	3.02169	-1.74671	0.288916	2.31366	-0.0317054	2.94994	-0.87021	-6.9114	-7.6739	-9.31273	-4.07888	-8.80827	-0.212722	-4.31548
BLCA__TCGA-DK-AA6M	2.35339	0.598399	5.05594	1.84767	5.23568	4.40767	3.30843	5.88074	-4.33255	5.73957	4.48397	5.80295	-6.36903	2.53855	1.50444	4.07212	5.80161	2.56977	-0.532082	-5.01658	0.903346	-7.13399	-6.36014	-0.18152	6.51754	5.3116	4.62982	1.50963	4.95586	3.28436	-0.0866721	6.10417	-5.38182	-2.0691	-4.44966	1.35836	-0.258712	-5.10509	-5.77033	-4.74425	-4.20729	-5.60032	-3.14664	4.13786	3.72885	4.68726	5.04323	7.45788	-3.79242
BLCA__TCGA-DK-AA6P	-44.1573	-0.889758	0.93635	2.48362	12.2664	17.3505	12.3939	7.08535	9.2938	6.1255	1.49287	4.16792	10.7287	5.43402	15.3507	-4.06263	-3.08778	5.52877	3.75425	14.9443	9.72737	9.36912	1.43083	6.81904	9.21346	2.65133	-8.73128	8.53304	-8.01132	-9.34455	-2.92836	-3.59125	3.48154	3.30724	-0.169347	2.75061	-2.73252	2.4525	5.76772	0.238859	3.95638	-0.187742	-21.7744	-20.2188	-27.1211	-22.0177	-36.2418	-16.428	-16.7223
BLCA__TCGA-DK-AA6Q	-10.9196	0.642377	3.21505	0.416439	1.34166	5.54239	3.61364	6.61305	-2.95675	2.17949	0.0496431	4.34093	-2.13498	3.14217	-1.03183	-0.442032	1.00001	0.636596	-1.17023	-1.94449	-3.28486	-7.55512	-2.3035	-7.20183	11.1719	6.64736	4.47111	0.653084	5.94972	3.88216	4.33703	0.87076	-2.78141	-4.2571	-5.23197	1.22658	-1.79799	-2.53131	-2.93497	0.218282	-0.204663	-4.74057	-2.70826	-4.08345	-7.11734	-2.23677	-3.1606	0.105788	-0.791599
BLCA__TCGA-DK-AA6R	-21.1737	-0.424631	1.12446	0.188552	3.2112	3.81877	2.28241	1.20531	1.41664	1.84862	4.91461	1.63588	8.3548	1.22543	13.6297	-2.93032	-2.01624	4.15449	-0.486788	2.22633	9.19148	-0.370613	-3.03146	-7.93477	12.5578	7.88027	-7.20384	-0.825914	-1.80596	-3.04754	-0.989115	-2.74416	-1.72059	-1.27909	-4.13358	0.680932	-3.86557	-2.27555	-2.58228	-3.0358	-2.38006	-3.71615	-6.6878	-9.7176	-13.2804	-9.10259	-17.6987	-4.40731	-7.6882
BLCA__TCGA-DK-AA6S	-11.0402	6.10086	8.0722	2.98306	3.17244	8.0336	6.15432	-0.930836	-0.878489	4.27723	6.98985	10.1258	-2.03984	8.4073	-2.54639	-1.34153	1.45637	2.18317	-2.23964	-4.86829	-5.80435	-8.67867	-0.402744	-7.02523	-8.01589	-6.83153	4.93287	1.25936	6.30528	-0.0222012	-0.904432	2.35148	-3.45574	-6.15911	-7.62899	1.63928	-1.13607	-2.30762	-2.44761	-1.30033	-2.88818	-3.15652	-2.93312	-5.24786	-2.27804	-1.72638	5.56781	2.13769	-2.30875
BLCA__TCGA-DK-AA6T	-48.1557	-2.76322	-2.20995	4.91288	0.445619	0.456185	0.350142	2.33144	9.63118	1.88154	-3.88433	0.327035	0.291022	-1.75546	3.25506	8.50842	10.256	-13.2473	7.50805	11.435	12.2213	-13.5371	-0.513846	0.981026	1.83366	0.86991	-19.6262	0.351603	-9.04175	-9.12011	-2.44041	10.0121	19.4851	14.8491	14.4627	18.0003	10.6859	18.621	22.9768	13.5758	21.635	14.2391	-9.52411	-14.9931	-44.2791	-19.7781	-25.7454	-0.139032	-4.60915
BLCA__TCGA-DK-AA6U	-38.7679	-1.6766	-0.714956	3.53806	11.2839	14.3798	10.5501	8.12193	9.45981	7.35111	1.08349	2.44209	16.2464	3.41432	23.2478	-3.60602	-3.12644	8.07062	2.95407	15.446	17.8086	12.9471	2.13099	8.26963	11.0824	8.94848	-10.1675	8.23026	-7.12541	-8.39262	-3.60939	-4.40709	1.49674	4.00233	0.712981	2.47845	-4.33018	1.09456	4.66715	-2.00437	3.12277	-2.45266	-19.5685	-21.3115	-27.9874	-21.362	-37.1585	-16.748	-15.4765
BLCA__TCGA-DK-AA6W	-45.1666	2.02644	1.42646	4.66087	9.80152	15.4931	12.4692	4.57167	6.41178	7.57205	7.61154	6.97596	17.7686	5.16832	25.3338	-1.38522	-3.27665	10.3372	6.15491	16.2094	18.613	6.0236	2.30289	7.60135	9.26226	3.21788	-5.46012	10.0465	-6.89793	-8.61614	-3.58002	-2.45327	-3.85484	3.57613	0.584363	-0.883738	-4.65155	-1.1521	-0.0355077	-4.8697	-1.35813	-6.53546	-15.4336	-13.3746	-24.5522	-10.0343	-15.8224	-4.21799	-12.0153
BLCA__TCGA-DK-AA6X	2.26437	1.07797	2.41053	0.0915191	1.33866	3.47558	3.12673	-1.04313	-1.02404	1.68069	4.17677	2.19846	-2.58372	3.39771	-1.85332	1.24922	7.12636	9.55414	-0.150523	2.25531	-1.24858	5.16878	-1.44812	-5.97131	-6.10638	-4.89499	-0.526151	-0.721054	0.233666	0.26647	1.09379	6.90296	6.26446	-1.28722	3.94436	8.07291	2.27978	6.46626	7.81547	0.90773	7.5747	1.17916	-3.39545	-4.00511	-3.29688	-2.7124	-6.2912	0.483563	-6.35294
BLCA__TCGA-DK-AA71	-33.6145	-1.50314	1.52985	0.329645	8.75923	12.5328	7.87143	4.09931	3.26404	4.23056	6.45133	4.02203	4.93557	4.82841	9.05877	-4.93873	-2.74824	5.54409	1.38904	11.942	6.73515	7.78535	-0.371306	3.17478	6.95825	2.23388	-7.80141	6.40246	-6.15438	-8.15467	-5.02028	-3.68275	-2.4277	-1.7655	-1.82797	1.94929	-5.59956	-2.61434	-1.2319	-1.79212	2.10101	-3.28875	-17.091	-19.1248	-23.6254	-19.1032	-33.3512	-13.781	-15.2387
BLCA__TCGA-DK-AA74	2.76682	3.55855	5.84702	0.514892	-3.79416	-2.92121	-3.73416	4.59542	-6.93467	4.88338	4.5233	5.63377	-9.3478	1.55922	-8.98997	-0.0103122	5.18346	-6.33226	-6.93984	-6.91615	-7.83145	-6.75794	-7.45776	-6.46409	-4.69872	-0.254363	6.37642	0.388961	6.07562	4.35192	3.91222	5.77101	-6.73566	-8.34414	-8.87473	1.415	-6.99328	-6.35079	-6.84058	-4.56771	-4.49746	-6.10728	4.06992	4.50174	4.68581	5.74835	6.33536	7.86103	5.78264
BLCA__TCGA-DK-AA75	-48.3845	-3.4771	-0.592017	1.35223	12.6806	17.8578	11.8597	8.33548	8.54391	7.39927	0.727771	3.71056	12.2603	2.67394	25.6628	-5.1897	-5.42982	7.19723	5.11779	19.9049	14.3461	9.37449	-0.804923	9.17121	14.2158	6.75066	-13.0381	10.0082	-10.929	-12.4934	-6.7991	-6.76702	0.556598	2.517	3.0668	2.52251	-6.29354	0.182175	3.7508	-2.19943	3.58311	-3.52326	-25.447	-26.6265	-29.3396	-25.8597	-42.2806	-20.8365	-23.2523
BLCA__TCGA-DK-AA76	-36.1334	-2.66253	-1.92511	-0.550253	8.64998	12.4357	8.13879	3.67242	6.83895	3.20436	0.607069	1.44052	11.5301	3.87667	24.3813	-3.18537	-2.98236	8.75688	5.21501	18.0926	12.1892	14.3141	-0.173734	7.74012	9.77417	3.30628	-10.9466	6.77436	-10.5006	-11.2851	-5.78978	-4.23704	3.91596	5.25852	1.5934	4.13218	-2.42389	3.62369	7.49482	-0.256849	4.2415	-0.383744	-19.1921	-20.4938	-25.2888	-22.9302	-38.1432	-16.5951	-17.082
BLCA__TCGA-DK-AA77	-21.3664	3.95053	2.98802	0.916318	2.12897	4.92548	3.33455	0.641829	1.73983	1.60609	5.12775	4.77135	-1.85178	4.22479	11.6414	-0.905308	1.83249	2.5915	-1.00719	-0.000992572	-1.55289	-2.75818	-0.621444	0.580435	2.88264	6.02308	-2.01417	0.737667	1.37137	2.98947	0.645917	1.8009	-0.572899	-2.79234	-2.49183	1.73501	0.0115204	-0.0548213	0.819101	-0.53219	1.5948	-1.0696	-5.30098	-5.17248	-12.2291	-7.34335	-17.4662	-4.08814	-3.90105
BLCA__TCGA-E5-A2PC	-16.2253	-1.15531	0.666239	0.613534	3.58865	2.66847	1.66027	2.12529	2.56295	2.13213	4.83813	1.94325	8.39727	3.58743	14.1275	-3.75233	-1.24917	3.15615	-1.5312	2.88248	0.476847	6.99444	-1.30171	2.41419	13.0632	7.90598	-4.096	-0.120298	-1.04556	-1.70735	0.395942	-2.57355	-1.61862	-2.94048	-2.64593	0.223781	-3.7387	-2.55459	-0.547273	-2.30617	0.855058	-2.6287	-11.9411	-12.6453	-14.7856	-14.3889	-23.949	-7.32868	-9.53545
BLCA__TCGA-E5-A4TZ	-28.9859	-0.472825	-0.394955	3.22472	7.35105	8.70996	6.93845	4.49701	5.06788	4.37432	6.73818	2.99575	14.1175	4.59659	19.3535	2.46719	2.9464	5.1397	2.77423	10.8171	15.3852	7.31658	-0.507374	1.89196	4.94062	0.0504484	-8.03266	2.234	-6.9729	-7.35555	-3.51983	1.87962	5.21071	4.24423	0.707977	4.72873	1.32465	5.67127	8.5143	2.34584	5.9139	1.86529	-12.5889	-13.6495	-20.8028	-12.676	-24.6216	-6.99351	-9.78915
BLCA__TCGA-E5-A4U1	-50.3967	-2.10184	0.563472	2.86865	13.1458	17.5872	12.7415	9.23754	9.11201	8.21628	6.63617	4.94497	10.6415	5.61294	15.3262	-4.56717	-2.54094	4.886	2.23203	15.3368	9.63891	6.20876	0.474232	4.6837	8.91379	2.39495	-10.194	8.53988	-6.44624	-9.56425	-3.5774	-4.30562	1.89455	0.214343	-0.471506	3.72546	-4.28751	2.20676	5.09494	-0.841075	4.08187	-2.05304	-24.5929	-25.6558	-30.2093	-24.0395	-38.3722	-18.0607	-21.1727
BLCA__TCGA-E7-A3X6	-12.5517	4.47654	5.47997	1.74275	1.22541	5.43787	4.16748	-0.77823	-0.54543	5.91411	5.48634	6.62193	-2.55586	6.09759	-1.99859	4.26731	6.49431	4.40079	-0.638279	-1.21563	-7.59847	-4.65356	-1.30594	-7.39423	-2.17002	-3.6046	4.39945	-0.407163	5.75388	4.13586	-0.56927	2.88419	-0.0666112	-2.90628	-6.05162	3.46501	0.221856	-0.433695	-0.529711	-0.233133	-0.540025	-1.2129	-5.88145	-3.8726	-5.0132	-3.28412	-6.89836	-0.738878	-3.90175
BLCA__TCGA-E7-A3Y1	-43.1631	-0.0609197	2.31512	1.84752	9.85368	11.7536	8.30206	6.82281	6.26914	5.12519	5.36478	3.90354	1.54719	6.88508	5.78	-3.45055	0.619385	3.91617	-2.31746	5.3508	1.66601	6.01928	-0.847392	0.948576	5.30649	0.826599	-6.77579	2.95401	0.143372	-2.53228	2.07049	-0.199316	4.39513	-2.7162	-4.07631	4.81582	-1.98336	2.94712	6.04068	0.689704	3.85628	1.28345	-20.9005	-19.8705	-42.9006	-20.4973	-33.0331	-15.8622	-16.6951
BLCA__TCGA-E7-A4IJ	-29.2738	4.53237	3.97222	5.74537	11.38	10.2059	8.22957	10.6793	10.3811	8.80609	5.53494	8.11509	0.34164	6.48251	12.1791	-3.36465	-1.0142	2.05077	-2.9296	2.71891	-0.156742	1.73143	1.30373	4.32585	12.1703	7.2062	-1.96462	4.90368	4.85687	2.83354	4.13067	-1.20818	-0.622359	-3.70522	-3.4857	1.39042	-3.34426	-2.12913	0.881398	-3.50794	1.17111	-3.80775	-21.3879	-12.5291	-37.6054	-13.284	-24.8934	-10.9766	-7.59796
BLCA__TCGA-E7-A4XJ	-34.8012	-3.23995	0.387173	-0.677937	7.49518	11.6467	7.16405	4.72121	2.97695	3.31458	-1.17729	2.75079	2.14203	2.62181	6.53458	-3.64661	0.209786	4.75186	-1.29497	7.80938	4.70668	6.96721	-2.26162	0.752301	4.10253	-0.494003	-9.73304	2.28777	-6.61251	-9.51784	-5.33514	-0.167075	1.81299	-1.95427	-2.94928	4.11734	-4.04939	0.546216	3.48497	1.28659	4.19269	0.25398	-12.4125	-16.4561	-21.5485	-17.2754	-27.6781	-12.9415	-12.3423
BLCA__TCGA-E7-A519	-20.3814	0.0801198	7.84146	1.47541	9.4495	11.1253	7.44352	5.46564	0.149952	7.21875	0.148455	8.45448	-7.88202	3.31181	-7.05003	3.72633	6.76362	0.285184	-2.74195	-7.92283	-8.27957	-8.28059	-1.90775	-9.26297	-7.04844	-3.50198	3.76414	0.674113	5.73813	2.86734	0.76744	3.44097	0.865191	-3.96266	-6.31139	5.35015	1.50883	0.989111	1.67584	2.44103	3.44348	0.788697	-8.11658	-7.93999	-8.22502	-3.07734	-3.49	-2.88337	-3.12039
BLCA__TCGA-E7-A541	-12.5966	3.63995	5.04122	5.30703	6.64155	6.03669	5.40268	7.63847	4.52174	6.32284	4.73988	5.89101	5.60197	5.04132	8.11452	4.11103	5.43886	3.40783	4.14928	-4.95877	1.94373	-5.43851	3.50578	0.647051	8.72843	5.7377	3.96878	6.42588	5.31471	4.09832	4.16804	5.89963	0.214673	3.18846	3.49183	5.19652	0.566785	-0.0823948	0.490422	0.0425757	4.49446	-4.19236	-15.1496	-1.98224	-3.83666	-1.49606	-4.59513	0.0939559	-2.70744
BLCA__TCGA-E7-A5KE	-34.4932	-4.14397	-1.76105	-0.337562	8.20119	11.2889	7.37053	4.10354	6.14498	3.07488	0.611251	-0.0755819	17.0293	2.61821	23.5571	-1.89332	-0.290414	9.35508	6.56886	18.7054	19.5783	14.3622	-0.450915	6.82677	9.85854	2.6763	-11.1557	6.63982	-9.29064	-10.6176	-7.56632	-2.24822	4.88302	6.55523	3.47178	5.22899	-1.89724	4.30955	7.53069	2.10736	7.38457	1.28787	-18.333	-20.808	-24.5856	-21.9332	-36.8875	-15.241	-17.5717
BLCA__TCGA-E7-A5KF	-33.1153	-2.01579	0.319671	-0.166541	8.10106	10.9834	7.1841	4.29786	6.00478	2.87756	-1.12125	1.66119	3.05095	2.97951	6.50617	-5.60784	-1.43198	1.43845	-0.962236	7.8031	1.71004	7.26498	-1.89214	0.267267	5.38012	-0.403984	-10.0176	2.17664	-7.50478	-8.64505	-2.77685	-1.69764	4.21539	-2.63032	-2.12211	3.70516	-3.22625	2.20817	5.62726	-0.283866	3.80948	-0.289139	-18.4937	-18.5923	-22.5665	-19.0222	-32.8192	-14.8545	-15.1521
BLCA__TCGA-E7-A677	-20.3986	1.00421	2.68844	1.65187	5.00001	9.37887	6.61087	1.02616	2.16971	2.98143	1.51508	5.54325	-0.541808	4.84234	2.22118	-2.82571	-0.368016	4.71605	-2.0931	2.31811	-0.744481	4.27979	-0.351782	-6.83874	1.55317	-2.00645	-3.95865	2.44112	-1.72587	-3.35332	-0.109394	-1.06813	-2.19743	-4.516	-4.38329	1.17671	-3.32514	-1.97534	-0.889752	-2.20608	0.272173	-3.91703	-7.77861	-11.4548	-12.4973	-9.68396	-17.7938	-6.91504	-9.2256
BLCA__TCGA-E7-A678	-32.2719	3.68733	3.05028	1.0993	11.362	10.3949	7.46063	9.62061	4.55349	7.29976	4.93047	6.86671	-3.83651	6.47258	1.34594	-2.43028	2.66089	-2.05565	-5.31348	-1.08899	-1.64407	0.0317817	-2.46094	0.375841	5.20219	1.23208	-5.3116	0.813343	4.56829	-0.398964	2.0207	1.1954	6.65763	-3.65855	-3.98527	6.94927	-0.0791881	3.97957	7.70445	2.94002	8.33032	3.86145	-29.0276	-18.3059	-43.2997	-16.9568	-27.2181	-13.4998	-12.6627
BLCA__TCGA-E7-A6MD	-18.7377	4.91453	7.22828	0.210334	0.972594	5.14927	3.61474	-0.676389	-0.185563	1.40602	5.68074	8.96655	-2.55381	6.58721	-2.29946	5.27795	7.78626	3.83376	0.972916	-3.74253	-4.32611	-6.48168	0.40396	-5.52677	-5.4357	-4.31688	4.12773	2.58541	5.77843	4.1092	4.9504	8.36777	5.05686	3.66272	-0.495781	6.59758	5.89572	4.81124	5.53355	5.12244	4.38717	4.80462	-4.03397	-5.09864	-7.02427	-3.40809	-8.59855	-0.979042	-4.30694
BLCA__TCGA-E7-A6ME	-48.8131	5.94421	4.06952	3.34915	9.93437	15.2939	11.5947	5.54557	5.79228	6.91567	7.02631	10.9053	3.01956	6.84893	6.56244	-1.10735	1.88561	1.87337	2.45851	7.7446	4.61782	-0.515378	-0.234307	0.953863	4.13075	0.0165796	-5.05243	5.29843	-1.44752	-3.32735	0.198841	1.69274	0.997161	-0.500701	-0.783176	2.62321	-1.29681	-0.47246	2.78658	-2.03433	3.77779	-3.24939	-18.2008	-16.5626	-24.8452	-14.1303	-26.3159	-11.054	-10.9309
BLCA__TCGA-E7-A6MF	-32.261	0.586238	2.16926	-0.655351	3.84079	9.31387	6.23174	0.136941	1.37728	0.283557	-4.42949	3.29253	-9.46621	4.6069	-3.78718	-4.17461	3.21034	4.53357	-9.68861	-3.71798	-7.77924	11.5604	-2.9098	-12.3263	-5.73374	-11.6446	-4.80298	-3.19511	5.95213	-2.27103	5.77559	2.75505	7.14339	-8.46516	-9.82762	7.20139	0.497265	4.94473	8.05046	4.36511	3.90526	6.33809	-11.5185	-15.7072	-21.2675	-15.3803	-24.423	-12.4484	-7.83956
BLCA__TCGA-E7-A7DU	-37.5162	-0.396875	1.80026	2.16228	10.4227	13.9543	9.98457	6.76354	6.51737	6.8483	5.76576	5.67179	3.52149	4.56828	7.2002	-6.64071	-4.18784	2.23892	-1.67777	7.09653	3.30951	3.71364	-0.428658	2.74446	6.85156	1.94086	-8.51293	4.70353	-3.82461	-6.56685	-1.21151	-4.98905	-0.222266	-3.79373	-4.23567	0.427854	-6.20034	-0.798632	1.90699	-2.31186	1.65956	-3.539	-18.9995	-20.2409	-22.6805	-20.8934	-32.3912	-16.4974	-16.7229
BLCA__TCGA-E7-A7DV	5.4651	-16.0315	-10.1647	-11.2044	-5.50433	-5.61628	-6.37502	-6.011	-7.49521	-5.46531	-12.3894	-10.5017	-8.66454	-9.2202	-7.54669	-5.33536	-5.9215	1.14367	-5.3958	-5.32023	0.285552	-5.21837	-10.7795	-0.76954	0.678468	0.748439	-18.0235	-5.89081	-16.0298	-12.8919	-13.6056	-9.88837	-4.73755	-4.73206	-5.57662	5.03735	-5.7835	-4.2501	-5.35646	-3.63988	-2.79811	0.212728	4.17013	4.10742	5.09695	4.92823	5.29972	7.25683	4.69772
BLCA__TCGA-E7-A7PW	-39.4675	-2.18139	0.353171	1.73486	9.91327	13.8787	9.32272	7.62095	7.98672	6.65909	1.57702	3.75419	8.14676	3.69954	20.0677	-4.67623	-2.16992	4.51889	3.2374	13.3837	8.78997	6.02875	-0.727328	4.98848	8.2267	2.75011	-9.91037	7.25778	-8.78669	-9.3878	-5.26693	-2.50337	0.355049	0.00261416	0.611586	1.49906	-5.1771	-0.994135	2.00731	-2.02731	3.33624	-2.61722	-20.0005	-19.8604	-26.6323	-19.3408	-31.6035	-15.5212	-14.4176
BLCA__TCGA-E7-A7XN	-21.6604	-8.4182	-4.64912	-2.12687	2.01378	-4.52796	-4.93627	6.12136	2.22535	1.09782	-9.04628	-4.91862	-1.00109	-3.93104	2.16798	-2.27506	-1.95986	-9.58882	-7.26809	-6.72934	0.00443071	-8.32665	-8.73116	-0.218198	6.97314	2.88071	-25.0074	-6.14516	-10.0917	-11.7234	-2.50614	-5.06956	0.378317	-6.44583	-7.84359	5.24636	0.20394	0.303788	0.472597	-0.448284	0.167785	0.0298136	-9.98378	-15.1247	-20.2673	-25.8506	-30.8113	6.64665	-6.84238
BLCA__TCGA-E7-A85H	-23.3811	0.350417	3.40514	2.01592	9.31158	10.5738	7.4283	6.25603	4.15526	5.62552	0.772084	4.22805	11.1565	2.71687	16.7251	-3.213	-1.68953	-1.13521	0.266994	5.14015	12.3668	-5.41865	0.196434	3.82806	13.534	8.3072	-1.93416	5.66854	-0.535415	-1.95048	-1.31851	-1.01478	-0.884326	-1.79869	0.0914909	1.18383	-4.07886	-1.52672	0.606905	-1.87882	3.24959	-2.66858	-11.0928	-11.4846	-17.4672	-11.6385	-18.1244	-10.3475	-8.67837
BLCA__TCGA-E7-A8O7	-9.11369	4.54418	6.17875	2.24879	3.5739	9.67287	8.01757	0.584064	1.12611	3.38069	-0.0610887	6.83978	-5.16112	6.52375	-3.7521	4.24528	7.32445	3.34352	-0.480036	-3.71174	-8.95187	-0.420108	0.0578842	-8.32148	-2.87514	-6.02795	-0.111155	0.0897679	5.56497	3.80801	4.89309	7.11253	8.37452	-1.48363	-3.63023	7.99636	5.38611	6.65344	8.76375	5.19631	2.66184	6.65912	-15.1416	-4.77833	-23.9916	-3.13677	-7.23929	-0.492363	-4.7207
BLCA__TCGA-E7-A8O8	-40.9296	-0.401962	2.2612	2.02532	10.5721	13.1706	8.81495	6.78199	5.71637	7.04999	1.26088	4.53336	4.30495	3.1132	9.15171	-2.70062	-0.116033	2.75856	2.67235	10.8161	6.97586	-0.468797	-1.50847	2.68963	7.95593	2.45948	-5.63728	5.7042	-2.41847	-4.69812	-2.15599	-1.11084	1.75011	0.716346	-5.24385e-05	4.40654	-3.29973	1.4375	4.14508	1.67424	6.31249	0.849918	-17.6778	-17.5158	-22.6355	-17.1375	-26.5453	-11.7473	-13.9914
BLCA__TCGA-E7-A97P	-15.368	4.90089	6.62693	6.32897	-1.37793	-4.2081	-4.69362	5.54434	5.33415	6.67456	5.37283	7.08363	-0.746324	6.02244	1.50056	-0.949795	1.07146	-5.8433	-8.84226	-8.74511	-9.43413	-5.70939	-6.44363	-7.29481	2.47217	5.22262	4.67787	-0.00863492	7.28006	5.59588	7.1693	0.303463	-6.43675	-10.1897	-11.5354	3.06401	-0.939118	-7.00048	-7.16051	-5.50313	-5.90346	-6.03406	-3.1592	-2.64326	3.20779	-3.25733	3.99146	-0.380827	-2.72708
BLCA__TCGA-E7-A97Q	-22.9451	0.325216	3.00532	2.81688	6.55159	9.3192	6.73794	2.73765	3.43578	3.58917	1.48211	4.39713	0.282464	4.80718	0.830936	-1.77212	1.96916	2.48475	-1.91546	-2.04308	-3.31555	-0.536196	-0.412111	-6.65387	0.542661	-1.24068	-4.99321	0.519399	-1.01632	-3.86007	-1.59148	3.55052	2.31069	-2.23315	-3.1585	2.76434	-1.142	1.09264	2.80213	0.310417	2.37495	-0.598144	-9.65673	-11.5043	-11.6996	-11.3422	-19.6544	-10.7176	-7.94065
BLCA__TCGA-FD-A3B3	3.1782	4.61443	6.23198	6.79418	-6.27554	-5.96729	-6.53179	2.91704	-2.46872	0.975777	5.46926	7.41552	-0.0260539	-6.49314	2.23197	5.98373	7.97544	-6.86661	7.36475	0.704086	1.93428	-6.92448	-2.7481	1.22705	2.65616	2.64362	4.60211	0.640008	5.90789	5.04493	5.99104	7.83073	1.07049	1.43511	1.40197	1.33498	7.03305	7.84179	1.10284	0.316045	0.887384	0.233741	4.74181	5.09784	5.12471	6.17917	5.88153	8.8593	6.22687
BLCA__TCGA-FD-A3B4	-14.4737	1.8041	6.58476	0.0835225	-0.0646798	4.87989	3.01738	-2.66753	-3.10202	0.784139	5.07251	3.99589	-9.88022	3.43966	-8.7389	6.98632	10.0293	5.03	6.97844	6.86305	1.6369	-7.66439	-2.56233	-8.87828	-7.12258	-5.95256	4.12648	-1.18433	5.95306	4.46774	-1.18153	9.99181	7.79975	6.75684	5.61968	9.74507	8.0559	8.04308	7.75471	6.80749	6.33197	6.5783	-4.37561	-2.39009	-3.05813	4.74011	5.16691	7.91596	-2.92859
BLCA__TCGA-FD-A3B5	-13.8355	-2.97539	-0.650976	-1.10575	2.50023	6.10727	3.33579	-0.308778	0.10011	0.2173	0.891815	1.90018	2.06698	3.40715	5.98294	-2.74023	-1.0028	9.23948	0.170047	7.53831	3.11162	11.26	-3.09407	-0.587954	0.858559	-1.08152	-9.40952	-0.875181	-10.5139	-10.9057	-6.12779	-2.08292	-1.74073	-1.07487	-3.47625	1.25221	-3.27067	-2.01877	-0.604237	-0.713584	0.173379	-1.20818	-7.96827	-10.3528	-12.3357	-10.5306	-17.6136	-5.22511	-9.45882
BLCA__TCGA-FD-A3B6	2.46133	4.34542	4.97385	6.2496	6.17953	-4.01539	-4.29103	7.07634	6.14044	6.96843	-6.44609	-3.9864	5.9785	-6.13081	4.85602	3.25172	5.19126	-6.74897	-6.04259	-0.128866	2.35536	-6.22227	-7.43934	0.921707	9.68986	6.22942	-20.7624	0.378461	5.06201	4.09089	4.19404	-3.95206	0.651552	-4.6555	3.59672	5.97438	-0.176798	4.70297	0.404004	0.710543	0.745977	0.294113	-3.7189	3.58147	3.13568	4.12704	4.23459	6.85998	-3.356
BLCA__TCGA-FD-A3B7	-4.93644	5.79171	7.39667	7.40289	1.80518	0.470634	0.382981	8.00872	1.52452	8.50411	5.40858	8.42537	-1.37151	-3.33746	0.370254	-1.73108	-1.46174	-2.4851	-2.29256	-0.991997	0.0222524	-6.66948	-0.601593	0.60982	1.97972	1.48747	5.91975	0.940723	6.82719	5.52482	6.77727	-3.17913	-0.535688	-0.687672	-0.25461	-0.283112	-1.84899	-0.616845	-0.620518	-0.686178	-0.570733	-0.453921	4.50709	4.33065	4.33974	5.25938	4.85501	7.54491	5.21705
BLCA__TCGA-FD-A3B8	-7.66031	5.33778	7.80753	-2.34135	-0.408804	-0.997815	-1.10648	-0.533797	-0.499462	-1.40882	-7.58014	-3.50149	-4.20392	-3.77982	-9.47682	-1.37129	-0.495382	-2.77945	-2.50202	-1.9613	-2.00329	-1.26378	-2.0509	-1.39626	-1.10111	-2.76624	6.29702	-2.65971	6.55327	5.91292	6.948	-2.09652	1.66775	-0.170823	-1.6009	2.15343	-0.148972	1.27888	1.47799	1.53354	1.04637	2.07657	-4.73787	-8.33656	5.33441	6.39199	5.74928	-0.894827	-4.85783
BLCA__TCGA-FD-A3N5	-13.9425	1.3649	2.89359	3.10536	3.69113	8.26869	6.01761	1.34057	1.81813	3.75791	6.32749	5.05185	9.5137	4.73872	12.8035	-2.13791	-0.523414	5.4587	-0.931067	-2.01224	-2.16443	-6.39772	-0.83158	-6.35108	0.386784	6.07045	-4.57388	1.59214	1.6129	-0.531274	0.526053	-0.702251	-1.3954	-3.01145	-3.7465	1.41821	-3.56461	-2.23551	-2.27185	-2.39467	-3.52785	-3.27759	-4.66133	-4.81699	-8.55305	-4.59927	-7.2145	-1.29107	-4.05138
BLCA__TCGA-FD-A3N6	-26.8111	0.161772	3.28271	0.917657	3.04021	6.03106	4.19531	0.527912	1.74447	2.52807	5.34373	3.61514	-0.888048	4.18405	13.164	-1.33492	1.76114	2.86269	-1.23743	2.18761	-1.0392	-5.17143	-2.87009	-8.1305	12.4965	6.75445	-3.93426	-0.951867	0.470026	-1.04537	-0.399738	0.929437	0.935595	-1.71941	-3.72932	3.13759	-0.724419	0.341751	1.91547	0.109412	1.46292	-1.13201	-8.65957	-8.18791	-11.7807	-7.3138	-13.6682	-0.745377	-6.48181
BLCA__TCGA-FD-A3NA	-4.41918	1.18489	2.50103	2.20989	1.68318	7.05495	5.5025	-0.593411	-0.174389	2.97527	6.1105	4.97874	-1.14312	4.5484	-0.195115	-3.21556	0.615348	6.11517	-0.747021	-2.59054	-2.8583	-1.02206	-0.606099	-6.91874	-0.163198	-2.58558	-0.613237	0.665832	0.768269	-0.909241	0.0580718	-0.434481	-2.13341	-3.24973	-4.69988	2.65883	-2.98492	-2.48739	-2.05747	-1.23686	-1.14067	-2.69376	-3.96027	-2.6113	-2.3337	-1.2811	-2.90197	1.73288	-3.16475
BLCA__TCGA-FD-A3SJ	-29.616	0.200246	0.886972	3.19769	9.45737	12.7295	9.22754	4.04038	5.20105	5.2592	7.07402	4.74495	14.4352	4.18413	20.0287	-0.148705	-0.713182	8.88936	2.24142	10.8807	7.24967	8.93742	2.26532	6.61396	6.40453	2.19324	-5.80894	8.0864	-8.61794	-7.71569	-4.24717	0.775649	0.692375	1.62779	1.07411	1.87793	-1.92032	0.447572	2.40818	-1.36686	2.86905	-1.79365	-16.5194	-14.2712	-19.3343	-15.8766	-25.7014	-11.8962	-13.4986
BLCA__TCGA-FD-A3SL	3.15587	0.66584	2.43689	-0.849155	-0.522305	4.76195	2.66503	-8.78289	-8.20135	-0.250532	0.952024	4.4839	-4.17402	3.42628	-3.75576	-2.09796	0.829352	3.56344	-2.30449	-5.37204	-3.76043	-7.98966	-1.28761	-8.85213	-9.16432	-8.10004	1.68429	0.908	-1.57666	-1.36888	-1.37704	4.37522	-3.28737	-8.10605	-5.32137	1.57471	-1.38941	-3.15564	-2.67555	-2.39104	-3.12523	-3.13612	-3.32404	-2.11714	5.06584	-0.700136	5.53421	1.91856	-2.92311
BLCA__TCGA-FD-A3SM	-6.6665	-3.67214	-1.52736	-2.26306	1.53166	4.30948	1.71241	-1.93993	-1.07236	-0.956781	-0.93684	0.244587	1.33209	2.64476	3.69645	-3.69877	-1.52224	10.4104	0.43216	8.1045	3.04206	16.8705	-1.52561	0.560963	-0.955533	-3.76567	-7.63945	0.0117375	-9.06397	-9.55765	-6.30667	-3.73457	-1.02663	-1.88261	-4.15637	0.426063	-4.48148	-1.68678	-0.716186	1.14464	1.74081	0.00123599	-9.79201	-12.9455	-11.101	-14.2289	-21.7415	-10.1453	-9.62619
BLCA__TCGA-FD-A3SN	-6.9558	-2.13417	0.859544	1.11641	3.78694	3.68457	2.32291	2.786	0.0578312	1.99891	-0.141059	0.919444	-1.53753	1.2269	1.27103	-2.44823	-0.791126	3.20616	-2.94702	1.37186	0.778702	0.621111	-2.39534	-6.71502	2.25937	-1.05578	-3.5333	0.4551	-1.25319	-3.39607	-2.0208	-0.370137	-2.28787	-3.47516	-2.8825	1.50999	-3.2992	-2.61707	-1.22867	-0.0888994	1.89017	-2.06701	-5.40957	-7.76356	-8.30039	-8.91128	-12.9135	-5.62206	-7.39178
BLCA__TCGA-FD-A3SO	2.63821	0.220621	1.77617	1.25219	0.796427	-3.42385	3.24617	-0.951149	-0.969148	1.78043	5.08257	3.37716	6.26371	5.54293	7.98463	4.20157	5.93337	-4.35299	5.24404	5.58035	5.35398	-4.21192	-6.78553	-7.1433	1.95097	1.08181	-0.0832956	-5.58636	4.17966	0.403608	-1.48511	5.67954	-4.10109	3.59294	3.87684	6.51412	1.26172	0.624783	-4.67713	1.43347	-4.07907	-0.000756107	4.47376	4.54263	3.7721	4.42848	4.55393	6.80615	4.73039
BLCA__TCGA-FD-A3SP	-0.668199	4.54262	6.39151	0.688926	-6.39642	-5.04503	-5.17485	-7.51476	-7.49216	6.2077	4.70487	7.17454	-10.1415	2.12621	-11.1844	-1.08596	0.256517	-1.68805	-7.04528	-8.4046	-8.02322	-6.07884	-1.29446	-5.70712	-7.50479	-6.59791	5.89325	-6.05605	5.83398	4.39728	4.99774	1.83679	-8.26034	-9.22759	-10.7944	-5.32876	-8.40943	-7.86985	-8.17342	-6.50135	-6.64979	-6.8331	5.80925	5.65667	6.11468	7.12938	7.15789	10.2219	7.14471
BLCA__TCGA-FD-A3SQ	2.42661	1.97236	3.80389	-0.0266282	1.26522	6.27476	4.70011	-2.21402	-8.35141	1.55545	-3.64495	5.63931	-19.3471	4.36255	-18.0986	5.95482	9.66749	4.20331	-3.87235	-12.7116	-14.3953	-5.42857	-3.92618	-15.4517	-16.0246	-15.0905	1.35719	-5.22626	3.14459	0.56791	1.41676	9.87127	7.96776	-6.62481	-11.449	9.31197	7.54139	7.53311	7.61903	5.8881	5.10543	8.16672	-4.68704	-1.2842	4.53518	5.30687	6.00182	2.85202	-3.41756
BLCA__TCGA-FD-A3SR	1.72634	4.14725	5.16833	4.58339	1.62082	3.39566	5.28946	-0.771301	3.85051	3.84042	4.42501	5.01885	-3.05486	5.05502	-3.714	4.22965	6.28566	7.38322	-0.124986	-5.98	-5.74846	1.44245	3.37077	-6.35537	-5.82046	-5.60581	3.19833	0.67182	1.67456	3.53319	4.0972	3.48801	-0.731615	-2.06501	-4.21016	5.55167	1.26967	0.411379	-0.0495876	-0.697866	-1.48217	-0.837647	-2.23183	-0.732765	-2.72847	-0.750333	-3.98746	1.54393	-1.23094
BLCA__TCGA-FD-A3SS	-22.784	-5.38296	-2.28915	-3.42847	3.6877	6.22781	2.40461	0.595566	0.899758	-0.621483	0.225552	-1.47768	6.19995	1.57797	10.3119	-6.37261	-5.48915	10.012	1.10403	11.9464	8.93127	12.88	-3.33049	1.14354	6.03622	0.45462	-12.3765	1.83871	-11.284	-12.1381	-9.32921	-5.61192	-0.420319	-0.546416	0.101176	-0.318199	-8.04309	-2.6695	-0.161943	-1.1563	0.387743	-2.83585	-12.4421	-15.2562	-20.88	-17.0612	-29.7313	-13.2177	-13.0873
BLCA__TCGA-FD-A43N	-14.3149	0.068848	3.58019	1.7588	5.26088	9.21544	6.40808	2.58772	1.9441	4.00106	5.61383	5.06655	-1.16492	4.69346	-0.804557	-0.550831	1.58625	3.62728	-0.441306	2.10907	-0.316061	-0.248408	0.569044	-5.36883	2.52173	0.254028	-3.10319	2.86414	-1.58773	-2.85519	-0.809382	1.37934	-0.13781	-1.13602	-3.64462	1.05581	-1.43554	-1.24817	0.935072	-0.837875	1.08985	-2.14776	-7.77825	-9.26252	-7.11706	-7.30823	-15.6562	-8.03731	-7.17056
BLCA__TCGA-FD-A43P	-22.9783	5.9799	7.00312	7.87201	8.14994	10.2796	9.42715	7.61658	7.05812	9.17786	6.08849	9.29604	6.76797	6.30748	4.03921	3.78828	-1.20822	-6.21507	5.30437	0.635142	2.12243	-5.78496	6.61552	2.86779	7.76262	5.41856	4.08786	9.23727	5.22307	4.64511	5.17943	-3.40709	-5.45946	0.432201	4.39766	-3.86456	-0.227421	-5.21423	-5.35383	-5.01478	-4.58881	-5.78657	-14.7877	-15.2762	-25.2283	-17.2423	-24.4149	-8.38506	3.84364
BLCA__TCGA-FD-A43S	-20.6146	5.18869	8.50737	5.30808	6.09562	9.34913	8.346	5.4587	-6.44559	7.09086	5.17141	9.34879	-19.0091	6.3718	-16.1929	6.05247	8.45528	-8.00189	-8.2162	-10.8722	-12.1212	-6.72541	-2.4417	-11.3645	-10.3657	-8.29064	6.47475	-1.00921	7.51264	5.34891	6.46569	9.21916	7.37754	-0.153259	-8.86322	8.37854	6.39985	6.46495	2.48261	6.51236	7.94831	6.58304	-4.85193	2.19542	2.88229	4.18953	4.99051	4.10789	3.06619
BLCA__TCGA-FD-A43U	2.50035	4.01307	6.08493	1.61596	4.86294	5.07335	5.86199	3.99505	-4.68908	5.20647	4.74789	6.94727	-10.8154	5.07986	-10.4349	3.58731	5.35536	0.712985	-0.447707	-6.36116	-6.79971	-7.96382	-6.6016	-7.39969	-6.25774	-5.26524	5.42963	-0.0665672	5.94086	3.99745	3.59318	6.01582	-4.14092	-5.65404	-5.66634	1.96255	0.42443	-0.36278	-4.42395	-0.107992	4.30152	-4.10998	3.34677	3.57701	3.68227	5.32594	5.90579	7.29559	4.7161
BLCA__TCGA-FD-A43X	-42.2576	-3.27957	-0.623312	0.617117	9.60585	13.9553	9.4236	6.02199	5.53373	4.67873	-0.557194	2.50592	3.44335	3.71177	7.8839	-5.01844	-1.60002	4.55713	-2.73464	7.78003	4.058	11.1609	-1.13788	1.24801	4.82115	-0.458417	-10.8077	3.79868	-7.71083	-9.82062	-4.07618	-2.88241	3.15682	-2.74665	-3.58491	4.24045	-3.97111	2.28685	5.54252	0.69989	4.43815	0.150729	-22.5533	-22.0346	-24.7344	-21.1462	-34.8879	-15.879	-18.3582
BLCA__TCGA-FD-A43Y	-11.6736	-1.2716	1.93449	0.390401	1.26879	5.3586	3.56656	-1.4198	-2.84883	1.85189	1.57313	3.24727	-1.67322	3.40803	0.0686332	-2.90415	-1.0781	2.39341	-1.39228	-2.04523	-3.07446	-2.06764	-2.37785	-7.16713	-1.81899	-2.56126	-1.18475	0.196383	-1.32332	-3.4993	-2.97304	-1.6095	-4.12942	-5.04653	-4.88168	1.75988	-3.0711	-3.26387	-4.43705	-2.00348	-0.906606	-3.93607	-2.9644	-3.7301	-3.7265	-1.50624	4.75757	1.5308	-2.85238
BLCA__TCGA-FD-A5BR	-13.4896	5.82835	8.72256	1.55019	2.47787	7.60602	5.9049	-1.79488	-1.46174	2.37976	6.2507	10.6118	-4.16236	4.43578	-3.62462	6.07699	8.29072	2.72055	0.898859	-4.86911	-0.484581	-5.96101	-0.597041	-5.91455	-5.17425	-1.64916	4.54322	1.52899	6.68821	4.59174	5.3167	9.08693	5.11205	4.23435	-0.459484	8.19156	6.57537	5.29172	5.85998	5.41928	5.76804	4.57729	-5.98991	-2.83879	-1.22281	5.17638	4.90394	0.290914	-3.29453
BLCA__TCGA-FD-A5BS	-7.12094	-5.08728	6.49727	-2.72191	0.820922	0.0411996	-0.0664214	2.10442	-1.7405	1.35297	-4.92992	-0.317679	-11.3361	-3.40447	-11.0805	-1.01264	0.471881	-10.0788	-3.00215	-3.1156	-2.76246	-8.82875	-5.07992	-6.91246	-1.66333	-2.02838	6.54454	-2.98797	6.4311	5.71572	6.36847	-1.45146	1.08907	-1.35668	-1.79804	3.42205	-0.377091	0.970428	0.938418	2.44039	2.83377	2.2571	-4.17866	-4.69047	3.96579	5.04939	5.08534	1.04601	-0.698511
BLCA__TCGA-FD-A5BT	-1.48004	3.44245	6.02981	-5.32312	-2.70276	-2.77349	-3.17978	4.57704	-4.96465	4.82152	4.13311	6.02941	-10.0389	-4.97954	-9.08511	3.12665	4.81348	-8.39405	-5.25678	-5.83606	-6.04419	-9.32918	-5.49616	-5.77219	-0.895267	-0.777797	5.83922	1.78551	6.30908	4.37343	3.95408	5.83309	-3.30455	-5.02556	-5.17565	4.09861	-4.04252	-3.36333	-3.65938	0.162778	0.688117	-0.135262	2.45617	3.07011	3.96676	4.42959	5.45103	5.46614	3.88227
BLCA__TCGA-FD-A5BU	3.2679	1.29188	2.67575	1.27701	1.30783	5.69022	3.90351	-1.43469	-6.60858	1.92685	5.14794	4.78615	-1.26444	3.85486	-0.949919	5.24879	7.34647	6.61868	5.73055	0.0523794	0.722491	-3.64274	-1.69247	-7.51352	-6.60141	-3.81	4.30136	-0.116636	5.19495	3.58598	0.38104	7.47879	7.04869	5.20956	4.43373	7.72486	5.88214	6.54516	1.22458	5.99282	1.77118	5.53812	-3.97719	-1.99013	4.41084	5.45101	5.53982	7.90983	-4.16011
BLCA__TCGA-FD-A5BV	-30.1373	-1.02938	0.625175	0.139856	7.13795	11.3157	6.96447	3.95176	4.72089	3.77398	0.0295681	3.35422	5.26559	2.22434	10.357	-9.13578	-6.50476	5.98917	-1.43924	9.23509	5.82035	9.01122	-0.254677	5.88092	7.44682	3.25119	-8.52936	5.0086	-7.46754	-9.68946	-5.2275	-6.37558	-3.67282	-4.22508	-2.24547	-2.63778	-8.28438	-5.42722	-3.39839	-4.79781	-0.793715	-6.39402	-14.5558	-18.0397	-21.8916	-19.3928	-32.1524	-14.9167	-15.7108
BLCA__TCGA-FD-A5BX	3.33997	-4.71871	-0.0572981	-3.03951	-4.18219	1.44868	0.107212	-1.81963	-8.49714	-0.0883982	-3.91066	-0.854531	-12.3423	-1.34674	-10.2129	-3.05449	-1.03467	0.867618	-6.04987	-9.19967	-8.91179	-5.92085	-8.64743	-7.32341	-4.06748	-0.416199	5.07185	-0.480281	-0.615244	-1.34608	-1.45752	-1.81766	-6.99085	-10.1141	-8.94059	-0.276545	-3.57981	-6.32833	-6.85476	-5.90495	-4.26991	-6.07936	-2.85484	4.48012	4.91732	5.14827	6.12256	6.92014	-0.834228
BLCA__TCGA-FD-A5BY	-14.1994	-1.68105	-0.0442752	-0.200678	2.73115	4.40819	2.36754	0.674238	-1.43853	0.787467	0.907147	2.47853	-0.430685	1.99142	11.5122	-1.59848	0.201923	5.99615	1.31459	2.74208	0.727386	0.914033	-1.81935	-0.467298	1.52238	-0.922236	-1.7596	1.36419	-1.41935	-3.68279	-2.36897	-0.648935	-2.76344	-1.74622	-3.88936	1.92494	-2.68406	-2.48952	-2.54903	-2.02322	0.588492	-4.07066	-5.1561	-7.78401	-8.85162	-7.30992	-9.81005	-2.7818	-7.54569
BLCA__TCGA-FD-A5BZ	-12.7551	-0.667398	2.87417	0.357122	4.92443	10.7747	7.94748	-0.960714	-1.79301	2.14249	0.396956	5.85423	-2.75485	4.75592	-2.17659	-1.08406	1.78877	8.90326	-0.29977	1.98124	-1.23202	3.47898	-0.808418	-9.06064	-4.09181	-4.91227	-4.23361	1.91181	-5.41071	-7.58061	-4.37737	2.12415	-2.71272	-5.348	-6.89565	2.08137	-1.35293	-1.95281	-3.01452	-1.58189	-2.55193	-3.30997	-7.21458	-7.20821	-4.68417	-8.96681	-10.8807	-6.80141	-7.08076
BLCA__TCGA-FD-A5C0	-11.8198	0.394834	1.4449	0.694926	3.95903	5.87396	4.06108	0.98109	1.17748	1.79501	5.45593	4.69003	0.158678	4.17452	2.99588	0.297529	1.56514	5.59139	0.870825	4.9254	2.80609	5.14627	-0.323982	0.139814	0.21683	-2.05776	-5.19528	1.64232	-2.87604	-3.52394	-2.98311	1.42652	-1.51947	-0.745596	-3.8209	1.45345	-1.85958	-1.8721	0.0796701	-1.32127	0.548862	-3.39078	-4.96146	-7.02795	-9.57291	-9.36424	-16.2148	-7.98105	-5.02161
BLCA__TCGA-FD-A5C1	2.929	3.19612	5.71955	1.00654	-0.327514	-2.93063	-3.28362	5.09662	-5.46944	4.91437	3.67918	5.17336	-9.95142	-5.74297	-9.37819	0.616692	5.40152	-6.88683	-7.71506	-6.71651	-6.89006	-7.37314	-8.25895	-7.46215	1.32257	4.17751	4.55921	-4.88842	5.36208	3.75454	0.426593	3.36917	-5.80183	-7.34825	-8.00917	2.03719	-1.26523	-6.40703	-6.98108	-4.37509	-4.97975	-4.91138	4.12659	4.94282	4.86644	5.88402	5.81142	8.38808	5.77522
BLCA__TCGA-FD-A62N	-9.36985	-4.7233	7.69284	-1.78664	1.73044	1.17149	0.630966	2.95151	-0.832127	1.7037	-4.71705	-0.206493	-5.35203	-2.76053	-3.73726	-0.814684	0.434805	-9.6457	-3.18449	-3.41624	-2.59687	-8.6932	-3.40836	-1.95149	-0.425167	-1.39814	6.59731	-1.25826	6.27843	5.94445	-1.18111	-1.43521	1.54424	-0.975574	-1.67548	3.77806	-0.380338	1.1748	1.18045	2.32542	2.53032	2.30013	-6.56161	-5.75413	-6.11799	-8.68459	-9.94284	-0.155193	-2.00712
BLCA__TCGA-FD-A62O	-24.4829	-1.30961	0.819121	1.0135	6.95348	10.8949	7.49194	3.32773	4.97423	3.29132	0.292972	3.35018	3.96206	3.71156	8.04296	-2.89999	-0.633494	7.8772	0.0579958	7.11557	5.0505	9.94028	-0.64036	0.702616	4.5236	-0.464295	-8.78614	2.56879	-6.14493	-8.07192	-5.08977	-0.899649	1.25547	-0.501823	-2.46742	1.68141	-3.36078	0.0857506	2.28976	-0.992431	0.976407	-1.7803	-14.6933	-18.1861	-16.7415	-16.3564	-27.1956	-12.8036	-16.1418
BLCA__TCGA-FD-A62P	-9.6992	1.04636	3.67728	0.550892	1.1047	4.90975	3.39166	-1.13268	-2.76831	1.19985	1.33593	5.14038	-2.34228	3.27903	-1.68651	5.51633	8.17448	5.19168	0.824683	-0.660938	-2.12996	-5.20403	-2.37481	-8.53601	-7.0328	-5.99322	4.12648	-0.471097	5.90107	3.54871	0.107869	4.55512	-0.828104	-1.60619	-4.69076	2.9659	0.028028	-0.256228	-0.56932	1.03858	-1.01049	0.0192314	-3.3053	-1.88329	-2.84872	-2.73615	5.56297	1.80016	-3.99351
BLCA__TCGA-FD-A62S	-14.6165	1.59276	6.31071	0.360624	-0.188004	-4.9114	1.60648	-2.29926	-7.56863	1.39246	5.42128	4.06726	-8.70199	3.12118	-8.73426	5.75802	7.74886	-7.23695	0.472197	-0.393811	-7.07613	-6.9312	-1.78056	-6.62628	-6.46234	-5.11817	4.78941	-0.609098	5.73963	4.19297	-0.565081	7.7633	-5.22456	5.44299	-4.48947	7.68805	0.820052	1.01085	-5.48943	1.2078	-5.59722	-5.68991	5.67157	5.47715	4.80789	6.06901	6.40006	9.27832	-5.1182
BLCA__TCGA-FD-A6TA	-7.75918	4.8463	7.26051	1.83795	2.0806	6.59848	5.27436	-1.35861	-0.819602	2.20893	6.38958	8.88728	-1.11722	7.35081	-1.66233	5.92098	8.7636	5.13344	1.2848	-4.27295	-0.409281	-6.54911	-0.26905	-6.26485	-6.91663	-5.79009	4.55482	1.06094	5.81591	3.86924	-1.05664	8.96953	5.58235	4.50352	-2.73484	8.43638	6.5548	6.32919	5.81296	6.27548	5.00803	5.28161	-5.95728	-3.48114	3.31172	-2.39229	4.98189	-0.0900372	-5.03367
BLCA__TCGA-FD-A6TB	-7.1105	5.39978	8.13306	6.52881	8.5874	10.5498	9.56367	6.26561	-6.75731	8.11471	5.70256	9.23805	-10.7186	6.44718	-10.521	8.03255	10.3446	-5.57537	7.68647	-1.06536	-1.03118	-6.24659	-1.73572	-7.66532	-7.84706	-7.7071	5.62212	-6.3496	6.73259	5.50123	5.56322	10.4567	2.02371	1.15567	0.264158	11.6826	9.23496	9.37092	2.07752	8.76553	3.00008	1.97274	-6.3159	4.03849	4.03656	5.39076	5.04199	7.3202	5.76141
BLCA__TCGA-FD-A6TC	-5.48134	-5.0147	-0.508819	-2.32838	4.05854	6.31586	2.81175	0.765445	-0.498833	0.211825	-0.75263	0.393628	3.60659	2.23132	5.92661	-3.63006	-2.43671	8.68489	2.66479	10.202	5.60537	13.3667	-0.845634	1.55865	1.87667	-0.102744	-7.90029	2.75869	-7.66568	-9.50948	-7.44936	-3.95893	-2.70236	-0.813313	-2.16826	-0.564501	-6.08008	-4.23445	-1.81307	-3.54953	-0.151807	-5.086	-8.58134	-11.4918	-9.49953	-14.2447	-19.8916	-10.6386	-11.7419
BLCA__TCGA-FD-A6TD	2.91536	0.523546	2.07598	0.865545	-0.320307	-3.6803	-4.18427	-1.08	-5.18491	1.39446	4.66562	3.50109	-8.60486	2.12908	-7.3967	4.85555	6.89431	4.07717	-0.822771	-5.79254	1.31084	-4.84955	-7.56684	-6.02973	1.9165	4.93888	4.18775	-0.186331	5.02575	3.68986	0.611617	7.22131	-4.17137	4.14411	-3.31983	6.06798	1.02209	0.721253	-4.516	0.827583	4.63935	-4.87454	4.19785	4.96	4.65823	5.69435	5.74464	8.45211	6.10099
BLCA__TCGA-FD-A6TE	-19.389	1.20828	0.433726	1.96573	5.20276	6.10944	4.0519	3.21271	5.11446	3.38983	5.6772	4.14133	12.4434	4.3181	19.0061	-4.97276	-2.15992	5.78438	0.292962	7.27911	11.8076	7.73966	-0.061078	4.07303	12.3288	7.01027	-33.4082	1.83476	-4.44075	-4.63287	-1.75009	-3.81382	-1.47713	-0.650949	-0.32693	-1.2102	-5.75749	-4.00915	-0.587814	-3.07213	1.37335	-4.16284	-12.1039	-14.2568	-19.602	-15.8032	-29.6033	-10.9638	-11.4646
BLCA__TCGA-FD-A6TF	-11.4731	-0.5521	2.87528	-0.967964	3.60878	7.81164	5.39775	-0.329164	-3.65397	2.07576	2.00727	6.07725	-2.17252	2.72593	-1.19708	1.37448	2.46342	11.011	-0.616369	2.56267	1.35521	4.52707	-1.20911	-7.75327	-0.939468	-1.2134	-2.98032	2.56315	-2.35509	-4.79319	-4.96865	2.98367	-4.5633	-2.21975	-1.87922	1.27678	-1.8781	-2.82769	-3.92231	-1.93579	-1.03086	-4.23277	-2.99099	-2.74269	-2.37019	-2.6586	-4.20368	-2.91585	-4.54484
BLCA__TCGA-FD-A6TG	-13.6184	2.41872	5.36649	1.20991	1.59718	8.39669	5.87663	-3.1361	-3.3377	2.28225	1.92521	6.76726	-3.04543	5.39308	-3.66287	1.8731	8.55951	7.82105	-0.779353	-3.21115	-2.75488	-5.21419	-1.42192	-8.67425	-8.2898	-6.58155	2.61885	1.47712	3.65738	1.38562	-1.26125	9.398	-0.721814	-3.15079	-4.8766	3.23505	0.483029	-0.542755	-1.25762	0.497418	-1.8146	-0.285052	-5.50189	-3.37308	-3.28546	-4.48417	-6.6536	-0.01542	-3.99238
BLCA__TCGA-FD-A6TH	2.84976	-1.35149	0.996478	1.4329	3.27138	4.50224	2.56872	3.2788	0.335149	2.40154	5.42392	1.92476	8.17346	2.00183	1.74439	-0.211797	0.942642	4.17278	-3.12842	0.491585	0.103848	-2.29009	-0.859345	-5.76224	1.54725	3.92621	-2.47517	1.15233	-2.98114	-3.80554	-3.89108	2.15586	0.748558	0.791642	-1.81655	2.16162	-1.13283	0.189206	0.931555	1.15591	2.85622	1.18668	-4.11551	-2.67539	-3.34537	-8.13168	-10.2168	-4.94742	-5.94806
BLCA__TCGA-FD-A6TI	-5.88195	-1.56764	0.184335	-3.77478	-0.655134	4.47468	2.39241	-3.778	-3.98737	-1.42975	-2.42335	3.60665	-10.6656	2.45743	-6.85854	-4.70478	-1.78747	2.7095	-8.29897	-5.49545	-5.77825	0.80063	-5.70468	-12.9197	-10.1009	-5.85662	-2.87032	-4.18178	-2.90879	-5.07466	-1.96119	-1.17038	0.511953	-9.07036	-8.911	1.87809	-3.11969	-2.09138	0.383181	0.467787	2.4384	1.42842	-4.51109	-4.88527	-3.59199	-5.77956	-11.4411	-4.12868	-2.4607
BLCA__TCGA-FD-A6TK	-13.9491	4.36618	7.2938	0.629308	1.75569	-4.12033	-4.52642	-1.23602	-6.27975	7.06219	5.53313	6.82761	-0.769603	5.62092	-8.02726	-2.18559	2.48605	-7.18335	-8.95496	-9.03653	-8.56891	-8.31123	-2.55859	-7.38499	2.12036	2.03371	4.88727	-0.13669	6.10125	4.46503	4.4366	6.95303	-5.78862	-9.41279	-7.80295	-0.561789	-1.31922	-6.5808	-6.48744	-4.4618	-5.45565	-5.1188	-4.89862	4.70162	4.49329	4.55177	5.12813	6.66323	-3.64287
BLCA__TCGA-FJ-A3Z7	-25.8763	-0.0609716	2.93426	-0.107472	3.55065	9.01081	5.13629	-0.0230774	1.2535	2.08812	-1.80087	4.59926	-3.61088	3.33255	-0.685894	-4.95786	-1.38537	1.28318	-4.93194	1.75814	-1.17573	3.13386	-2.82067	-7.98697	-0.820418	-1.94242	-4.52466	-1.09435	-2.66784	-3.88576	-0.189957	-0.611874	-0.593723	-7.20083	-5.68273	-1.28336	-4.45848	-2.48782	0.0306047	-4.54236	-0.694226	-4.35799	-10.12	-11.2703	-8.01011	-9.75212	-19.7881	-9.93029	-9.86296
BLCA__TCGA-FJ-A3Z9	-31.177	-3.11554	-0.613777	-0.389994	6.97056	10.1868	6.28232	3.92394	4.47532	2.7905	-1.13522	1.55165	4.43322	2.36302	8.32366	-4.79905	-1.13235	4.10222	-0.80882	10.8135	5.7436	7.24815	-1.74984	1.70704	6.35646	0.772931	-9.31717	2.74892	-7.09829	-8.60063	-4.70295	-1.52311	3.49018	-1.27116	-2.00893	3.9466	-3.51731	1.96453	4.63279	0.0898728	4.01992	0.320357	-14.3578	-17.0972	-22.6867	-17.0594	-28.6985	-12.3747	-13.0937
BLCA__TCGA-FJ-A3ZE	-36.3941	-5.34958	-2.58849	-2.06077	7.28758	10.6627	6.00697	3.88744	5.90455	2.27869	-0.758487	-0.638424	10.4189	2.03654	15.4816	-5.72902	-3.22884	6.43106	1.6394	14.7528	10.5817	11.9004	-3.35196	5.25445	11.3591	3.73072	-12.2713	3.24756	-11.8923	-12.5052	-8.50716	-4.70326	3.16145	1.50711	2.29049	3.86587	-3.77867	1.76035	4.60432	1.69297	5.32424	2.05601	-21.3179	-24.1077	-28.1079	-23.5615	-39.7933	-16.4688	-19.4929
BLCA__TCGA-FJ-A3ZF	-42.3499	-1.29516	-0.26766	3.0006	11.2957	15.5583	11.067	7.36716	10.5663	6.64202	5.87537	2.76851	18.7532	4.68638	25.4821	-4.61109	-2.70823	6.55229	4.56566	17.8597	12.3702	10.3715	1.75475	8.99388	11.9182	4.37753	-11.1196	9.26917	-8.87408	-9.94659	-5.49662	-2.65627	3.84778	3.81873	2.06296	4.38786	-3.06786	2.97422	6.07456	1.14908	4.93886	0.622839	-22.9076	-23.1856	-28.7547	-24.0339	-40.9919	-18.7371	-18.9471
BLCA__TCGA-FJ-A871	-49.5576	-4.15286	0.605149	-0.461841	11.0262	15.6562	9.7124	8.92517	4.50228	6.62489	-0.343313	2.39108	9.10396	1.27836	12.6574	-9.76913	-8.97859	3.81151	-0.556995	15.0059	10.5956	1.67724	-1.53754	4.36511	13.3188	5.86959	-8.70378	8.86341	-6.27052	-10.288	-7.81345	-9.31005	-5.46509	-4.2508	0.575142	-1.79978	-10.6843	-5.44456	-3.9416	-4.46763	-1.25269	-5.3444	-22.7963	-24.1396	-27.6181	-22.3531	-31.9163	-18.1116	-22.7155
BLCA__TCGA-FT-A3EE	-18.1796	-1.14429	0.619574	-0.866199	4.17866	5.93393	3.6204	1.0498	2.02744	0.679859	-0.889902	2.51832	-0.595185	1.93111	2.96315	-0.0784911	2.6117	2.17631	-1.6436	4.23636	1.96915	2.42202	-1.79352	1.41313	4.70572	0.286113	-7.43661	0.271525	-4.77339	-6.18016	-3.9243	2.48196	2.65366	0.819115	-1.80137	2.966	-0.326915	1.1296	3.81547	2.78176	4.22559	3.37747	-7.07922	-11.5727	-13.9831	-10.2785	-21.2561	-6.96638	-9.63121
BLCA__TCGA-FT-A61P	2.12945	0.21271	3.67269	-0.0277723	0.446371	-4.01623	-4.53027	-2.69178	-6.19271	0.0642615	4.80387	4.23898	-8.27309	3.1113	-7.90066	-0.970098	2.03	2.60043	-2.51734	-8.29291	-7.98823	-7.60572	-3.12833	-8.55335	-6.34152	-5.26862	4.19006	-6.28647	5.57638	3.69835	-0.206156	1.8901	-6.31147	-8.02984	-5.14573	2.87338	-0.224059	-0.607386	-6.23786	1.01026	-4.60246	-4.5432	-5.29963	-1.54711	4.18047	5.03409	5.47986	1.84242	-3.62168
BLCA__TCGA-G2-A2EC	-23.433	6.28546	7.82533	1.72412	7.62017	13.545	11.3135	0.0266723	-1.30385	2.82506	0.843992	10.726	-8.14691	8.19517	-6.4298	0.217535	7.51035	2.45398	-5.55099	-11.422	-13.0342	-6.46863	0.00705375	-8.2312	-8.18469	-7.73125	4.86621	1.70795	6.9443	4.48194	5.52984	8.3479	0.37468	-7.76268	-11.5156	3.54706	1.27737	-0.268149	0.208274	0.39688	-0.583919	0.802992	-4.73882	-5.53194	-9.0174	-6.02861	-10.501	-2.77895	-1.42354
BLCA__TCGA-G2-A2EF	2.12963	-8.22588	-5.91682	-8.23385	1.05373	-4.62278	-4.68081	5.97087	5.53632	5.87047	-9.64098	-8.64389	0.711855	-7.45867	3.9607	-2.01968	0.00801189	-6.57001	-8.20061	-7.3726	2.00535	-6.09442	-8.40905	1.36061	8.88649	6.9986	-24.224	-0.903774	-11.3849	4.39559	5.11652	-8.58872	-5.44147	-8.00895	-5.20185	0.888758	-0.896516	-1.92638	-1.4014	0.449539	4.79534	0.744104	-8.46924	-15.0906	-18.2284	-26.8118	-30.8752	6.35093	-12.8422
BLCA__TCGA-G2-A2EJ	-10.8692	-2.00899	1.63698	0.299348	0.705407	2.4805	1.60441	-0.0609678	0.282093	1.84675	-0.573152	0.0923707	-3.70333	1.17928	9.58943	0.352216	2.09413	1.98282	-2.36112	-1.3368	-2.47873	-7.21614	-3.56032	-7.12175	10.9672	6.98898	-30.4213	-7.0447	0.310105	0.00210865	-0.447547	0.462747	1.31968	-1.31924	-5.42821	3.51776	-0.143681	0.712348	0.757103	0.235636	0.0330366	-0.494071	-5.39168	-7.14356	-7.11207	-3.8983	-10.9702	1.72742	-5.78104
BLCA__TCGA-G2-A2EK	-35.0656	5.0874	5.09157	2.80509	6.12076	9.86991	7.53911	1.88718	2.86276	3.57486	1.90695	5.74967	-3.9989	5.64099	-2.48642	6.36771	10.2944	2.62034	1.59806	2.06343	-2.16431	-1.73215	-0.599553	-9.13099	-5.99292	-8.8407	-4.48351	0.672479	2.11719	0.124476	0.719912	10.4341	11.095	0.67024	-1.0691	11.2357	7.62529	9.81153	12.3875	9.79057	10.1578	10.6326	-13.8705	-15.8667	-20.7717	-14.0094	-25.6432	-9.94149	-10.3257
BLCA__TCGA-G2-A2EL	-61.9609	-0.217635	-1.65657	5.8649	12.6182	18.8732	13.7058	9.04841	12.7589	9.51621	7.99394	3.99109	24.3825	5.00793	34.684	-2.47778	-3.7738	9.56303	10.1445	25.6012	26.4345	10.8232	2.74876	9.71657	13.3703	4.41948	-10.6629	11.9485	-12.2304	-11.4081	-5.70796	-4.15467	4.63789	8.50352	4.75677	3.56711	-2.26214	5.1806	9.42377	-1.33099	4.74615	-1.56392	-26.3789	-24.771	-34.0414	-23.8517	-41.3134	-15.0055	-22.8693
BLCA__TCGA-G2-A2EO	1.84064	4.2002	5.93098	0.696587	1.96953	4.01686	3.16643	6.54906	-1.12739	6.39414	5.25685	7.4054	5.13109	5.04716	8.40841	-2.97337	-7.31802	2.0348	-0.747247	-2.04324	5.42501	-8.64236	-0.874802	1.24548	9.73677	8.15536	4.32264	7.52292	4.79943	3.71713	4.21092	-9.3799	-6.56506	-3.22009	-2.13983	0.477631	-3.23959	-7.41352	-7.02828	-5.74518	-0.69688	-7.32402	-5.70197	-3.28212	-3.63884	-2.733	3.79433	-2.16737	-4.02137
BLCA__TCGA-G2-A2ES	-7.75188	-1.7552	1.44236	-1.14003	-1.44514	-4.85502	-5.26353	-3.3928	-2.32512	-0.483699	0.338264	-7.97311	-2.42119	1.0921	9.17575	4.4649	3.27343	4.4276	0.799493	1.69919	6.30147	-6.10616	-9.80267	-8.88772	-0.280064	5.46441	-23.8012	-7.45243	-0.318232	-0.961313	-0.864085	2.07725	1.1449	-1.7288	-4.27579	4.31173	1.23899	1.41094	0.66445	1.05739	0.6606	0.755915	3.58714	-2.23905	3.68004	-3.01557	4.33697	1.01958	-4.13949
BLCA__TCGA-G2-A3IB	-12.0999	-2.74341	0.785875	0.235021	1.93013	4.67575	2.2331	-0.482716	-1.12654	1.14356	0.177363	1.40263	0.202615	2.18108	3.21403	-1.09711	0.118987	5.00125	-0.395221	3.20869	1.14849	0.267001	-2.69801	-8.20437	2.12796	-1.78439	-6.7849	-1.13195	-4.59537	-6.36849	-3.63644	-0.911727	-0.594792	-2.29495	-4.20077	2.39928	-1.60501	0.0600926	-0.439037	0.158906	0.594766	-1.05822	-5.77382	-9.77079	-12.9877	-6.93809	-13.7695	-1.6718	-7.01696
BLCA__TCGA-G2-A3IE	-28.9289	4.1882	2.39652	2.63088	10.3976	13.8094	10.3187	6.49942	6.78692	5.98316	5.17624	5.3647	3.44857	4.71556	6.59406	-3.1574	1.53247	-0.618084	-0.768286	5.39312	2.62688	1.97499	0.456972	3.63472	4.55129	-0.0655422	-4.31661	4.8783	-0.0275461	-2.34398	0.53598	0.756131	3.47535	-1.11812	-1.21241	4.98453	-2.18893	2.15222	5.39217	2.44331	5.7148	1.50623	-14.1605	-16.4902	-40.5267	-16.3094	-27.5177	-13.9628	-10.9467
BLCA__TCGA-G2-A3VY	-34.5657	-3.65415	-2.22815	-0.608106	7.30474	11.914	7.79237	3.3422	6.47479	2.82533	-0.289142	0.744393	9.63576	3.39823	14.1464	-3.02916	-1.18017	7.26953	3.6574	15.8351	10.3538	14.1699	-0.880414	5.79014	7.6567	1.58144	-12.4225	4.81423	-11.7556	-11.8858	-6.62857	-2.34677	5.46396	2.83511	1.41575	5.37285	-0.855492	4.41583	8.01214	1.21387	5.4015	2.01526	-21.8383	-22.5734	-26.5402	-23.6625	-38.1548	-18.2415	-18.3914
BLCA__TCGA-G2-AA3B	-26.5123	-1.12834	2.03346	1.63159	7.48534	8.45461	5.62347	5.10551	5.0995	5.33272	0.242147	2.22032	2.81605	2.8167	15.5816	-2.081	1.36408	-0.0447401	0.798438	8.06595	5.41397	-2.54048	-1.46945	2.95294	14.1812	8.77093	-4.90402	2.64562	-2.17918	-2.09854	-0.95799	0.117719	4.09225	1.83236	0.62516	5.98766	-1.75443	2.67978	6.08307	1.0957	7.8148	1.00629	-25.5409	-15.3167	-18.7618	-14.1339	-25.6428	-10.0378	-10.9353
BLCA__TCGA-G2-AA3C	3.38153	-16.6143	-11.2884	-9.30746	-4.85359	-4.70855	-5.11779	-4.85839	-6.64476	-5.83508	-12.0938	-10.1776	-0.203921	-8.82531	2.31079	2.94628	-1.99023	1.83938	-4.48999	-0.0129662	1.90807	0.830957	-9.45415	0.798306	2.10442	5.31052	-21.6975	-5.02699	-17.4669	-16.202	-11.114	-8.25159	0.468906	3.13051	2.6949	4.38739	-5.15279	0.282181	0.305174	-0.2142	0.832104	1.1705	3.07969	-9.13726	3.80477	-20.784	-21.6657	-2.30512	-4.57314
BLCA__TCGA-G2-AA3D	-31.0897	-1.73638	0.714022	0.990912	8.3992	9.90061	6.69514	4.92728	4.47173	4.86949	0.858056	2.30322	3.91752	3.62424	7.28581	1.00713	3.58187	3.5601	2.58607	10.6159	6.06969	5.63653	-0.30678	2.12584	7.05965	1.39762	-9.30338	4.04968	-4.71788	-6.93818	-3.68862	2.40014	4.48293	2.91588	0.463971	5.10491	0.805233	4.79639	7.62291	1.77381	6.07525	1.60221	-16.6429	-18.8638	-24.8147	-17.3713	-29.8163	-12.56	-12.2913
BLCA__TCGA-G2-AA3F	-27.3535	-0.659212	0.93852	2.8386	10.5308	14.7273	11.0071	6.33394	8.22852	5.63567	0.593712	3.52819	7.42663	4.17093	10.5974	-2.94541	-0.388502	3.45875	2.42543	10.6174	7.12694	5.68441	1.92316	6.21621	7.63776	1.41928	-5.55851	6.67755	-4.86985	-6.44528	-2.77509	-1.13864	4.56197	1.71175	0.235172	4.87128	-1.52561	3.68106	6.71465	1.87979	5.2788	1.38767	-16.2257	-16.3233	-20.8715	-18.1741	-29.6868	-13.4949	-12.8625
BLCA__TCGA-GC-A3BM	-30.4139	1.53871	1.85243	2.57767	5.58458	8.42848	6.57023	3.22493	5.63306	4.25546	5.43287	7.79894	1.40096	6.81333	5.88767	-2.28141	-0.152928	4.25455	0.345846	7.27444	2.68096	7.71578	0.115696	3.16007	3.54553	0.255026	-7.00817	1.8587	-4.3584	-4.418	-0.26217	-0.109801	3.51163	1.2642	-2.12777	2.52302	-1.67395	2.79681	5.85198	-1.11708	2.83107	-1.25544	-12.4586	-12.7617	-16.8969	-14.2633	-25.3089	-10.559	-10.0961
BLCA__TCGA-GC-A3I6	-10.5848	0.957818	2.39345	0.549515	0.702951	4.42357	3.0829	-0.811238	-1.16171	2.02963	5.53715	4.05768	7.99298	6.12191	10.9675	-0.602616	1.52721	3.0305	-0.10628	-0.17373	6.48639	-5.86401	-1.0978	-6.62535	6.67287	2.09976	-0.998926	0.599252	4.51805	3.3404	-0.493086	0.356153	-0.388913	-3.22624	-4.65444	2.1576	-1.06162	-1.06804	-1.04084	-0.66059	-0.79557	-6.25744	-3.08507	-3.37321	-3.39676	-3.52208	4.18877	-0.0758784	-4.52218
BLCA__TCGA-GC-A3OO	-14.8918	-1.27003	1.7767	0.653375	2.35885	7.4905	5.50199	-2.50245	-2.44561	1.07938	-0.531957	2.7274	-1.12514	3.2877	-0.793269	1.23505	4.0465	7.74997	0.314821	0.675158	-0.532625	4.69624	-1.1484	-8.08568	-6.2306	-5.83985	-4.50498	0.284266	-5.33848	-6.40157	-4.25862	5.16084	0.702501	-2.66337	-4.90823	3.91605	1.01418	1.14343	1.48492	0.746769	1.1871	0.935136	-6.63589	-4.38569	-3.96762	-4.25544	-6.12546	-1.2562	-5.16824
BLCA__TCGA-GC-A3RB	-25.3997	0.0848657	-0.515522	3.04005	6.56322	8.95767	6.94176	4.33218	4.06436	5.18147	6.14442	2.83524	12.8454	2.79419	19.8116	-3.1539	-3.76202	6.22183	0.217408	8.50643	13.4965	4.70436	5.64432	10.8933	15.024	8.55514	-5.6012	11.7559	-4.32226	-5.73374	-3.04056	-4.27446	-4.70774	0.606767	-0.630632	-1.57182	-4.99504	-4.31532	-3.26218	-4.38709	-1.1935	-6.06407	-11.4543	-10.5728	-20.3344	-12.0492	-20.6269	-7.15064	-7.30407
BLCA__TCGA-GC-A3RC	2.90237	4.09566	5.96432	6.07474	5.63577	-3.95692	-4.53741	5.97377	5.1098	6.44886	5.05315	-7.64927	6.78329	5.4608	9.51809	4.00872	6.06156	-6.27479	4.92326	0.142731	1.67036	-5.5738	-1.36779	1.10713	3.09029	2.52175	-20.2161	0.385925	5.57748	4.02648	4.51096	-4.7992	-4.94378	-2.72227	-3.7892	6.51223	0.459221	0.510029	-5.71565	-4.26897	-4.99691	-5.18066	-14.2378	3.8111	3.26484	4.48069	4.53019	7.19821	-14.1243
BLCA__TCGA-GC-A3RD	-10.8486	-3.29781	-1.03954	-1.12631	4.00135	8.40081	4.66827	1.39077	2.54392	1.14775	-1.75203	1.97065	3.28152	2.11249	7.56676	-3.94477	-2.52801	5.50278	0.0189728	7.22564	5.04434	10.0748	-2.51006	2.54373	2.4807	-0.598574	-8.83468	0.864087	-9.46473	-10.6609	-5.74754	-3.57484	-0.216644	0.739802	-2.55487	1.46102	-4.94139	-1.50787	0.660536	-1.07793	2.56982	-1.57656	-11.2556	-11.4129	-12.1142	-12.2898	-18.8843	-8.63967	-7.994
BLCA__TCGA-GC-A3WC	3.14893	-11.1771	6.39756	-0.98623	-5.42063	-6.05573	-6.18487	1.69625	-6.27328	6.19271	-8.54397	-4.82505	-9.48429	-7.12332	-8.77321	6.50696	8.45622	-2.67012	6.54142	0.413599	1.32754	-4.31884	-9.76968	-8.84752	2.10327	1.72954	4.72741	-8.20161	5.35578	4.94801	6.13982	8.37963	7.91611	6.46589	5.66569	9.88296	7.34297	7.94198	8.79238	7.98812	7.99679	7.70445	-6.45131	4.67231	4.76965	5.65461	5.57765	8.86145	5.67355
BLCA__TCGA-GC-A3YS	-7.2647	-0.0577594	2.46627	1.33536	2.00859	4.0621	3.04142	-0.337159	-1.15038	2.51407	6.21838	3.8312	7.68619	3.66655	10.8559	-4.20575	-2.38527	4.93227	-0.0123861	2.60395	7.24179	0.050624	-1.45702	1.39737	9.45684	7.04303	-0.757012	1.08445	-0.572457	-1.97289	-0.127893	-2.92082	-3.54584	-2.86871	-3.38528	0.0128072	-5.95252	-4.66444	-4.97016	-2.14227	-3.02265	-8.38391	-1.9027	-4.56039	-2.53947	-2.7471	-5.91899	0.820485	-5.34082
BLCA__TCGA-GC-A4ZW	-39.1828	0.270158	0.0500367	3.74322	10.5287	14.4464	10.7673	7.42486	7.13406	7.25393	6.08141	4.96105	15.2159	4.72043	22.1844	-1.89376	-2.14404	4.99575	2.93915	11.5874	8.16359	6.4539	1.86282	5.21642	7.75224	1.80668	-6.96076	8.77416	-4.02208	-6.0987	-3.44974	-2.70439	0.674367	2.65434	0.834471	1.56897	-3.27908	1.41429	3.81566	-1.18222	2.52981	-3.45088	-20.91	-18.5032	-24.5248	-16.1746	-29.3251	-12.0887	-15.0367
BLCA__TCGA-GC-A6I1	3.5885	-8.34555	-4.5447	-8.48142	-5.26586	-4.86747	-5.26921	2.78355	-6.36454	0.212191	-8.2049	-4.31273	-8.24754	-4.73239	0.505126	4.79366	6.68794	-9.3923	-1.9756	-1.61689	0.132246	-7.68778	-9.7705	-0.286198	2.38363	2.4264	-19.9926	-5.77101	-9.60781	-11.4208	-4.08619	-3.55529	5.12805	0.296453	3.73328	7.38189	5.23553	0.893991	0.875992	5.58552	5.83918	1.75683	-6.67658	-11.5549	-14.5469	-19.9724	-23.123	7.52296	-4.8854
BLCA__TCGA-GC-A6I3	-16.3805	3.66598	6.89573	4.50194	9.66101	10.4559	8.32877	10.7953	2.65983	8.78655	4.53711	7.65202	-0.410013	3.01957	0.650171	-0.100001	4.54786	-2.76752	0.0965567	-3.33489	0.0429327	-10.2322	-0.0686934	1.86265	8.36933	6.05206	3.42043	4.69223	4.58672	2.88005	3.23648	5.26847	-0.679135	-0.269632	0.157684	3.87457	-0.318524	0.261099	1.10162	1.00705	7.68933	-0.785868	-9.3731	-7.94664	-10.1956	-4.63681	-6.58808	-4.42259	-5.41118
BLCA__TCGA-GD-A2C5	-14.9872	-2.74663	-0.090467	-0.816669	6.72636	8.54694	5.4577	2.85654	3.10234	2.30515	-0.825698	1.6088	2.74433	2.22197	6.47342	-2.67287	-1.52864	5.43394	-0.0192387	7.58918	5.55371	9.25813	-0.735382	3.71596	5.44818	1.72438	-7.70017	4.51681	-6.88489	-8.36466	-5.49889	-1.28993	1.46073	1.67807	-1.45947	3.63795	-2.14857	1.60947	3.513	-0.0887933	3.45611	0.0479942	-10.2338	-13.6046	-13.5282	-14.6762	-23.1914	-10.1923	-11.1653
BLCA__TCGA-GD-A3OP	-12.6888	5.42233	8.18667	1.26799	3.94817	8.03275	6.10182	-0.119694	-0.439002	2.70724	0.780942	9.52247	-7.03393	5.68024	-5.55612	-1.60999	2.12576	2.87988	-3.71848	-5.9248	-6.97341	-1.00731	-0.57507	-9.64313	-9.12738	-8.31579	1.39904	0.00299907	6.68449	3.75507	1.51205	4.48162	1.5928	-5.49394	-6.91732	2.93888	-1.43623	-0.522236	1.48341	0.74495	1.06347	0.931151	-5.77591	-3.54698	-3.16251	-3.36044	-6.47785	-1.98455	-4.25136
BLCA__TCGA-GD-A3OQ	-18.8701	-0.410295	1.64797	1.33531	4.49066	6.23351	4.35504	1.45938	1.99808	2.66178	5.5204	2.79988	-1.04126	3.44993	0.805462	-2.79665	-0.20042	4.51054	-1.65855	1.06938	-0.797996	2.22944	-1.72475	-7.69217	1.42102	-2.3593	-7.50517	0.270707	-2.49335	-4.68436	-1.23096	-1.26233	-1.32722	-4.67822	-5.26492	1.87253	-3.47609	-2.17531	-1.70197	-0.683418	-1.73484	-2.28448	-5.35062	-10.0655	-13.8062	-10.4516	-19.4855	-6.71574	-7.68576
BLCA__TCGA-GD-A3OS	-32.471	1.20782	2.81701	2.84617	5.70156	14.6117	10.2238	1.13014	0.6955	5.24195	7.69777	6.87379	2.8378	6.55587	6.13595	-2.77535	-2.31539	8.55814	1.13123	9.37063	3.74369	5.47438	-1.02783	-0.908356	0.781006	-2.03101	-3.97288	4.67856	-4.63619	-8.40221	-4.98111	-1.06259	-5.95864	-1.50362	-3.69173	-0.678785	-4.62786	-4.46768	-4.86935	-3.89427	-3.89229	-5.12659	-16.3031	-16.7232	-17.958	-13.1831	-17.3053	-10.1557	-13.485
BLCA__TCGA-GD-A6C6	-22.0998	-4.69285	0.227556	-0.948594	8.85061	12.2972	7.52977	7.30668	1.93796	5.59591	-0.0889481	2.19175	7.45265	0.440302	11.8495	-4.22557	-2.89487	3.16946	1.62375	10.783	8.03272	4.02178	-2.84033	3.78572	7.70499	3.79036	-5.68868	6.26393	-7.55676	-8.94126	-7.25151	-5.07735	-3.80535	-1.24955	1.5889	1.89788	-6.08126	-3.83865	-2.76643	-1.95311	3.36654	-3.58759	-16.0855	-13.745	-18.0025	-14.5868	-19.4435	-10.8535	-11.5726
BLCA__TCGA-GD-A76B	-7.50084	4.1608	6.7307	0.955357	2.19992	7.68709	6.96274	0.713527	-0.537349	5.08471	4.87036	7.9059	-2.45217	5.70502	-2.20714	-0.284825	6.24805	1.02883	-0.555063	-5.38481	-1.72453	-7.43458	-0.917886	-6.2479	-1.93478	-2.58084	4.1365	0.948395	5.30353	3.80939	4.84936	6.7833	0.335086	-3.01618	-3.43076	1.45982	-0.111783	-0.908213	2.05509	-0.364779	2.90224	-1.83307	-4.01023	-2.66084	-2.20155	-0.471314	-5.07443	-0.378222	-2.93404
BLCA__TCGA-GU-A42P	-39.994	-3.2001	-0.268482	0.961656	11.0104	16.1345	11.0879	4.81282	8.49459	4.85105	-0.563028	1.37709	12.012	2.83198	16.8474	-3.83805	-3.1925	11.3341	4.32472	17.5533	12.3765	16.5789	0.629789	8.25001	10.2386	3.07786	-12.747	7.57794	-12.689	-13.205	-7.33954	-5.15986	2.93286	3.1024	3.32658	2.40998	-3.72781	2.51692	6.32194	-2.34787	3.19639	-3.04408	-23.3638	-24.1256	-28.4084	-26.047	-43.9976	-20.2758	-20.6963
BLCA__TCGA-GU-A42Q	-24.0906	-3.27385	-0.264258	-0.0727794	5.62544	6.69951	3.76754	3.31435	3.85487	1.86876	-0.104261	0.740768	14.2395	1.75949	21.8421	-3.67002	-3.64561	8.37132	2.02593	12.6112	7.60668	10.2404	-0.826217	2.62532	7.85573	2.50784	-9.17845	2.91074	-7.56347	-9.08655	-6.3333	-4.31575	-4.0895	-0.347339	-1.16233	-1.64967	-5.56323	-4.2359	-2.60383	-3.58297	-2.28319	-4.50214	-11.5298	-15.2534	-21.7624	-14.8455	-25.2314	-9.45129	-12.6708
BLCA__TCGA-GU-A42R	-40.4082	-1.18743	-0.310194	0.789094	7.94333	10.7896	7.03002	3.66541	5.76162	3.15782	1.66673	2.51608	6.40185	4.71161	10.3199	-5.67923	-3.21048	6.87887	1.69688	13.7786	8.25292	11.9815	1.30844	4.28322	6.63826	1.50105	-9.65135	5.97583	-7.24637	-8.6196	-3.66967	-4.45463	-0.977278	-1.59759	-1.86908	-0.310035	-4.91065	-1.20461	1.45507	-4.04429	-0.760984	-4.87097	-18.0076	-19.3462	-25.1072	-21.5492	-34.7944	-15.5487	-16.082
BLCA__TCGA-GU-A762	-4.55678	-6.42817	-1.79812	-1.5552	2.53168	0.0842932	0.0509129	4.74785	0.876275	1.96023	-6.30632	-2.7804	-2.17625	-4.56189	0.273479	-6.82703	-2.27687	-8.77707	-2.87317	-1.68073	-0.122171	-8.44946	-3.28431	0.570875	3.208	3.55176	5.65239	0.904576	5.93588	-7.61761	-2.66679	-4.79574	-1.00429	-1.53327	-0.382145	0.115926	-6.65417	-1.03823	-5.67883	-0.802184	0.103648	-1.11639	-5.89273	-9.30276	-12.0142	-16.3088	-18.9385	-1.52397	-4.37671
BLCA__TCGA-GU-A763	-33.0156	-2.36972	0.0169321	-0.618014	8.80736	11.1934	6.55442	6.55162	4.14022	5.87487	-0.292256	2.03423	3.1685	2.46761	8.68021	-5.43072	-2.13221	-0.831027	-2.69497	8.40606	5.32273	1.65983	-4.08915	2.31756	7.75224	2.35334	-7.67916	3.40793	-4.00337	-6.30596	-3.28683	-2.30713	1.35107	-1.81937	-0.669213	4.59255	-4.29444	-0.0884095	3.01879	-0.658153	5.84783	-1.36995	-18.4667	-18.2859	-22.7601	-18.4478	-29.647	-14.293	-13.315
BLCA__TCGA-GU-A764	-12.7559	3.96068	2.81563	1.00405	1.16982	3.92744	2.93686	-0.560245	-1.73814	6.06303	5.06282	6.73868	-3.15916	2.79443	-7.50008	0.846084	3.70058	4.16453	-0.0910954	-3.95608	1.14875	-5.00778	-2.21913	-8.08519	5.34048	4.81845	4.21002	-0.339506	5.78681	3.94918	0.464725	2.35094	-5.34576	-4.39049	-2.91874	1.69405	-0.743757	-5.54391	-5.55708	-0.465043	-4.42557	-5.86351	-6.24458	-2.84759	-1.94272	4.66868	5.02481	-0.257659	-4.94212
BLCA__TCGA-GU-A766	-3.91713	-5.49499	5.17772	-6.52588	0.401946	-4.33559	-4.80596	2.41636	-6.25711	4.91255	-6.70169	-2.98668	-10.5166	-7.05792	-9.0468	3.48529	5.00474	-7.39794	-7.72776	-7.79075	-8.29778	-7.93864	-9.51149	-7.46722	0.770354	0.308208	4.81771	-6.45704	5.1769	4.45277	4.53155	4.95695	-0.154366	-0.931401	-8.69148	6.08801	1.22731	0.00662657	-0.114237	-0.258611	0.786519	-0.576013	-4.8853	3.75973	4.58391	5.58841	4.97791	8.30575	4.77976
BLCA__TCGA-GU-A767	-29.5581	-3.77754	0.654744	-0.894709	10.2015	16.9644	10.6405	5.43368	1.60954	5.13158	-0.0447684	3.53103	3.36728	2.86208	7.08686	-5.8531	-4.53149	8.8593	-0.887605	9.95374	5.54716	10.0442	-2.37139	0.0191358	4.12999	0.488379	-7.18744	7.50853	-7.87715	-10.266	-6.5512	-4.44761	-5.16492	-5.09912	-3.65258	-0.222442	-7.43829	-4.3062	-3.44618	-3.9874	0.0171276	-6.35985	-14.5763	-13.3649	-15.0935	-14.7511	-21.8461	-13.2417	-12.6092
BLCA__TCGA-GU-AATO	-10.8606	1.19721	3.0039	1.52269	3.12806	7.05234	5.45635	1.02499	-1.54406	3.04267	5.08255	4.97202	-1.88323	3.72974	-2.36317	5.24909	7.96476	4.05145	2.5298	-1.29199	-1.70204	-6.31436	-1.12854	-7.2255	-1.91904	-2.64771	3.57067	0.956418	1.63334	2.849	-0.878063	4.64355	-0.0104896	-2.0144	-3.4844	4.44018	0.814939	0.530479	-0.199284	2.10777	2.6164	-0.138089	-5.64641	-3.65987	-4.25889	-2.72727	-5.16974	-0.681545	-4.81966
BLCA__TCGA-GU-AATP	-13.2634	-0.0173176	2.81777	1.17351	5.47416	7.85002	5.17499	3.04574	0.220479	3.81139	5.70226	4.2485	-2.43201	3.465	-3.14494	-2.63147	-0.333471	2.06191	-1.61003	0.559751	-1.36074	-2.43113	-1.32411	-6.51784	0.0106154	-1.38497	-0.767729	0.987147	-2.89278	-4.85526	-1.91832	-0.945919	-3.20486	-4.64238	-3.70962	1.33428	-3.13195	-2.80751	-2.48744	-3.37751	0.736758	-4.54587	-8.68816	-8.69682	-6.0385	-8.42711	-12.9839	-5.65802	-7.21214
BLCA__TCGA-GU-AATQ	-24.2449	-2.72779	-0.119169	0.377048	5.47703	6.64684	3.9506	2.83627	1.38731	3.93177	5.85795	1.8672	11.6807	2.54086	19.1464	-5.23995	-3.36324	9.3721	-0.0574132	9.26742	6.08623	10.8988	-1.3554	2.58982	6.89045	2.60562	-6.03231	3.22728	-6.76483	-7.40896	-4.28288	-4.66475	-3.26395	-0.124941	-1.25363	-0.920829	-6.37115	-3.65562	-1.74115	-4.27468	0.196536	-5.86758	-12.9369	-14.348	-18.4959	-15.6739	-20.3077	-9.18801	-13.7291
BLCA__TCGA-GV-A3JV	-15.4936	4.31237	6.53053	0.577091	3.05952	5.23779	3.32036	-0.489293	-0.55661	1.19356	5.82142	8.02612	-1.4222	6.87542	-0.452747	1.20355	6.66713	1.47799	1.22575	0.580873	-2.24112	-9.67439	-0.719269	-7.22549	-1.03328	-3.81938	3.83338	1.18615	5.77832	3.83191	-0.637071	7.61957	1.30618	-2.22349	-1.75273	2.94096	1.58993	0.963981	1.26539	1.05627	2.15244	0.830372	-2.79357	-4.86148	-6.97111	-3.09762	-6.99138	-0.695893	-4.20565
BLCA__TCGA-GV-A3JW	-37.4007	-3.1563	-2.30829	-0.0352456	8.59035	15.2478	9.77256	3.67097	7.08878	3.86157	-0.0218692	1.20246	11.5975	3.30896	16.7271	-2.93654	-1.21573	10.0363	5.70425	19.1491	12.9418	15.3975	-0.281785	6.06914	9.17272	2.11712	-11.9826	7.03666	-12.4199	-12.7116	-7.91765	-3.41551	4.65047	4.72501	2.56139	5.07922	-1.29453	4.09023	7.59266	2.90304	6.54943	2.75825	-19.9176	-20.087	-26.1575	-24.2657	-39.0099	-17.969	-17.9687
BLCA__TCGA-GV-A3JX	-15.5863	5.56848	4.40045	2.92978	3.27511	8.6259	6.72479	0.207262	-0.26612	3.62548	7.09382	8.38187	9.35326	7.82443	0.467643	1.53573	3.757	5.82005	0.864847	-2.37915	-1.55327	-4.64243	-0.643735	-7.05158	-2.56695	-3.91804	0.592753	0.534564	1.81939	0.593284	0.309989	2.63387	0.120995	-2.28073	-3.29691	5.00668	0.97023	0.646169	1.01375	1.84372	1.66514	0.339818	-7.47295	-4.10803	-6.73603	-2.8338	-5.557	0.262253	-3.64257
BLCA__TCGA-GV-A3JZ	-19.924	-1.67967	-0.431801	1.97986	6.01113	10.0864	6.41836	3.18372	4.09064	5.12572	6.33631	2.88218	15.2908	2.03379	21.1918	-3.04127	-4.00763	7.81665	2.36242	11.4842	15.2497	5.66693	1.30955	12.1283	14.6351	8.91237	-5.45993	11.2342	-7.88415	-8.11161	-5.39573	-4.678	-3.63277	3.33661	0.82955	-0.613172	-4.75321	-2.88346	-2.29721	-3.30427	0.610968	-4.4516	-9.23883	-11.512	-12.4507	-10.5194	-18.2089	-6.20386	-11.562
BLCA__TCGA-GV-A3QF	-19.6487	-3.1412	-1.78301	-0.485232	5.51504	9.62788	5.79232	3.3057	5.17677	2.15845	-0.843648	1.38399	6.75018	2.85837	10.193	0.145165	0.796416	6.08191	3.39952	12.3584	8.50116	10.3476	-1.05919	4.02676	5.62113	0.610468	-8.86631	2.79152	-9.4388	-9.65762	-6.11954	0.236641	4.499	5.15251	2.31509	4.75174	-0.113068	4.66661	7.02955	2.46071	7.41791	2.65607	-13.6865	-16.2501	-16.2483	-17.8846	-29.3468	-13.1054	-14.9024
BLCA__TCGA-GV-A3QG	-11.7427	-4.38743	-1.87801	-0.376369	2.09657	1.97959	1.64771	2.92982	1.61006	2.10524	-6.81472	-1.0127	-3.58214	-2.61691	-2.43038	0.0808538	0.988732	-4.82593	-1.36844	-1.13706	-1.11171	-7.53405	-0.70018	-0.0349731	0.290621	-1.2414	5.86679	-0.544616	-5.90061	5.8836	7.62764	-0.78065	3.12506	0.986765	0.310081	4.07298	1.02376	2.80756	2.99054	2.96239	3.55089	3.2365	-8.8038	-10.1375	-13.5369	-18.2847	-20.9431	-1.38294	-5.00428
BLCA__TCGA-GV-A3QH	-37.707	-1.95027	-0.7705	2.84932	11.1927	15.2468	10.8707	6.47926	9.24386	6.3198	0.642871	3.00358	9.25061	3.41488	22.9213	-3.04416	-3.95626	7.77194	1.75108	13.3458	8.18345	13.4501	1.49233	6.76877	9.37136	2.63207	-10.9215	6.54827	-10.0681	-11.1556	-5.60013	-5.83105	1.71401	2.01534	0.83724	2.55194	-3.12519	1.70813	4.48302	-2.98773	1.97853	-3.43647	-22.6593	-22.3893	-26.096	-20.9686	-35.8085	-15.0084	-18.4887
BLCA__TCGA-GV-A3QI	-35.664	-2.59319	-2.35538	-0.575022	5.92899	10.0791	6.15232	2.16699	4.63764	2.33622	1.35194	0.478765	17.8556	2.76277	25.3042	-5.36859	-6.11572	8.94127	4.42516	18.0225	19.7882	11.0577	1.5277	4.47699	8.28315	2.00105	-11.423	7.52657	-11.0614	-11.7367	-7.84543	-6.07784	-0.462603	1.0161	2.74161	0.160764	-5.523	-1.16341	1.52803	-5.46791	-1.38558	-5.37497	-18.2125	-18.019	-25.9626	-22.1035	-36.674	-15.386	-17.862
BLCA__TCGA-GV-A3QK	-18.8773	4.97943	7.42213	6.07449	9.31551	10.0089	8.53514	8.61817	8.87332	6.98112	5.03427	8.15692	-1.68737	6.58342	-1.68302	4.23557	6.13015	1.75568	-1.13754	-6.31786	-2.62216	-6.21886	0.207917	-5.663	8.30754	4.56328	-0.491189	2.20366	5.83619	3.94561	4.69085	6.48515	0.239148	-2.15933	-3.05508	2.21842	-0.30686	-0.391872	1.01465	-0.764767	1.47127	-1.62419	-16.804	-5.31712	-32.6738	-2.45075	-11.6128	-1.77734	-2.57371
BLCA__TCGA-GV-A40E	-4.71585	-2.44587	0.537659	1.24931	3.92289	3.51483	2.36181	2.97288	0.847457	2.01031	4.82462	1.19817	7.80453	2.08396	13.5924	-3.78263	-2.75061	4.41939	-1.57951	2.80589	8.51224	4.21413	-1.17924	2.10717	13.4414	7.89664	-5.2376	0.744025	-2.83194	-4.59911	-4.36751	-3.93577	-4.64813	-1.60084	-1.76135	-0.168587	-5.90044	-4.57702	-5.47001	-3.36665	-1.42618	-4.99183	-5.33734	-8.45681	-7.5531	-6.20584	-10.4409	-2.85701	-6.29575
BLCA__TCGA-GV-A40G	-34.0133	-5.01501	-1.43238	-2.01527	7.94157	10.5557	6.15981	3.47837	4.12624	1.71505	-0.902846	-1.02476	10.0128	2.49264	14.1025	-2.41568	-1.2543	11.6221	4.58606	18.7489	12.531	16.3034	-1.73798	5.21234	7.57121	1.06915	-11.0853	5.3624	-10.5088	-11.872	-8.16056	-2.50879	3.86038	4.00698	2.62382	3.96878	-2.92426	3.67399	6.53157	0.500887	4.52412	-0.248863	-21.5541	-21.0935	-23.3093	-22.2704	-37.5478	-16.218	-18.4826
BLCA__TCGA-GV-A6ZA	-33.0279	3.63266	3.17424	3.03326	9.52455	9.97049	7.62734	11.657	6.80363	8.98331	4.91989	6.24403	10.5259	3.61914	18.0776	-3.5318	-1.5489	0.575385	-0.128627	6.01993	11.4823	-1.96662	0.26498	10.7842	15.8314	9.40627	-3.73644	4.77322	0.893642	-0.492815	1.4984	-2.04493	-0.220086	-0.16326	0.0186988	1.60286	-3.85564	-0.529714	2.06259	-1.93693	3.40565	-2.58693	-23.9128	-12.5025	-40.8895	-12.9488	-21.4449	-8.51298	-9.15005
BLCA__TCGA-H4-A2HO	-10.8706	4.50688	4.03661	1.62188	4.39766	8.42506	6.63745	0.793973	0.407401	2.96231	0.936176	6.34125	-4.55104	4.5993	-2.2042	-3.72672	1.49391	1.56905	-5.50497	-5.5071	-6.44339	-6.03228	0.0386892	-6.96538	-1.17302	-2.90646	0.113965	1.29524	2.58551	3.01862	1.98654	2.75467	0.229179	-8.31453	-5.45577	2.47777	-2.39802	-2.11535	-1.12903	0.230442	0.473451	-0.649725	-5.90643	-7.21901	-7.47307	-6.85154	-15.1841	-6.61774	-4.1131
BLCA__TCGA-H4-A2HQ	-34.2931	0.110113	-0.0919359	1.5714	6.6127	8.50035	5.47017	3.44939	5.18539	3.60366	5.53264	3.87813	12.2626	3.73397	18.979	-5.62357	-3.34573	4.48127	1.44771	10.352	5.61373	9.508	0.317616	5.43506	8.10448	2.79961	-8.87392	4.13351	-8.6069	-8.76048	-3.4553	-4.6863	0.188333	0.92825	-0.865153	-0.519691	-5.02453	-1.48195	1.92743	-4.38829	0.889895	-4.76236	-17.1325	-16.9412	-22.015	-18.7457	-30.193	-13.1463	-14.7123
BLCA__TCGA-HQ-A2OE	-26.6658	1.203	1.39407	2.06474	5.94932	7.86762	6.09375	2.97126	4.88431	3.84651	5.36415	4.2388	13.0964	4.11565	19.0359	0.0433859	0.502451	4.76633	1.73092	8.36105	14.4006	4.33466	-0.0849374	4.83825	5.72401	-0.0287142	-28.9913	2.9391	-3.4786	-3.27834	-0.6483	0.819762	2.54394	1.90828	0.490328	2.81197	-0.608543	2.98096	5.88683	0.578422	3.75914	-0.778135	-11.2383	-10.6091	-15.607	-9.86262	-20.8657	-5.99329	-7.71723
BLCA__TCGA-HQ-A2OF	-33.8447	-3.44661	-2.09754	-0.7872	5.36817	9.88054	5.81234	2.07086	3.31961	0.897924	0.694157	0.244236	6.33575	2.99416	11.8902	-4.26081	-2.4362	10.2616	2.28164	12.904	8.2923	12.7453	-0.50397	5.1795	7.74571	1.49985	-10.3674	3.49354	-9.67969	-11.5816	-7.27151	-3.3005	-0.877848	0.769508	-0.911369	0.64406	-3.91093	-1.65935	0.633497	-1.1475	0.364037	-2.28382	-16.5259	-15.27	-21.6088	-16.1879	-28.7445	-12.158	-11.9586
BLCA__TCGA-HQ-A5ND	-29.9402	-1.73468	-0.542742	1.24227	6.41658	3.64013	2.03209	4.34304	5.29809	3.14563	6.0622	0.742389	14.1011	2.12385	23.192	-5.09619	-4.92895	6.35274	-0.322274	8.98368	16.029	7.2266	-0.490951	12.3059	17.4391	10.3392	-8.51485	2.62937	-7.09758	-6.54844	-3.91331	-5.62557	-1.34034	-0.086968	0.535583	-1.18686	-6.07762	-2.21726	0.229202	-4.65469	0.00722011	-5.82224	-13.4648	-16.2347	-21.6744	-16.6161	-28.6205	-10.4095	-13.114
BLCA__TCGA-HQ-A5NE	-8.31827	-2.09226	1.80063	-0.00825254	1.18718	5.16662	3.22081	-1.76635	-1.70787	1.05708	-0.3267	1.7977	-2.33954	2.45214	-1.38455	-1.21697	1.23882	6.45526	-2.73934	-1.3818	-3.90861	4.36837	-2.96533	-9.29818	-1.17567	-3.06443	-6.07453	-1.8918	-3.03888	-4.93773	-1.71455	0.644088	-0.998634	-4.58055	-5.48575	1.71729	-1.9452	-1.23186	-1.11043	-0.457582	-1.37982	-1.40915	-3.13398	-3.16798	-3.64461	-4.45124	-10.8258	-2.4645	-4.42617
BLCA__TCGA-K4-A3WS	-6.80927	5.30894	7.52061	2.60742	3.18815	7.60501	6.07462	-1.19118	-1.70553	2.92413	0.935237	8.88328	-2.24645	4.97851	-3.32719	5.04741	7.57303	3.44767	0.530993	-6.1466	-7.0832	-8.03168	-0.432127	-7.6663	-7.26031	-5.68715	5.14796	1.00203	6.67843	4.4222	1.37446	9.04135	-4.21965	-1.59419	-3.25713	4.19468	2.8941	1.84109	1.62211	-0.417538	-4.93389	-5.28021	-0.78514	-0.505629	4.34328	1.51815	5.67771	2.06427	0.943211
BLCA__TCGA-K4-A3WU	-17.1134	5.92765	7.88861	1.8657	2.83164	7.77346	9.87662	-5.75916	-6.20844	6.76598	1.7165	10.3881	-14.1577	7.93917	-13.6612	7.28787	11.0987	5.47169	2.71705	-5.72871	-8.02662	-7.05874	-0.12753	-8.28955	-9.14782	-8.30985	4.69625	1.16165	6.90702	4.62574	6.1975	11.8139	9.02681	-0.0563673	-3.93114	10.4931	8.82192	8.73721	8.70247	8.75267	7.47303	8.34902	-3.67726	-5.23142	-3.49198	4.90619	4.71138	-0.297729	-2.99797
BLCA__TCGA-K4-A3WV	-38.2424	-3.82228	-2.19025	-1.38481	6.3307	12.6045	7.6686	2.09384	3.09267	2.54167	-2.20325	1.99698	5.90902	1.14534	11.2198	-5.56685	-5.48766	9.79566	2.69037	17.4009	10.3938	14.3795	-2.05403	3.38229	5.63692	0.265685	-11.3693	3.84783	-11.1346	-13.2454	-7.20793	-6.44951	0.270874	-0.333323	-1.37463	0.739981	-5.38671	0.0760095	2.34407	-2.42758	0.756824	-2.87057	-18.4419	-20.6274	-24.8065	-18.5611	-30.6023	-13.7681	-16.9223
BLCA__TCGA-K4-A4AB	-12.0048	-0.405589	3.59629	-2.90424	-0.619472	5.31814	3.58668	-4.05945	-4.97458	-0.333449	-3.32287	4.9658	-11.2297	4.30203	-7.64793	-3.0647	1.80008	3.70958	-7.71886	-7.24497	-10.0598	-1.26116	-5.3869	-13.8599	-13.0614	-11.2385	-0.946644	-5.64711	-1.47849	-4.4236	-0.538269	2.58381	1.89519	-9.96598	-11.7903	4.16622	-1.34564	-0.660842	1.70941	1.39637	1.90486	2.59046	0.210907	-3.88321	-1.80463	-4.12428	-1.58752	-1.315	-3.6954
BLCA__TCGA-K4-A4AC	-5.04125	-0.78049	2.37365	0.733819	0.735239	2.18041	1.20887	0.429891	-1.08735	1.35309	4.84582	1.85415	6.50073	2.36311	10.4405	-0.825403	-0.431877	1.80144	0.0848964	0.448629	6.87446	-1.97754	-2.08238	1.00813	9.80535	6.7107	-24.4978	-1.41458	-0.253298	-0.978433	-1.49104	-1.38512	-2.69273	-2.19481	-2.77955	0.893577	-2.77766	-2.14595	-1.93446	-1.66681	-0.245664	-3.12311	-2.65788	-2.20186	-1.68005	-1.19494	4.06412	6.28647	-2.09603
BLCA__TCGA-K4-A54R	-6.42045	4.40341	6.18044	5.96965	1.00938	4.08121	3.03315	6.33598	-1.90928	6.15488	5.06873	7.2631	-7.48245	3.37302	2.32287	-2.09101	-0.113169	-8.53636	-1.29358	-7.00006	-6.56646	-7.80016	-1.02944	0.30938	7.42566	4.48329	4.17848	6.18143	6.0824	4.51469	4.36646	0.754055	-6.63042	-7.87599	-4.53518	1.26237	-2.21723	-6.87561	-7.22426	-0.138392	-4.49067	-6.44688	-4.46786	-2.57124	-2.78731	-1.31115	4.01998	0.991755	-3.20081
BLCA__TCGA-K4-A5RH	-7.13373	-5.835	-2.59384	-1.55407	1.30401	0.439522	0.132345	3.29313	1.58347	1.83981	-6.48693	-2.17732	-1.76557	-2.34839	-0.0795875	-8.052	-7.3991	-10.0217	-8.5192	-9.14457	-0.685722	-7.8268	-1.11103	0.0954901	1.16697	-0.104292	-16.8965	1.04209	-7.44619	5.33387	7.00245	-4.78756	-0.676052	-9.37517	-8.07389	-5.48399	-7.376	-6.24075	-6.496	-6.94377	-6.46757	-1.14269	-5.55996	-10.2865	-11.1999	-18.1924	-20.3039	-1.94056	-5.59228
BLCA__TCGA-K4-A5RI	-11.1237	-1.61715	0.12693	0.341492	3.50827	5.06661	3.15054	1.23294	-0.259373	2.5451	6.35458	2.38839	2.24778	3.86578	16.8804	-4.59423	-2.89882	10.1306	0.601961	8.02278	4.23788	10.7485	-1.18384	2.88137	4.62106	8.38703	-3.61774	2.33849	-4.49807	-5.82096	-2.49917	-4.26444	-4.38064	-1.34321	-3.64906	0.118148	-5.3528	-4.47868	-3.52397	-3.59911	-1.22689	-4.80625	-6.15777	-9.12074	-12.0281	-12.2013	-17.5448	-6.46881	-9.55216
BLCA__TCGA-K4-A5RJ	-5.03506	-7.5055	-5.58666	-2.00903	1.64295	0.855698	0.584667	3.19865	1.99305	1.50331	-8.26212	-4.05495	-0.474229	-3.37261	2.56841	-3.31142	-2.91193	-3.60674	-2.26131	-0.924908	0.962757	-1.36224	-3.38433	2.49468	2.18242	1.41541	-20.6713	0.0831204	-11.183	-11.5713	-4.39325	-6.44007	-0.0976124	-1.09284	0.409515	0.57461	-2.3802	-0.477058	-0.24019	-0.459165	0.238291	-0.164921	-10.2657	-15.0881	-18.7315	-26.2554	-29.1276	-1.87337	-7.50069
BLCA__TCGA-K4-A6FZ	3.09112	1.68676	2.95674	0.647619	0.985901	6.10976	4.20395	-2.04799	-1.81456	2.2434	5.41641	4.39238	-2.66996	4.58573	-1.72226	1.24994	8.51199	8.19153	-0.618261	-8.23231	-9.05091	-3.61367	-2.82078	-8.10126	-8.13857	-6.67725	0.0974489	-1.46541	1.47394	0.0943433	-0.238142	8.4061	0.168769	5.29055	-6.27934	3.06453	-0.277942	-0.241559	0.260617	-0.112193	-1.67335	-1.2393	-4.29077	-3.49789	3.93343	5.24585	5.25282	8.19908	-5.97989
BLCA__TCGA-K4-A6MB	-21.3043	-1.11308	1.44968	1.41535	7.55196	13.0819	8.93348	2.94468	4.6504	3.69192	1.87535	3.90645	6.5638	4.9778	10.5413	-5.13242	-4.38271	9.74521	-0.344019	7.0259	5.73355	6.56056	0.594764	3.37469	3.63325	-0.870718	-7.03578	5.39632	-6.86079	-9.7687	-5.73727	-4.40531	-5.23403	-2.90633	-2.75133	-1.5063	-7.08878	-4.79982	-4.37418	-3.51407	-3.0471	-5.53379	-11.5045	-13.8584	-17.5043	-15.8225	-24.558	-11.6496	-11.7487
BLCA__TCGA-K4-A83P	-10.0623	5.52415	8.48834	6.67466	1.04419	2.13809	1.64787	0.40515	-7.05233	0.905092	4.94757	9.37373	-12.417	6.50663	-12.71	7.10542	9.01924	-9.55994	-0.91509	-1.69721	-1.50156	-10.3374	4.12743	-8.15399	-8.69073	-9.14501	6.02828	-5.7123	6.91247	5.93746	6.76527	9.77337	3.20928	0.892732	0.832889	10.4153	8.36655	2.64581	2.97766	8.36049	3.42142	3.15392	-3.16431	-7.06381	-8.87933	5.17035	4.36559	6.87739	4.73185
BLCA__TCGA-K4-AAQO	-16.8585	4.86109	6.77227	1.2181	3.00272	7.37863	5.5976	-2.94472	-1.90083	1.58779	5.501	5.56467	-3.21389	5.12192	-2.87904	-1.60738	1.09313	4.91213	-1.90318	-2.57793	-1.9244	-6.95911	-0.991693	-8.30949	-8.34256	-4.78096	3.94991	1.35385	3.00467	3.35222	-0.480919	2.53278	-0.0436299	-2.98258	-3.4283	2.72234	-0.0955552	0.300226	0.358397	-0.951301	-1.60493	-2.24908	-5.58666	-1.46699	-2.82701	-2.02127	-6.15214	-0.368534	-3.42292
BLCA__TCGA-KQ-A41N	-38.4278	-3.78389	0.209833	-1.03493	9.93522	14.5092	9.31149	6.32765	5.11986	4.5261	-2.43812	2.50997	5.69367	2.06648	10.8506	-6.5845	-3.12263	4.51228	-0.57723	10.4728	6.51284	6.65055	-2.73798	2.0405	6.83365	1.66034	-10.6764	6.2111	-9.37296	-11.5636	-5.99965	-3.74097	-0.0958827	-3.49502	-1.82957	1.80259	-6.80896	-1.14807	1.72484	-1.95962	3.09017	-3.91566	-21.0266	-22.4374	-25.0988	-21.8678	-35.2299	-16.9369	-19.0415
BLCA__TCGA-KQ-A41O	-45.0255	-4.2985	-1.53354	-0.508611	9.47753	14.467	9.23456	5.68309	7.1893	4.74162	0.489979	2.18166	11.6352	2.57394	16.9098	-6.31666	-3.5155	5.77682	2.20208	18.7153	14.228	10.4003	-2.85799	5.43896	9.86082	3.21675	-31.7851	4.81903	-11.8645	-13.8772	-8.69087	-5.9035	4.18927	-0.045218	3.2365	4.24361	-5.13489	2.30996	6.95106	0.347735	6.38351	-0.0881509	-25.4407	-27.2665	-29.881	-24.8236	-41.272	-18.1496	-22.311
BLCA__TCGA-KQ-A41P	-14.9794	-1.05936	2.84281	-0.0535369	5.9644	10.4277	6.24754	1.99278	-3.02521	2.66169	0.142157	4.0864	-2.43612	2.82567	-1.16876	-0.719014	2.5143	4.22476	-1.30974	1.23334	0.0893396	-3.27127	-3.4617	-8.57044	-2.47026	-3.27751	-2.21103	0.782508	-2.65714	-5.77775	-3.84038	1.22208	-1.89379	-3.6737	-4.47765	2.90969	-2.53433	-1.6487	-1.03726	-0.410502	1.85988	-2.28266	-6.41662	-7.62397	-6.58768	-8.11537	-9.33082	-4.19	-5.96143
BLCA__TCGA-KQ-A41Q	-32.7376	-2.68662	-0.315151	0.00100722	8.3264	10.4134	6.6233	5.23181	6.42664	3.25985	0.0986691	1.78524	15.2384	2.84123	21.2921	-3.06405	-2.39587	2.76564	4.203	12.5555	9.08208	5.9745	-0.738997	5.72061	9.66765	3.79223	-10.7507	5.54038	-7.88873	-9.49853	-5.28733	-2.7838	2.99475	3.029	1.46257	2.33202	-2.97556	1.90418	5.51226	0.667423	5.26178	-0.0239036	-17.012	-18.4594	-22.7146	-19.7424	-32.4425	-15.8206	-14.1913
BLCA__TCGA-KQ-A41R	-33.5869	-1.06576	3.34145	1.51942	10.5243	13.513	9.5718	5.44594	5.83339	5.23585	1.53863	4.69401	5.00407	4.40877	8.02862	-4.69736	-2.2584	2.2091	-1.16149	7.23048	3.85914	3.77886	-1.33584	2.78605	5.69586	1.62211	-7.41616	4.35506	-5.03335	-7.52908	-3.24986	-2.58121	1.17388	-1.8205	-2.41386	3.17931	-4.3156	0.709706	3.07459	-1.33734	3.91564	-2.44258	-17.4313	-15.1173	-19.6068	-16.8323	-27.9951	-13.1584	-13.6407
BLCA__TCGA-KQ-A41S	-11.2645	-1.96347	0.762354	-0.223336	1.26832	6.34888	4.32989	-1.63734	-0.970159	0.175239	-0.223691	2.77843	-3.09247	1.94536	-2.5873	-5.50428	-3.58077	5.47176	-2.06363	0.47864	-0.554577	3.95589	-0.860906	-6.3822	-1.49692	-2.55141	-3.31898	1.01431	-3.7767	-5.87306	-3.87643	-3.13454	-6.00478	-3.67905	-6.56197	-1.37985	-6.23186	-6.31495	-6.19462	-5.11524	-4.01658	-9.52154	-1.55786	-1.08852	-1.52014	-5.11214	-7.32132	-3.69118	-1.45037
BLCA__TCGA-LC-A66R	-4.05574	-5.17449	5.07327	5.43299	1.59675	-0.245338	-0.449648	5.66723	4.95763	1.44817	-5.43063	-3.43118	1.1457	-3.56779	3.96443	5.05178	6.81643	-5.29251	5.97569	1.38923	2.81829	-5.06291	-0.905842	1.0688	3.1038	3.14377	-18.4484	1.42925	4.80508	4.20969	4.76279	6.85177	0.0873038	0.71755	4.65096	0.323087	5.54427	-0.0735702	0.123425	0.0753989	0.926332	-0.68355	3.48897	3.80492	2.92628	4.57805	4.39187	6.87959	-13.8841
BLCA__TCGA-LT-A5Z6	-27.1376	3.95784	2.70793	2.44721	8.1776	9.00714	7.28088	5.45844	5.38494	4.64499	6.27567	4.53008	13.3836	4.79631	18.6562	-0.179468	1.63902	2.78229	1.19034	4.74056	11.9387	-2.13295	0.529647	2.29995	4.70614	-0.0505769	-4.39378	4.28665	0.490291	-1.7008	-0.562121	0.574394	0.410353	-1.78966	0.278345	1.97052	-1.97715	-0.565738	1.97048	0.551637	3.28753	-0.632605	-16.162	-13.9225	-42.4665	-14.9079	-26.0297	-10.0963	-9.06972
BLCA__TCGA-LT-A8JT	-29.0222	4.03681	3.49993	2.12341	7.49186	10.0079	7.71064	5.0385	5.29054	3.98632	1.37279	7.42196	-1.91078	4.62482	1.72844	0.0856426	3.05811	-1.76262	-0.974623	2.42807	0.310418	-2.46328	0.178871	1.39393	3.63646	0.039649	-2.81511	1.88172	5.11447	3.25142	1.68273	3.63995	3.67395	0.413626	-2.58117	5.17915	-0.130328	2.67026	5.03412	2.53089	4.6594	2.4317	-10.6563	-12.3542	-35.8504	-9.92318	-18.8591	-7.91569	-6.06035
BLCA__TCGA-MV-A51V	-31.2562	-3.91302	-0.752348	-3.30939	5.30232	11.0918	6.19568	-0.18972	1.86661	0.407241	-2.02803	0.801191	5.00833	1.91068	9.22368	-4.87021	-1.48577	8.41899	0.671099	12.4716	6.77938	14.0978	-3.43319	-0.342359	2.1846	-2.43925	-12.9268	1.78085	-11.7547	-13.5798	-8.31037	-1.09294	3.27809	-1.87425	-0.465353	2.63916	-3.83656	1.80038	4.71677	0.566496	4.17446	0.490073	-15.5931	-18.5718	-20.0031	-19.2716	-34.3384	-17.2699	-16.045
BLCA__TCGA-PQ-A6FI	-19.5734	-3.33591	-0.763694	0.948019	5.1454	2.48052	1.14503	3.38132	3.03622	3.33888	4.77478	0.0199145	9.3893	0.346134	16.1961	-1.44857	-1.64082	3.15325	1.6692	13.2214	11.9017	-0.224859	-2.04066	1.02208	14.7038	9.21467	-29.733	0.519909	-3.8719	-4.04376	-3.94591	-2.74127	-2.49328	1.43016	-0.39787	0.400255	-4.12403	-2.93342	-1.28466	-2.97371	1.27321	-3.92272	-10.2178	-10.4984	-13.5298	-8.05517	-15.2229	-2.46045	-8.74249
BLCA__TCGA-PQ-A6FN	-15.3347	-4.20424	0.807384	0.0663724	6.75093	9.41894	5.67972	5.01796	0.192292	4.92743	-0.538815	2.19839	1.93735	0.350505	14.4345	5.45478	7.39794	3.6474	3.31307	7.77918	12.0757	-3.79021	-3.41008	-6.31433	4.89566	7.59619	-4.28083	3.57635	-2.62034	-4.35254	-4.81282	7.06572	0.198371	7.88035	3.17902	4.54903	0.243095	0.861147	1.99593	2.53216	7.63402	0.899394	-7.57415	-10.4635	-11.846	-5.77487	-9.1752	-2.51323	-9.57124
BLCA__TCGA-R3-A69X	3.38353	5.04131	7.21981	1.48151	1.12973	5.9973	7.95978	-6.39402	-6.4537	1.97725	6.0803	8.38984	-2.60431	4.69942	-9.70963	6.34032	8.96594	6.65099	-0.964463	-7.31356	-6.2832	-6.31004	-0.214117	-7.3795	-8.08167	-7.57522	5.03207	0.171311	6.00986	4.17362	0.0831487	9.52877	-5.183	-2.51659	-1.7695	7.89473	7.10918	0.667316	-5.08902	0.616147	-4.54379	-0.382435	-2.77408	5.48585	4.66628	-1.06166	5.62098	0.871988	-2.91693
BLCA__TCGA-S5-A6DX	-8.65146	0.259862	6.71063	0.288656	1.06117	5.42489	3.5948	0.248795	-5.42698	1.54137	5.32022	4.15254	-2.1242	3.09312	-2.55871	1.30258	6.34195	1.85062	0.266349	-4.64481	-1.76529	-9.91383	-1.3599	-7.78686	-2.3771	-2.92181	4.5019	0.348926	5.46428	3.61851	-1.25095	6.65265	-3.76984	-2.48601	-2.86388	2.81956	0.752143	0.48166	-3.96993	0.929196	1.00991	-0.559618	-6.29485	-4.2646	-4.22309	-1.76114	4.42593	-0.655496	-4.09921
BLCA__TCGA-S5-AA26	-41.979	-2.03121	-0.547943	0.0909408	8.3371	12.8233	8.28762	4.31104	6.03392	3.42379	1.16277	2.56765	8.12557	3.65581	11.9961	-4.53398	-2.75824	6.27026	1.82683	13.643	8.28685	9.51507	-0.852121	3.93688	6.57829	1.63237	-11.0623	4.74437	-8.01603	-10.582	-5.18388	-3.62383	1.51717	-0.282405	0.023784	0.79179	-4.66361	0.971547	3.85913	-1.59503	2.74985	-2.81198	-19.6451	-21.3626	-26.0341	-21.1743	-35.1295	-16.6163	-17.7058
BLCA__TCGA-SY-A9G0	-20.126	5.7651	7.73482	1.09522	3.62301	9.72226	7.26598	-3.29507	-2.88212	1.66834	-1.30794	7.61397	-10.149	4.75068	-8.76219	6.62191	10.1099	4.62424	0.559513	-1.86818	-5.65652	-7.53086	-0.765349	-12.1039	-13.9642	-12.4333	1.11045	-0.156131	3.43742	1.34432	0.352985	11.4654	7.28691	0.104906	-4.67077	8.15338	8.2499	7.79617	8.01203	2.89672	2.45351	3.11413	-6.72179	-4.67234	-3.93089	-0.439868	-4.17124	-0.575629	-4.67945
BLCA__TCGA-SY-A9G5	-12.4882	4.18219	7.0557	0.15647	-0.21818	-3.42553	-3.66316	5.55853	-5.27296	5.68091	4.65526	6.88405	-7.78377	5.25449	-8.08106	0.32307	5.42448	-8.82648	-1.29086	-7.71942	-7.86938	-8.86505	-2.47016	-8.6363	-5.42477	-4.78841	4.81897	-0.749001	6.6094	4.64184	5.61679	2.62966	-5.43132	-7.81559	-9.44965	2.18263	-1.20692	-1.23748	-5.54451	-0.38775	-5.28188	-5.67077	2.62489	3.31013	3.31954	4.18912	4.50457	6.0651	-2.62282
BLCA__TCGA-UY-A78K	-16.9668	5.0893	7.21788	6.10213	7.33719	8.34205	7.35938	8.24316	5.42058	7.39543	5.03454	7.4089	6.06372	5.63299	3.06573	4.71111	7.30903	-8.15466	5.1343	0.751573	2.26094	-8.07379	4.84268	1.43796	5.9697	4.63646	4.8485	8.28203	6.01745	4.9659	5.64851	7.42187	2.04613	1.26185	4.56108	7.55237	5.68851	1.77209	2.11188	2.23816	6.38544	1.71274	-13.3471	-15.556	-23.3309	3.015	-20.1234	5.14697	-12.3921
BLCA__TCGA-UY-A78L	-10.5128	-4.23382	-0.625821	-0.416725	4.69865	5.61918	2.13819	3.10882	1.99563	1.57998	5.76	-0.0825487	11.0136	1.73867	15.4829	-2.75265	-0.968037	3.65939	0.0639785	5.31881	12.0282	2.14836	-1.30182	1.55778	3.58463	0.107829	-8.18509	2.43148	-6.52723	-8.77239	-7.69095	-2.72224	-3.90049	0.0119511	-1.38426	1.27298	-5.37705	-4.0198	-4.90902	-1.99011	0.438212	-2.69793	-8.00409	-9.55563	-9.82805	-8.6049	-12.0284	-5.19452	-8.65861
BLCA__TCGA-UY-A78M	-26.9076	-4.47983	0.524108	-1.28702	9.96014	14.9806	9.30506	5.33337	1.42547	4.69509	-0.325266	2.92458	5.81773	1.7001	9.61307	-4.72902	-3.42126	3.84974	0.533599	9.39498	7.3416	3.57902	-3.28571	0.921548	6.78771	2.0328	-8.28913	6.43828	-8.7548	-10.8748	-7.88943	-4.57762	-1.87778	-2.19048	-1.1292	2.21784	-7.40577	-2.86857	-0.783171	-1.42353	3.4246	-3.46562	-15.6613	-19.6758	-20.7056	-16.6937	-23.9906	-14.4991	-17.2082
BLCA__TCGA-UY-A78N	-48.4154	-2.09117	-0.501389	4.08939	12.6516	17.0265	12.0449	8.9142	10.1546	8.45808	7.26606	3.16628	20.2804	3.5569	28.1658	-8.31259	-8.64139	8.54767	3.31517	16.6891	20.24	8.93704	1.49613	8.51266	12.3242	4.52138	-11.6717	11.1197	-9.7331	-11.9674	-8.1884	-9.0383	-4.66954	-0.983787	2.65065	-1.56407	-9.75868	-4.9979	-2.4287	-6.27267	-2.02435	-8.56174	-21.533	-23.4616	-31.1753	-23.5083	-38.8353	-16.6594	-20.8785
BLCA__TCGA-UY-A78O	-23.5637	-1.38043	2.4973	0.407077	9.77733	13.6577	8.74926	5.74495	3.12392	5.46895	6.17557	4.55895	4.67283	3.87604	7.2629	0.783462	4.19343	0.92729	2.61767	8.01005	5.41828	-1.51157	-1.73584	1.13371	5.17939	1.56933	-5.73648	4.90298	-4.59035	-6.54054	-4.52513	3.45767	4.96997	2.83485	0.708912	7.29728	0.141182	3.96308	6.84174	3.67596	7.78902	2.84804	-14.2048	-14.8216	-16.6293	-14.0499	-22.383	-9.98614	-12.8505
BLCA__TCGA-UY-A78P	4.15779	-10.8886	4.70157	-8.93914	-5.79827	-5.16368	-5.88785	-6.33798	-7.7481	0.354997	4.32105	1.86234	-9.56851	-7.68614	-8.1327	4.81553	6.23381	8.49848	0.882098	-5.84553	0.479801	-3.96199	-10.1763	-7.42806	2.78186	5.22553	4.33658	-0.636062	4.75892	3.68776	-9.39445	3.12713	-6.59629	-0.431188	-4.7194	1.86013	-0.09328	-6.29481	-7.06459	-5.45663	-4.86779	-6.29801	4.93197	5.60644	5.54229	6.19127	6.04193	9.94779	6.75561
BLCA__TCGA-UY-A8OB	-7.9771	-1.63741	1.83148	1.10654	5.30326	4.69431	2.98841	4.33024	2.05288	3.30212	4.89631	2.17378	7.2034	2.76769	14.2283	-3.28981	-2.38327	-0.764582	-1.6242	0.553005	7.8636	-4.29918	-1.63892	2.30991	13.9922	8.45027	-28.9431	1.66552	-0.617479	-2.95662	-2.16337	-3.31814	-4.20728	-2.28726	-1.77754	0.552277	-4.93821	-4.4688	-4.6572	-2.14597	1.20786	-3.82239	-7.12598	-9.4054	-11.2159	-7.3358	-12.0144	-4.38002	-7.53675
BLCA__TCGA-UY-A8OC	-6.51379	-4.06875	0.0609616	-2.03556	1.65922	5.03773	1.90465	-0.476207	-2.44473	0.792127	-0.871763	1.59471	-0.0834492	1.53758	1.23982	-4.16822	-2.66609	6.23636	-0.503398	5.57153	2.69653	6.34011	-2.72561	-0.266336	2.00654	0.191246	-7.07081	1.31666	-7.24164	-8.52901	-6.33943	-3.32381	-6.17125	-4.76377	-3.68109	-1.00927	-5.60178	-5.8499	-6.1502	-3.95403	-1.75638	-5.15155	-3.35026	-8.81609	-5.86982	-5.84028	-8.99475	-2.37497	-9.58295
BLCA__TCGA-UY-A8OD	-14.2963	4.06585	7.134	1.19468	2.20218	6.56178	5.19154	-1.83545	-2.70054	1.91114	1.25211	8.53162	-3.43707	4.46123	-3.88177	3.0592	8.33569	4.58629	0.652517	-2.69219	-4.37752	-6.97632	-0.836722	-7.18329	-6.33139	-5.30356	4.2909	1.34729	5.23981	2.87865	0.178513	8.93094	4.94133	-1.06327	-2.01495	7.39296	3.07799	2.28981	5.08261	0.843578	1.36483	-0.0217232	-3.07739	-2.56433	-2.2485	-1.48695	-1.45475	-0.665498	-3.33598
BLCA__TCGA-UY-A9PA	-14.8882	3.86908	5.90977	5.30627	7.01157	0.0253706	7.04826	6.13193	6.33044	5.98996	-7.4277	-3.97613	-9.81693	-3.12561	-9.53026	-7.71191	-6.87452	-8.47298	-9.42159	-10.1998	-10.5061	-6.94692	-1.11739	-6.55933	1.5248	0.883299	-25.1639	-5.74021	5.01442	3.53082	4.91128	-8.66807	-5.31787	-8.07273	-10.1851	0.966525	-7.54898	-6.04861	-2.22483	-5.56965	-6.07558	-6.07315	-8.98977	-13.4745	-3.88817	-23.0263	-36.0507	0.0175134	-7.07159
BLCA__TCGA-UY-A9PB	2.83684	-6.65533	5.9777	-2.74041	-4.20421	-4.71302	-5.11922	6.02213	-5.27759	5.96584	-6.42524	-3.19382	-9.45301	-6.60309	-8.52192	3.16807	5.17919	-9.02299	-6.58334	-6.9751	-0.317351	-7.83453	-8.08832	-0.859221	1.56951	1.66261	5.09389	-0.247832	5.75976	4.51048	4.99508	5.51766	0.0248932	-5.48283	-6.15786	5.84126	1.3228	-0.143263	-0.106699	-0.372495	0.430776	-4.098	-5.31305	4.00269	4.29173	4.911	5.11401	7.52674	5.0361
BLCA__TCGA-UY-A9PD	-30.2932	-2.45791	1.00707	-0.109697	7.83202	10.9517	6.82475	4.2491	4.63485	4.43589	0.26558	2.97869	6.76534	2.79912	9.90312	-2.01654	-0.575425	4.38058	4.12415	11.4822	15.9205	3.36492	-0.0172856	4.09635	5.92385	1.72484	-7.99067	5.48956	-6.81084	-7.74413	-5.75345	-0.185411	-0.0634908	1.80791	1.03649	2.66312	-3.45431	-0.272443	1.33708	0.387416	5.4752	-1.0593	-13.8499	-14.9243	-18.7195	-16.0679	-27.8835	-14.6829	-12.6451
BLCA__TCGA-UY-A9PE	-28.3636	-4.08384	-0.97938	-1.28321	6.63986	11.1633	6.39558	3.45146	1.76744	3.27715	-2.41554	1.49714	3.95062	1.03934	8.09929	-1.78868	-0.0300945	7.45991	1.34649	11.936	7.54301	9.05449	-1.90427	2.70476	4.21306	0.566352	-8.98694	5.58119	-10.6689	-10.3359	-7.12402	-0.264832	0.624681	0.940307	0.109546	3.72076	-2.25793	0.660762	2.74071	0.16531	5.4443	-0.760828	-15.0473	-15.6232	-18.4271	-19.057	-28.994	-14.1635	-13.9133
BLCA__TCGA-UY-A9PF	-11.2724	4.37831	6.90888	1.85451	2.67804	6.35719	4.86588	0.39411	0.45488	2.12137	0.0453262	4.3082	-5.24037	3.74542	-3.0192	4.01085	6.2885	-1.15307	-0.381928	-1.92345	-2.73715	-8.50362	-0.896455	-7.25953	-2.33062	-5.53269	-1.39038	1.02791	5.44702	3.29102	1.1835	7.92038	6.96551	-0.310637	-0.994626	6.51445	4.96493	6.50711	8.04194	2.06783	7.31236	2.5819	-1.52255	-0.471985	-3.59613	-0.942713	-7.82152	-3.04617	-0.280127
BLCA__TCGA-UY-A9PH	-2.01545	-5.44411	6.25804	4.79777	0.987946	-0.333355	-0.283901	2.09617	0.140665	0.575428	3.8336	-2.6647	-8.35388	-4.72989	-7.98783	3.53567	4.79913	-8.57499	-5.62788	-6.79673	-6.39783	-7.25939	-8.06001	-6.53984	1.52729	0.995447	4.58144	-5.37247	4.93559	3.89381	3.86946	-3.66443	0.635909	-5.41772	-2.75439	5.79994	-0.722382	-4.69708	-4.90907	-4.01309	4.4035	-4.58062	-5.44952	4.00621	3.73806	4.83547	4.7149	6.5224	5.12382
BLCA__TCGA-XF-A8HB	-22.102	-4.22944	-1.0136	-0.967844	6.1992	7.33286	3.3996	2.73295	0.536672	2.3219	-0.00340929	0.304735	11.046	1.28041	18.558	-0.802171	0.184502	6.95524	2.12448	11.1071	15.6386	5.84077	-2.58404	0.739312	5.07519	0.00444944	-7.85297	2.48998	-7.07986	-9.15364	-6.01032	-1.49859	-0.0905345	2.48669	0.807768	2.69326	-3.08472	-0.788816	0.61376	0.0608486	4.62987	-1.8421	-11.5003	-12.6585	-17.8549	-13.2263	-23.1298	-8.36508	-11.3209
BLCA__TCGA-XF-A8HC	-38.9866	-4.74516	-1.94503	-1.96281	8.69821	13.0094	8.05601	3.93684	5.59376	3.14359	-1.98092	-0.400388	10.2234	1.62207	22.3838	-4.00499	-1.4883	7.77512	3.42611	17.7304	12.1882	12.6968	-3.49531	3.78014	7.55573	1.27297	-12.2209	4.13331	-11.0402	-11.8659	-7.97184	-3.68362	5.54336	2.31405	2.0009	5.16797	-2.78953	4.41333	8.43198	1.27116	6.11917	1.35665	-23.3646	-23.7019	-25.8403	-25.5387	-40.9794	-19.907	-21.0048
BLCA__TCGA-XF-A8HD	-2.73462	-5.4444	4.63453	-1.13297	1.24952	-3.19046	-3.18348	5.73441	1.63007	1.26808	-5.07954	-3.50654	0.0568643	-4.61457	2.11332	-6.7311	-0.0506494	-7.10776	-7.52059	-7.04049	-0.0835035	-6.9286	-1.65051	-0.481793	8.11748	5.91863	-16.6228	0.0406471	5.08673	4.30927	4.53663	-6.44002	-4.84272	-8.1713	-7.45865	2.11048	-6.47479	-5.50621	-5.84394	-3.24793	0.490525	-3.96071	-12.0105	-16.3559	-20.7273	-26.2918	-33.1647	0.484514	-10.9657
BLCA__TCGA-XF-A8HE	-8.24378	3.84632	5.40648	5.29721	-0.627	-3.71196	1.88637	-1.68337	-0.96703	5.70766	5.35195	2.8322	6.65499	2.78856	10.1656	4.48926	7.3403	9.36384	0.121917	7.2263	7.12059	-3.63719	-3.34682	-7.9266	2.72351	2.55824	-19.9232	-6.74347	4.39429	3.69923	0.522757	3.69808	1.70566	-0.7444	-4.12002	4.43084	1.13786	1.64476	1.20906	0.51442	0.599543	0.489005	-3.50532	-2.80885	3.38363	-2.27882	-1.99285	1.2047	-2.70366
BLCA__TCGA-XF-A8HF	-13.2299	-1.28871	2.82314	-0.257688	8.1284	11.3926	6.67441	4.60303	0.642774	4.38908	0.150619	4.6037	1.80933	2.21235	5.76471	-5.60509	-2.52805	2.10135	-3.08614	2.23015	3.17665	-0.363698	-1.74671	2.86669	5.53287	1.48124	-1.71375	3.8237	-2.68426	-4.54795	-4.30682	-2.8052	-4.61861	-5.24857	-1.61965	1.63552	-6.44315	-5.69729	-4.72858	-2.09912	2.97784	-4.52638	-10.8644	-10.5997	-12.5194	-10.7919	-14.297	-8.33088	-8.28001
BLCA__TCGA-XF-A8HG	-22.2597	-4.73398	-1.20827	-1.8374	3.8668	7.25482	3.56189	1.52203	2.87602	0.245385	-3.09903	0.695515	6.59701	1.65583	10.8644	-2.11438	0.032184	2.62847	0.344902	8.0112	6.1146	8.42953	-3.95231	4.57285	6.94529	0.917251	-7.77911	0.513004	-8.35761	-9.18502	-5.85715	-0.512381	5.73206	2.16017	0.579289	6.36688	-0.883917	4.21251	7.21543	3.46224	7.75472	3.43547	-15.6374	-16.7729	-21.0508	-16.2249	-26.5806	-11.1825	-12.1244
BLCA__TCGA-XF-A8HH	-12.3061	0.372271	2.72036	1.65017	5.52925	8.30003	5.81458	1.2886	0.343672	2.10792	1.16879	4.59594	-0.762267	4.37564	0.446785	-1.57649	1.57289	4.60256	-2.66385	-0.58337	-1.65629	0.0901868	-1.1724	-0.00726885	-0.524166	-1.43377	-2.48809	1.28817	-2.47975	-4.49838	-2.77504	2.68672	-0.835932	-1.18359	-5.36913	2.75414	-1.30617	-1.41248	-0.737439	0.213114	0.922157	-1.00242	-7.71171	-7.46757	-7.50653	-8.97981	-12.4869	-6.19432	-6.99154
BLCA__TCGA-XF-A8HI	-33.0028	1.29285	2.90524	2.74335	6.71878	8.43409	6.24249	4.14238	5.02926	3.74088	5.50433	4.31432	1.70024	7.21789	3.67818	-2.09992	1.16297	5.13778	0.134078	5.54716	0.813808	5.85804	0.985425	1.19173	5.2588	1.43462	-6.35168	2.51766	-0.878257	-2.80943	0.632609	0.761534	2.57341	1.0082	-3.51557	2.42637	-1.58825	1.62084	4.05155	0.44855	3.37504	0.06796	-11.7278	-15.5731	-18.8169	-13.7852	-25.7129	-9.98294	-11.0595
BLCA__TCGA-XF-A9SH	-16.1966	-1.24453	2.59199	-0.42446	5.94531	11.1022	7.34705	1.20405	1.26085	1.75661	-0.44196	4.48451	-2.5324	4.70576	1.10212	-0.944634	2.96206	1.47541	-4.44126	-0.323624	-1.67306	2.59014	-3.86948	-1.16997	-0.628262	-2.88751	-5.26026	-1.24732	-3.50522	-6.09021	-3.60481	2.97711	5.18988	-1.05137	-4.09263	6.3973	0.830193	3.5147	5.4934	5.7821	6.27838	6.59822	-10.0828	-12.1023	-13.0023	-10.8514	-14.5534	-9.07763	-6.79049
BLCA__TCGA-XF-A9SI	-11.7478	-3.90966	7.75295	-0.738661	2.15952	1.30617	1.17832	3.46929	0.539795	2.78019	-4.74435	-0.293365	-8.99905	-2.34233	-8.55307	0.0231689	0.88232	-7.94214	-1.94469	-2.28442	-1.96786	-7.73261	-1.42374	-1.82161	0.093027	-0.415229	6.63123	-0.0595474	7.29784	6.44297	7.51258	-0.707122	2.22739	0.304141	-0.441762	3.53404	0.637995	1.92018	1.98997	2.34724	2.95873	2.39513	-8.15108	3.97147	3.6448	5.40505	4.82189	7.99511	5.68127
BLCA__TCGA-XF-A9SJ	3.19011	0.0518159	4.14188	0.505282	0.3143	2.69827	1.60156	-0.292703	-5.6468	1.28504	4.51634	3.30949	-3.85946	1.8255	-7.26614	3.56229	5.81993	2.77813	-0.79319	-5.24086	-5.252	-7.21001	-6.15236	-7.8431	-0.709253	-1.54323	4.47917	-0.27245	5.52935	3.44889	-0.628105	3.47301	-5.85685	-5.3164	-4.81095	1.81301	-0.427183	-5.47317	-6.58799	0.990656	-1.04008	-3.33386	-1.36775	-0.380125	3.53808	-2.2063	-2.02494	0.280897	-2.34867
BLCA__TCGA-XF-A9SK	-5.96824	1.40033	4.87224	0.134447	2.90605	7.02839	5.45296	-1.30797	-7.50316	2.61892	0.0426585	5.50739	-8.02328	4.14535	-7.24529	-0.189365	4.25801	1.3802	-5.05068	-11.9379	-11.4677	-6.76205	-3.12817	-11.3542	-10.1205	-8.40569	4.48614	-2.74284	3.3303	0.514396	1.36004	3.95466	-2.10861	-8.20587	-8.19943	3.76667	-0.344331	-1.25426	-1.89548	-0.355917	0.612754	-0.543807	-4.75218	-4.76794	-2.00166	-0.261634	5.45269	1.50121	-2.92186
BLCA__TCGA-XF-A9SL	-23.1273	5.24871	8.13554	-0.0390131	0.459913	5.39238	3.52833	-1.8579	-8.23666	0.636917	5.42628	8.69753	-15.9901	3.21057	-15.5989	7.54383	10.0298	5.3303	6.66314	-6.45698	-9.13616	-6.95545	-0.800839	-10.0809	-10.2587	-8.85572	6.39988	1.2262	7.49827	5.11932	5.49045	10.3079	8.39434	-0.467084	-5.369	10.4238	8.74443	9.06991	8.81563	7.86233	7.39369	7.12562	-7.18853	3.78413	3.77643	5.33109	5.28067	6.74724	-3.98817
BLCA__TCGA-XF-A9SM	-5.1126	-6.03717	-2.72625	-1.5405	1.21378	-0.00633643	-0.0541372	3.43078	1.13747	2.02021	-6.54843	-2.81488	-1.88463	-3.6569	0.803016	-2.01755	-2.08567	-3.77868	-2.23118	-1.34741	0.232448	-5.62993	-2.19186	1.70045	2.63079	2.15512	5.44945	0.854578	-7.31664	4.97168	-3.00633	-4.99957	-0.434889	-0.827092	-0.0803418	0.39989	-2.16137	-0.663798	-0.463348	-0.760295	0.193636	-0.976435	-5.07417	-7.67435	4.43744	5.71479	5.08366	8.34251	-3.56516
BLCA__TCGA-XF-A9SP	-7.603	0.419446	3.34742	-0.611877	2.42214	7.38248	5.22558	-0.865672	-4.03373	2.14657	1.05877	5.62515	-5.73225	3.27468	-4.58303	0.133226	3.05276	6.49163	-0.188904	0.622705	-2.27862	-1.87409	-1.67509	-8.81045	-8.87729	-4.65761	4.96673	1.74052	1.80803	-0.280992	-0.519386	4.35998	-4.49396	-6.2476	-7.59432	1.54308	-0.375135	-2.53285	-3.48649	-1.71178	-1.17462	-2.85364	-5.55376	-2.74908	-3.32595	-3.6301	-1.00748	-3.72845	-3.62554
BLCA__TCGA-XF-A9ST	-42.1443	-3.58643	-2.88544	1.47831	11.6367	17.193	11.6463	8.18331	8.2278	6.40042	-0.818439	0.826106	19.7139	0.98211	28.3949	-5.44554	-6.3762	11.4376	5.68314	21.2628	22.4217	15.2628	0.443136	15.5034	21.2838	11.251	-11.8435	11.0105	-13.3121	-14.0663	-10.0205	-8.65163	-1.09599	4.79036	4.75341	1.77151	-6.80737	-0.914461	1.22234	-2.51381	3.90131	-3.82244	-23.5742	-22.3132	-27.4641	-23.7225	-38.6118	-19.0413	-21.8587
BLCA__TCGA-XF-A9SU	-9.21714	0.589603	5.058	0.598767	5.81356	8.93524	5.69206	2.53148	-4.24786	4.49292	5.60554	7.01764	-3.90939	2.97095	-3.06663	-0.12614	3.41189	1.98876	-2.55358	-2.5952	-2.33942	-9.51226	-1.82505	-6.57103	-0.0845156	-0.80947	4.15781	2.95531	2.82664	-0.0438912	-0.664518	3.99518	-4.29685	-4.06217	-3.05034	2.42553	-1.05381	-2.86552	-3.62174	-0.939207	1.19294	-3.07917	-3.99881	-4.92107	-2.40772	-3.2606	-2.90925	-3.38469	-3.91488
BLCA__TCGA-XF-A9SV	-12.7038	-3.25639	0.0317168	-1.21288	5.72099	8.63314	4.84437	1.95944	2.19972	1.6792	0.808575	2.18759	4.52687	3.5127	7.73497	-2.26025	0.0910119	5.20729	3.00411	8.56159	6.16226	5.79543	-0.522142	1.85079	2.72175	-0.913156	-6.01389	3.62194	-5.79688	-7.47101	-6.08995	0.206686	1.04913	0.497234	-1.50127	3.80534	-2.20218	0.924795	2.29703	1.30775	4.99646	0.321208	-12.9367	-15.6526	-13.7318	-15.1945	-23.1951	-10.0334	-14.2436
BLCA__TCGA-XF-A9SW	3.02186	1.86571	3.49436	-1.6262	-0.154321	5.24102	3.47984	-8.69377	-9.38383	-0.895001	0.537437	4.24184	-6.85941	3.34679	-7.7034	2.09855	7.81708	12.5215	0.812734	0.045912	-1.83984	0.272731	-3.21973	-10.2463	-11.0858	-9.10018	4.76663	-0.243186	0.941066	-0.715703	-1.97703	8.55751	-0.97232	-3.63461	-3.87583	1.99338	0.576609	0.0785091	-5.90688	-3.48044	-6.19377	-6.06154	-2.75371	-1.58045	5.94582	0.556644	6.12115	2.60036	-4.46764
BLCA__TCGA-XF-A9SX	-0.784278	4.31104	7.64538	4.43653	5.85433	1.02856	0.787681	5.11945	-0.961655	5.93368	4.46962	7.93183	-8.25524	-2.13144	-8.25691	-5.00119	1.00277	-9.92599	-5.91056	-7.76816	-7.1065	-9.85724	-3.48827	-1.76772	-0.0528239	0.597707	5.132	4.13747	6.12386	4.03495	4.50611	4.65898	-5.08273	-7.35344	-6.25822	-2.65087	-6.08992	-5.271	-5.39253	-3.74352	-3.60099	-4.94977	2.86531	3.20712	3.81831	4.43744	5.14562	5.05911	3.71209
BLCA__TCGA-XF-A9SY	-3.31016	-5.79544	-3.51431	-1.54508	1.13976	-4.61299	-4.64534	6.13545	1.44239	0.958871	-7.44964	-3.59679	-1.11631	-8.53355	1.92871	-1.43521	-1.8657	-7.39625	-2.25287	-1.15839	0.639531	-6.94708	-7.47742	1.22913	3.35576	5.49724	4.80437	0.16147	5.61446	4.71383	4.758	-3.70984	-0.331585	-0.20358	0.992164	0.0691741	-1.50942	-0.439747	-0.389065	0.00698853	0.337372	-0.232335	-4.79175	3.98787	4.07731	5.43123	5.28616	7.53501	-4.88909
BLCA__TCGA-XF-A9SZ	4.39827	-3.22955	1.3137	-2.6815	-0.376409	5.01367	2.36456	-1.66737	-5.0803	-0.67624	-0.382876	1.92849	-4.09929	1.36412	-4.36666	-1.49907	-0.168586	6.57071	0.252247	1.32532	0.60938	2.40223	-3.46127	-8.48523	-3.52817	-3.32277	-2.01753	-0.979184	-4.06284	-5.28779	-5.40488	-0.865335	-5.38855	-3.48576	-3.60793	1.16505	-4.24263	-4.59626	-5.07284	-2.18237	0.392619	-4.14957	-1.89937	-4.76303	-0.803868	-3.68155	-4.59787	-1.70112	-3.06144
BLCA__TCGA-XF-A9T0	-15.8304	0.195835	3.78152	2.99572	8.86839	11.912	8.31765	5.40279	4.37012	6.48666	5.35598	5.45039	2.66934	2.99338	6.10254	-1.08775	-0.0710358	-0.609351	0.202435	4.29372	4.96009	-6.91457	0.41954	3.41866	5.22353	1.12923	-2.03311	5.29544	-0.628085	-1.76698	-0.881701	1.02178	-0.43121	1.37251	1.7581	3.22997	-2.00555	-0.190436	1.63527	1.23857	4.89506	0.209857	-8.94972	-9.56539	-9.65938	-7.08131	-11.6591	-5.29538	-8.05664
BLCA__TCGA-XF-A9T2	-39.8584	0.0409608	1.6612	2.25922	10.3488	15.5786	10.8685	5.78535	5.08766	6.19935	7.36201	5.75849	7.32661	6.38627	10.1078	-4.67746	-3.42522	8.13179	2.15471	9.28844	6.25199	3.86683	0.417229	3.18131	5.60679	0.790217	-5.13674	7.31255	-4.57137	-8.24584	-4.03885	-3.14469	-2.51319	-1.11498	-2.13533	0.747823	-5.63378	-1.27437	-0.26657	-2.70742	1.35421	-4.61965	-18.7144	-17.5346	-18.7419	-15.1343	-22.1224	-10.3101	-18.3211
BLCA__TCGA-XF-A9T3	-12.0172	4.05302	3.82134	1.32083	1.66738	4.46431	3.28935	-0.18888	-2.08919	1.64977	4.54353	4.58528	-3.56528	1.76084	-2.01772	0.533569	4.01682	4.39973	-1.46053	-1.94039	-2.73465	-6.27159	-1.99859	-7.16672	-0.577522	5.11648	4.32342	0.813811	1.46722	3.89887	1.35829	4.64228	-0.284595	-1.79391	-3.45353	2.76949	0.864518	0.813345	0.629024	0.965295	0.0293648	-0.0576924	-2.39063	-1.2648	-1.89589	-2.62261	-3.78145	-0.507751	-2.48997
BLCA__TCGA-XF-A9T4	-9.73396	1.64242	2.4791	0.934382	0.1657	5.16649	3.10355	-1.71252	-0.754553	1.94673	1.61062	4.3132	-2.99034	3.85065	-1.93795	-0.139551	3.47149	3.12234	-2.23665	-1.52614	-3.50608	-5.50119	-0.763737	-7.11221	-2.625	-3.52682	-2.48198	0.258584	1.64651	0.804272	0.496827	3.03252	0.194752	-2.87086	-5.37292	3.83925	-0.674976	0.037973	0.408253	1.50327	0.864291	0.28038	-3.0785	-1.49966	-1.09345	-1.07411	4.82294	2.41856	-1.85778
BLCA__TCGA-XF-A9T5	2.09888	-4.93516	6.40015	-0.873314	1.76848	0.653496	0.787943	7.51304	0.322759	6.02753	-4.89273	-1.04817	-0.68309	-3.27549	1.93195	3.74684	5.30256	-8.76577	-1.42181	-1.03671	0.983776	-9.36399	-7.04264	0.354388	3.09996	6.92039	4.75703	0.711242	5.24374	4.57431	-2.4312	5.53589	-0.21665	-0.378678	1.10093	5.96538	4.11145	-0.0820268	-0.294397	0.115239	0.501589	-0.154293	3.27975	3.5193	3.25395	4.37695	4.28194	6.67351	4.49906
BLCA__TCGA-XF-A9T6	-10.3599	-3.11863	0.229503	0.583157	5.82336	5.11079	2.40002	5.36149	1.65347	4.51729	4.34625	0.706718	7.40183	1.59991	13.4274	-2.83931	-2.3617	3.27699	-0.490987	3.67868	9.4926	3.79741	-1.85478	1.86282	13.3905	8.31142	-4.43157	2.72872	-3.81282	-5.06777	-4.7317	-3.0989	-3.81281	-1.32363	-1.2372	0.745168	-4.77232	-3.97797	-2.94224	-2.78013	2.50815	-4.25835	-7.22974	-7.41257	-11.0553	-7.96529	-10.9442	-3.71649	-6.59256
BLCA__TCGA-XF-A9T8	4.08518	-7.62937	5.69979	-9.13786	-6.03666	-6.11291	-6.50549	1.15214	-7.31707	-0.677437	-7.44282	-8.83844	-1.76166	-4.34209	0.5844	4.33388	6.38247	-1.57479	-6.43552	-1.2993	-0.00764996	-0.530566	-10.7206	-9.07023	1.41102	0.764814	-21.1087	-8.63383	-9.4358	3.92683	4.94914	6.15402	-4.52241	-5.8094	-9.16946	6.86396	1.94618	-4.60816	-4.92038	-4.35357	-4.12039	-4.71501	4.22103	4.33719	5.32781	5.38144	5.3318	8.08665	5.20525
BLCA__TCGA-XF-AAME	-3.60888	5.58153	8.36468	0.657577	-6.98381	6.2472	4.55047	-7.88281	-9.44069	1.85071	5.89712	10.2693	-12.4357	4.33198	-13.306	8.07317	10.6298	-1.64316	7.92298	-1.69829	-5.70769	-1.17995	-2.60975	-8.43351	-9.53973	-8.69429	6.82799	-0.0358837	7.41887	5.45752	6.18346	10.5545	0.992307	-0.209074	-1.82259	11.0998	9.29647	0.909524	0.908831	8.65853	1.1699	1.66362	6.03827	5.54718	5.82201	6.766	6.5687	9.68109	6.93277
BLCA__TCGA-XF-AAMG	-28.5128	0.980644	-0.107428	5.63102	9.86926	15.0849	11.2491	7.23657	8.24509	8.19337	7.70377	5.75791	18.4555	4.80287	24.5342	-2.67794	-4.73508	7.04938	5.13991	21.5432	18.4496	4.59381	6.45855	14.3135	14.4176	8.82859	-5.2646	15.0982	-8.54411	-8.30074	-5.02022	-3.9223	-3.07465	5.07871	2.32309	-1.61303	-5.29966	-2.72149	-1.18113	-5.18026	-0.883257	-6.39868	-13.9866	-12.3144	-16.1973	-12.9041	-21.0714	-9.62991	-12.1771
BLCA__TCGA-XF-AAMH	-37.6041	-0.980996	1.47118	-0.315438	9.62299	17.8634	11.535	5.04417	1.19682	5.32989	7.7368	5.91652	6.72901	5.43631	12.0354	-6.61703	-5.04871	8.91659	-1.18883	10.7672	7.5514	10.0864	-1.53153	4.09179	8.0116	2.8082	-7.19206	7.94847	-8.53663	-11.6824	-6.60872	-5.89864	-5.34739	-5.20379	-3.47032	0.826353	-8.35132	-4.57758	-3.74049	-4.60914	0.454249	-6.48423	-21.8878	-21.6638	-23.781	-18.688	-27.1527	-13.7968	-21.0861
BLCA__TCGA-XF-AAMJ	-17.1301	1.66636	5.70973	2.41497	6.28628	9.8105	8.14155	1.66489	-0.978336	3.67495	2.26825	6.93673	-4.81347	5.78998	-4.39595	-2.38149	0.955299	4.04742	-4.24365	-5.63251	-7.26214	-2.84951	-0.545707	-9.00514	-5.4024	-5.21093	0.485764	1.64791	2.80387	-0.749263	1.44039	2.38129	-3.28988	-8.93571	-8.39015	1.74247	-2.0408	-2.86483	-3.35899	-0.649253	-2.28374	-2.62238	-6.11471	-5.54412	-4.94612	-6.23338	-6.06004	-4.51683	-6.27299
BLCA__TCGA-XF-AAML	-28.1374	4.51817	2.92753	3.55827	9.14439	10.577	8.51024	6.27735	6.46139	6.43507	5.61963	7.61322	11.3985	4.76878	16.8928	0.113985	1.33956	1.42506	0.366616	6.18007	11.0465	0.804009	1.12464	4.08735	13.1436	7.06776	-5.07689	5.1572	-1.6559	-2.244	0.137551	0.598918	0.0851039	-0.323044	-0.496884	2.08496	-1.99334	-0.198823	2.09211	-1.45133	3.41752	-3.14744	-13.1499	-13.2061	-38.2788	-9.27987	-19.7859	-8.09884	-5.90279
BLCA__TCGA-XF-AAMQ	-22.9285	5.08382	7.22412	6.25526	6.47932	7.05372	6.71653	7.03699	6.3169	6.84077	5.54142	7.71017	5.34556	6.46957	7.91588	4.60206	6.95801	-6.59212	5.66049	0.372658	1.04505	-6.81292	5.02841	1.51803	8.02912	5.03259	4.76491	6.46074	6.73592	4.9892	6.32703	7.19628	0.247903	4.46925	-4.17706	6.61624	0.598517	0.116617	0.914844	0.913915	0.205409	0.470044	-16.4412	-19.9981	-24.9663	-1.63617	3.67709	0.294576	-5.02535
BLCA__TCGA-XF-AAMR	-12.3632	-3.52783	-0.910849	-3.63265	-0.664866	3.27228	1.62973	-5.65236	-8.92558	-2.07392	-2.01308	0.36183	-3.94153	2.48309	-4.10888	-1.92274	0.318914	13.1928	-2.14138	1.12227	-4.05932	8.94694	-2.99106	-10.3876	-11.8032	-9.80255	-2.87857	-2.24994	-6.20064	-7.5464	-4.80048	0.740877	-1.54161	-6.16038	-6.92211	1.13534	-1.12517	-1.16113	-0.667013	-1.61685	-2.71006	-0.700503	-4.25459	-0.989325	-2.61923	-1.09821	-2.77407	1.46131	-2.04852
BLCA__TCGA-XF-AAMT	-13.1569	-0.658601	3.55108	1.44758	1.58453	6.93122	5.22078	-2.84622	-2.6755	2.36211	0.920858	3.85999	-2.47089	3.96806	-2.54477	-0.851648	1.48469	5.96513	-0.870848	-2.1861	-3.892	0.488049	-2.47491	-6.00804	-1.7936	-0.656854	0.461715	-0.357345	-0.270274	-1.40244	-0.74126	1.52885	-3.49369	-3.27434	-6.85058	1.32201	-1.55919	-2.73443	-3.57785	-0.634595	-2.65155	-2.47821	0.100751	-2.49326	-4.03139	-1.51265	5.54727	1.12674	-3.24564
BLCA__TCGA-XF-AAMW	2.85394	0.38014	3.23297	-0.514193	0.588654	3.50815	1.70493	-1.92178	-2.58416	0.915679	0.263785	2.82797	-3.05958	2.19821	-2.62823	4.72676	7.68839	4.26213	-1.37925	-0.687251	-7.66737	-4.71458	-3.37625	-6.72866	-1.75012	3.94087	-0.14182	-7.13351	5.25043	3.46578	-0.140801	7.4143	0.406516	4.94527	-4.03411	2.28669	0.33965	0.179778	0.272031	0.30615	-0.13413	-0.345695	4.36413	4.23523	3.87073	4.76529	5.2022	7.33452	-1.83835
BLCA__TCGA-XF-AAMX	-20.9586	-1.88249	0.920519	0.843604	7.23299	8.27446	5.67675	3.74291	3.99204	3.13432	5.80914	2.28288	12.1667	2.99684	16.4752	-1.38293	-1.06957	1.63328	2.36779	9.29553	6.96139	0.990292	0.627274	6.22497	6.14342	1.03639	-4.92022	4.959	-5.62628	-6.58967	-4.00657	-1.10806	1.50727	4.20851	2.02447	3.07127	-1.9742	1.81718	3.6127	1.53496	4.99454	1.15904	-11.7223	-11.7288	-17.2713	-15.7275	-24.3089	-10.5087	-10.6836
BLCA__TCGA-XF-AAMY	-4.23712	-2.05602	0.949039	-0.649238	0.752895	6.15399	3.99334	-2.26277	-1.77059	0.22587	-2.18871	1.99942	-1.87948	2.42515	-0.781124	-1.21984	1.12706	6.60716	-0.922102	1.98628	-0.164132	3.39101	-1.15148	-0.502087	-2.33716	-3.36413	-3.00366	1.80361	-5.34363	-7.00562	-4.30966	1.36041	-2.57125	-2.18257	-5.19077	0.965517	-1.86847	-2.27135	-1.68444	-0.550162	0.0935338	-2.01513	-3.11753	-4.33546	-5.66962	-4.1393	-4.5243	-3.0836	-2.94446
BLCA__TCGA-XF-AAMZ	-33.5738	4.45841	6.02318	3.15321	10.6637	12.3369	9.45985	5.89816	4.96787	9.40038	6.53834	7.79111	11.8656	6.33916	17.3809	5.24929	7.51203	1.86005	7.20169	13.2415	12.7455	-9.53478	0.826841	11.3728	14.4355	7.88141	-3.19827	12.4756	1.21026	-0.321254	-0.325208	8.12063	5.27219	8.40533	8.38976	6.36648	5.29163	5.67135	7.5839	5.29858	8.90233	5.34429	-11.8315	-11.8626	-37.0889	-10.8684	-19.493	-8.78906	-10.4665
BLCA__TCGA-XF-AAN0	-16.9374	1.66758	2.40123	0.878234	0.0384448	4.35862	2.97079	-1.25848	-5.49397	1.2577	5.33424	4.2554	-1.97895	4.26246	-0.793339	5.41346	7.51386	9.70612	2.35729	0.339378	-1.13276	-3.766	-1.11637	-8.3441	-7.8743	-6.93169	1.18351	0.546288	2.16898	3.3377	0.310967	4.31132	-1.43602	-1.92102	-5.03333	2.49593	0.547425	-1.14416	-1.75977	-0.599558	-0.717875	-1.37826	-7.21104	-5.15934	-5.24786	-2.85818	-2.69934	1.02398	-4.87912
BLCA__TCGA-XF-AAN1	-35.6601	-1.36245	0.135835	2.06259	10.4902	14.4127	9.94341	6.24586	6.54203	6.5555	0.348826	3.69934	3.77506	3.22043	8.30969	-3.91107	-0.396456	6.25237	-0.776207	12.0335	5.4592	10.1732	-1.4296	3.6748	10.1685	3.13071	-8.58627	5.45932	-5.39897	-7.67335	-3.78408	-1.24542	1.34365	1.62384	-1.42466	3.58997	-3.67326	0.99506	3.15232	0.480373	5.07295	0.122254	-18.0519	-19.0771	-22.8487	-18.102	-29.7971	-13.1642	-14.5659
BLCA__TCGA-XF-AAN2	-11.5578	3.53773	2.37098	5.60107	1.02557	-3.56158	2.84949	5.53079	-0.162494	5.84452	4.89269	-6.98804	6.8966	3.04905	9.86161	-1.73755	0.0481079	0.472624	-1.39297	-6.35552	1.32822	-6.38173	-7.70493	-6.83194	9.03115	5.74479	-27.1917	-5.91753	4.84413	3.55913	-0.408129	-12.1477	-0.774096	-2.06118	-5.33537	2.70737	-1.22382	-0.946343	-1.62269	-0.220389	-0.631703	-1.09047	-15.4772	-5.17799	-6.09738	-3.80103	-10.0314	-0.0910708	-15.2286
BLCA__TCGA-XF-AAN3	-12.9223	-0.360918	3.30044	0.758205	1.38177	5.04512	3.27183	-0.789468	-1.66219	1.78937	0.945404	3.6881	-4.80606	5.3632	-3.82283	-0.485321	1.6169	4.79294	-2.08601	-3.64714	-5.5433	-0.0548742	-2.2106	-9.58323	-10.0125	-8.56935	-0.260259	-1.28864	-0.759106	-3.08583	0.287611	1.28132	-1.09401	-5.11837	-8.0505	2.34662	-1.3504	-1.42885	-1.30568	1.48013	0.297354	-0.211634	0.179638	-4.01988	-2.94675	-2.35547	4.93165	-0.637213	-1.03796
BLCA__TCGA-XF-AAN4	-3.86903	4.25239	5.6464	-9.37111	-7.52163	-5.13834	-5.77964	-9.85377	-8.84872	-8.04977	-12.4073	6.24236	-14.657	1.50974	-15.325	4.17873	6.00412	-1.13035	-7.54464	-7.05898	-10.1977	-0.00999707	-9.03766	-7.58666	-8.98226	-8.13973	5.47818	-7.86419	5.68505	4.33301	-1.74116	6.91103	0.953259	-7.20805	-9.24744	1.07475	5.04645	0.507166	0.445865	-6.50962	-6.3534	-5.99553	5.502	5.50646	6.11521	5.83721	5.93401	8.24295	5.87036
BLCA__TCGA-XF-AAN5	2.66622	-9.35141	-6.77268	-3.29011	0.370931	-5.22407	-5.42596	2.30567	1.64341	-0.0813267	-9.98764	-5.96528	-0.149474	-7.74503	4.10453	-8.42185	-7.61547	-5.80505	-8.61221	-6.75845	1.45433	-5.38438	-9.2073	1.51103	8.61937	3.8415	-23.7745	-0.801491	-10.9531	-12.8784	-4.16571	-9.49586	-6.44494	-7.52474	0.843485	-4.15099	-8.20519	-6.8491	-7.03542	-5.75976	-4.81795	-6.49775	-8.08276	-14.5272	-17.9512	-26.4584	-30.7416	7.22631	-6.86972
BLCA__TCGA-XF-AAN7	-32.7208	2.75087	1.18546	4.24916	6.28834	9.67979	7.80115	2.21915	9.89072	8.41037	7.55931	7.93746	14.8478	4.34842	19.3629	-1.6257	-3.24656	10.5132	4.48045	20.3435	16.5493	10.6947	7.14869	12.7916	10.219	8.05147	3.50399	12.462	-3.24948	-2.84235	0.837471	-2.37613	-4.17588	0.627361	-1.08538	-1.71424	-3.81535	-3.43937	-1.98617	-9.55671	-3.58646	-10.4262	-8.42922	-5.623	-7.776	-8.99993	-15.2273	-5.91531	-7.51873
BLCA__TCGA-XF-AAN8	4.09574	3.47579	6.76172	-10.6261	-7.05239	-4.04877	-4.88344	-9.26795	-10.8473	-7.69097	-5.81626	7.03587	-23.3849	1.27934	-19.9923	5.17735	8.43459	-1.68829	-12.7121	-13.6925	-15.7201	-0.561164	-13.0749	-14.3604	-15.2697	-14.3946	6.41742	-12.2284	6.15034	4.14581	-0.70538	9.04975	6.74684	-7.19954	-13.7764	7.77486	5.74208	6.03463	0.63077	5.60236	1.0949	8.28575	5.0843	4.91122	7.35317	6.3047	6.77101	7.75518	5.63645
BLCA__TCGA-YC-A89H	-15.051	-1.74163	2.07644	0.554471	3.73132	6.57559	4.16817	2.34242	0.10711	2.86047	0.0680596	3.02124	-0.85535	2.06417	2.63847	-1.99018	0.602627	0.139102	-1.65583	0.775446	0.99466	-6.40486	-1.93959	0.134269	3.5745	0.173201	-2.90094	1.12759	-0.477002	-3.60218	-3.28587	1.41598	-1.87828	-1.29578	-3.69017	2.5549	-3.09193	-2.35162	-1.76695	1.41659	2.59033	-0.234166	-7.69339	-9.52788	-9.31399	-5.75474	-7.57983	-2.40485	-6.88796
BLCA__TCGA-YC-A8S6	-10.1231	4.93243	8.49242	0.981467	1.67493	5.49853	3.46974	-1.62005	-5.99201	1.49389	1.51512	8.80294	-13.1862	6.75531	-13.5494	-1.01925	1.80715	1.604	-2.06547	-7.84964	-10.6501	-8.76236	-2.58931	-9.2663	-8.30934	-8.18606	4.73768	-1.07552	6.73568	0.206818	-0.512144	8.76148	-6.74639	-9.79647	-12.2423	0.804635	-2.03561	-7.0966	-7.04551	-1.45364	-7.18835	-6.85455	5.34895	5.10791	5.12077	5.92628	5.68983	1.35186	-2.20417
BLCA__TCGA-YC-A9TC	-31.8461	-3.02855	-1.60266	0.053601	7.64157	12.1872	7.89894	5.94908	5.63075	6.42154	5.5315	2.97894	15.4138	2.06707	24.8554	-1.85854	-3.5277	7.0032	6.26899	23.1099	20.5463	11.0399	-1.50656	6.26607	12.6449	5.84767	-8.70186	6.60208	-9.77	-9.00847	-5.98088	-4.18697	0.854521	4.74681	6.44162	3.04039	-4.24717	1.73927	4.29474	-0.113542	6.5989	-0.0160089	-16.7816	-18.036	-22.2553	-14.6176	-24.6945	-10.3675	-15.1602
BLCA__TCGA-YF-AA3L	-31.4806	-1.85875	2.23615	-1.40849	8.5182	13.2589	8.29367	4.9587	0.565583	4.09997	0.563066	3.2601	0.802092	3.28641	5.37748	-2.83344	0.605814	4.51055	-0.273106	8.57613	4.83741	6.49569	-3.44413	0.476857	2.46282	-1.10616	-5.68151	3.33031	-3.46441	-6.61806	-4.44908	-1.54862	0.953974	-2.51258	-2.97993	5.20921	-3.90538	0.735556	3.04272	0.911789	5.79851	-0.631803	-17.1712	-16.0827	-19.0316	-16.1916	-24.1888	-12.804	-13.1226
BLCA__TCGA-YF-AA3M	-22.4713	-2.92778	-1.74473	1.79738	6.76732	7.14121	4.385	5.42455	4.98676	5.1056	6.54617	0.429244	13.6678	2.5415	20.7062	-2.53404	-4.45297	7.45589	2.01723	18.0119	15.6068	8.54614	0.436205	11.1417	14.3875	8.80284	-9.97199	10.0366	-9.03154	-9.96682	-5.97329	-5.28288	-3.42575	2.96224	1.08217	-1.08649	-6.00166	-3.40886	-1.11608	-2.77402	1.84397	-4.9419	-11.5636	-12.7912	-18.027	-12.9938	-20.8987	-9.25597	-10.9986
BLCA__TCGA-ZF-A9R0	-26.7843	0.38208	4.04403	1.49757	6.65969	9.95687	7.1147	2.3843	0.330058	3.14139	0.489095	5.41589	-2.57072	3.82899	-0.62611	-1.11599	2.82958	0.483578	-2.90212	-1.73953	-1.77764	-5.0255	-1.81993	-8.74248	1.04817	-1.37807	-4.82151	0.110158	-1.10579	-4.13589	-2.60844	4.30692	1.03277	-4.34043	-3.53485	4.00737	-0.508536	-0.046887	1.57133	1.92614	3.61925	1.3856	-9.54339	-11.542	-15.8051	-9.59329	-17.5211	-7.83774	-6.98098
BLCA__TCGA-ZF-A9R1	-37.2857	1.26418	2.43407	2.63917	8.71179	11.0486	8.15888	4.16079	4.82018	4.85354	6.14209	5.37722	4.23977	7.42015	6.95488	2.33783	4.17756	4.64124	3.71882	11.0903	6.18529	2.88245	1.06814	1.57959	5.13496	0.56525	-8.09965	5.34602	-3.72547	-5.83361	-2.71968	4.37147	6.11541	5.6476	1.36113	4.39156	1.9448	6.13595	9.4074	2.82322	5.71396	2.57589	-15.9394	-18.3997	-24.4012	-16.6077	-29.4758	-11.4719	-13.2822
BLCA__TCGA-ZF-A9R2	-34.1829	-2.9456	-0.876023	-0.541461	6.53685	10.7875	6.65939	3.12888	5.22319	2.90591	1.31796	2.53765	7.8645	3.87066	12.6396	-3.77201	-2.89191	5.90137	3.19164	14.5854	9.03097	11.3048	-0.251537	4.24884	8.88601	2.66993	-11.4525	5.83361	-9.26607	-11.3988	-6.31912	-4.39764	1.47581	0.633794	-0.441859	0.334771	-4.21379	0.358236	3.88679	-1.9107	1.2635	-2.00418	-16.5399	-20.3874	-25.5235	-19.3477	-32.9278	-13.6308	-16.8285
BLCA__TCGA-ZF-A9R3	-15.2768	0.57	2.40058	0.814559	4.26323	6.28185	4.89148	1.28551	2.48336	2.3572	0.541886	4.31003	-2.64899	3.40471	-0.56927	0.44442	3.43995	2.21342	-0.996951	0.799957	-1.65777	2.64864	-0.317755	1.03813	2.70042	-0.42519	-4.58462	1.04181	-1.17509	-1.36337	0.627531	2.7184	3.45867	0.427251	-2.15948	5.75156	0.464148	2.42515	5.85457	1.42483	5.28326	1.92952	-6.78515	-7.59864	-12.6341	-5.89578	-15.7084	-3.08849	-4.8923
BLCA__TCGA-ZF-A9R4	-26.2452	3.80914	3.09531	2.23479	7.05981	7.18231	5.43456	4.57119	10.1494	3.78469	4.46509	3.49673	8.90846	5.6794	15.1652	-3.23131	0.680339	-2.47394	-1.08293	6.09455	3.19826	0.617696	0.75827	5.07307	13.2643	7.06198	-1.55685	2.90046	4.37612	3.01437	4.16631	-0.0862662	4.28775	-0.495059	-1.60574	4.97504	-1.3818	2.37572	5.83115	1.45792	5.53234	1.73061	-24.2249	-27.2242	-41.7051	-14.232	-54.3124	-8.08317	-8.53416
BLCA__TCGA-ZF-A9R5	-36.6628	3.66302	2.78593	5.44464	11.8822	10.6191	8.53867	9.83609	11.8446	7.68519	4.80366	3.1025	0.837463	5.83786	5.57483	-1.85749	2.71	-0.336056	-2.12112	5.94491	1.62886	4.44874	-0.420153	3.15419	6.04225	1.02749	-5.67377	1.23213	0.0128745	2.27666	3.92364	1.55366	8.19557	1.65763	-2.76104	8.63423	2.07129	6.34471	9.77326	3.37276	7.6129	4.8884	-33.0675	-37.2803	-52.1078	-42.8734	-59.7351	-11.9155	-11.8441
BLCA__TCGA-ZF-A9R7	-18.3055	4.46988	6.76564	5.3754	4.70042	0.475957	5.50835	5.26225	3.79445	5.89373	4.38929	7.06333	-6.01768	5.41046	-6.78137	4.55611	6.32354	-7.71565	4.04083	-4.67787	-5.68505	-6.26764	-5.46261	-5.7738	0.412625	0.285252	4.33179	-4.59516	6.37789	5.30895	6.45153	6.57844	6.49656	0.372612	3.0851	6.58887	5.0703	5.64855	8.38606	5.92769	8.22061	5.63583	-12.9519	-10.7542	-19.7291	3.77656	3.66195	4.8962	-4.19374
BLCA__TCGA-ZF-A9R9	-16.0892	0.361768	5.57549	0.706592	2.88205	7.74409	5.34981	-1.27584	-2.87057	1.71379	-0.278131	5.47261	-6.18264	4.5714	-5.79103	-1.02761	3.18052	4.18127	-3.59875	-4.98777	-6.24442	-7.57141	-2.46873	-10.5407	-9.69796	-7.8973	-1.3217	-0.661766	0.656943	-1.60213	-0.600061	5.42288	1.20596	-7.07935	-7.16883	3.61681	0.230903	0.158304	1.3972	1.16146	2.27145	0.793123	-6.66078	-8.32473	-5.58168	-7.16119	-8.60333	-6.05277	-6.99112
BLCA__TCGA-ZF-A9RC	-29.378	-3.37367	-0.319269	-0.766626	6.622	14.1307	8.85623	1.67734	1.12048	2.78019	-0.970322	3.75567	6.51602	3.32704	9.30433	-5.83584	-3.63375	9.41577	0.644979	11.8943	7.51512	10.3042	-1.54099	3.0525	5.10037	0.907181	-9.09152	5.54372	-10.0135	-12.2928	-8.38908	-3.86734	-3.33665	-2.99218	-2.88908	-0.597275	-6.99556	-3.1792	-2.33114	-1.51581	-0.0536599	-3.13685	-15.5257	-18.3267	-18.1638	-18.4608	-25.0264	-13.6364	-16.8939
BLCA__TCGA-ZF-A9RD	-14.0894	4.24691	7.07354	-0.0309609	-0.136727	3.67293	2.31825	5.82892	-2.33989	6.83182	5.3324	3.52961	-8.26648	3.95754	-7.74291	6.36135	9.32241	-7.0452	6.56817	8.28826	7.43892	-6.70043	-9.08713	-7.63119	2.36534	5.17683	4.49805	-0.781796	6.13404	4.57836	5.27136	9.28364	7.86402	6.29255	5.6186	9.38883	7.21182	7.9461	8.4933	7.16543	7.00653	7.05897	-4.69726	-3.50617	4.0561	5.83288	5.63659	8.98893	-5.11874
BLCA__TCGA-ZF-A9RE	-26.2324	-3.01125	-1.65198	-0.0537397	4.67864	7.17434	4.31243	2.09932	3.31406	1.22794	0.164817	1.3739	5.55265	3.28958	19.5769	-2.15422	0.0494281	10.7903	2.04129	13.4555	8.29443	15.9186	-1.72806	1.76377	5.87883	1.1844	-10.1033	0.824094	-8.53845	-9.52208	-5.26041	-2.48958	3.51982	4.15763	-1.0256	3.11441	-2.32191	2.83909	5.66265	-0.576204	3.67227	-0.246347	-13.3684	-16.5123	-20.5845	-17.53	-29.4648	-11.0724	-13.6758
BLCA__TCGA-ZF-A9RF	-3.15364	-8.07189	-5.8302	-2.70778	0.864625	-0.337384	-0.401411	3.52842	2.55787	0.569175	-8.34698	-4.94687	1.62872	-3.9	5.26615	-7.98516	-7.02474	-8.00967	-7.08385	0.198297	2.45157	-6.16182	-2.25136	2.82218	9.09552	6.11366	-24.435	0.794966	-10.7614	-12.5682	-3.19744	-9.91478	-5.54649	-6.69895	1.70015	0.401827	-7.43505	-6.12262	-5.91489	-5.93129	-0.0474021	-6.02782	-15.1115	-16.493	-23.8803	-28.774	-31.6342	-4.88026	-8.17944
BLCA__TCGA-ZF-A9RL	-36.5029	-1.22935	-0.911753	0.781957	8.43211	12.017	8.16353	4.98204	7.13745	4.32546	5.81843	3.04509	8.48228	7.78563	21.5367	-4.46001	-2.46993	3.97945	3.31345	13.7089	8.61652	9.78721	0.32249	5.32835	8.31293	1.95539	-8.87411	6.58747	-6.66322	-7.92213	-3.35277	-3.02439	3.06142	1.40094	1.2304	4.07415	-2.57357	2.11511	5.50183	-0.0107887	4.80253	-0.889843	-18.6835	-19.4718	-24.7774	-21.151	-34.011	-15.7246	-15.7733
BLCA__TCGA-ZF-A9RM	-35.2929	-1.08166	-0.358368	2.18999	10.5536	13.3871	9.22432	6.70245	8.38444	4.82692	0.613274	2.74331	7.53186	3.70086	12.096	-4.8002	-3.10797	5.84091	1.08265	12.7198	8.3388	10.3076	0.0669026	3.42812	8.53792	2.06126	-11.0982	5.27192	-8.05058	-9.47874	-4.7344	-4.0462	2.81946	1.06175	-0.109308	3.08141	-3.97148	1.09896	4.65952	-0.224887	3.39122	-0.911916	-21.3774	-22.226	-26.8256	-23.7623	-38.3948	-17.784	-19.4668
BLCA__TCGA-ZF-A9RN	-30.7135	3.88905	4.88817	5.86381	4.73507	3.31673	2.7257	9.98712	9.88341	8.43346	5.83828	6.08391	9.49648	2.70644	15.4938	-0.123006	0.774248	-8.56387	4.87885	9.33653	10.0626	-4.57977	5.0978	13.2961	16.8519	10.7907	-25.5461	9.88399	-9.23911	3.05084	3.63458	0.525988	0.962875	4.69142	7.74894	2.50164	-0.449221	0.553467	2.75052	-0.0576796	3.0384	-4.83458	-9.58543	-4.99018	-14.0348	4.53943	-7.89397	7.23277	-1.37247
BLCA__TCGA-ZF-AA4N	-7.31049	-0.1497	2.30595	-0.199951	-0.524369	-5.29397	1.56401	-1.80502	-2.77279	0.743175	4.6279	3.9346	5.6015	3.53879	9.50414	-2.22744	-0.945004	0.48372	-1.48155	-1.63965	-2.30357	-7.34254	-3.60267	-9.0681	-1.42018	5.24057	-22.0107	-2.40847	0.504959	-0.130248	0.79226	-0.218575	-2.45116	-3.94551	-5.46515	0.887392	-2.85997	-2.23512	-1.39695	-1.56158	-1.30519	-2.6387	-0.213384	4.80302	3.9295	4.76951	5.17514	7.86673	0.584991
BLCA__TCGA-ZF-AA4R	-34.1918	-0.860087	-0.182868	1.98182	5.83091	9.80418	6.25827	1.37084	3.25971	4.44739	7.41105	4.50332	7.35525	5.40555	10.6714	-5.92345	-5.39966	10.6018	2.76891	11.7129	7.21683	12.0102	1.14662	1.1529	4.62909	0.386667	-8.86979	6.66831	-7.23602	-8.35216	-3.57028	-5.67764	-5.45793	-5.2756	-1.82878	-3.1568	-7.57699	-6.38348	-4.35239	-4.0737	-1.87895	-5.60927	-14.5854	-16.5448	-22.1902	-16.2907	-27.1025	-12.3201	-13.1227
BLCA__TCGA-ZF-AA4T	-34.3749	-3.3623	-0.607243	0.554784	8.09073	9.55047	6.17057	5.4192	6.75783	4.42731	-1.50333	1.14864	6.40613	1.75649	20.0849	-2.52185	-1.41231	3.27574	1.24817	11.2612	15.6418	8.41963	-0.921806	4.23481	8.63737	2.59137	-11.6091	4.46017	-8.56323	-8.72101	-5.23941	-2.16085	4.23131	2.15864	1.3861	2.41276	-3.30725	2.34199	6.48156	-0.77768	5.2643	-1.43066	-16.5379	-17.1001	-22.3591	-17.6482	-33.1065	-14.1516	-11.6007
BLCA__TCGA-ZF-AA4U	-33.1383	-2.15292	-0.726258	-0.142078	6.4359	8.83719	4.93931	4.27729	4.23026	3.27398	-0.693203	2.65868	4.54205	2.74589	9.16293	-5.26484	-1.97527	4.34402	-1.63729	9.56425	5.41105	10.9205	-1.95068	2.66201	6.09667	1.58105	-8.64082	2.3557	-6.90158	-7.97845	-3.55489	-3.2482	0.97627	-2.44072	-2.26265	0.708905	-5.11682	-1.45421	1.65979	-1.35585	2.91416	-1.66091	-16.4677	-17.8741	-22.5166	-18.4877	-30.789	-14.4157	-14.436
BLCA__TCGA-ZF-AA4V	-11.1734	-0.0271499	2.98388	0.570529	1.59792	2.67059	1.26844	1.63617	-1.33497	1.64674	5.05943	3.51326	5.61027	3.53632	9.37645	-1.82202	-0.478101	-0.340912	-0.769112	-0.838644	6.54049	-9.89562	-1.07259	-5.72964	10.2463	6.94987	-1.60357	1.22973	4.37029	2.58269	-0.833685	-1.10437	-2.39712	-2.03321	-1.51658	0.241228	-3.35174	-2.95783	-2.65122	0.0874616	2.27816	-1.46154	-5.10639	-7.29114	-9.82449	-6.90579	-11.1322	-5.27049	-4.4278
BLCA__TCGA-ZF-AA4W	-26.9866	-4.4186	-0.673498	-1.07803	6.55675	6.15599	2.44481	4.02131	2.70433	3.73255	-0.0183755	0.264843	3.22538	0.878742	16.2539	-6.8295	-3.59657	4.10826	-1.46008	8.22666	3.96051	2.00699	-3.79343	-0.406897	7.28041	7.78131	-9.15204	1.33704	-5.68461	-7.31497	-5.70296	-5.02406	-3.2134	-3.03278	-1.00885	-1.31446	-7.48606	-4.6704	-2.87985	-3.09385	1.38472	-4.60523	-15.9649	-18.4869	-20.6394	-15.6761	-28.16	-11.1554	-14.7411
BLCA__TCGA-ZF-AA4X	-32.5283	-0.233778	1.14115	2.24607	8.55958	9.0793	6.5472	4.37108	5.18736	4.08058	1.91685	3.09136	5.30797	5.01728	9.06376	-1.48293	1.41713	3.78212	0.76083	9.24967	6.38519	6.90471	-0.22204	0.993697	4.49368	-0.573563	-10.0161	3.12804	-5.5731	-7.42883	-3.14688	0.45934	3.27255	-0.400523	-0.540687	3.62864	-1.85129	1.58916	5.26693	0.770271	4.19068	0.240836	-15.3247	-16.7256	-23.1535	-15.8665	-28.3794	-11.1246	-12.2718
BLCA__TCGA-ZF-AA51	1.38633	4.58041	7.64594	4.87522	4.8403	8.12672	6.80183	5.42005	-1.57921	5.66721	4.85888	8.00274	-3.34191	2.40295	-2.84076	-1.04157	2.18704	2.70432	-3.16167	-7.71735	-6.30069	-7.79838	-1.5315	-5.77586	-0.994507	3.06407	4.48503	0.445038	5.77874	3.90521	0.158098	2.01765	-6.46723	-6.36242	-4.37347	1.18573	-2.43969	-6.9143	-7.34944	-1.94797	-4.65359	-5.99809	-0.641944	3.57968	2.75771	4.38727	4.51798	2.40798	5.19548
BLCA__TCGA-ZF-AA52	-10.4529	-0.532141	2.75767	-0.641446	1.43036	6.62841	4.89472	-1.83364	-7.86343	1.5601	1.91405	4.6399	-3.94447	3.56266	-3.61097	-1.77759	1.0352	5.91243	-3.0534	-3.82637	-3.45516	-1.18571	-2.94814	-9.67275	-9.01911	-5.23231	-0.392441	-0.0868707	-0.608622	-3.20348	-2.59856	1.20654	-5.6197	-10.2024	-7.64941	0.9503	-4.30771	-5.24697	-4.98904	-1.66984	-2.22239	-3.99182	-0.384947	0.261289	-2.25711	-0.595656	5.67686	1.34035	-1.35885
BLCA__TCGA-ZF-AA53	4.70535	-0.0657262	2.47202	0.0132648	-0.566971	4.57811	-5.1534	-3.61466	-7.61797	0.987069	5.21834	4.13522	-8.66884	2.99621	-7.84898	0.867996	2.92723	3.76647	-1.19297	-6.9416	-6.99336	-5.72203	-8.4272	-7.55593	-7.23354	-6.10541	4.37355	-0.0491563	4.7752	3.28064	-9.9681	1.50623	-6.81336	-2.28111	-4.98476	6.98335	-0.137683	-0.840213	-7.50062	0.220125	-0.233304	-4.61128	4.82692	4.97403	5.074	5.44256	5.94111	7.92215	5.85955
BLCA__TCGA-ZF-AA54	2.7453	-9.89437	-6.9336	-4.04015	0.00673571	-1.417	-1.71305	2.15216	1.0444	-0.660919	-9.78511	-6.82655	0.715159	-5.49864	3.89943	-7.1966	-7.12577	-5.38464	-1.7122	0.157451	2.11599	-5.94406	-2.89623	9.72251	7.22237	3.37494	-23.6666	0.316307	-12.1504	-12.7212	-5.26464	-5.87339	0.912611	-5.88278	1.03674	0.975462	-1.46398	0.805389	0.832286	0.0455744	0.579592	0.967167	-5.76014	-12.4033	-12.9856	-25.7368	-26.2577	-2.10559	-7.21724
BLCA__TCGA-ZF-AA56	3.50172	1.53945	3.10222	-0.168599	1.09671	6.24853	4.559	-2.37419	-3.2876	2.44475	6.02017	5.83142	-2.8614	5.18384	-1.25398	7.11062	10.2869	11.4388	7.11479	6.95983	6.9251	-3.56729	-2.07914	-6.55127	-7.2045	-3.52443	4.52483	-0.744626	1.87653	3.67368	0.316806	10.1862	7.42592	6.37937	-1.9218	9.65736	7.59588	7.43995	8.34755	6.87734	6.57818	6.94564	-5.37912	-3.96764	4.72934	-2.09796	5.96207	1.24957	-6.06172
BLCA__TCGA-ZF-AA58	-3.37963	-7.11398	-4.25694	-1.97606	0.253812	-5.38421	-1.31946	2.32387	-0.137896	0.849182	-7.66836	-4.44334	-2.88455	-8.2097	-0.448291	-6.92306	-1.87634	-9.56	-7.78105	-8.1061	-0.806383	-8.53413	-8.83501	0.0319651	2.21968	2.00708	-16.4495	-1.57749	-7.93212	-9.02636	-4.67402	-4.05389	-0.642065	-7.66967	-0.853058	0.467549	-1.97516	-5.5872	-0.873308	-0.449608	-0.310487	-0.630571	-4.57544	4.73181	5.19385	5.88475	5.72127	8.97149	-3.33199
BLCA__TCGA-ZF-AA5H	2.08465	-5.25756	5.75374	4.66859	4.97231	-3.99504	-4.27633	5.88157	-1.98204	4.94298	-5.8589	-6.6574	1.14124	-5.60987	3.16374	0.524052	1.66058	-8.30321	-0.803156	-6.38656	1.17247	-7.23797	-6.18132	1.47403	9.29554	6.53327	3.87538	4.9945	5.19096	4.08404	4.32554	5.85477	-4.55763	-0.299237	0.322984	-3.55965	0.636762	-4.24485	-4.74594	4.3777	-3.27884	-3.36504	-5.98894	3.20855	-1.15651	-19.861	3.61626	5.02707	-10.7392
BLCA__TCGA-ZF-AA5N	-17.1491	-4.3428	-1.05849	-1.71827	4.7158	7.36471	3.63783	3.50524	1.36209	1.33109	-2.12875	-0.260485	2.55087	1.81422	6.08883	-3.23005	-1.40453	1.98493	-2.32192	6.62203	3.2908	4.27748	-2.51043	1.4204	5.62582	0.573688	-8.58733	1.69308	-5.22113	-7.56176	-5.55522	-1.58269	0.218021	-0.499385	-3.12965	4.26082	-4.29048	-0.299361	0.988579	3.93998	6.28218	3.06876	-11.1566	-12.5124	-16.7479	-11.4053	-20.5119	-8.11169	-8.68694
BLCA__TCGA-ZF-AA5P	-14.9647	0.60441	3.52673	-0.243986	2.40492	6.56802	4.95485	-3.15937	-3.02207	1.28689	-0.306363	5.60735	-5.72453	3.06233	-5.42255	1.57807	7.46151	5.29951	0.81601	1.31699	-1.3045	-6.12812	-1.52974	-9.47124	-11.0988	-8.2663	-1.41849	0.992135	-0.167787	-1.52333	-0.407317	8.54639	2.2672	-0.768419	-1.8095	3.87278	2.38447	2.46933	3.37808	0.216708	1.89819	0.392873	-3.51181	-1.10857	4.10761	-0.921388	-5.8421	-1.38513	-0.935567
BRCA__TCGA-A1-A0SB	-37.9627	-1.7142	-2.67096	0.443766	4.38244	12.7002	8.18114	-0.947613	4.84365	0.873443	-1.58627	3.36846	6.81298	3.74834	10.6519	-5.80359	-2.42511	13.1868	-0.241215	13.1854	7.00426	16.8382	0.811791	1.94695	1.813	-3.11263	-10.1875	3.33451	-10.919	-12.5336	-6.17651	-1.81732	2.24821	-1.92679	-3.19176	0.24688	-3.32102	1.05642	2.90793	-3.24516	-1.30392	-2.16522	-10.4631	-13.7274	-21.1227	-16.1384	-27.2115	-12.8102	-13.4955
BRCA__TCGA-A1-A0SD	-7.7552	4.96747	5.90721	0.873994	2.70869	5.79806	4.77598	-7.17018	-2.28156	0.727174	5.40081	5.85612	-5.8642	5.17465	-5.19363	-2.06079	1.79052	4.13394	-1.64629	-7.75089	-11.4689	-4.51395	1.64112	-10.0228	-12.2872	-11.5719	1.37771	0.45754	5.68511	3.75389	4.46774	4.9783	-1.0076	-6.33199	-11.3511	0.717417	-0.700582	-2.18117	-2.14342	-2.49227	-6.32708	-1.44274	-4.00943	-0.910273	-2.93768	0.368467	4.80096	0.709146	-1.96994
BRCA__TCGA-A1-A0SE	-25.3293	6.09197	2.9819	2.98433	4.37851	10.7119	8.55915	-1.53367	1.57033	2.98186	7.28125	7.06882	2.79496	7.21572	3.92302	-5.06752	0.185389	10.4377	-0.824806	3.54457	-1.43001	7.75406	6.42715	0.8762	-1.50822	-2.87193	-2.47901	8.38403	1.30961	-0.49735	4.82189	2.4679	-2.82495	-6.29201	-7.23022	-1.97915	-3.10439	-3.40537	-2.98676	-1.11524	-2.6089	-1.42042	-11.0021	-11.9526	-16.4631	-13.3365	-21.1124	-8.28725	-9.85731
BRCA__TCGA-A1-A0SF	-22.0577	6.62724	8.86483	0.98286	4.35859	8.96342	6.87669	0.599568	-0.190124	2.08643	6.37659	11.4796	-3.7657	4.51553	-1.89919	-1.95196	2.33299	0.533549	-2.08578	-3.97532	-5.80869	-6.99918	5.65996	-5.69842	-6.71553	-3.04611	5.64369	5.45284	7.89173	5.08754	7.03996	7.01211	-0.678552	-6.19964	-8.50332	0.210588	-1.99684	-1.82767	-1.47608	-1.47573	-0.618196	-1.58145	-7.59832	-7.94435	-11.9154	-5.97586	-12.1739	-5.52745	-4.21056
BRCA__TCGA-A1-A0SG	-15.4322	4.35526	6.16229	1.72286	2.78786	5.9721	4.88726	-1.51307	-1.15525	1.72733	5.82594	7.97235	-4.85359	5.03924	-4.56415	5.81194	8.90742	1.32889	5.04697	-5.27512	-3.17257	-7.4674	5.34255	-7.4328	-6.50315	-6.50503	-0.566167	1.61624	5.10942	3.26994	3.90387	9.19105	9.49477	5.79721	-1.05888	8.8066	6.91136	8.26684	9.26405	8.48896	7.47601	9.83909	-4.07532	-6.99117	-10.5317	-4.00363	-7.58601	0.625036	-2.44957
BRCA__TCGA-A1-A0SH	-15.3096	1.92539	3.35625	0.862755	1.93932	8.62881	6.37392	-8.7408	-2.81644	1.26014	-0.487422	6.27658	-6.62595	5.00007	-5.94133	-4.66012	0.746723	6.84859	-4.66762	-6.44019	-9.41116	4.53927	0.65377	-9.37712	-11.8506	-7.89443	0.97055	0.0755147	-0.215617	-1.5277	1.5241	3.36754	-2.26905	-9.44785	-11.0976	0.273942	-4.41115	-3.93565	-3.88377	-1.66758	-3.20858	-0.241329	-4.15121	-2.52848	-3.5691	-3.00498	5.8691	0.786448	-3.59098
BRCA__TCGA-A1-A0SI	-13.4692	6.60688	8.02826	6.95469	1.87727	5.72298	4.60065	-2.30067	-2.4449	1.14302	7.60897	10.4797	-1.47585	8.28547	-8.58686	-1.38609	2.37073	6.89965	-1.55369	-8.55992	-8.49116	-5.17197	6.89877	-7.72506	-8.00667	-7.21915	5.24592	7.02054	7.11124	5.16884	6.48381	3.4818	-6.12837	-8.45436	-7.95237	-5.23108	-1.56013	-1.68263	-6.69395	-6.16908	-5.74161	-6.75896	5.18101	5.4958	-3.27692	4.67027	5.28766	1.19166	6.53148
BRCA__TCGA-A1-A0SJ	-9.9677	1.27545	1.55537	-0.0364809	2.6957	6.82079	4.91939	-2.39269	-0.100344	0.296876	5.30293	4.48854	0.101696	4.5218	1.69679	-3.23316	-0.68811	5.13856	-1.63634	2.26828	-1.72923	3.18402	1.85686	0.68321	-0.171326	-1.62587	-0.82832	2.99445	0.383354	-0.23924	0.101745	1.81987	-4.04953	-5.16624	-6.09447	-0.271656	-2.5981	-3.27389	-3.793	-2.44682	-2.48248	-2.92991	-2.92953	-4.33664	-6.50738	-7.03834	-12.0928	-2.24052	-5.33719
BRCA__TCGA-A1-A0SK	-54.1419	0.207165	-0.401348	4.63986	8.89124	16.0625	11.9278	4.22685	8.37418	6.39151	8.49564	4.76461	22.8569	5.87692	31.5775	-2.23411	-3.51866	14.4899	13.6067	29.6713	23.7277	14.2305	2.31469	6.23931	9.57604	1.72081	-9.87187	10.042	-9.58341	-11.1134	-7.16736	-2.52657	0.975575	7.61367	3.32515	0.621164	-3.38609	1.30185	3.78954	-2.02689	0.652203	-3.16401	-20.6494	-19.539	-30.0576	-17.3645	-29.3646	-9.93554	-18.3772
BRCA__TCGA-A1-A0SM	-13.9578	-1.27132	0.918142	-0.735256	0.838897	7.09153	4.14287	-3.83491	-2.51806	-0.883894	-0.158045	2.83006	-1.5123	3.609	-1.96377	-0.539781	2.43088	4.26062	-2.53855	-2.12903	-5.00648	1.80745	0.740192	-7.75522	-9.01095	-5.59797	-4.863	2.25803	-5.7534	-6.74513	-3.75663	4.51209	0.0384567	-5.8731	-5.62475	2.35435	0.106324	0.832388	-0.634914	-0.922683	-1.86393	0.298847	-6.57103	-5.90124	-7.28594	-1.54935	-2.8901	1.58878	-5.28067
BRCA__TCGA-A1-A0SN	-17.5202	6.56531	7.74461	7.55943	8.50565	11.7695	10.3987	5.89589	5.3878	7.26354	6.28992	9.55786	6.00045	6.70535	7.82781	-0.386727	1.21084	-5.14772	4.44565	-4.36649	-6.20865	-5.00791	7.9974	0.464247	-1.95171	-1.98415	4.8223	9.05843	6.64157	5.07906	6.11571	2.85429	-5.5467	-7.24003	-6.81246	0.877073	-1.86908	-0.93015	-6.1133	-6.35572	-7.09495	-6.89446	-5.93641	-5.25309	-7.52723	3.45827	3.5035	5.70347	-3.90071
BRCA__TCGA-A1-A0SO	-42.9066	1.0444	-2.60585	4.47367	7.71063	9.83893	8.20663	4.20102	9.38803	6.26905	6.11625	2.42846	19.704	3.17997	27.9562	-0.958607	-2.26251	9.75469	11.2806	24.8038	21.7383	10.9357	6.80762	16.7018	17.8282	9.22185	-8.6834	11.9243	-9.32184	-7.17517	-4.51334	-1.47937	2.39627	7.02631	10.7155	0.859815	-1.42412	3.24588	5.0518	-2.92417	1.18197	-2.70239	-17.0667	-14.1514	-23.3884	-14.4183	-26.0891	-7.24957	-13.4518
BRCA__TCGA-A1-A0SP	-16.0695	4.91938	3.85533	2.23498	1.05249	7.04203	5.23462	-2.06643	-0.318337	3.23001	6.79159	8.89231	9.29205	5.31904	13.6682	4.87295	3.70973	7.55622	7.86961	9.13465	9.61286	-4.5446	0.82403	9.63319	11.0188	7.24056	3.98365	8.44908	0.631667	0.354148	-0.451179	7.25835	-4.46953	5.13635	5.90489	3.02855	2.33168	0.947376	-0.617478	0.780406	4.52951	-4.09688	5.02255	4.88144	-4.76097	5.17553	5.38727	8.03364	1.32241
BRCA__TCGA-A1-A0SQ	-12.9012	0.46844	0.725642	-1.02564	1.11568	5.01446	4.1995	-2.75259	-2.10231	-0.091283	0.475821	2.38927	0.0281233	2.99204	1.33862	-3.56031	-0.0142774	4.28375	-2.41194	0.83151	-1.78579	3.83567	0.990928	-0.692788	-3.94704	-4.71812	-2.64222	1.62614	-2.99302	-2.66682	-1.15041	1.15725	-0.298459	-5.4985	-2.87511	-0.607249	-2.90472	-1.59868	-0.432318	-0.212768	-0.00576366	-0.0976012	-3.11836	-2.74653	-6.52005	-3.54355	-8.91777	-1.11294	-2.69567
BRCA__TCGA-A2-A04N	-10.0447	0.18715	1.85979	-1.87336	0.836538	7.16205	4.95421	-5.02782	-3.66169	-1.04287	-1.18388	4.46874	-5.57282	4.46902	-2.51768	0.873342	3.64372	3.7962	-2.16723	-2.20601	-3.08729	1.93033	-0.878077	-8.22392	-8.2775	-8.20688	-3.81838	-0.417108	-4.17272	-4.69614	-2.72155	8.14143	5.27635	-0.468185	-4.03719	3.86423	1.64035	3.65024	5.3071	4.35384	4.28465	5.08873	-5.67006	-6.68641	-7.26613	-3.99469	-5.77482	0.294837	-3.36387
BRCA__TCGA-A2-A04P	-17.0217	3.84222	4.56744	4.74136	1.35089	4.18305	7.10516	-0.689236	-0.319201	5.30704	5.2053	7.45224	4.99408	3.52403	-0.197477	5.15469	6.72311	4.06497	5.51577	5.57399	4.58031	-5.59294	-0.311012	-5.61891	4.18929	3.59704	0.379578	4.80384	1.17654	2.76243	3.38831	6.63645	4.72484	4.04772	3.7461	6.24809	5.79403	5.63118	4.96039	0.222713	3.73496	0.399452	-3.46754	-3.22761	-4.60784	3.67345	3.68869	0.0218327	-2.02765
BRCA__TCGA-A2-A04Q	-33.2728	-3.34263	-1.68958	0.160441	2.09576	1.45184	1.41264	3.207	1.84552	2.88499	-6.37774	-0.411842	-3.23485	-1.86921	-1.23293	-1.1725	0.357986	-5.60705	-1.83693	-2.09073	-1.04297	-3.14916	-0.944142	0.0460226	1.14697	0.625653	6.14433	0.245137	7.31885	6.35337	-0.939336	-1.93718	2.56824	0.0881313	-0.111662	3.61057	0.297795	1.94229	2.18462	2.63646	2.93275	3.01846	-8.26105	-10.6931	-14.5363	-17.311	-19.6282	-1.23227	-4.54748
BRCA__TCGA-A2-A04R	-18.837	-3.09111	-1.4339	-1.5586	5.35932	8.05219	5.3046	0.504879	4.01877	0.500663	-0.779501	0.933123	14.7217	1.8022	12.4552	-5.91007	-4.43018	8.66037	4.4893	14.1267	8.48779	13.6447	0.105478	6.30236	7.31596	2.56361	-10.1803	4.5639	-10.0481	-9.97182	-6.106	-4.67488	1.24106	1.22988	0.363108	-0.716442	-4.59506	-0.693909	1.82978	-1.6617	1.20232	-1.22878	-12.5236	-13.757	-19.8497	-16.5381	-27.1663	-10.3583	-14.6562
BRCA__TCGA-A2-A04T	-18.6902	5.96466	6.14095	8.29007	1.41586	11.4332	10.0068	7.6477	9.55166	8.5716	6.93693	9.22437	8.89592	7.02152	13.1037	-1.73682	0.436667	2.5789	6.75984	6.21691	6.65875	-7.48525	6.90555	10.8308	13.5439	7.9095	4.04057	10.8608	4.88297	3.75891	-0.861948	3.58358	-7.33593	-4.24347	5.06309	-0.37389	-1.37405	-2.27598	-7.74622	-6.12197	-7.30975	-6.27224	-2.98611	-3.38067	-5.72312	0.259181	4.47007	1.48449	-3.2287
BRCA__TCGA-A2-A04U	-30.8793	-2.82903	-0.986318	0.941248	7.99045	14.1762	8.7572	6.23077	6.20316	6.35423	5.27909	3.40935	16.5457	2.07437	25.1817	-6.31472	-6.30493	9.57804	3.92875	16.2368	18.8184	8.96171	-0.373319	6.60329	11.1704	3.96452	-7.6812	9.79874	-9.23216	-11.0863	-7.33382	-6.92574	-5.09023	2.57208	2.67284	-0.773096	-8.5096	-4.51342	-4.60495	-5.92857	1.84482	-7.84507	-16.9244	-15.4181	-21.8711	-16.9681	-23.6861	-12.7433	-16.754
BRCA__TCGA-A2-A04V	-5.959	1.46888	2.94537	1.00475	4.66597	9.08067	6.29232	-0.841753	1.18322	1.31623	5.75655	5.04296	2.64969	4.82596	3.44631	-3.64448	-0.336831	5.91872	0.424721	1.83261	0.339562	5.85787	5.03814	3.1826	-1.62983	-1.75471	-1.66737	4.59471	-1.55347	-3.05637	-1.10608	1.85985	0.376906	-1.87753	-4.82949	0.430302	-2.52961	-0.365664	0.601819	-0.482102	-0.488414	-1.51149	-2.59292	-3.23677	-3.74011	-4.46983	-5.45544	-0.271288	-3.97361
BRCA__TCGA-A2-A04W	-18.3186	-0.724499	2.32798	-1.1591	2.19075	8.79421	6.13018	-1.60172	-4.13454	1.20214	1.65181	5.08989	-1.06037	3.8843	0.383346	-1.79611	0.27535	4.92259	0.186195	1.23575	-0.867077	-1.41337	-0.949325	-8.36944	-2.65573	-2.75683	-2.80363	1.41847	-2.371	-5.04774	-3.76327	0.076421	-6.47835	-6.64776	-5.7778	-0.188078	-3.55361	-5.36668	-7.10572	-3.80022	-5.41822	-5.15996	-1.17143	-3.92084	-7.38432	-4.9774	-7.99222	-3.91492	-4.27545
BRCA__TCGA-A2-A04X	-17.2905	-3.90546	6.27146	4.88182	7.27673	0.547139	7.31186	5.45575	4.82823	6.32383	-5.46887	-2.4436	-0.593801	-2.0826	1.59232	-1.00253	4.99307	-6.42331	-0.949755	-4.25065	0.226565	-5.15059	3.98372	7.31068	7.25564	5.02196	-15.0001	4.84209	-6.94498	-7.74259	5.8339	-2.22156	1.52238	-0.13097	1.19353	6.99107	4.67818	5.33859	5.52119	1.39981	2.07302	1.53448	-11.6564	-9.33631	-18.5493	-14.3492	-17.652	4.17179	-3.96729
BRCA__TCGA-A2-A04Y	1.65537	3.89261	6.17622	0.574249	2.06651	3.89436	3.35066	-2.08735	-1.65475	0.677924	4.28974	6.58415	-1.83847	2.79974	-0.851804	0.577574	1.93822	-7.05408	-0.606246	-7.53256	-7.37977	-7.28329	0.370583	-5.10366	-5.89851	-2.49998	3.34389	1.43639	-8.96698	2.8436	3.21709	6.40359	0.0205151	-4.85515	-6.03178	2.28931	0.691649	0.61575	-1.02411	-0.185401	-4.00907	0.333076	-2.05756	3.65496	2.81263	3.92128	3.94149	-0.31924	-1.6247
BRCA__TCGA-A2-A0CK	-18.5729	4.73937	5.34979	1.34155	5.27754	11.8446	8.35371	-0.275332	-2.27363	2.3934	5.74285	10.2416	-6.29216	4.53888	-5.07705	-4.25242	0.973199	2.5049	-6.761	-10.6179	-10.913	-6.65598	1.43959	-9.35179	-10.7853	-6.32866	1.60119	3.56969	6.28811	0.351848	1.71043	3.35574	-2.68855	-10.8667	-10.2284	-0.360217	-3.858	-3.88801	-3.36616	-2.10018	-1.13957	-3.84063	-4.47441	-3.9707	-5.44351	-2.05482	-2.77958	-2.68564	-3.07162
BRCA__TCGA-A2-A0CL	-16.4636	-1.89045	-0.546939	1.27817	3.53634	2.73754	2.64796	3.95196	3.44931	2.73074	-6.28043	-0.81008	-3.93043	-1.58638	-2.89565	-1.82388	0.72029	-10.0764	-2.96209	-3.28092	-3.01085	-8.07983	1.30811	-0.700941	-0.0833586	-1.97316	5.94989	-0.908986	7.10673	6.70839	8.47166	-0.403087	2.8991	-0.330913	-1.8488	3.65596	0.637003	2.27375	2.39089	2.15032	2.0597	2.81656	-12.3868	-10.3825	-13.2714	-17.0131	-20.9421	-2.60256	-5.88851
BRCA__TCGA-A2-A0CM	-19.3754	-3.93283	-4.37506	6.94376	2.53409	0.321767	0.611479	6.88499	7.11375	2.18852	-5.67829	-2.3717	1.30795	-2.97615	4.43496	-1.969	-2.00357	-7.92619	-0.599142	-0.0231862	1.85986	-7.80736	0.174517	1.77985	8.3805	5.66239	-18.8146	1.54547	-7.81146	4.70096	5.56861	-3.53799	0.229296	0.135896	1.04471	0.373692	-1.03976	-0.0304167	-0.13027	-0.66473	-0.644802	-0.39828	-5.36114	-10.3334	-14.1737	-18.8561	-22.9507	-1.44146	-4.53546
BRCA__TCGA-A2-A0CO	-10.7945	6.5535	11.4529	-0.0820784	1.46059	10.7835	9.35951	-6.35511	-8.22161	-0.755432	-4.91357	11.9241	-25.9751	7.03081	-22.9696	5.14087	8.65086	-10.8506	-16.7647	-19.1739	-20.6725	-9.23833	-4.24752	-17.5367	-19.3103	-19.3904	7.59399	-12.3379	9.7693	6.78796	9.36283	9.38628	11.2637	-11.8657	-17.4385	9.18706	6.22245	7.80615	9.59051	8.03954	1.10073	10.8093	3.90381	3.99433	4.48997	5.2455	5.06882	5.73812	5.34379
BRCA__TCGA-A2-A0CP	-15.3349	2.49552	5.11092	-1.96083	2.75805	12.4649	8.53319	-4.67632	-6.81874	0.85416	-3.12462	9.5345	-14.4157	7.39631	-9.64499	-4.72304	2.55935	4.10084	-12.296	-13.5608	-14.1359	-1.34247	-4.11377	-15.5944	-16.5343	-15.0328	0.730369	-3.41848	2.83591	-1.67839	1.84812	4.70455	3.07326	-13.6697	-15.5864	3.24503	-2.60638	-1.25201	0.88347	1.72425	0.967692	3.11082	-6.58043	-8.50831	-5.9243	-5.2766	-3.22221	-4.71598	-4.26453
BRCA__TCGA-A2-A0CQ	-8.5433	0.863895	1.56124	0.278032	2.18483	6.94055	4.98821	-1.63859	-1.71965	1.04848	5.63873	4.66887	-1.36203	4.55132	-1.10403	-2.75186	0.756915	1.68996	-2.77276	-3.22174	-2.75946	0.994005	-0.431327	-5.89573	-3.72383	-3.51572	-2.90902	0.946785	-5.49382	-5.42112	-2.67084	1.06611	0.735211	-4.70322	-4.15391	0.918823	-1.61086	-0.484114	0.264039	0.949419	2.31176	1.09287	-3.21983	-2.33248	-3.99971	-2.17414	-6.865	1.02377	-1.55261
BRCA__TCGA-A2-A0CR	-23.8978	5.8077	9.53755	6.76266	8.62031	9.75857	8.72057	7.56394	0.192655	8.43914	4.95182	9.50285	-15.5937	6.02044	-14.429	0.685278	5.51402	-10.4165	-1.06065	-9.76528	-11.5631	-9.48491	4.49781	-9.51322	-7.98923	-6.50126	7.35883	5.61238	8.69946	6.43677	7.92935	6.89663	1.60928	-0.967118	-8.16824	3.28185	0.878994	1.41294	1.33789	1.73564	2.08404	1.44574	-6.11502	1.94609	1.83019	3.92784	4.63957	4.09504	2.91222
BRCA__TCGA-A2-A0CS	3.8616	-0.429807	2.96347	-1.55583	2.67202	7.96153	5.58046	-2.28749	-2.84033	0.689724	-0.815853	4.17574	-3.57835	3.89921	-2.15784	-5.58046	-2.20169	4.22637	-6.0756	-7.15354	-6.4569	5.15186	-0.901676	-1.63198	-3.18356	-4.65904	-2.96075	0.468107	-4.20856	-6.74463	-3.32601	-1.05792	-2.29809	-9.82346	-8.14229	0.66532	-4.30021	-3.5219	-3.68168	0.555557	0.52787	0.751468	-1.74577	-3.66194	-5.09333	-3.5079	-3.19282	0.191657	-3.48257
BRCA__TCGA-A2-A0CT	-7.63538	-4.38547	-2.91716	-4.28262	-0.0895337	5.1698	1.98733	-3.04139	0.28023	-2.06928	-0.880731	-1.17574	6.76617	1.69036	11.9907	-4.62161	-2.31278	8.48249	3.2965	12.2468	7.17423	12.015	-0.968353	4.70385	6.58464	1.84299	-5.78919	2.86788	-9.63808	-8.38896	-7.0777	-2.24679	3.01707	1.43063	0.0707666	3.08265	-2.71607	1.23741	3.3077	0.627546	4.82094	0.737192	-7.65747	-8.34687	-10.8716	-9.83229	-15.4062	-4.35999	-9.97074
BRCA__TCGA-A2-A0CU	-11.941	1.38645	2.05444	-0.642055	3.35046	10.2335	7.22606	-3.4721	0.210504	-0.548969	1.59576	5.44569	1.59664	4.78694	2.87773	-0.507599	1.24628	6.36652	2.01427	3.5922	1.38506	5.39447	2.37652	1.65438	-1.80805	-3.77997	-4.75339	3.93898	-4.94322	-6.29321	-3.26914	4.94821	2.3657	-0.558891	-3.359	1.48494	0.9113	2.27804	2.56406	1.43411	0.161394	1.80225	-4.52283	-5.13018	-8.47513	-5.56296	-9.96059	-3.74527	-6.17009
BRCA__TCGA-A2-A0CV	-12.968	4.67105	6.55667	-1.55242	1.31808	7.43387	5.33642	-8.28293	-8.24023	0.891669	-5.01215	9.93213	-22.4872	5.12321	-17.9985	-0.532916	7.87242	-10.0682	-11.8473	-18.3152	-17.8753	-5.83131	-4.21083	-15.7747	-17.0547	-15.419	4.51956	-5.55664	5.42816	3.61705	5.35259	9.37884	6.81188	-12.4013	-15.4392	2.90079	0.999711	1.61308	4.60904	2.11977	7.18726	5.24617	-0.524588	-1.97812	3.68011	5.15994	5.4283	0.195838	0.339128
BRCA__TCGA-A2-A0CW	-22.5866	0.705266	2.40464	2.69997	5.85712	4.87727	4.90304	7.28453	3.69109	3.72166	4.4082	2.31745	7.40457	2.55692	11.228	0.802318	2.45345	2.48612	0.463829	7.08376	6.36714	-1.43521	4.26677	9.01725	11.4176	5.50761	-2.64583	7.2228	4.36217	2.46989	0.683327	1.90037	0.638375	0.993813	-1.7071	2.45435	0.736142	1.19555	1.28069	1.31244	2.05539	1.40071	-10.4946	-6.89127	-16.2155	-7.47981	-16.255	-2.97954	-3.48808
BRCA__TCGA-A2-A0CX	-11.9728	1.49589	3.31788	1.42354	0.980582	5.72061	4.50226	-1.82331	-1.95093	1.77936	5.82151	5.2908	0.122197	4.67361	0.63746	1.48389	3.44021	5.80877	1.4424	-0.493715	-1.83778	-3.82725	1.22894	-0.552344	-2.85908	-2.1032	0.854869	2.32068	0.549351	0.856563	1.20158	2.88013	-1.39514	0.18825	-2.36627	1.65315	0.628974	-0.477176	-1.24374	-1.98143	-2.0584	-0.76872	-5.28192	-1.12877	-2.26579	-2.96579	-5.29575	-2.12842	-2.56852
BRCA__TCGA-A2-A0CY	-39.8881	-5.554	-0.934129	-2.56887	9.24682	16.2688	10.3285	3.28121	2.87605	3.0424	-1.44981	2.05552	8.46164	2.61382	13.0935	-5.36426	-3.13704	10.1623	2.05788	15.9641	10.6643	15.0057	-2.04571	5.10669	6.04061	0.471012	-12.3397	6.02355	-12.791	-14.8253	-9.48413	-4.71103	0.72019	-0.588435	0.1615	2.0854	-5.83377	0.0314403	2.19226	0.127358	4.2166	-0.611028	-19.7529	-21.4104	-25.1366	-19.4406	-29.792	-14.3947	-19.2834
BRCA__TCGA-A2-A0CZ	-13.85	7.36209	9.52715	0.919142	0.635291	9.23227	6.54663	-3.76792	-8.44236	1.38621	-1.55354	12.9148	-14.8366	6.54745	-19.6923	-0.252723	4.32489	4.9127	-8.71967	-19.1223	-19.8045	-6.15174	-2.59742	-15.63	-17.6416	-16.3792	6.74226	-4.01527	8.57218	5.36909	7.46683	9.94047	1.50183	-13.2633	-18.1828	2.72762	0.409333	-0.163852	-1.73548	-0.85768	-5.69447	1.99346	-2.01058	-0.743276	4.91462	5.73694	6.53762	0.966137	0.490829
BRCA__TCGA-A2-A0D0	-20.566	0.0232343	1.09119	2.83198	4.85079	6.71441	4.50737	4.10593	3.30744	5.27404	5.77836	3.92439	9.18646	2.62872	15.7113	0.118396	-0.496867	4.44291	5.80877	11.0684	10.2896	-0.0730851	4.65296	10.8176	15.6864	9.87397	-1.15035	10.7976	-0.539745	-0.708292	-7.4722	-1.87182	-5.53714	5.47719	6.03146	-0.257815	-3.4142	-2.68537	-2.59187	-2.77255	0.434744	-5.98553	-5.33035	-5.7788	-10.2289	-3.12203	-5.03801	0.595781	-4.40514
BRCA__TCGA-A2-A0D1	-40.2474	1.56614	2.642	4.2965	11.3962	16.6105	12.7939	6.85174	7.0031	7.16743	6.26002	6.80366	7.96844	4.83627	11.9014	-1.50673	-2.32571	4.18237	3.61922	10.2438	7.40256	1.51985	3.61075	5.40532	7.64686	2.41771	-5.3864	10.5811	-3.04529	-4.00114	-1.47717	-2.12949	0.797053	3.88977	0.225123	2.54846	-2.09908	1.57134	3.34881	-1.73337	2.33892	-2.53515	-17.8639	-16.0838	-22.731	-15.4046	-27.6811	-12.0152	-13.8278
BRCA__TCGA-A2-A0D2	-21.2198	4.27142	4.09577	6.97208	2.51654	3.69966	3.4693	7.28663	7.97666	8.36457	5.85305	6.38404	8.5596	4.20404	12.7226	0.236076	0.76612	-0.868841	6.6176	8.167	8.57132	-4.53948	6.16083	11.2179	13.9445	9.2667	2.94028	9.93389	4.26458	3.59056	3.98835	-3.07999	-4.96043	4.49087	5.69334	-4.01267	-0.731059	-4.72317	-5.2628	-4.93128	-4.91356	-4.75997	-2.82722	-2.84682	-4.6344	-1.6787	3.4205	5.47081	-4.10268
BRCA__TCGA-A2-A0D3	-23.536	4.73875	5.87027	1.64122	3.56561	7.37243	5.69771	-0.212951	2.5101	2.17125	-1.76861	7.75872	-6.40895	7.26033	-1.55946	3.62643	6.74144	-1.43823	-6.38834	-7.16209	-6.8482	-5.7169	0.249487	-2.80337	-5.75142	-6.15376	-0.413484	-0.72901	4.93295	3.5923	5.29055	7.72745	13.23	-0.4881	-5.46342	9.50875	5.61642	10.0289	12.87	10.2291	10.4244	12.2051	-9.37101	-9.39461	-32.2204	-7.86047	-13.3958	-4.60673	-3.86127
BRCA__TCGA-A2-A0D4	-28.254	-4.26158	-1.0202	-0.985057	8.06798	8.97312	6.24371	2.53235	4.44196	2.15607	-0.887304	-0.00864192	16.1703	1.31777	21.0443	-3.79439	-4.11515	9.93939	4.88081	16.06	16.3032	14.9934	0.810552	6.90034	6.78193	1.75955	-8.99088	5.97794	-10.7803	-11.2164	-6.07989	-4.02979	2.05523	2.89893	2.214	1.20915	-3.29256	1.66514	3.37549	-0.801444	2.23634	-0.850714	-14.9702	-15.393	-19.6399	-17.9023	-27.9693	-12.5356	-16.807
BRCA__TCGA-A2-A0EM	-7.83695	-1.79761	0.0472717	-2.38807	0.307045	5.35741	3.1276	-4.72966	-1.87146	-1.826	-2.89525	1.09834	-0.494225	2.17131	1.56708	-5.45879	-1.38506	6.01456	-5.37708	-1.57087	-2.14234	9.26799	-0.827907	0.459208	-4.88908	-5.80059	-4.76538	-0.243063	-6.81343	-7.29516	-3.73236	0.55698	2.53679	-4.12876	-4.93048	1.84171	-2.52072	0.638503	1.39784	3.25612	1.48018	4.28496	-2.75953	-4.65022	-7.92856	-6.92479	-10.3134	-0.0754876	-2.98374
BRCA__TCGA-A2-A0EN	-6.92051	6.87428	9.16355	6.57247	-0.749896	0.88527	0.548881	-8.31989	-7.19658	-1.76458	6.01592	11.161	-16.3621	7.68997	-15.4063	-2.27916	7.7378	-3.46413	-8.49999	-9.58325	-12.8057	-1.29604	5.52592	-8.23631	-10.7667	-11.3259	7.19168	-7.35952	7.62763	6.42869	8.04743	7.95552	2.30612	-2.21878	-10.6519	2.71151	6.42069	1.5031	1.46805	2.14038	1.07986	2.58143	-3.8896	4.32112	4.14002	5.14572	4.82297	-1.49589	5.96576
BRCA__TCGA-A2-A0EO	2.57035	5.39028	6.65927	0.503364	2.67912	6.65914	5.18323	-7.94758	-6.94646	1.301	1.62032	9.53642	-6.67012	5.77697	-5.18553	-3.68323	0.715134	5.85005	-3.4499	-8.49507	-11.0771	-4.73241	1.72773	-7.99265	-10.324	-9.17526	5.03249	1.26197	6.00801	4.04307	4.4015	2.2659	-3.59399	-9.9004	-10.4553	0.0233401	-3.08469	-3.92164	-4.60287	-3.42227	-5.63164	-2.78475	5.53826	5.14336	-5.44439	5.43522	5.82302	7.63571	6.58209
BRCA__TCGA-A2-A0EP	-9.15574	-3.03996	8.14946	-3.19382	0.197297	1.303	0.766148	-1.10607	-2.53631	-1.34742	-5.68816	8.56078	-17.2378	-1.6219	-18.2382	-1.30739	7.0541	-4.65835	-3.37782	-3.94228	-11.9108	-2.77595	-2.56533	-8.77488	-9.92435	-11.0601	7.02065	-3.98501	7.10312	6.3486	6.72029	7.36662	2.07817	-1.63511	-3.7209	2.61218	0.176393	1.58178	1.66918	2.13289	1.65422	2.62863	-5.8313	-6.04077	4.86344	-10.5325	-11.537	-0.211359	-2.05145
BRCA__TCGA-A2-A0EQ	-26.6868	-2.39653	-0.982365	1.82128	4.02402	3.61255	3.34433	5.09455	4.60978	4.49964	-5.15241	0.229861	0.185146	-1.0118	2.5989	-0.103056	0.589494	-9.56403	-0.404505	-0.398043	1.01491	-7.5919	2.26614	2.59043	3.16507	2.89871	5.21843	2.95395	-7.16949	5.87412	7.32075	-1.57509	2.60705	1.11772	1.50661	3.25399	0.92317	2.23159	2.5634	2.29043	2.85754	2.30814	-8.92403	-12.5345	-21.5381	-20.0666	-25.4706	-1.76408	-5.2708
BRCA__TCGA-A2-A0ER	-11.96	4.19468	1.62316	2.03511	2.10187	6.30182	4.62511	-1.23028	1.74226	0.951809	4.60627	3.41096	9.58128	5.43103	4.58903	-2.77203	0.582253	3.75653	-0.591325	0.177978	-0.242643	5.84461	4.2553	4.216	1.09982	-1.24628	-2.02751	4.1527	-1.29034	-1.46047	-1.05218	3.06918	-0.153836	-1.86857	-3.38436	-0.536736	-2.11499	-1.31707	0.0637851	0.553181	-0.063786	0.0319432	-1.52327	-1.06412	-6.51393	-2.35679	-5.76206	1.68384	-2.03536
BRCA__TCGA-A2-A0ES	-11.8542	6.2104	6.71339	0.931952	2.472	7.35037	5.72267	-8.79774	-6.46781	0.907661	-0.430686	9.89486	-11.1951	7.69871	-15.1155	-3.17681	0.00619568	3.52398	-7.45507	-12.72	-15.1843	0.289458	-0.0143346	-11.8972	-14.5715	-14.6271	5.40319	-1.82019	7.09971	4.5139	6.01647	7.87184	-1.03279	-10.0584	-14.7029	-0.542763	-2.19453	-2.35052	-3.07357	-1.74589	-6.75189	-0.159044	5.35336	5.38343	4.89904	5.39823	5.81215	1.89822	6.31852
BRCA__TCGA-A2-A0ET	-20.3925	4.56869	4.77376	4.89824	7.31037	5.64255	4.97415	2.01531	8.81339	2.28461	4.69537	6.69311	8.38119	6.33735	11.6639	-1.15046	1.99984	-2.46916	1.86448	3.38017	0.835315	0.0272536	4.24047	9.51444	2.82722	-0.0835782	-0.371498	4.66655	3.60572	2.99119	5.02711	6.30664	12.9413	0.737106	4.81742	8.99104	1.23767	5.72602	14.1083	1.48721	8.81881	3.21471	-17.0711	-17.1561	-29.9921	-5.7601	-38.4433	0.584871	-4.93132
BRCA__TCGA-A2-A0EU	-14.4006	0.49635	1.48729	-0.772252	2.37181	5.87818	3.90798	-2.59232	1.6999	0.0218755	6.05066	3.66917	4.81162	7.3938	7.54944	-5.43268	-2.30847	5.22267	0.690214	6.95611	2.89479	5.58621	0.59157	2.55069	1.33544	-2.04121	-5.89403	2.3293	-3.90957	-4.74323	-3.19589	-1.26518	2.36957	-0.182152	-2.91498	0.31641	-3.49561	0.00676653	1.65639	0.539968	1.30486	0.220942	-4.4109	-8.17757	-11.5053	-9.32971	-16.9769	-5.03357	-7.30472
BRCA__TCGA-A2-A0EV	2.89365	5.35188	7.18666	4.37981	4.0279	6.18468	7.65077	-0.349279	-0.242001	2.55636	5.75404	8.21961	-1.94707	6.47788	-1.39007	-1.28502	1.53635	3.91458	-1.93526	-5.75052	-7.38747	-4.51311	5.04545	-4.39178	-6.27146	-2.41799	4.73106	5.4204	5.63096	4.18273	5.31673	2.57099	-1.82881	-6.96334	-7.76714	1.10624	-1.43514	-1.82123	-1.96067	-2.06253	-4.83109	-2.20081	3.89033	4.33402	3.36909	-0.772755	4.20767	5.56829	-3.12439
BRCA__TCGA-A2-A0EW	3.0495	5.61167	6.85771	-0.100628	-5.33031	6.50059	4.66128	-9.60241	-6.8467	0.57241	-1.03277	9.31841	-16.8222	7.20073	-15.8574	3.53802	6.73142	3.0747	-4.46689	-11.3431	-13.7636	0.559918	-0.503575	-12.0953	-15.3287	-15.2171	5.38438	-9.21802	7.02624	4.85832	6.51106	9.22575	8.81284	-8.28094	-12.4487	-0.219925	4.79613	5.76967	7.17257	5.01305	-5.22693	7.34365	5.40017	5.56929	5.3239	5.80086	5.81288	6.99957	6.5026
BRCA__TCGA-A2-A0EX	-10.9662	5.2575	6.43611	0.693007	3.06622	8.73235	6.8308	-2.40289	-2.52488	1.87622	-0.425491	9.81097	-9.29388	6.22006	-4.02054	-0.550132	4.16201	3.93204	-4.50153	-9.96552	-8.0336	-5.67662	0.567402	-8.79117	-8.77215	-7.40385	1.04264	0.207242	5.53875	3.56265	5.14002	8.75222	4.73564	-7.76683	-9.05768	2.76277	0.497282	0.950598	3.51057	2.77066	3.01226	4.95205	-6.29633	-6.64584	-7.27586	-3.74516	-6.14753	0.0816556	-3.16295
BRCA__TCGA-A2-A0EY	-9.02233	5.00166	5.46557	0.563594	0.696111	5.384	4.41187	-2.94586	-1.99012	0.663281	5.65518	7.71063	-1.9273	3.97877	-0.528076	5.14955	8.03405	10.0387	5.80451	5.25804	-0.259358	0.179911	5.17719	0.671867	-1.86739	-1.98566	3.844	2.42646	4.99294	3.90619	4.96138	7.98251	5.8879	4.88059	-2.16615	6.46459	5.65727	6.59114	7.10711	0.723651	5.79383	6.65994	-4.70251	-0.725798	-4.89172	-0.974534	-1.10012	0.17626	-0.976477
BRCA__TCGA-A2-A0ST	-14.3056	-4.09492	-1.99812	-0.472467	2.01981	1.33257	1.12355	2.89559	1.9986	1.87088	-8.37597	-2.02466	-4.59956	-2.93564	-2.90692	-1.47805	0.609793	-5.20611	-2.70253	-1.85969	-2.13072	-2.51651	-1.36312	-0.801893	-0.176813	-2.27112	6.07516	-1.75764	-5.1502	6.83165	1.16299	-1.37818	3.14861	0.117601	-1.20048	3.90133	0.530191	2.47998	2.79002	2.92429	3.21083	3.44939	-11.8971	-11.6052	-15.5077	-19.5433	-23.2039	-1.30142	-5.39372
BRCA__TCGA-A2-A0SU	-23.7973	5.34115	5.68704	1.5384	2.51562	7.00772	5.04568	-1.60116	-0.497599	1.93229	5.56071	8.6439	-0.390152	6.46676	0.501472	-4.06343	-1.94869	5.33739	-1.32229	0.338991	-3.54744	0.877819	5.1568	-5.5758	-3.0144	-3.20851	1.24416	4.9415	5.25183	3.16382	4.44093	1.20562	-5.09857	-6.88066	-7.68141	-1.947	-3.9338	-4.68497	-5.01586	-2.77621	-7.26322	-4.56142	-2.93317	-2.89701	-8.23373	-6.08799	-7.54367	-2.01633	-3.75643
BRCA__TCGA-A2-A0SV	3.56062	-0.56021	3.15995	0.723181	3.01935	5.88317	4.60377	-1.11778	-1.65799	1.26124	0.883695	2.96617	-1.75634	1.42538	-0.995835	-1.71271	-0.80296	3.29584	-2.32774	-5.66982	-5.21971	-4.28343	0.786341	-5.62437	-6.07961	-2.89502	-1.45794	1.55955	-2.10063	-3.17792	-1.5871	-1.1422	-3.42651	-4.5513	-4.58034	-0.416737	-2.74566	-3.35981	-3.47724	-4.34973	-3.94562	-3.76817	-2.46458	4.57257	4.05757	4.38368	5.17486	0.180441	-1.90319
BRCA__TCGA-A2-A0SW	-4.70423	5.61629	7.59812	5.84656	7.3267	0.029819	0.408153	5.83598	1.67617	6.51678	5.98283	-2.07402	-0.179042	-1.8208	1.3394	4.67668	6.89393	-7.0452	5.20481	-0.333671	0.828552	-7.19282	-0.388773	0.727687	1.81082	4.01883	5.04396	0.784804	6.41273	5.44382	6.79726	7.35086	2.06632	0.98444	1.81311	8.04015	5.76369	6.76449	1.93188	2.10457	2.71717	2.11096	-5.19933	-8.98817	-11.4796	-17.0763	-19.3492	-2.17239	-3.7298
BRCA__TCGA-A2-A0SX	-28.4111	6.41992	8.3242	7.5678	1.05595	0.899996	1.24478	1.38314	6.62218	7.9078	6.28753	9.6489	-0.551489	7.19388	0.0667483	5.45783	7.3768	-6.82202	-0.359589	-0.95707	-0.78393	-7.8318	6.8756	0.0853364	0.688061	-0.738297	5.7865	7.56303	7.30835	6.10598	7.45184	7.51422	1.54076	0.359821	-0.29967	1.81707	6.72198	1.43161	1.38224	0.913578	0.110932	1.41192	5.11523	4.76522	3.40571	5.4228	4.86546	7.87002	6.03548
BRCA__TCGA-A2-A0SY	-3.82525	5.87844	7.83416	1.14217	2.2214	6.52619	4.814	-6.19363	-2.02126	1.24678	5.95013	10.1377	-3.01631	7.13161	-2.15007	5.12814	8.08849	5.89614	4.69646	-0.818927	-5.76714	-4.69108	5.60717	-5.28111	-8.17088	-7.44685	5.63027	3.34056	6.69542	4.93805	5.93171	8.96196	6.01803	0.482558	-0.618581	7.9593	6.53812	7.18318	6.49685	5.69334	1.62815	5.82658	-3.46416	4.15671	3.81019	5.0844	5.20969	7.03504	-1.11588
BRCA__TCGA-A2-A0T0	-8.84808	0.697037	1.92199	1.30045	1.36942	5.77315	3.90826	-1.39994	0.378632	2.72971	6.01149	4.72486	11.7928	3.98511	18.4453	-2.28219	-1.62335	6.64608	3.12206	8.0343	12.413	0.604165	-0.702897	2.27338	4.15592	-0.0627734	-3.77672	1.67471	-2.61455	-3.51615	-2.95307	-1.83584	-3.98664	1.1683	-1.3681	-1.63894	-4.48439	-4.57547	-4.79657	-3.86778	-1.64315	-3.87891	-6.68718	-8.6589	-7.50308	-7.3027	-10.5991	-2.16477	-6.93357
BRCA__TCGA-A2-A0T1	-6.48813	5.58437	7.75268	-0.394775	1.58139	1.80721	1.59738	1.86127	0.119185	1.86258	5.55291	8.794	-6.81038	-1.53386	-7.285	4.62701	6.68236	-9.08267	-1.52971	-1.56476	-1.3773	-8.99004	-0.0785758	-0.902524	-0.086578	-0.546318	6.40204	6.31247	7.55614	5.99476	7.18347	6.63701	0.336768	-0.835095	-1.39722	1.20719	-0.503425	0.195445	0.237822	0.949629	0.649866	1.30336	3.85528	-7.74304	3.27495	3.92866	-14.4717	-1.44398	-3.2344
BRCA__TCGA-A2-A0T2	-13.9697	0.166929	2.00396	-0.366762	1.95515	6.90482	4.47256	-1.87252	-3.07152	1.78282	6.0766	4.64504	-1.35465	4.02451	0.205811	-3.91499	-0.49081	6.84432	-3.47719	-1.36416	-1.88144	3.59736	-1.23523	-6.90665	-0.293395	-2.59298	-2.78372	2.03675	-3.22292	-4.0369	-3.3697	-1.26751	-3.64189	-5.91139	-5.40511	0.222185	-4.39724	-4.75856	-5.45215	-1.6659	-0.51849	-2.63704	-6.36706	-5.94719	-7.88472	-6.9544	-9.55617	-2.69931	-5.62832
BRCA__TCGA-A2-A0T3	-34.059	5.3258	1.13211	4.03274	7.82495	10.3231	8.31247	3.3947	6.57948	4.7461	6.69916	3.8362	15.6759	4.53776	21.1577	-4.09665	-4.28737	7.27984	5.71394	16.5884	13.4106	7.44171	6.87011	10.245	8.07016	3.34631	-6.66521	10.7894	-4.12668	-3.79893	-1.06737	-2.84486	-0.331566	2.87832	1.32942	-1.69905	-3.83152	-0.995276	0.967268	-2.61696	-1.79956	-3.48415	-11.5248	-12.2108	-19.9982	-13.611	-22.4177	-9.22326	-12.3727
BRCA__TCGA-A2-A0T4	3.40242	5.29677	7.47642	0.155408	1.82942	6.08619	4.26914	-8.33353	-7.42353	0.980879	6.23768	9.31987	-3.41803	4.45418	-2.36875	-1.31033	1.75783	6.68866	0.0336547	-6.33523	-9.04128	-5.08985	1.57227	-7.49413	-9.70664	-7.92678	4.88223	1.85153	6.03423	3.92758	0.896743	3.91545	-2.23349	-10.2402	-10.6621	1.70202	-0.5743	-0.90313	-7.48498	-1.64424	-5.34096	-2.2678	5.25268	5.58539	5.10809	6.0648	6.26426	8.30846	6.57457
BRCA__TCGA-A2-A0T5	-25.9927	-0.939697	0.678177	-0.600089	2.85201	10.1579	6.72835	-1.67755	-0.478649	0.630174	0.0695569	3.99434	1.74929	4.28253	5.49832	-1.84529	2.66443	9.94959	-1.15897	6.15572	1.94085	9.75775	0.851951	0.351614	-1.82572	-3.46757	-6.18632	4.34583	-6.44826	-7.92765	-4.57704	2.80455	1.82392	-1.86136	-4.79692	2.17637	-0.887039	0.721803	1.58089	1.55908	0.781766	1.8003	-8.18237	-9.75189	-15.4191	-8.40951	-13.6349	-3.07455	-8.10794
BRCA__TCGA-A2-A0T6	-4.90879	6.32205	7.811	1.2521	-5.78765	10.0768	8.71769	-8.85358	-6.20817	-6.30186	-2.49546	10.973	-18.2396	7.78491	-15.6524	3.99668	7.13071	-6.97209	-11.3591	-14.6544	-14.9753	-0.959388	-0.608353	-11.0765	-13.4181	-13.8883	5.66259	-10.209	6.18749	5.25404	6.41743	8.48654	8.89009	-7.02465	-11.6164	7.05633	5.27854	5.86058	7.05062	2.45055	0.83118	8.1851	5.41201	4.93449	4.95861	5.99413	5.84326	7.63327	6.38046
BRCA__TCGA-A2-A0T7	-17.0664	6.19245	4.8214	2.16111	2.10555	9.13349	7.27959	-2.49499	-3.05534	1.97032	7.1416	10.3125	-2.85362	5.59356	-3.27812	-3.27412	0.754725	5.63488	-3.24724	-8.85211	-10.6229	-7.42545	1.55834	-9.92549	-10.1517	-9.57692	1.43825	2.5915	3.43479	0.433571	1.91529	3.24667	-5.7384	-8.52025	-11.4528	-0.860387	-3.25497	-4.70339	-6.77504	-5.58207	-9.36677	-5.90651	-4.19968	-3.1442	-7.64501	0.623155	5.87356	1.12582	-3.31264
BRCA__TCGA-A2-A0YC	-5.72841	4.32649	5.59185	1.68935	2.73825	5.54164	4.74439	-1.11405	0.0272658	1.29373	5.03244	3.62751	-1.57479	5.92245	-1.4961	-1.25757	1.07733	3.39896	-2.23135	-6.13106	-7.28462	-3.38481	4.60301	1.55604	-2.34314	-2.44764	4.06019	3.44049	5.20936	3.52908	4.73241	2.79092	1.38736	-2.96177	-5.43859	0.501731	0.019595	1.03063	1.55312	-0.0555652	-1.06433	0.551988	-3.20715	-1.7176	-3.60207	-1.70824	-3.12187	-0.37443	-3.35914
BRCA__TCGA-A2-A0YD	-3.5023	5.63868	7.59131	1.88928	-4.95095	6.78607	7.65065	-9.19003	-6.70044	-6.00347	-0.535133	9.76838	-14.1108	6.9775	-15.4877	4.17439	7.46521	-0.432766	-7.49475	-10.0697	-14.0325	0.294412	1.79826	-10.5222	-13.125	-14.042	5.22064	-7.4556	6.61523	4.7357	5.7265	8.85941	5.42901	-6.44917	-12.4472	0.905431	5.43395	-0.296566	-0.932316	-1.63443	-5.08256	4.87772	4.84003	5.3425	5.57551	5.91906	6.13751	7.67114	5.40989
BRCA__TCGA-A2-A0YE	-22.8189	0.923674	0.368041	3.2144	4.34661	8.47436	6.23732	0.610917	3.81723	3.76316	6.75539	4.67693	11.9531	4.96148	15.1663	0.0189333	1.41025	8.98608	2.93427	13.399	10.2271	5.45549	1.53556	1.42877	5.10464	0.70036	-5.02706	3.82618	-5.60404	-5.76233	-2.44213	0.507106	-1.60636	1.24914	-3.06561	1.17915	-0.380159	-0.761856	-1.07002	-1.9924	-2.18395	-3.39716	-7.74528	-7.24258	-13.4935	-7.08359	-12.8864	-2.13905	-6.11076
BRCA__TCGA-A2-A0YF	3.36415	0.27795	1.07742	-0.354844	-5.55551	-5.22406	-5.32315	-7.87361	-4.43202	-6.93711	4.3196	0.798923	-1.75331	3.23065	-1.18403	-1.26035	1.31837	7.04138	-1.05665	0.654889	-2.54775	1.26582	3.25084	-4.64543	-6.47991	-5.63556	3.26208	1.74189	-3.09253	-1.50897	-1.61139	5.79662	0.672769	-3.13216	-6.0925	0.381494	-1.19732	-0.587903	-0.0351731	0.0372458	0.457968	0.182678	3.61999	4.12416	3.25544	3.67625	3.80801	6.3607	3.81598
BRCA__TCGA-A2-A0YG	-16.2903	4.12068	1.17786	3.03049	5.30065	5.677	5.43878	0.682271	4.5984	1.78576	5.28593	1.61558	12.2902	3.41994	16.4223	1.37071	1.25044	8.54611	7.39912	13.7113	11.1892	5.67009	6.01043	10.7347	5.4538	1.66156	-5.64105	7.49246	-5.69251	-3.52585	-1.23837	1.97771	1.57129	7.67831	5.78906	1.3252	0.98569	2.10276	3.10661	-0.0906196	1.09247	1.11244	-7.18297	-4.86817	-12.077	-10.4795	-18.2481	-3.85817	-6.00746
BRCA__TCGA-A2-A0YH	-2.65464	4.16368	6.43639	5.16139	7.3984	-4.03145	4.56064	-0.530045	-4.46403	4.9876	4.13045	5.65675	-9.92955	1.63872	-9.09106	-1.49109	6.0245	3.64593	-0.757967	-6.20079	-6.82008	-5.83051	4.38459	-0.336465	-6.55935	-6.51773	4.71278	5.60613	4.93177	3.89177	4.22444	6.07603	-5.78464	0.437537	-7.11497	1.52711	5.00216	-0.998249	0.482232	-5.1305	-5.27615	-5.90982	-6.95471	3.96687	3.70063	4.722	4.83706	7.68917	-6.19411
BRCA__TCGA-A2-A0YI	-6.04245	5.70067	7.19086	-2.75013	-1.71525	0.027525	-0.0499585	-6.67509	-5.84922	-2.58323	4.79973	8.7617	-16.4292	6.73065	-13.5185	-0.885853	7.59191	-2.61884	-8.95698	-11.5589	-13.5859	-0.626483	4.03759	-8.91905	-11.3291	-11.9284	5.31517	-8.83208	5.68952	5.18049	6.52053	8.09105	8.85331	-6.68451	-10.1039	8.30726	6.45487	7.57127	2.37552	6.96452	1.96918	9.37504	-4.94111	-7.41555	3.36325	-13.9289	4.37106	-0.536385	-3.64617
BRCA__TCGA-A2-A0YJ	-10.4921	-3.2544	-1.86712	-0.799901	0.413313	6.33372	3.46875	-1.40511	-0.0142753	0.578885	0.324756	1.90187	11.0177	2.95404	15.4052	-3.46844	-2.19741	6.44307	2.43718	7.27109	6.21523	5.21072	-1.31043	2.02147	4.34414	-0.687839	-9.66995	1.39277	-10.7085	-11.346	-7.67855	-3.00682	-1.13035	1.15496	-0.63104	-0.907112	-4.3667	-2.73911	-1.86208	-0.122348	0.687606	-0.860322	-7.95896	-11.1966	-13.9396	-8.68992	-14.8911	-3.71535	-8.6863
BRCA__TCGA-A2-A0YK	-12.8169	6.94933	9.02309	6.34489	0.131776	1.16755	1.38452	-1.96707	0.00129251	-0.290083	5.13814	10.2993	-15.2249	6.60493	-15.4453	5.62104	7.38938	-3.04246	-1.58362	-8.73727	-12.3624	-1.66388	5.04843	-9.36098	-10.8698	-12.3777	6.57516	-7.02003	8.21901	6.86833	8.54759	8.16969	3.45527	-0.953155	-8.03428	3.37918	6.92107	2.7503	2.78696	2.71489	1.44081	3.13241	-5.33705	4.01917	3.56268	4.9085	4.47639	6.3286	5.57825
BRCA__TCGA-A2-A0YL	-15.6024	6.6275	6.56683	6.46647	3.52125	7.72142	6.27639	-1.11365	-0.478105	2.79768	6.61414	10.3898	-2.71005	8.1135	-2.09714	-4.17505	-0.460737	8.36978	-2.32823	-5.64314	-8.30106	0.823837	6.16931	-5.76322	-8.07618	-7.93548	4.5694	3.9054	6.79157	4.70401	6.55012	2.41201	-6.84687	-8.40402	-10.1824	-5.59868	-4.57141	-5.06702	-7.98323	-5.22868	-6.93886	-6.08915	-2.28112	4.5691	-2.53482	4.60007	4.80036	6.0116	-2.17505
BRCA__TCGA-A2-A0YM	-10.6551	5.09919	3.02217	7.2588	2.47611	7.13907	5.86735	0.745282	6.18795	6.45897	6.18952	7.29331	7.06521	5.16039	10.0401	0.958115	0.377765	4.54096	5.56991	5.34311	2.66803	-4.79764	5.86038	0.855304	6.24571	-3.46703	3.62067	7.58372	0.473723	1.1268	0.11128	2.57495	-6.74838	-3.61215	-4.30021	-4.88836	-0.622399	-5.75692	-6.67723	-5.2685	-6.29948	-6.00526	-5.54885	-4.0643	-4.21346	5.20793	5.19808	7.77928	-5.35592
BRCA__TCGA-A2-A0YT	-14.1912	3.66031	5.40214	1.95384	4.62452	4.00215	4.51825	0.407226	3.22521	1.51197	4.19024	1.78861	10.6329	2.45562	14.3482	-3.23379	-2.51695	2.84777	-0.244186	1.61998	0.844051	2.80348	1.82826	3.94894	4.51558	0.233198	-2.84412	3.01196	-1.7459	-2.09526	-1.06192	-1.18865	-0.100498	0.565535	-1.15008	-0.46456	-2.12094	-0.356004	-0.0648314	-2.24347	-2.55119	-1.54984	-4.81393	-4.10155	-8.21658	-6.87203	-11.8301	-1.25952	-4.42444
BRCA__TCGA-A2-A1FV	-15.4033	-1.2159	-2.02923	-1.62047	1.20297	7.38147	4.41748	-4.98544	3.23362	-2.13256	0.564958	1.7589	8.26606	4.69888	12.1511	-2.73132	1.12036	12.3543	7.0501	16.994	9.84743	14.6428	0.269309	2.60126	-1.92045	-4.29747	-7.57784	2.30896	-11.0479	-10.4572	-6.68039	2.12069	7.26617	3.03084	-0.48691	3.72334	1.34101	6.02627	8.68903	2.21174	1.56895	3.91207	-9.1039	-9.51575	-11.7948	-13.5936	-21.378	-7.41478	-13.1863
BRCA__TCGA-A2-A1FW	-23.9817	4.83152	0.6829	5.68841	4.25486	6.21815	5.67589	0.566177	9.82331	1.94029	4.99653	3.36517	12.7778	6.58444	16.0295	1.59992	2.41367	5.2944	8.14846	14.8844	10.8298	6.3333	6.91368	10.0317	2.46785	0.0406303	-0.964081	6.46297	3.08068	2.87207	3.5461	4.97089	5.77761	5.36493	5.53117	4.22157	3.20374	6.24485	7.89663	1.47855	2.33161	2.91662	-7.23859	-5.20169	-24.5449	-7.28632	-14.4933	-0.893759	-5.37386
BRCA__TCGA-A2-A1FX	-11.7318	4.55764	2.08993	2.20488	1.8275	6.84816	5.65218	-1.09358	0.621943	2.19469	5.08856	4.17277	6.52283	4.24169	1.13148	-1.55319	0.357888	2.89113	-0.323687	-0.91419	-2.31328	-4.6457	4.56257	1.94192	-0.813412	-2.91634	-0.414387	6.68082	-0.573163	-1.1046	0.129791	2.26541	-2.14715	-2.34331	-4.99547	0.254083	-1.19723	-1.17445	-0.663674	-1.82204	-4.9347	-4.88658	-4.68983	-2.15145	-4.65061	-2.93071	-4.96754	-1.45609	-3.10257
BRCA__TCGA-A2-A1FZ	3.62211	5.1091	5.9236	1.46255	-4.15881	6.59591	5.203	-8.77432	-5.38657	0.102598	5.76816	8.21085	-4.86531	7.29144	-11.0289	0.428861	3.07772	8.17193	-1.79341	-7.85568	-10.2273	0.997705	4.40301	-7.94158	-11.8669	-12.1399	4.23458	0.137426	5.2781	3.59302	4.34397	4.56915	0.0564505	-3.7987	-9.69841	2.98849	0.935642	0.989328	-0.295576	-0.664149	-4.38845	0.32855	4.72436	4.67518	4.29569	4.63864	5.05763	6.12543	4.98552
BRCA__TCGA-A2-A1G0	-13.4851	5.44204	5.73228	1.58792	-3.18484	6.64621	7.93749	-6.53361	-1.33129	1.541	-1.44429	8.05139	-9.45991	6.42078	-6.51887	-0.428344	6.0834	1.3782	-5.20426	-10.5553	-11.6921	-4.12849	-0.322036	-9.82499	-12.2066	-12.6084	4.04015	-2.11703	5.56261	4.34333	5.83932	8.20001	9.78851	-5.08603	-9.24786	5.42043	4.8778	7.19268	8.31163	6.16169	0.447216	8.87167	3.89735	3.81107	2.97156	4.36824	4.30788	5.17859	4.51333
BRCA__TCGA-A2-A1G1	-3.24211	4.67108	-4.83097	6.03912	-5.22111	-5.39963	-5.31783	-6.1481	6.87668	0.021144	-5.00908	-3.74603	1.67827	-1.97011	3.95584	4.5318	6.24198	-6.17696	5.76897	1.08066	2.36985	-6.61076	5.13935	1.85806	3.00199	2.47966	3.35473	0.0223702	-8.8088	3.819	4.36928	6.0468	2.54272	1.9941	2.48208	7.03919	5.24398	6.25023	1.99775	6.33257	1.65107	2.44862	4.1611	3.88044	3.20961	4.6058	4.25312	7.23357	4.8379
BRCA__TCGA-A2-A1G4	-12.912	4.50419	0.773106	4.21954	1.53232	5.51656	4.39852	-0.898387	6.57251	1.57994	5.08802	3.6138	11.0646	6.0763	14.239	3.68965	4.79334	2.66072	6.30877	9.958	10.3284	3.12427	5.89651	10.591	3.42345	-0.342931	-3.17638	6.141	-3.59495	-1.41912	0.479267	6.0968	8.47243	7.41802	6.45525	5.48357	5.06828	7.89005	9.44119	6.09493	5.39774	6.92747	-3.75687	-3.7243	-8.69433	-2.96603	-9.18752	0.876644	-3.7716
BRCA__TCGA-A2-A1G6	-11.9223	6.08789	6.61578	0.0705397	-5.94344	8.51329	6.8106	-10.2283	-7.32571	1.13936	-4.19028	10.3195	-16.9881	8.32177	-11.7697	-2.82476	2.33525	3.34301	-12.0157	-17.7297	-17.8156	0.811027	-4.50034	-16.8316	-17.9496	-16.9473	5.51206	-6.17924	6.64995	3.93749	6.02713	3.8317	3.45703	-13.3355	-17.4593	1.97537	-0.680464	-0.565741	1.0218	0.71561	1.44165	3.81025	-2.25125	-3.3595	-2.52027	4.77651	5.58272	0.754492	-1.02137
BRCA__TCGA-A2-A259	-20.2174	5.6218	6.38703	1.59729	-2.97842	9.10051	8.04229	-5.71662	-3.98346	-4.27033	-0.957274	8.84954	-13.747	6.01185	-5.12166	3.7486	6.34383	7.20989	-7.40068	-8.94733	-10.4335	0.0996561	-0.00983078	-8.05717	-9.36061	-9.23938	4.31506	-0.573895	5.58035	4.03145	4.67603	7.97847	8.20843	-3.32486	-7.46827	5.31615	4.57718	4.90296	6.28624	5.4142	4.19426	7.62174	-5.10003	-4.08569	2.77088	3.73578	3.71471	5.06467	-3.95086
BRCA__TCGA-A2-A25A	-5.19013	6.41525	7.46501	2.42825	-5.00649	7.79038	5.72013	-8.60515	-5.98392	-5.28588	6.14267	10.386	-11.296	7.47976	-12.1905	-1.17429	7.05235	10.2968	0.779133	-4.81933	-10.1867	0.762841	4.9512	-8.0899	-10.9435	-10.8112	5.84012	2.93026	6.57877	4.92951	5.9888	8.87546	-6.98269	-7.19292	-11.2066	0.0816652	-1.92283	-2.76855	-7.91153	-5.57784	-5.97457	-6.0787	5.1185	5.9998	5.79882	5.7312	5.87208	6.92506	5.9096
BRCA__TCGA-A2-A25B	-1.1802	3.76231	-4.59683	4.4213	2.18843	-3.352	-2.93764	-3.05945	6.69924	0.945812	4.655	-3.7242	8.01722	3.95245	11.8868	0.34527	-4.39718	-0.916493	4.47914	5.13275	6.94027	-2.1583	6.19411	10.384	8.70405	5.47128	-17.7655	6.70589	-9.44734	2.51449	-2.5992	-3.05067	1.24632	4.17886	4.06274	-2.92844	-0.751456	-1.08941	0.809905	-3.44545	-3.36145	-3.88257	-4.48164	2.94663	-17.3268	-0.741942	-29.4379	4.53845	-3.40022
BRCA__TCGA-A2-A25C	1.52045	4.95714	4.34686	5.25574	2.1417	3.98335	3.38873	-3.62511	6.31176	0.922986	4.97967	3.02929	6.16235	2.60266	6.75183	0.192032	2.38503	6.89372	4.55738	5.31401	1.47922	-3.32527	6.23965	0.172165	-4.47595	-1.50212	3.19852	4.80056	3.90697	3.37183	3.40143	6.11945	6.04811	5.20023	0.885178	2.71032	0.545016	1.30406	5.94867	0.0424089	-2.24794	-0.0910884	-2.19084	-1.45306	-3.34471	3.70435	3.9137	6.51333	-1.47841
BRCA__TCGA-A2-A25D	-21.9917	-4.33849	7.94677	-0.802419	8.78726	1.58276	1.60692	3.40903	1.98634	2.40518	-6.42699	-1.20013	-2.60195	-2.37751	-0.392054	-1.51931	-0.432332	-7.63706	-1.80388	-1.95921	-1.54865	-5.78568	-1.64113	0.144273	0.758315	1.01231	4.88987	0.107846	-7.69471	5.17857	6.91117	-2.21045	1.89257	-0.139789	-1.05185	2.73037	-0.0781371	1.24703	1.44325	1.48566	2.07083	1.55176	-7.85792	-10.3456	-13.2306	-18.7484	-21.7984	-1.87699	-4.88325
BRCA__TCGA-A2-A25E	-9.11282	3.73342	2.08699	1.73634	1.56913	4.00713	3.15254	-1.1962	3.9522	1.48042	4.58005	5.64581	11.3831	5.25172	16.9357	0.272503	1.2237	2.92888	5.8353	10.9292	10.6384	2.73556	4.57138	10.124	3.8154	0.430896	-3.37538	5.36696	-2.65779	-1.21554	-0.94255	4.97244	6.52226	6.83216	5.98864	2.45934	1.12588	3.36088	8.40764	0.968109	1.78615	1.2163	-2.77404	-2.12391	-8.73375	-4.36322	-9.40861	-0.83701	-3.60295
BRCA__TCGA-A2-A25F	-12.5697	-3.92788	-3.95525	-1.32933	1.01746	1.49395	0.961106	1.17687	1.67045	0.356281	-8.9561	-3.18108	-4.27202	-2.5784	-2.35087	-2.24084	0.195578	-5.48715	-3.04789	-2.28005	-1.8749	-2.74069	-0.940049	0.157038	-0.213119	-2.51365	6.9302	-1.69206	-6.84646	6.73133	-0.483647	-0.960895	2.62358	-0.278421	-1.31254	3.60746	0.0615188	1.96451	2.09279	2.54079	2.45064	3.37086	-9.68422	-9.06858	-9.24895	-17.3674	-21.4687	-1.75936	-5.02436
BRCA__TCGA-A2-A3KC	-2.99346	5.17624	4.19992	1.06682	1.07907	4.55432	3.54614	-6.91438	-5.72976	0.919582	5.69863	5.09561	-4.57891	6.77822	-5.20223	-0.92446	2.17111	7.50907	-1.25056	-6.67558	-9.94082	0.655216	4.46486	-7.79807	-11.9327	-11.6323	4.79377	2.09204	2.71646	4.22771	4.85764	8.18175	-3.4606	-7.07833	-11.2045	0.0999518	-1.33281	-2.51521	-7.25826	-1.59288	-5.85393	-2.14238	-2.5519	4.78781	-3.91139	4.78887	5.28619	0.729498	-2.75686
BRCA__TCGA-A2-A3KD	-12.7547	4.86697	2.05017	1.71817	2.4868	7.92354	5.79468	-2.44959	-2.68543	0.938894	6.46448	5.77075	-3.44861	5.9947	-3.47146	-2.03533	1.33881	6.09854	-2.41935	-7.32362	-9.96517	4.21827	5.51579	-7.67156	-9.93288	-9.40299	-0.595748	2.46297	0.175984	-1.57528	0.754919	3.54241	-2.98808	-6.83042	-8.12121	0.121201	-2.03721	-3.00398	-7.24362	-1.52454	-6.02332	-1.44885	-2.29771	-0.0184879	-4.34588	-0.942585	-2.44972	-0.222824	-0.113735
BRCA__TCGA-A2-A3XS	-28.8663	6.23103	3.93814	7.91769	4.84019	12.1133	9.41662	2.36543	0.560118	8.91553	7.67548	11.6786	0.526575	8.87518	0.462902	0.703606	3.15521	2.62022	2.11533	-0.560303	-3.10047	-8.38471	5.84615	-5.63724	-2.14178	-3.16815	1.66258	9.48371	6.32579	3.6311	0.314207	8.16661	-4.33783	-2.12735	-3.55673	0.707414	0.273012	-0.709833	-4.90436	-0.982736	-4.40498	-2.04545	-9.41843	-9.26036	-12.9341	-4.36128	-4.62175	-3.79869	-8.53927
BRCA__TCGA-A2-A3XT	2.37463	0.738343	-4.55298	0.322844	-4.09728	-3.99632	2.68539	-1.95965	-5.01857	0.304545	4.78127	5.46704	0.895576	-5.76307	3.33459	3.50722	1.28113	-5.18327	4.83545	0.0198162	1.96418	-4.95044	-6.78578	0.619859	1.5184	1.78139	3.62169	-0.761532	3.90449	2.83008	-7.78484	-3.20503	-5.11879	0.2744	2.71168	0.709753	0.177792	-4.63168	-5.82178	-4.12763	-4.04562	-4.27169	2.96167	3.76597	3.55785	4.58087	4.79401	6.44659	3.85605
BRCA__TCGA-A2-A3XU	-26.4875	-5.00648	-2.50705	-3.30158	5.45781	10.7255	5.2104	3.22524	-0.0254552	2.79511	-1.43696	2.15685	6.91059	0.66223	13.5951	-6.99869	-5.35691	6.79733	-0.0552917	13.4651	10.4514	5.90897	-4.14016	2.5961	8.19301	3.82395	-9.14071	4.11089	-12.4546	-12.6513	-8.58884	-6.45609	-0.722221	-0.924321	1.41582	2.89231	-8.10071	-2.39567	0.0446238	-0.7452	5.97353	-1.52059	-17.7924	-17.97	-23.6256	-14.6308	-23.2085	-9.77092	-16.7046
BRCA__TCGA-A2-A3XV	-13.6707	-4.68243	-0.384757	-5.40778	5.08057	7.74574	3.20961	4.21759	-2.89338	1.96808	-0.975258	1.25319	1.00796	-1.07655	7.32855	-3.47966	-1.88935	1.41042	-1.15436	4.72406	6.83037	-0.132106	-5.89481	0.353981	4.28264	3.27042	-2.80225	1.67252	-4.98366	-15.7388	-5.63676	-4.1905	-0.781534	-2.31034	0.580921	5.20813	-5.54229	-1.55617	0.27622	-0.355126	7.60276	-1.37165	-14.147	-11.2792	-13.9245	-11.8784	-14.1502	-7.72131	-9.30066
BRCA__TCGA-A2-A3XW	-17.3082	5.74302	9.28928	2.20145	5.50166	13.4128	10.1517	1.79151	-7.65672	4.25788	7.04665	11.6442	-9.39529	8.13491	-8.09361	0.349535	4.9814	4.6188	-8.74935	-14.278	-14.9339	-7.7451	-1.16556	-13.4405	-12.8312	-10.225	5.52818	0.899691	8.36503	3.97294	1.48203	5.93929	-4.37595	-14.1336	-15.3567	2.25919	-1.67383	-2.87383	-4.54237	-1.13971	-2.3788	-3.01238	-5.45143	-4.34769	-5.42788	-0.663106	6.61598	0.104846	-3.46951
BRCA__TCGA-A2-A3XX	-24.8955	4.99766	3.49607	3.31622	3.79133	10.8179	7.87147	1.95555	0.380493	4.30446	6.89172	10.2193	0.999785	5.93973	1.88057	1.43144	3.41018	4.00408	2.49025	2.14689	5.90633	-7.44941	2.15818	-6.73671	1.90358	-1.53101	0.37406	10.027	1.68387	0.566906	-1.61522	7.65015	-1.04047	-0.768734	-1.27041	1.58811	1.4633	0.55858	-4.85809	-1.37787	-1.23621	-0.862795	-8.91696	-6.79263	-11.1673	-3.1094	-5.91423	-1.24418	-7.17607
BRCA__TCGA-A2-A3XY	-19.1166	5.74712	8.16732	6.92947	2.47985	7.60926	5.63956	-1.17395	-1.36253	7.61126	5.98937	10.5345	-8.64752	3.8116	-8.59682	5.49546	7.19223	3.19726	1.81572	-6.79781	-7.12875	-8.48109	5.46636	-7.81427	-6.46778	-5.28564	5.04316	7.54774	6.62247	4.52036	5.01856	7.40678	-5.13884	-6.80915	-7.40323	2.86707	1.59166	-4.87	-5.41188	-5.35515	-5.37886	-5.65794	-3.65477	4.88907	4.34068	6.05014	5.96541	0.62139	-2.31828
BRCA__TCGA-A2-A3XZ	-32.7091	6.0517	8.05754	7.25954	8.89295	11.22	10.4137	7.81768	5.68651	8.78677	5.65022	9.49217	-5.11495	6.37881	-5.8325	6.43273	8.33453	-7.37392	5.72318	-0.477568	-0.553204	-7.21762	5.93876	-1.02605	-4.3493	-0.308655	5.40663	7.41897	6.94463	5.55298	6.59647	8.10645	3.01941	2.0418	0.834947	8.62985	6.74579	7.34413	2.9192	3.0889	3.08786	3.00015	-15.0662	-16.5661	-21.0361	3.641	3.25073	5.10984	-4.81042
BRCA__TCGA-A2-A3Y0	-14.4117	5.48012	7.54853	7.53721	5.81092	9.03723	7.24384	10.8674	1.05206	9.7442	7.13259	9.6626	6.93493	7.26195	10.3069	4.66812	6.53495	3.82235	4.6517	5.3682	5.53387	-6.49567	4.62343	1.30956	10.3763	6.41714	4.18055	9.02545	5.85338	4.15399	4.32365	6.44932	-0.12399	3.25779	-2.47897	2.67391	0.467154	0.534159	-0.328958	0.540232	-0.493805	-4.19521	-9.25097	-6.25896	-6.93991	-1.68482	4.36987	-0.492944	-6.16925
BRCA__TCGA-A2-A4RW	-11.6303	5.82694	7.15192	2.95825	4.21314	8.56146	6.8846	-0.586228	-0.560121	3.09377	6.54222	9.99518	-4.95886	8.36013	-4.22627	-2.3988	2.03531	5.48296	-1.80978	-8.91927	-10.8237	-3.6924	5.72414	-7.8892	-9.55467	-5.69	4.8793	2.95008	7.01036	4.33934	6.17286	4.84983	-0.648506	-5.13394	-10.8807	0.125042	-2.30159	-1.60102	-0.828763	-1.37078	-2.66922	-0.96168	-7.90558	-6.59192	-6.07708	-4.02298	-6.23923	-1.25375	-4.48735
BRCA__TCGA-A2-A4RX	-20.9649	6.24606	7.01839	0.883437	1.06822	5.94679	4.35461	-2.80013	-2.81931	1.89073	6.92812	11.2994	-3.46337	8.3291	-3.30428	5.96424	8.1601	2.85887	6.54255	-0.129718	-4.39221	-9.92555	-0.258081	-9.62567	-8.83727	-7.59351	2.18834	1.8856	7.2612	4.92787	6.44072	9.50563	5.28784	4.34286	-1.47244	6.04836	6.70177	5.92577	1.00774	3.86511	-3.82301	0.576637	-5.27995	-4.53185	-5.05416	-1.52847	5.52683	0.674454	-6.05633
BRCA__TCGA-A2-A4RY	-21.1263	7.02064	8.42726	1.71375	2.16349	8.65365	6.29206	-7.30954	-3.48768	1.32263	-2.27071	12.4807	-16.3073	9.83509	-19.1339	0.0274134	9.61342	2.09228	-10.1485	-17.3774	-18.1355	-6.26487	-2.75786	-16.626	-18.2097	-17.3411	6.00334	-4.32947	8.84109	5.55396	8.76668	11.8326	4.33461	-11.9286	-16.3982	2.62091	2.06261	1.75383	2.48428	2.00403	1.09085	4.94018	-2.69963	-4.14887	-4.6975	0.964895	6.16629	1.37055	-0.793069
BRCA__TCGA-A2-A4S0	-22.4754	-1.60359	1.24203	-2.77923	2.48048	10.1346	6.84155	-3.04618	-1.86277	-1.62172	-3.7497	2.77934	-5.08342	4.17956	-1.68434	-5.24184	0.972506	4.56971	-8.79743	-5.98778	-5.4043	9.62848	-2.45736	-4.13509	-6.92358	-8.50398	-5.25387	-2.49229	-5.90548	-8.06485	-2.88259	1.60415	5.30212	-7.17422	-8.37008	5.13599	-1.39612	2.78377	5.49547	3.1734	2.98956	3.73659	-12.3483	-12.7305	-16.1405	-8.924	-13.5018	-6.29448	-8.95243
BRCA__TCGA-A2-A4S2	-14.1502	4.93085	6.9132	4.97157	6.94173	9.43926	8.51456	-3.20695	-3.70193	4.96336	-1.83263	7.11001	-14.3678	4.59664	-13.6158	-0.415644	0.619449	-6.79261	-8.9355	-12.127	-13.8273	-4.83	0.102399	-8.81301	-9.80556	-8.59857	4.91156	-1.41894	5.69435	4.78411	6.94642	4.60341	0.78049	-5.15429	-12.5141	0.84777	3.98027	-0.300542	-4.689	-4.05155	-3.51955	4.5564	-11.7953	2.48705	2.72336	3.5393	3.89186	5.39633	-2.98598
BRCA__TCGA-A2-A4S3	-17.8825	5.15881	5.19597	6.86008	5.78812	7.51014	6.62761	8.72127	7.73106	8.44447	6.58368	8.131	8.37514	5.83481	12.1568	-1.6115	-0.128667	3.99061	-0.0635277	-0.550718	5.11628	-6.74164	6.69085	11.2926	11.7059	6.98782	3.15655	10.4026	4.224	2.97143	3.77774	1.77946	-2.5285	-2.07991	4.73055	-0.301131	-2.64064	-2.9094	-3.14868	-4.46018	-2.48108	-7.48177	-6.80405	-4.5816	-27.1487	-1.12536	-5.5254	1.46927	-4.22639
BRCA__TCGA-A7-A0CD	-23.6674	-1.24631	-0.848245	-0.760799	2.389	5.18036	3.09152	-1.65402	2.2018	-0.526737	5.10801	1.07539	4.91954	3.08167	6.9408	-5.68313	-1.12284	5.3998	-1.55292	5.14106	2.46414	9.66912	0.648908	3.75739	2.50304	-0.998225	-5.73634	2.56815	-6.50367	-5.9298	-4.24776	-1.13915	3.49988	-1.55208	-1.29357	3.25496	-1.64501	2.38977	5.10659	1.89992	3.7949	2.48204	-11.6902	-10.9599	-14.6785	-14.1678	-22.2138	-7.3779	-11.3441
BRCA__TCGA-A7-A0CE	-13.3395	0.558298	-0.936048	3.08853	5.21367	8.90181	6.72623	1.8238	4.34295	5.08071	6.38326	4.42632	12.2119	3.77339	19.0513	-3.65336	-3.50435	12.6125	1.26418	16.7593	13.6675	8.94448	0.873573	1.70686	3.75215	-0.114707	-5.25337	5.60131	-5.51645	-6.17369	-3.11151	-2.91245	-4.8861	0.477187	-4.31916	-3.17093	-4.78358	-4.3899	-4.88352	-3.10064	-3.21536	-3.60066	-8.59264	-7.99291	-9.27698	-10.9707	-16.1578	-7.74471	-10.269
BRCA__TCGA-A7-A0CG	-6.00653	6.82308	8.12388	5.61317	-0.236879	-4.41232	8.8117	-7.14965	-5.31084	-5.61047	6.1199	10.013	-7.45674	6.85785	-8.07458	4.53943	6.48807	-0.835904	4.75848	-4.49156	-6.17299	0.35041	5.54069	-5.071	-6.91492	-6.69442	5.96122	5.48767	6.81905	5.62377	7.05362	7.12325	2.55265	-0.143089	-5.2121	2.71648	5.89314	6.41196	1.78048	2.04587	1.05286	2.29958	4.72186	4.48476	3.59169	4.46723	4.51729	6.51655	5.8087
BRCA__TCGA-A7-A0CH	-9.79019	-0.694779	0.753247	-1.95447	1.59455	7.1458	4.8032	-4.31947	1.23003	-1.25111	-0.35101	2.29877	2.70396	3.96014	4.33991	-6.30967	-3.02821	6.67081	-2.13431	1.72763	-0.830546	10.8841	-0.442554	0.687494	-3.73952	-5.32976	-6.47671	-0.611692	-7.90009	-7.66253	-3.53978	-3.1217	2.04947	-4.85547	-5.99907	-0.213049	-4.46907	-0.268985	1.32042	0.238963	0.11959	0.897445	-7.48204	-8.11131	-11.2588	-7.78523	-12.4118	-1.14369	-6.21436
BRCA__TCGA-A7-A0CJ	-20.9259	0.640593	1.78185	4.28234	10.4906	10.16	8.44648	6.55209	7.22846	6.43193	5.41942	3.53155	11.4304	6.65476	18.1456	-5.14238	-4.19395	2.10994	1.5257	7.04763	4.45578	0.943144	5.18419	10.717	5.16979	1.08281	-3.29098	8.40389	-1.03119	-1.50987	3.99058	-3.99349	0.578053	0.71937	-1.05566	1.57144	-4.88871	-0.357978	1.528	-2.74821	0.352761	-2.70372	-16.2427	-13.5127	-17.9306	-11.7222	-20.4077	-6.5259	-11.0112
BRCA__TCGA-A7-A0D9	-26.5853	-1.21457	0.555807	-0.502393	6.68983	14.6332	10.3299	-1.21615	3.27302	1.00153	-2.66404	2.67768	2.69299	5.13396	8.09243	-4.65974	0.436983	9.95323	-2.63575	5.43127	2.35673	12.3101	-1.26878	-0.390453	-1.94905	-6.25783	-9.04334	0.33772	-7.60926	-9.28966	-4.4645	0.184224	5.82996	-1.7395	-4.87565	4.79688	-0.762682	4.44052	5.64104	4.046	2.08618	5.49411	-13.6416	-17.1549	-19.5102	-17.8203	-25.1556	-13.1566	-15.4621
BRCA__TCGA-A7-A0DA	-17.7825	-1.38454	-1.24896	0.132624	1.43278	7.53008	5.08816	-3.19823	-1.68972	0.354033	6.28454	2.53686	1.39628	4.62384	2.33192	-1.5322	0.376713	6.77839	1.05737	3.7617	-0.321253	5.21158	-0.88303	-8.61485	-1.58873	-4.07203	-8.08786	1.39323	-7.86425	-9.80877	-6.22038	0.010018	-0.884017	-1.56004	-4.1222	-0.06926	-1.46417	-0.980897	-1.07506	-0.759162	-1.08935	-0.0768117	-4.63032	-7.34565	-11.4076	-6.0729	-10.0986	-2.61205	-5.98178
BRCA__TCGA-A7-A0DB	5.70315	-1.73143	-0.457345	-3.68723	-1.25222	4.96518	3.06086	-6.00182	-4.91973	-2.54895	-2.53954	1.98808	-5.31002	2.42765	-3.98245	-3.00984	0.877181	6.56323	-2.8042	0.282974	-2.25852	10.7958	-1.60191	-7.26911	-10.502	-6.48366	-1.8644	-1.16505	-7.85033	-7.29616	-5.25592	1.77798	1.20834	-3.09727	-6.78183	1.40876	-2.31662	-0.893811	0.208648	1.32867	1.3763	2.911	0.237047	0.634086	4.03735	-0.80129	5.29025	3.44484	-0.420733
BRCA__TCGA-A7-A13D	-14.8972	-6.97196	-3.56469	-2.89551	-0.810253	5.04598	2.01499	-3.79528	-1.75004	-1.35209	-3.07198	-1.07422	4.04436	0.415663	7.74099	-1.85956	-2.08363	12.0738	3.37979	12.8515	8.30748	13.7397	-2.30478	0.212726	4.09678	-0.0449428	-11.8469	1.68487	-13.2307	-14.2563	-9.71288	-2.98882	-0.647377	3.57426	-0.647811	-0.673924	-3.34907	-0.743081	0.504185	-0.805479	1.39803	-0.889169	-7.36513	-10.0856	-13.7012	-10.8573	-18.3096	-4.73469	-10.4097
BRCA__TCGA-A7-A13E	-15.0419	-2.93317	-2.14069	0.15188	3.29086	5.96722	3.9675	0.263963	3.65156	0.821646	-0.711729	0.584393	11.2541	1.63447	16.5999	-4.2173	-2.91044	6.98481	1.42258	10.154	7.2844	9.05785	-1.999	2.83632	5.48205	-0.0732199	-8.65655	0.942339	-10.1419	-10.3111	-6.26212	-2.29356	0.826329	1.52415	-0.433775	0.770867	-4.05062	0.0372091	1.7165	0.708912	2.52848	0.452736	-8.13908	-10.3806	-15.314	-8.96057	-15.6107	-5.04962	-7.32673
BRCA__TCGA-A7-A13F	-7.99366	-2.93458	-1.44296	-1.58556	-0.390029	4.50561	2.29282	-2.76883	-1.78609	-1.46503	0.499523	0.590884	3.02454	2.1904	5.97745	-3.13648	-2.53943	8.96295	-0.105963	5.39054	2.91265	9.44476	0.26498	2.84189	0.649159	-2.20188	-5.70828	2.16379	-9.06707	-9.73654	-6.69766	-1.49078	-1.47334	-0.506694	-2.14376	0.933853	-3.09645	-1.50336	-0.864422	0.744456	0.226911	0.664722	-4.88116	-3.81449	-5.22809	-5.9932	-6.63763	-0.525514	-5.06513
BRCA__TCGA-A7-A13G	-25.628	-5.18188	-1.88475	-4.36757	1.79312	6.65032	3.71105	-4.77034	-0.47255	-3.29376	-5.20283	-1.75805	2.27441	1.50967	5.18575	-5.01636	0.524733	7.67923	-3.69083	3.06669	1.61861	15.6053	-3.17986	-1.35336	-3.32386	-6.5978	-10.964	-2.74376	-13.005	-12.7563	-7.87266	0.0363257	8.07039	-2.02737	-2.879	5.36853	-0.887868	5.55223	7.80934	5.34088	5.80936	6.48725	-11.4281	-13.056	-19.0269	-12.4087	-19.7744	-6.34096	-10.2648
BRCA__TCGA-A7-A13H	-2.86324	5.06014	7.01509	-0.00608596	-3.80337	5.14269	7.82731	-6.62604	-8.04151	-5.27602	-2.66384	8.49114	-19.6322	6.43015	-18.708	-1.35375	7.08254	-7.8758	-13.2743	-16.4413	-17.018	-4.4758	-1.82642	-13.2073	-16.0381	-15.745	6.4968	-10.0086	7.34245	5.31011	6.75815	8.31621	2.48699	-10.2031	-15.1153	0.886384	-0.971329	-1.17622	-0.0657646	0.802152	-4.55597	8.27735	4.218	4.67	4.58611	5.88282	6.32203	7.51149	6.22277
BRCA__TCGA-A7-A26E	-7.81891	4.64048	0.914446	0.140264	-0.766375	3.74376	2.14875	-8.50931	0.237704	-1.61557	5.16891	2.24009	1.04732	4.25652	0.658964	-1.99824	1.8695	5.36575	1.19308	1.51114	-2.16299	11.2971	1.26262	-5.6947	-9.13642	-9.06876	-2.29711	-0.441191	-4.35881	-3.62525	-1.03541	3.62182	3.96899	-1.55678	-5.75563	1.31274	0.965628	2.21563	3.50255	1.38432	-0.616846	3.29292	-0.500982	3.68338	-2.47378	3.76405	3.88819	6.68116	0.361505
BRCA__TCGA-A7-A26F	-2.52825	5.14115	5.87601	6.27792	-5.99604	-5.66495	-5.42246	-8.06352	6.63908	-6.24996	5.41538	6.45736	0.811708	6.0297	-7.00265	5.51801	7.34848	9.42801	7.00292	1.13664	1.14794	1.31745	5.01767	-7.49055	-7.45424	-7.15341	3.96404	-7.09082	5.11191	4.29545	4.80553	7.60705	6.8152	5.4449	0.499539	6.80079	6.28376	5.95287	6.53944	1.45977	0.209802	1.88585	4.91921	5.07773	4.91301	5.75973	5.63303	8.26855	5.73625
BRCA__TCGA-A7-A26G	-4.33237	5.11059	-3.96002	5.01913	-6.0058	-5.02862	-4.97146	-7.4543	2.02913	-1.42523	5.08831	-2.64682	0.178728	5.37221	-6.87407	5.35289	7.04371	0.63923	6.22688	0.706508	0.726606	0.863462	4.70005	0.522094	0.0588228	-5.72921	5.33588	-0.854129	5.53644	5.03207	4.71244	7.70695	2.52399	1.22337	0.305467	2.4881	6.03691	1.98013	1.82501	2.30404	0.988899	2.77104	5.15416	5.003	4.17508	4.81396	4.71436	6.6321	5.45856
BRCA__TCGA-A7-A26H	2.34108	5.01257	5.81026	2.0618	2.41969	5.17158	4.18715	-6.18353	-0.738344	1.08563	5.14822	7.33439	-1.79913	6.50811	-2.71564	-0.524015	6.05283	7.52063	0.199917	-4.52084	-6.09685	0.513638	4.24434	-4.55484	-6.00548	-6.18104	3.80829	1.59536	4.8091	3.39056	4.10126	7.42229	5.52061	-2.56852	-5.8724	1.50168	-0.396539	-0.442635	4.88381	0.0384829	-4.02828	-0.760955	-4.12976	-3.17161	-2.92789	3.85558	3.98667	6.03503	-2.78111
BRCA__TCGA-A7-A26I	3.3495	-0.979818	0.524766	0.398309	-0.224025	4.01167	2.22579	-6.88867	0.277032	-0.680552	5.03813	0.60983	8.36916	2.7322	10.6394	0.702207	3.56766	6.72944	0.809166	10.5868	9.0427	5.81103	0.674732	-4.84418	-1.10753	-2.04055	-5.67276	1.26904	-9.96941	-8.65803	-6.19184	3.03448	0.455766	0.703365	-2.64832	1.28317	0.779855	0.197026	-0.46659	-0.114196	-1.2821	0.775097	-3.22099	-3.13014	-4.28775	-2.84512	-7.23822	1.22818	-5.05019
BRCA__TCGA-A7-A26J	-9.67107	4.15944	1.78126	1.76477	2.14935	4.16245	3.03841	-4.91219	1.37724	-0.183509	4.03438	1.13795	0.2289	2.45088	0.783453	-3.8887	-1.35973	4.47086	0.208425	0.903203	-5.46601	5.98722	5.0491	-3.77606	-4.78971	-2.47488	-3.45796	4.09135	-4.05973	-3.05376	-0.153869	-0.391609	1.48906	-1.51335	-6.51746	0.478543	0.0798267	0.556954	1.24134	-1.90568	-5.61957	-0.139891	-4.55974	-2.50223	-3.31334	-2.88892	-6.9861	2.04385	-2.78982
BRCA__TCGA-A7-A2KD	-17.8367	4.85981	5.09772	4.99937	2.37029	4.914	3.97455	-0.714793	5.11226	1.67393	5.02683	5.9332	5.66809	5.67004	8.1539	-0.0478269	1.99475	3.46219	3.37842	0.398562	0.863797	-3.08773	6.39716	7.00092	5.75578	-1.31171	3.50799	6.73855	4.4221	3.75566	4.67554	2.25932	-1.82321	-2.00606	-5.6284	0.894005	-0.69565	-1.2196	-1.55674	-2.34252	-4.90695	-2.36076	-6.03677	-3.73279	-5.66223	-1.3691	-5.09949	6.53566	-5.03741
BRCA__TCGA-A7-A3IY	4.56426	-1.83453	0.314854	-3.85019	-5.27549	5.5093	3.00105	-7.04587	-9.14775	-0.280845	-1.27192	2.82021	-13.0292	1.79885	-4.62412	-3.22936	-0.0978285	4.28042	-4.63586	-9.35903	-9.84449	-3.66023	-1.70756	-7.44407	-8.52129	-6.7019	4.24921	-0.712141	-3.09584	-4.18854	-2.22241	-0.942484	-1.81363	-9.7989	-7.93615	1.06772	-2.44465	-1.93911	-7.68829	-3.02986	-1.59025	-2.20918	4.81564	5.09281	5.1425	6.01778	6.38085	8.89859	5.74431
BRCA__TCGA-A7-A3IZ	-19.0534	-1.15632	-0.590569	0.374204	3.23315	6.84517	4.90671	-1.84507	4.44167	-0.298115	1.03118	1.22938	6.66467	4.66924	8.91846	-2.31659	-0.369004	8.31321	1.65835	7.40368	3.12757	13.6656	2.90525	7.15952	0.864164	-1.90767	-5.78542	3.18643	-8.03469	-7.7185	-3.33982	-0.857565	4.08598	1.53868	-0.640066	3.24709	0.156894	4.21762	6.15901	0.651983	1.22574	1.69598	-11.1588	-8.81394	-13.542	-10.5187	-18.8973	-3.09031	-9.3676
BRCA__TCGA-A7-A3J0	-28.2347	5.84184	4.75319	2.16947	4.4029	10.0342	7.5316	0.306019	0.329769	2.87666	7.2947	7.33195	0.717216	8.86639	1.21654	0.511764	3.92135	4.99475	1.84041	0.654584	-2.34356	0.044488	2.34219	0.0345162	-0.745057	-2.60353	-0.318631	4.52002	0.793268	-0.0403626	1.60552	6.25494	2.14665	-1.65395	-3.78829	3.28445	0.432071	1.036	3.20829	2.90721	3.26146	2.95242	-9.93784	-7.10435	-17.6388	-4.44265	-10.9402	-1.4575	-2.34773
BRCA__TCGA-A7-A3J1	-10.8684	6.26999	8.25827	6.11341	1.99462	10.4094	9.49512	-0.135223	-4.65661	5.58513	4.56475	8.66438	-15.9018	6.19275	-16.3652	4.25145	6.76587	-6.97132	-8.17046	-11.5192	-13.707	-5.30935	4.73854	-10.1887	-12.0583	-13.0098	6.1453	-6.93929	7.4902	6.30213	7.98724	7.69204	7.23458	-0.893435	-9.85315	8.3798	5.78141	6.65823	2.54377	2.57311	1.49092	6.90599	-5.25854	3.35402	3.03595	4.547	4.54242	6.5315	4.57437
BRCA__TCGA-A7-A3RF	-34.1196	-2.35922	1.68313	-1.75186	8.80554	15.9582	10.9019	2.35905	0.740019	2.63901	-1.23635	4.5257	0.23364	3.8189	4.77669	-7.16959	-2.79025	7.81243	-7.05205	1.21035	-0.75937	11.5866	-1.4642	-1.89464	0.0498997	-3.32926	-7.07605	2.20104	-6.42972	-9.46933	-4.56022	-3.46295	1.19483	-7.97079	-6.28759	4.37183	-5.72992	-0.155303	2.19093	0.324109	2.41777	0.113925	-21.0971	-19.381	-20.2928	-18.2073	-26.107	-13.4739	-17.6896
BRCA__TCGA-A7-A425	-3.9699	-0.899417	2.24362	-1.75898	1.77653	6.45657	4.91666	-3.54958	-8.93636	-1.00776	0.667088	4.56016	-7.48003	2.81621	-7.42469	1.23419	4.30695	7.48212	-2.09712	-3.67461	-5.59274	7.82238	-0.690175	-9.97401	-11.1256	-8.54644	1.72985	-0.247623	2.11363	-1.57013	-0.306657	3.65148	-3.90625	-4.37806	-8.16735	0.214558	-2.01974	-2.81506	-4.13353	-2.90385	-2.2904	-2.90908	-2.65753	-1.02843	3.888	-1.00684	5.71404	-0.238335	-1.83979
BRCA__TCGA-A7-A426	-24.2207	6.31669	6.01333	2.21277	4.55608	10.8374	8.45306	-1.29803	-3.56633	2.51673	1.07054	11.619	-9.39274	7.14286	-9.01884	-0.976053	4.93006	5.55227	-5.39043	-9.24472	-12.9652	-6.48745	0.543941	-12.4262	-13.5392	-8.70507	2.3643	1.18414	8.22518	4.29354	6.05023	6.78873	-0.196733	-8.43594	-11.0588	2.60379	0.188211	-0.44292	-1.34071	-0.956567	-1.3096	-0.111451	-8.13239	-7.77699	-8.60637	-7.05779	-10.9525	-5.46576	-5.84802
BRCA__TCGA-A7-A4SA	-7.42468	6.35061	8.24347	6.61805	7.58161	10.4242	8.7968	4.94111	3.97515	6.75685	6.24587	10.5307	-6.4385	6.99317	-8.54398	4.62915	6.14353	-7.30575	1.23365	-7.68687	-9.16925	-6.90616	5.93588	-4.72216	-5.85881	-6.03595	5.87696	6.08548	7.19463	5.39365	7.06089	6.97437	-5.41049	-5.45216	-9.00076	0.825744	5.06478	-5.23105	-5.96076	-4.56497	-4.60645	-5.43916	3.45532	4.03009	-3.7627	4.55341	4.44259	5.91619	4.94824
BRCA__TCGA-A7-A4SB	-28.3452	-2.06061	0.434396	-0.913481	5.5099	10.3737	7.06622	-0.657404	2.48145	0.456073	6.59111	2.50247	5.31776	5.08754	6.30187	-4.77792	-1.41727	8.69072	-1.54637	5.86866	1.57345	12.1492	0.62974	1.89327	0.506643	-2.2607	-8.40212	3.49253	-6.17711	-7.9771	-4.16677	-0.931221	0.424741	-3.61227	-3.53374	-1.117	-3.10066	0.388361	1.11041	-0.264431	-1.01103	-1.1481	-11.5522	-10.9395	-15.8173	-13.4174	-22.1587	-9.73621	-11.0517
BRCA__TCGA-A7-A4SC	-13.8032	5.74238	6.72771	0.145726	2.10578	6.31419	4.96055	-2.97361	-3.42467	-0.429519	0.548364	9.08579	-9.16404	4.99443	-8.94096	3.85945	7.47068	4.38451	-3.27771	-9.78366	-12.473	-3.39123	1.53527	-11.0175	-12.6221	-12.3148	4.55336	-1.82182	7.01103	4.79639	7.03808	8.83175	7.65646	-4.01174	-10.9608	6.3277	4.94275	6.57825	7.55828	0.416572	0.22124	2.79811	-1.86758	-1.84617	-2.51112	4.94003	5.26141	1.73137	-2.31011
BRCA__TCGA-A7-A4SD	-25.1136	5.08926	6.24821	6.92059	6.20364	8.51944	8.37454	5.03226	5.65893	7.25846	6.17671	8.29815	6.20398	6.57964	2.29981	4.70758	6.87756	-8.99461	5.25919	-0.596469	0.387708	-6.89269	4.85146	0.0362987	2.04249	1.73	4.26726	5.28897	5.88872	4.55881	5.43487	7.28314	0.405619	0.741435	0.621989	5.63609	5.33111	5.19289	0.306232	0.475141	0.048836	0.426819	-4.80607	-2.50161	-3.06367	4.29632	4.48718	5.88272	5.19846
BRCA__TCGA-A7-A4SE	-17.9632	2.80726	3.37815	3.03776	1.93113	8.24968	5.99573	-1.55905	-1.44861	3.07756	7.31749	7.47545	-0.148111	4.96421	-0.135614	0.463357	1.18266	7.38084	0.528331	-0.175947	-3.04732	-0.193863	0.691598	-7.75879	-2.69052	-3.57313	-0.878675	2.20386	-0.466146	-3.68089	-0.883344	2.46374	-5.13787	-1.73824	-5.47231	-1.32246	-2.61449	-3.93041	-5.26842	-3.94209	-8.0631	-5.54622	-3.77978	-1.17805	-5.40801	0.420302	5.96243	2.55641	-3.39771
BRCA__TCGA-A7-A4SF	-21.5163	4.22257	3.25826	3.1493	7.50879	8.44826	7.6009	4.71914	4.16798	4.88212	1.42245	5.68854	2.48281	3.24123	4.1261	0.644815	2.67165	-0.0907448	0.863337	1.82381	0.381194	-7.06853	5.65289	4.18904	4.6802	0.675306	-0.251089	8.67781	1.96385	2.93353	3.60102	3.64389	2.90318	0.474254	-1.04434	3.82582	0.483264	2.63303	4.29585	2.37238	3.72421	1.98564	-12.8146	-12.5161	-18.0677	-6.93188	-14.7875	-4.03757	-7.00073
BRCA__TCGA-A7-A56D	-11.8862	-2.95752	2.46028	-2.89055	5.32627	9.53415	5.36387	2.63429	-6.34698	2.94249	-1.06216	3.75339	-7.48598	0.822626	-4.87519	-2.25683	1.06626	2.05494	-4.40933	-6.47742	-4.14446	-8.67722	-3.88997	-9.43047	-3.41255	-1.899	-1.45802	1.20221	-1.88838	-4.70082	-4.01448	0.177275	-5.40449	-8.96809	-5.85706	2.25768	-4.52679	-5.74858	-6.13688	-2.30221	0.293074	-3.9542	-8.30091	-8.4645	-7.01757	-4.80446	-2.39446	-4.14821	-7.89001
BRCA__TCGA-A7-A5ZV	-13.0148	-3.12783	0.688882	-1.60607	0.125029	5.50697	2.90864	-2.90259	-3.88357	-0.934248	-1.05236	1.68289	-1.63184	2.58423	-1.40773	-1.19499	0.691658	5.33163	-1.21336	0.134073	-1.21598	3.01985	-1.81354	-8.14422	-3.10436	-3.91706	-3.17908	0.16111	-6.76622	-9.14038	-6.47454	1.23798	-3.01	-3.7526	-5.04462	0.769965	-1.70412	-2.72486	-3.28888	-0.488204	-0.483236	0.132305	-3.3803	-3.4996	-3.58759	-0.882967	4.85881	-0.195312	-4.30207
BRCA__TCGA-A7-A5ZW	-12.3163	5.93914	7.27899	0.637961	2.61928	8.50192	6.25593	-2.6072	-3.16357	1.99884	-0.87726	10.5085	-9.94584	8.73364	-5.83869	-5.75715	0.44849	4.55778	-9.64435	-11.4961	-11.9531	-2.8823	-1.29621	-10.8132	-11.9549	-10.8711	5.13226	-1.18649	6.38072	3.66424	5.35196	2.84486	-1.0401	-11.5972	-14.4548	0.386415	-3.08469	-3.17921	-3.52336	-0.555592	-2.08311	0.874239	-3.15778	-3.32227	-5.2893	-1.12708	5.20547	1.60404	-2.23656
BRCA__TCGA-A7-A5ZX	-21.2485	-0.13644	1.72009	-4.01448	0.295158	11.7855	6.88953	-6.17677	-7.06536	-1.81814	-4.47762	6.03607	-11.8713	6.51395	-6.28476	-6.54719	1.45215	7.62757	-11.9528	-5.09818	-9.33568	9.9374	-5.26917	-15.575	-13.6809	-12.8998	-3.49578	-4.44579	-3.97573	-7.21088	-2.4607	2.91727	3.72879	-12.5792	-14.6525	3.89273	-2.91206	1.19104	2.57181	2.39232	1.74943	4.43397	-12.4587	-14.9804	-13.5267	-10.657	-12.5924	-8.67379	-10.5833
BRCA__TCGA-A7-A6VV	-20.7438	4.53298	3.17152	1.20244	2.11312	5.34514	3.80965	-1.29388	-2.25574	1.91487	6.7739	7.46125	-0.371974	3.71223	-0.752273	-1.89446	1.20433	3.24009	-1.22074	-7.15826	-6.03549	-6.52869	-0.715093	-7.84363	-7.11816	-6.10959	4.07118	1.8832	2.45028	0.673539	0.0474875	1.62906	-7.74473	-6.45567	-5.08011	-7.01125	-2.97414	-8.34748	-8.72074	-7.0904	-7.783	-8.0655	-6.07877	-4.66924	-5.93587	5.37372	5.79966	-2.05702	-4.73327
BRCA__TCGA-A7-A6VW	-15.5467	-4.31453	-0.454497	-1.34112	2.56428	4.80686	2.81761	1.82742	-2.55638	2.25136	-0.00984802	1.50439	-0.196393	0.454966	9.55324	2.01525	1.54785	6.79644	6.35897	10.188	9.54589	3.06203	-1.66566	-7.13697	1.9435	0.514466	-2.77129	1.51977	-5.46463	-6.66858	-6.09528	-0.420866	-2.26591	5.83723	-0.909752	2.35708	-0.697299	-1.59592	-0.585122	-1.17944	3.01432	-2.43397	-3.81031	-2.74784	-5.3819	-0.622085	4.56914	0.26963	-3.82463
BRCA__TCGA-A7-A6VX	-12.1754	-0.852018	1.00342	-0.752893	3.22639	8.27623	6.19982	-2.22421	-0.43377	0.128562	5.74036	3.14477	1.62858	4.7523	2.67699	-5.76963	-3.77744	4.64477	-2.99226	0.236025	-1.46054	6.48054	0.964064	0.744542	-2.17525	-3.51063	-5.21881	2.57149	-6.41678	-7.73145	-4.06772	-2.55187	-1.7668	-4.87238	-3.50626	-0.374455	-4.84624	-2.75889	-1.93612	-2.08259	-1.87375	-2.39504	-11.0515	-10.8207	-11.6738	-10.3481	-14.8016	-6.09716	-9.42948
BRCA__TCGA-A7-A6VY	-15.2179	4.39224	6.5179	1.07899	0.457194	3.91443	3.3133	-1.48526	-1.63159	6.28929	6.05076	7.74932	5.60022	5.86822	2.67818	4.5728	6.5947	1.53679	5.32882	0.0397958	1.40549	-6.80489	-1.74651	-7.77849	6.71043	4.43261	3.97039	-0.844181	5.23705	3.75134	4.29923	6.89128	-2.91417	3.07617	-2.74121	3.87849	2.47771	2.06775	-3.29464	4.04431	-2.69077	-2.72493	-4.84845	-1.77715	-2.80611	4.85982	5.32201	0.623737	-2.20101
BRCA__TCGA-A8-A06N	-22.423	-1.59743	-0.784757	0.732168	5.75535	7.22569	5.62515	1.49013	5.66434	1.35119	-0.358449	0.198962	5.11161	3.63896	15.5463	-1.81804	1.51536	4.11739	1.89587	7.56706	4.46568	11.6672	0.966138	5.17765	3.88833	-0.738569	-6.84815	1.00402	-5.75905	-5.1137	-2.23165	0.429166	7.59673	3.29419	0.121781	7.26158	1.86178	6.48328	8.87564	3.60255	6.22462	5.84972	-15.8738	-12.227	-17.4944	-11.6069	-21.6394	-4.5057	-9.22752
BRCA__TCGA-A8-A06O	-10.3962	0.462193	4.42244	1.57534	2.99497	5.93519	5.18629	-1.36842	1.64497	2.08895	4.85227	2.79863	8.25526	3.72462	12.6377	-0.786678	0.131337	3.15192	4.727	6.63081	7.45829	-2.34748	4.39697	9.00607	0.053103	-2.53718	-1.46647	5.83123	-14.9372	-1.48027	-0.690643	2.22159	0.69303	1.50639	4.88519	0.495119	-0.764432	0.320924	0.922994	1.1036	2.45307	1.07793	-5.39773	-3.89264	-5.71352	-5.51526	-8.51104	-1.21361	-5.21243
BRCA__TCGA-A8-A06P	3.47365	0.261504	3.35243	-1.72826	1.13158	7.44129	5.50335	-5.42332	-5.16947	-1.61024	-2.15029	4.92184	-8.4651	4.72511	-6.61455	-4.5201	-0.16587	4.36709	-6.56157	-6.98344	-8.15544	0.498821	-1.51274	-10.0902	-12.7959	-11.3658	-0.373597	-1.54721	-2.7157	-4.23988	-2.09634	3.03566	0.386556	-7.60409	-9.11672	1.23783	-3.63202	-1.64092	-0.599723	3.05974	-0.818913	3.86139	-1.15128	-4.25918	-3.89745	-2.67603	5.10876	0.359765	-2.25216
[truncated: 6,526 more rows]
[truncated: 171 more columns]
