# Supplementary material for: Systematic Pan-Cancer Analysis Reveals Immune Cell Interactions in the Tumor Microenvironment
Source: Oxford University Press journal article supplement (doi:10.1158/0008-5472.can-16-2490), 2017-01-26
Supplement: 00085472can162490-sup-171601_1_supp_3787952_ttb6g7.xlsx [file 00085472can162490-sup-171601_1_supp_3787952_ttb6g7.xlsx]

## Sheet: cell_mut_cor
Supplementary Table S6- Correlations between TCGA mutation load and infiltration score
	CD8+ T cells	B cells	NK cells	Macrophages
ACC	-0.367006	-0.435595	-0.388233	-0.291421		P-value < 0.1
BLCA	0.110564	-0.0400477	0.146687	0.185877
BRCA	0.000526701	0.160709	-0.0373272	-0.0278874
CESC	0.140844	0.06142	0.211398	0.0725301
COAD	0.305108	0.187471	0.16131	0.1589
GBM	-0.111676	0.0159039	-0.0578838	-0.0180958
HNSC	-0.0654135	-0.0155403	-0.0827837	0.140442
KICH	-0.133901	-0.0593284	-0.160089	-0.214864
KIRC	-0.056956	-0.046673	-0.0614794	0.0440291
KIRP	-0.0947163	-0.050593	-0.149953	0.0681169
LGG	-0.119973	-0.0142745	-0.133221	-0.0188641
LIHC	-0.232371	-0.0139838	-0.246773	-0.0914614
LUAD	-0.16768	0.00977139	-0.119259	-0.010341
LUSC	-0.0836721	-0.118518	-0.049657	-0.0911111
OV	-0.0689931	-0.0414914	-0.121049	-0.0713892
PAAD	-0.120644	-0.0439712	-0.155207	0.0279222
PRAD	-0.178966	-0.041822	-0.0922091	0.0636386
READ	0.0815889	0.253542	0.088851	0.120972
SARC	0.0411461	0.180327	0.0232346	0.112976
SKCM	0.054364	-0.0412748	0.0223152	0.14286
THCA	-0.162076	-0.0609398	-0.153485	0.0120104
UCEC	-0.0857143	-0.6	-0.257143	0.257143
UCS	0.191608	-0.132289	0.160478	0.0899031
